# Supplementary material for: Phosphoregulation of DSB-1 mediates control of meiotic double-strand break activity
Source: eLife journal article supplement (doi:10.7554/elife.77956), 2022-06-27

## Figure 2 - Figure Supplement 1

DSB-1 orthologs: [ST]Q in **magenta**, **similarity** and **identity** shown in green. SQ positions in DSB-1 shown in black/magenta.

|                      |                                                                                                                                                         |     |
|----------------------|---------------------------------------------------------------------------------------------------------------------------------------------------------|-----|
| CELEG.F08G5.1a       | ---MFPELQTLQWPIIRYKQLRGSGN---QEGKDIRVMEVNSRKLTVIHGVEPIETVYCNMEVSRYPSLKMKNTNLFVIVN                                                                       | 77  |
| CBRIG.CBG03330       | ---MNSQNSHRGWSLLKYKEIKRSG---REVYNDVRVLLDEPKRIITVFRGMEELERIYCNMEVSKFPCLKMKGPQLYVMVN                                                                      | 76  |
| CDOUG.g17475.t1      | ---MYEQSSNLEWPIIRYKIKRER---REEHLNVRRAILVEPRRAIKVCGIEELEHIYLNMDVSKYPSLKMKGDLLYVLVN                                                                       | 76  |
| CINOP.Sp34_40243400. | MSVLYHKGSIHNWQIIRYKPIRCG---REEHTDVRVLEESSKLLTVCGSEELDSIYCNMEVSKYPALKMKDTPQLYVAVN                                                                        | 79  |
| CKAMA.g1992.t1       | ---MDSQNSTRSWKILKYQLKREN---REYDDVALEDESKRLVMTCKREELQIYYNMDVKRPSLKMKGAQLYVMVN                                                                            | 76  |
| CLATE_recon_pmc      | ---MQHHNSCPQWPILKYKEIKRSG---REEVNNVRLLDDSKRVISVYIGNVEIEHIYCNMEVAKYPCLKMKGSHLYALVN                                                                       | 76  |
| CNIGO.Cni-dsb-1.1    | ---MNSQNSHRGWPLLYKYKEIKRSG---REEYNDVRVLLDEPKRIITVYRGMEELERIYCNMEVSKFP---MKGPQLYVLVN                                                                     | 73  |
| CREMA.FL82_03726     | ---MQHHNSCHQWSILKYKEIKRSG---REEYNNVRVLLDASKRLISVYIGNVEIEHIYCNMEVAKYPCLKMKSTHLYALVN                                                                      | 76  |
| CSINI.Csp5_scaffold_ | ---MNSQNSCRQWPISIKYKEIKRNG---RTEYQNLRLVLLNESKRIIEVFKGAELEHIYCNMEVNKYPFLKMKGLQLYVMFN                                                                     | 76  |
| CTRIB.g22712.t1      | ---MDCQPSGRQWPIIRYKQVKRSG---REEYQNVRMFLDESKRTLIVFHGTEELELVYLRMEVNRYPMLKMRGPQLYVMVN                                                                      | 76  |
| CZANZ.g5350.t1       | ---MDSQNSCKKWLIVNYKEIKRSG---RVENQGLFVLLNESKRIILAVYQRTEELEHYVYCNMKKSKYPCLKMKGPQLYVMVN                                                                    | 76  |
| CELEG.F08G5.1a       | NQAQGFRLTLRGEDREN---LSTVRKFAIYSETPVKDHLNRSSTNT---DVMYNSVEKRKG---GSSSQPTSF <sup>137</sup> SQP---CDIDI                                                    | 150 |
| CBRIG.CBG03330       | AQ <sup>137</sup> QGFRLTFRDKDRNQ---MSTIRRIAYISETPEKNHLNKTFTNT---GNWGTGSGKKKNA---FTSS <sup>143</sup> QPVSSSDR---PV                                       | 147 |
| CDOUG.g17475.t1      | KQGGGFRLTFHSKDRSS---MTAMRKVCYISETPEKNHNMRSFTNT---AMWAADVAQKKGS---ISF <sup>143</sup> QVPNSYHYAPTCL                                                       | 151 |
| CINOP.Sp34_40243400. | NQ <sup>137</sup> QGFRLTFERYDKAQ---LSIIRKIAIYSETPVKNHNMRSFTNT---DRWCTNVGK <sup>143</sup> TQIT---SSSSHPISE <sup>143</sup> Q---PSLT                       | 152 |
| CKAMA.g1992.t1       | GQRQGFRLTFRDQDRQG---LEHVNRNLTISETPEKLEPSRMDWRT---NEWTSETVKTANTSFHLS <sup>137</sup> SQPQSTR---L                                                          | 148 |
| CLATE_recon_pmc      | RQ <sup>137</sup> SGFRVTFSAEHKAQ---MSTIRRIAYISETPEKNHNMRTFTRTGSDRWGRS---ADNNTT---ISS <sup>143</sup> SQPITSEH-RVSR                                       | 151 |
| CNIGO.Cni-dsb-1.1    | TL <sup>137</sup> QGFRLTFRDEDK <sup>137</sup> Q---MSTIRRIAYISETPEKNHLNKTFTNT---GNWGTGSGKKKPT---FTSS <sup>143</sup> QPVLSDDR---PV                        | 144 |
| CREMA.FL82_03726     | RE <sup>137</sup> SGFRVTFSAEQKAQ---MSTIRRIAYISETPEKNHNMRTFTRTG-NRWGRS---ADNNTT---ISS <sup>143</sup> SQPITPSEH-RDPRT                                     | 150 |
| CSINI.Csp5_scaffold_ | AS <sup>137</sup> SGFRVTFCDGDKAQ---MATIRKVAIYSETPPKNHLNKTFTST---DNWGSAGKKNP---VTSS <sup>143</sup> QPVSSGR---H                                           | 145 |
| CTRIB.g22712.t1      | SS <sup>137</sup> QGFRLTFRDGDRAQ---MATIRKMAIYSETPEKNHLNKTFTKI---DNWGSSTGKKKPI---VSS <sup>143</sup> SQPIV <sup>143</sup> SDP---H                         | 146 |
| CZANZ.g5350.t1       | NQNQGFRLTFRDEDRSR---METIRRIAYISETPEKNHLNKTFTSI---DNWGANAGVKKTM---VTSS <sup>143</sup> QPVSYSG---CH                                                       | 146 |
| CELEG.F08G5.1a       | GGSVKKS---AARNLSHTYSTNIGESS---RMPALTANEF <sup>186</sup> FSQVVPYVNPAPASASTVSSSISGAYSVLHDDSPFSGFSPN                                                       | 226 |
| CBRIG.CBG03330       | PSS <sup>186</sup> TQRPAAARNLANSLQSDFFTNR---TTTSS <sup>186</sup> FATPATFY <sup>186</sup> SQVHPNPYSRPISSASSVSSSISALSSLNDDSPFFNF <sup>186</sup> SS        | 225 |
| CDOUG.g17475.t1      | GSPQKKS---AARNLATSFKATTPERAQMSPYSHSHSPVNFY <sup>186</sup> SQVHPNPYPRPVSSASSVSSSISAFSSLNEEGPYLSYPOS                                                      | 231 |
| CINOP.Sp34_40243400. | ETSLKKA---AARNLKFVSTPEFYQNS---DSPS---SPSPFY <sup>186</sup> SQVDSYPRPESNASSVSSSISAYSSLNEDSPFSGF <sup>186</sup> SW                                        | 227 |
| CKAMA.g1992.t1       | SPPRKSPA---ARNL <sup>186</sup> QEMAMDYNNRY---KISKNEPDMRMSH <sup>186</sup> SQVVDIYSRPPSIASSISSSISGVGSSFFDDSP---KFSD                                      | 224 |
| CLATE_recon_pmc      | GFQS---TATRNLAQNFIPELYEGS---QLSSPAISPMSS <sup>186</sup> FSQVHPNPYSRPISSASSISSSISVLSLNDGPPYNF <sup>186</sup> SV                                          | 227 |
| CNIGO.Cni-dsb-1.1    | PSS <sup>186</sup> TQRPAAARNLANSLQSDFFTNR---TTTSS <sup>186</sup> FATPATFY <sup>186</sup> SQVHPNPYSRPISSASSVSSSISALSSLHEDSPFFNF <sup>186</sup> SS        | 222 |
| CREMA.FL82_03726     | GFHSMKT---AARNLAQNFIPELYEGS---QLSSPAISPMSS <sup>186</sup> FSQVHPNPYSRPISSASSISSSISVLSLNDGPPYNF <sup>186</sup> SV                                        | 228 |
| CSINI.Csp5_scaffold_ | ASAPRKPA---AARNLAQSFQSDFFTGNYHAPPSPVPPVTFY <sup>186</sup> SQIHPNPYSRPLSSASSISSTISVMSSLNDSPFYF <sup>186</sup> SG                                         | 225 |
| CTRIB.g22712.t1      | ASASRKPA---AARNLAQSFQSDFFAGINHRQPTAPLQATFY <sup>186</sup> SQIHPNPYTRPLSSASSISSSINSAMSSLNDESPMYNF <sup>186</sup> SC                                      | 226 |
| CZANZ.g5350.t1       | ASTSKKPA---AARNLAQSYQSDFFAENY--- <sup>186</sup> SQPSTSAKTY <sup>186</sup> SQIHPNPYTRPLSSASSISSSISAISSALTEDESPFFSY <sup>186</sup> SK                     | 223 |
| CELEG.F08G5.1a       | SN-HSLQ <sup>248</sup> FPCPSPHSSSFSGF <sup>248</sup> SSSSHS <sup>248</sup> QLSSSPANAPSFDP <sup>248</sup> FHSPPSANDIQIDQLNPVTVAPOIKQTADKCVQTDK           | 305 |
| CBRIG.CBG03330       | SRCCSSYMSPRDLIRSPYSGQVSD---GSSYANLVSH <sup>248</sup> SGNSS <sup>248</sup> QHSS---DPF <sup>248</sup> TQ <sup>248</sup> FSPVTTYNKCQVTDG                   | 292 |
| CDOUG.g17475.t1      | PR-NSCPSSYSPEYRKSPYSN <sup>248</sup> SGQSDPFQSYTTLSSPDPTCF SRLS-----DHL <sup>248</sup> QPSLVKSTENKSVQTD                                                 | 298 |
| CINOP.Sp34_40243400. | SSCSSFQSSC-SAIPATPSSVNSVSGSSHSSSLKLLL-----DPYSSKNPVVHTKNQYVQTEG                                                                                         | 283 |
| CKAMA.g1992.t1       | SR-----PS <sup>248</sup> QSSVSS <sup>248</sup> QYTSL-----QQSS-----NQYSS <sup>248</sup> QNSCDVFDK---KTEI                                                 | 264 |
| CLATE_recon_pmc      | F-----                                                                                                                                                  | 228 |
| CNIGO.Cni-dsb-1.1    | SSCSSYMSPRDLIRSPYSGQVSDAHGSSFTNLVSH <sup>248</sup> SGNSS <sup>248</sup> QHSS---DLF <sup>248</sup> TQ <sup>248</sup> FSPVTTYNKCQVTDG                     | 291 |
| CREMA.FL82_03726     | V-----                                                                                                                                                  | 229 |
| CSINI.Csp5_scaffold_ | SSASSYQSL <sup>248</sup> TQSDHVKSPYSG <sup>248</sup> QVSDHYAPSHTMLACPPPLSL <sup>248</sup> SQQSS-----DPF <sup>248</sup> TQ <sup>248</sup> SPALMTDNKYVQTD | 294 |
| CTRIB.g22712.t1      | SSSSSSFLPT---TPTLYSGSPASDQHAPSFNNLVSTSPLSW <sup>248</sup> SQQSP-----DPF <sup>248</sup> TQ <sup>248</sup> SPAVTSNNKSVQTD                                 | 291 |
| CZANZ.g5350.t1       | SCSSSYASG <sup>248</sup> QSDNMKSPYSG <sup>248</sup> QVSDIHAPSNTLVSTSPLSW <sup>248</sup> SQQSS-----DPF <sup>248</sup> TQ <sup>248</sup> SPVMSKNKSVQTD    | 292 |
| CELEG.F08G5.1a       | QYVDER <sup>375</sup> FDD <sup>375</sup> AFLLRRYIKRVMMSDKMARLVGMM <sup>375</sup> SEIRKLPNDEFDAFYKKVKDHQRTAPSSSSKIGP <sup>375</sup> PA-----              | 375 |
| CBRIG.CBG03330       | SMIDNLAKD <sup>375</sup> IFIGKFLERMVSKSHVNLVRAM <sup>375</sup> REQIRKLPPGKLADFEKTKQTSKDSALSSSI-QPS-----                                                 | 361 |
| CDOUG.g17475.t1      | VLIDQLIQND <sup>375</sup> DEMNAFLMKTKSTKVNLVMT <sup>375</sup> SHIRSMDPKALDSLKRRTESYNNRITS <sup>375</sup> SQPSTRPP-----                                  | 368 |
| CINOP.Sp34_40243400. | CSFDELLKNP <sup>375</sup> AFMEEYLERVKKSDELIRLVKLL <sup>375</sup> SIQKIPLSNFTEFKKAIQSLRQGGHIVPPSI---PL-----                                              | 351 |
| CKAMA.g1992.t1       | TGANFLLSN <sup>375</sup> SPQKIMKRKMMCPDFNLVKKM <sup>375</sup> VQIRMPAEKLEEFRRKTDPTRCNTFEASN---QPTISLFPKEVKD                                             | 341 |
| CLATE_recon_pmc      | -----IFFLHSRIHLCQITYALHSMALKARIRL <sup>375</sup> Q-----QSTRPVGYRGSSSNQH---QPA-----                                                                      | 277 |
| CNIGO.Cni-dsb-1.1    | DIIEKLAKD <sup>375</sup> IFIGKFLERMMSKPKHGNNLVRAM <sup>375</sup> TQIRKLPPGKLADFEKTKPSSSIASVSSASI-QPN-----                                               | 360 |
| CREMA.FL82_03726     | -----PVLLPTRIHLHCQITYALHSMVLRARIRL <sup>375</sup> Q-----HSTRPVGYRGSSSNQH---QPA-----                                                                     | 278 |
| CSINI.Csp5_scaffold_ | NMIDRIVED <sup>375</sup> IFIGKFLERMKNKAKLAELVRTI <sup>375</sup> TQIRQLPADTFENFNKTTDPSCYRDTASS <sup>375</sup> SQ-QPS-----                                | 363 |
| CTRIB.g22712.t1      | NIMDRLAQD <sup>375</sup> IFIGKFLERMMSKPKLADLVRE <sup>375</sup> SHIRHLPSEKLEEFNKATNPSDNRDTPSYSL-QPS-----                                                 | 360 |
| CZANZ.g5350.t1       | SMIDRLVED <sup>375</sup> IFIGKFLERLGKSPKANLVRAM <sup>375</sup> TQIRQLPAEDLVKFNKATNPSONYIASSSNYSL-QPS-----                                               | 361 |
| CELEG.F08G5.1a       | ---IVQQTSDMEF-----                                                                                                                                      | 385 |
| CBRIG.CBG03330       | ---MHHEKSDLEYDVVFENA                                                                                                                                    | 377 |
| CDOUG.g17475.t1      | ---LVHLNSDSECDVFATT                                                                                                                                     | 384 |
| CINOP.Sp34_40243400. | ---VNHQSSLEN---TDN                                                                                                                                      | 364 |
| CKAMA.g1992.t1       | TTDVTNQTSDLEYDVVFH--                                                                                                                                    | 358 |
| CLATE_recon_pmc      | ---VTNQTSDLEYDVVFH--                                                                                                                                    | 291 |
| CNIGO.Cni-dsb-1.1    | ---MHHEKSDLEYDIFGDA                                                                                                                                     | 376 |
| CREMA.FL82_03726     | ---VTNQTSDLEYDVVFH--                                                                                                                                    | 292 |
| CSINI.Csp5_scaffold_ | ---MSHOTSDLEYDLFANN                                                                                                                                     | 379 |
| CTRIB.g22712.t1      | ---MTQQTSDLEYDFVFANI                                                                                                                                    | 376 |
| CZANZ.g5350.t1       | ---LTQQTSDLEYDVVFANI                                                                                                                                    | 377 |

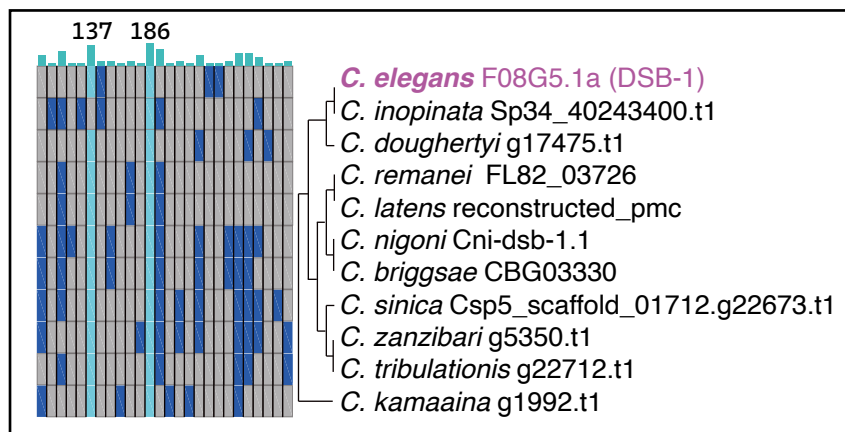

Supplement: supp [file elife-77956-supp-v1.zip › elife_poa_e77956_Figure_2_figure_supplement_1.pdf]
