# Supplementary material for: Phosphoregulation of DSB-1 mediates control of meiotic double-strand break activity
Source: eLife journal article supplement (doi:10.7554/elife.77956), 2022-06-27
Supplement: supp [file elife-77956-supp-v1.zip]

Archive with 36 entries (36 files):
- elife_poa_e77956_Supplementary_file_1.docx
- elife_poa_e77956_Supplementary_file_2.docx
- elife_poa_e77956_Figure_1_figure_supplement_1.pdf
- elife_poa_e77956_Figure_1_figure_supplement_2.pdf
- elife_poa_e77956_Figure_2_figure_supplement_1.pdf
- elife_poa_e77956_Figure_2_figure_supplement_2.pdf
- elife_poa_e77956_Figure_3_figure_supplement_1.pdf
- elife_poa_e77956_Figure_5_figure_supplement_1.pdf
- elife_poa_e77956_Figure_5_figure_supplement_2.pdf
- elife_poa_e77956_Figure_6_figure_supplement_1.pdf
- elife_poa_e77956_Table_1_source_data_1.xlsx
- elife_poa_e77956_Figure_1_source_data_1.xlsx
- elife_poa_e77956_Figure_1_source_data_2.zip
- elife_poa_e77956_Figure_1_source_data_3.zip
- elife_poa_e77956_Figure_1_source_data_4.zip
- elife_poa_e77956_Figure_1_source_data_5.zip
- elife_poa_e77956_Figure_1_source_data_6.zip
- elife_poa_e77956_Figure_1_source_data_7.xlsx
- elife_poa_e77956_Figure_2_source_data_1.xlsx
- elife_poa_e77956_Figure_2_source_data_2.xlsx
- elife_poa_e77956_Figure_3_source_data_1.xlsx
- elife_poa_e77956_Figure_3_source_data_2.xlsx
- elife_poa_e77956_Figure_3_source_data_3.xlsx
- elife_poa_e77956_Figure_4_source_data_1.xlsx
- elife_poa_e77956_Figure_4_source_data_2.xlsx
- elife_poa_e77956_Figure_5_source_data_1.xlsx
- elife_poa_e77956_Figure_5_source_data_2.xlsx
- elife_poa_e77956_Figure_5_source_data_3.zip
- elife_poa_e77956_Figure_6_source_data_1.zip
- elife_poa_e77956_Figure_1_figure_supplement_1_source_data_1.zip
- elife_poa_e77956_Figure_1_figure_supplement_1_source_data_2.zip
- elife_poa_e77956_Figure_1_figure_supplement_1_source_data_3.zip
- elife_poa_e77956_Figure_1_figure_supplement_2_source_data_1.xlsx
- elife_poa_e77956_Figure_5_figure_supplement_1_source_data_1.xlsx
- elife_poa_e77956_Figure_5_figure_supplement_2_source_data_1.xlsx
- elife_poa_e77956_Transparent_Reporting_File.docx
