# Supplementary material for: Phosphoregulation of DSB-1 mediates control of meiotic double-strand break activity
Source: eLife journal article supplement (doi:10.7554/elife.77956), 2022-06-27
Supplement: supp [file elife-77956-supp-v1.zip › elife_poa_e77956_Figure_1_figure_supplement_2_source_data_1.xlsx]

## Sheet: Figure 1–figure supplement 2C
Figure 1–figure supplement 2C Quantification of RAD-51 foci of each genotype
Zone 1	Zone 2	Zone 3	Zone 4	Zone 5	Zone 6	Zone 7	Gonad#	Genotype
0	0	0	5	13	23	5	1	atm1_rad54_24h(n=4)
0	0	0	6	20	28	7	1	atm1_rad54_24h(n=4)
0	0	0	7	20	33	18	1	atm1_rad54_24h(n=4)
0	0	0	8	22	34	21	1	atm1_rad54_24h(n=4)
0	0	1	9	24	34	22	1	atm1_rad54_24h(n=4)
0	0	1	10	29	37	24	1	atm1_rad54_24h(n=4)
0	0	1	10	30	39	27	1	atm1_rad54_24h(n=4)
0	0	1	11	30	39	29	1	atm1_rad54_24h(n=4)
0	0	1	11	30	40	30	1	atm1_rad54_24h(n=4)
0	0	2	11	30	40	34	1	atm1_rad54_24h(n=4)
0	0	2	12	32	41	35	1	atm1_rad54_24h(n=4)
0	0	2	12	33	41	35	1	atm1_rad54_24h(n=4)
0	0	2	12	33	42	36	1	atm1_rad54_24h(n=4)
0	0	2	12	33	42	37	1	atm1_rad54_24h(n=4)
0	0	2	14	33	43	44	1	atm1_rad54_24h(n=4)
0	0	2	14	34	44	52	1	atm1_rad54_24h(n=4)
0	0	2	14	35	45	55	1	atm1_rad54_24h(n=4)
0	0	3	14	36	47	57	1	atm1_rad54_24h(n=4)
0	0	3	14	36	48	59	1	atm1_rad54_24h(n=4)
0	0	3	16	36	49	60	1	atm1_rad54_24h(n=4)
0	0	3	17	37	50	61	1	atm1_rad54_24h(n=4)
1	0	3	18	37	51	64	1	atm1_rad54_24h(n=4)
1	0	3	18	37	52	73	1	atm1_rad54_24h(n=4)
1	1	3	18	38	52	74	1	atm1_rad54_24h(n=4)
1	1	3	19	38	53	74	1	atm1_rad54_24h(n=4)
1	1	3	20	39	56	76	1	atm1_rad54_24h(n=4)
1	1	3	20	39	56	NA	1	atm1_rad54_24h(n=4)
1	1	4	20	40	56	NA	1	atm1_rad54_24h(n=4)
1	1	4	21	40	58	NA	1	atm1_rad54_24h(n=4)
1	1	4	21	40	61	NA	1	atm1_rad54_24h(n=4)
1	1	4	21	40	61	NA	1	atm1_rad54_24h(n=4)
1	1	4	21	40	63	NA	1	atm1_rad54_24h(n=4)
1	1	4	21	41	67	NA	1	atm1_rad54_24h(n=4)
1	1	4	22	41	68	NA	1	atm1_rad54_24h(n=4)
1	1	4	22	41	68	NA	1	atm1_rad54_24h(n=4)
1	1	4	22	41	87	NA	1	atm1_rad54_24h(n=4)
2	1	4	22	42	92	NA	1	atm1_rad54_24h(n=4)
2	1	4	23	43	96	NA	1	atm1_rad54_24h(n=4)
2	1	4	23	43	NA	NA	1	atm1_rad54_24h(n=4)
2	1	4	23	44	NA	NA	1	atm1_rad54_24h(n=4)
2	1	5	24	45	NA	NA	1	atm1_rad54_24h(n=4)
2	1	5	24	45	NA	NA	1	atm1_rad54_24h(n=4)
2	1	5	25	45	NA	NA	1	atm1_rad54_24h(n=4)
2	1	5	25	45	NA	NA	1	atm1_rad54_24h(n=4)
2	1	5	25	45	NA	NA	1	atm1_rad54_24h(n=4)
2	1	5	25	46	NA	NA	1	atm1_rad54_24h(n=4)
2	2	6	26	46	NA	NA	1	atm1_rad54_24h(n=4)
2	2	6	27	46	NA	NA	1	atm1_rad54_24h(n=4)
2	2	6	27	46	NA	NA	1	atm1_rad54_24h(n=4)
3	2	7	28	47	NA	NA	1	atm1_rad54_24h(n=4)
3	2	7	28	47	NA	NA	1	atm1_rad54_24h(n=4)
3	2	7	29	47	NA	NA	1	atm1_rad54_24h(n=4)
3	2	8	29	47	NA	NA	1	atm1_rad54_24h(n=4)
4	2	8	29	48	NA	NA	1	atm1_rad54_24h(n=4)
NA	2	8	30	48	NA	NA	1	atm1_rad54_24h(n=4)
NA	2	9	31	48	NA	NA	1	atm1_rad54_24h(n=4)
NA	2	9	32	50	NA	NA	1	atm1_rad54_24h(n=4)
NA	2	9	33	50	NA	NA	1	atm1_rad54_24h(n=4)
NA	2	9	33	51	NA	NA	1	atm1_rad54_24h(n=4)
NA	2	9	34	51	NA	NA	1	atm1_rad54_24h(n=4)
NA	2	10	34	52	NA	NA	1	atm1_rad54_24h(n=4)
NA	2	10	34	54	NA	NA	1	atm1_rad54_24h(n=4)
NA	2	11	35	57	NA	NA	1	atm1_rad54_24h(n=4)
NA	2	11	35	57	NA	NA	1	atm1_rad54_24h(n=4)
NA	2	11	36	57	NA	NA	1	atm1_rad54_24h(n=4)
NA	3	11	38	NA	NA	NA	1	atm1_rad54_24h(n=4)
NA	3	12	39	NA	NA	NA	1	atm1_rad54_24h(n=4)
NA	3	12	39	NA	NA	NA	1	atm1_rad54_24h(n=4)
NA	3	12	40	NA	NA	NA	1	atm1_rad54_24h(n=4)
NA	3	16	40	NA	NA	NA	1	atm1_rad54_24h(n=4)
NA	4	16	40	NA	NA	NA	1	atm1_rad54_24h(n=4)
NA	4	17	43	NA	NA	NA	1	atm1_rad54_24h(n=4)
NA	5	18	43	NA	NA	NA	1	atm1_rad54_24h(n=4)
NA	7	20	NA	NA	NA	NA	1	atm1_rad54_24h(n=4)
NA	NA	38	NA	NA	NA	NA	1	atm1_rad54_24h(n=4)
0	0	0	0	9	30	32	2	atm1_rad54_24h(n=4)
0	0	0	0	14	34	37	2	atm1_rad54_24h(n=4)
0	0	0	0	15	34	40	2	atm1_rad54_24h(n=4)
0	0	0	0	15	34	42	2	atm1_rad54_24h(n=4)
0	0	0	0	16	39	43	2	atm1_rad54_24h(n=4)
0	0	0	0	16	40	52	2	atm1_rad54_24h(n=4)
0	0	0	0	18	40	53	2	atm1_rad54_24h(n=4)
0	0	0	0	18	40	54	2	atm1_rad54_24h(n=4)
0	0	0	0	19	40	54	2	atm1_rad54_24h(n=4)
1	0	0	0	19	41	56	2	atm1_rad54_24h(n=4)
1	0	0	0	20	42	56	2	atm1_rad54_24h(n=4)
1	0	0	1	20	42	57	2	atm1_rad54_24h(n=4)
1	0	0	1	20	44	57	2	atm1_rad54_24h(n=4)
1	0	0	1	20	44	60	2	atm1_rad54_24h(n=4)
1	0	0	1	20	44	61	2	atm1_rad54_24h(n=4)
1	0	0	1	20	45	62	2	atm1_rad54_24h(n=4)
1	0	0	1	20	46	65	2	atm1_rad54_24h(n=4)
1	0	0	1	21	48	66	2	atm1_rad54_24h(n=4)
1	0	0	1	21	50	66	2	atm1_rad54_24h(n=4)
1	0	0	2	22	51	67	2	atm1_rad54_24h(n=4)
1	0	0	2	23	51	67	2	atm1_rad54_24h(n=4)
1	0	0	2	23	51	68	2	atm1_rad54_24h(n=4)
2	0	0	2	24	53	69	2	atm1_rad54_24h(n=4)
3	0	0	2	24	53	69	2	atm1_rad54_24h(n=4)
3	0	0	2	25	54	69	2	atm1_rad54_24h(n=4)
3	0	0	2	26	54	69	2	atm1_rad54_24h(n=4)
4	0	0	2	26	55	73	2	atm1_rad54_24h(n=4)
4	0	0	2	26	55	74	2	atm1_rad54_24h(n=4)
7	0	0	2	26	56	74	2	atm1_rad54_24h(n=4)
NA	1	0	2	27	57	75	2	atm1_rad54_24h(n=4)
NA	1	0	2	27	57	75	2	atm1_rad54_24h(n=4)
NA	1	0	3	27	58	75	2	atm1_rad54_24h(n=4)
NA	1	0	3	28	58	76	2	atm1_rad54_24h(n=4)
NA	1	1	3	29	59	77	2	atm1_rad54_24h(n=4)
NA	1	1	3	29	60	77	2	atm1_rad54_24h(n=4)
NA	1	1	3	30	60	78	2	atm1_rad54_24h(n=4)
NA	1	1	3	30	61	79	2	atm1_rad54_24h(n=4)
NA	1	1	4	31	66	79	2	atm1_rad54_24h(n=4)
NA	1	1	4	31	67	81	2	atm1_rad54_24h(n=4)
NA	1	1	4	31	68	87	2	atm1_rad54_24h(n=4)
NA	1	1	4	31	72	NA	2	atm1_rad54_24h(n=4)
NA	2	1	4	32	81	NA	2	atm1_rad54_24h(n=4)
NA	2	1	5	32	NA	NA	2	atm1_rad54_24h(n=4)
NA	2	1	5	35	NA	NA	2	atm1_rad54_24h(n=4)
NA	2	1	5	35	NA	NA	2	atm1_rad54_24h(n=4)
NA	3	1	5	36	NA	NA	2	atm1_rad54_24h(n=4)
NA	3	1	5	37	NA	NA	2	atm1_rad54_24h(n=4)
NA	3	1	5	37	NA	NA	2	atm1_rad54_24h(n=4)
NA	NA	2	6	38	NA	NA	2	atm1_rad54_24h(n=4)
NA	NA	2	6	38	NA	NA	2	atm1_rad54_24h(n=4)
NA	NA	2	6	39	NA	NA	2	atm1_rad54_24h(n=4)
NA	NA	2	6	40	NA	NA	2	atm1_rad54_24h(n=4)
NA	NA	2	6	41	NA	NA	2	atm1_rad54_24h(n=4)
NA	NA	2	6	41	NA	NA	2	atm1_rad54_24h(n=4)
NA	NA	2	7	44	NA	NA	2	atm1_rad54_24h(n=4)
NA	NA	2	7	47	NA	NA	2	atm1_rad54_24h(n=4)
NA	NA	2	7	48	NA	NA	2	atm1_rad54_24h(n=4)
NA	NA	2	7	48	NA	NA	2	atm1_rad54_24h(n=4)
NA	NA	2	7	53	NA	NA	2	atm1_rad54_24h(n=4)
NA	NA	2	8	60	NA	NA	2	atm1_rad54_24h(n=4)
NA	NA	3	8	64	NA	NA	2	atm1_rad54_24h(n=4)
NA	NA	3	9	NA	NA	NA	2	atm1_rad54_24h(n=4)
NA	NA	3	9	NA	NA	NA	2	atm1_rad54_24h(n=4)
NA	NA	7	9	NA	NA	NA	2	atm1_rad54_24h(n=4)
NA	NA	NA	9	NA	NA	NA	2	atm1_rad54_24h(n=4)
NA	NA	NA	10	NA	NA	NA	2	atm1_rad54_24h(n=4)
NA	NA	NA	11	NA	NA	NA	2	atm1_rad54_24h(n=4)
NA	NA	NA	11	NA	NA	NA	2	atm1_rad54_24h(n=4)
NA	NA	NA	13	NA	NA	NA	2	atm1_rad54_24h(n=4)
NA	NA	NA	13	NA	NA	NA	2	atm1_rad54_24h(n=4)
NA	NA	NA	14	NA	NA	NA	2	atm1_rad54_24h(n=4)
NA	NA	NA	15	NA	NA	NA	2	atm1_rad54_24h(n=4)
NA	NA	NA	16	NA	NA	NA	2	atm1_rad54_24h(n=4)
NA	NA	NA	16	NA	NA	NA	2	atm1_rad54_24h(n=4)
NA	NA	NA	16	NA	NA	NA	2	atm1_rad54_24h(n=4)
NA	NA	NA	16	NA	NA	NA	2	atm1_rad54_24h(n=4)
NA	NA	NA	21	NA	NA	NA	2	atm1_rad54_24h(n=4)
0	0	0	0	14	7	22	3	atm1_rad54_24h(n=4)
0	0	0	1	14	14	25	3	atm1_rad54_24h(n=4)
0	0	0	1	16	18	34	3	atm1_rad54_24h(n=4)
0	0	0	1	17	20	44	3	atm1_rad54_24h(n=4)
0	0	0	2	18	22	49	3	atm1_rad54_24h(n=4)
0	0	0	2	18	22	50	3	atm1_rad54_24h(n=4)
0	0	0	2	18	27	55	3	atm1_rad54_24h(n=4)
0	0	0	2	19	31	58	3	atm1_rad54_24h(n=4)
0	0	0	2	19	35	63	3	atm1_rad54_24h(n=4)
0	0	0	2	20	36	70	3	atm1_rad54_24h(n=4)
0	0	0	2	22	38	70	3	atm1_rad54_24h(n=4)
0	0	0	3	22	38	70	3	atm1_rad54_24h(n=4)
0	0	0	3	22	39	70	3	atm1_rad54_24h(n=4)
1	0	0	3	23	40	73	3	atm1_rad54_24h(n=4)
1	0	0	3	23	41	75	3	atm1_rad54_24h(n=4)
1	0	0	3	24	41	75	3	atm1_rad54_24h(n=4)
1	0	0	3	25	41	77	3	atm1_rad54_24h(n=4)
1	0	0	3	26	42	101	3	atm1_rad54_24h(n=4)
1	0	0	4	26	42	NA	3	atm1_rad54_24h(n=4)
1	0	0	4	27	43	NA	3	atm1_rad54_24h(n=4)
1	0	0	4	28	43	NA	3	atm1_rad54_24h(n=4)
1	0	0	4	28	45	NA	3	atm1_rad54_24h(n=4)
1	0	0	4	30	46	NA	3	atm1_rad54_24h(n=4)
1	0	0	4	30	47	NA	3	atm1_rad54_24h(n=4)
2	0	0	4	31	51	NA	3	atm1_rad54_24h(n=4)
2	0	1	5	31	51	NA	3	atm1_rad54_24h(n=4)
2	0	1	5	31	55	NA	3	atm1_rad54_24h(n=4)
3	0	1	5	31	56	NA	3	atm1_rad54_24h(n=4)
3	0	1	5	33	56	NA	3	atm1_rad54_24h(n=4)
4	0	1	5	34	56	NA	3	atm1_rad54_24h(n=4)
NA	0	1	5	34	56	NA	3	atm1_rad54_24h(n=4)
NA	0	1	6	35	57	NA	3	atm1_rad54_24h(n=4)
NA	0	1	7	35	57	NA	3	atm1_rad54_24h(n=4)
NA	1	1	7	36	58	NA	3	atm1_rad54_24h(n=4)
NA	1	1	8	36	58	NA	3	atm1_rad54_24h(n=4)
NA	1	1	8	36	59	NA	3	atm1_rad54_24h(n=4)
NA	1	1	9	36	62	NA	3	atm1_rad54_24h(n=4)
NA	1	1	10	38	62	NA	3	atm1_rad54_24h(n=4)
NA	1	1	10	38	63	NA	3	atm1_rad54_24h(n=4)
NA	1	1	11	38	65	NA	3	atm1_rad54_24h(n=4)
NA	1	2	11	39	68	NA	3	atm1_rad54_24h(n=4)
NA	1	2	12	39	74	NA	3	atm1_rad54_24h(n=4)
NA	1	2	12	40	77	NA	3	atm1_rad54_24h(n=4)
NA	1	2	12	40	80	NA	3	atm1_rad54_24h(n=4)
NA	1	2	12	41	136	NA	3	atm1_rad54_24h(n=4)
NA	1	2	13	42	NA	NA	3	atm1_rad54_24h(n=4)
NA	1	2	13	43	NA	NA	3	atm1_rad54_24h(n=4)
NA	1	2	13	43	NA	NA	3	atm1_rad54_24h(n=4)
NA	1	3	14	43	NA	NA	3	atm1_rad54_24h(n=4)
NA	1	3	15	43	NA	NA	3	atm1_rad54_24h(n=4)
NA	1	3	16	44	NA	NA	3	atm1_rad54_24h(n=4)
NA	2	3	17	45	NA	NA	3	atm1_rad54_24h(n=4)
NA	2	3	18	46	NA	NA	3	atm1_rad54_24h(n=4)
NA	2	4	19	47	NA	NA	3	atm1_rad54_24h(n=4)
NA	2	7	19	48	NA	NA	3	atm1_rad54_24h(n=4)
NA	2	NA	20	48	NA	NA	3	atm1_rad54_24h(n=4)
NA	NA	NA	20	48	NA	NA	3	atm1_rad54_24h(n=4)
NA	NA	NA	20	54	NA	NA	3	atm1_rad54_24h(n=4)
NA	NA	NA	21	58	NA	NA	3	atm1_rad54_24h(n=4)
NA	NA	NA	21	69	NA	NA	3	atm1_rad54_24h(n=4)
NA	NA	NA	21	75	NA	NA	3	atm1_rad54_24h(n=4)
NA	NA	NA	21	88	NA	NA	3	atm1_rad54_24h(n=4)
NA	NA	NA	22	NA	NA	NA	3	atm1_rad54_24h(n=4)
NA	NA	NA	23	NA	NA	NA	3	atm1_rad54_24h(n=4)
NA	NA	NA	23	NA	NA	NA	3	atm1_rad54_24h(n=4)
NA	NA	NA	24	NA	NA	NA	3	atm1_rad54_24h(n=4)
NA	NA	NA	24	NA	NA	NA	3	atm1_rad54_24h(n=4)
NA	NA	NA	26	NA	NA	NA	3	atm1_rad54_24h(n=4)
NA	NA	NA	27	NA	NA	NA	3	atm1_rad54_24h(n=4)
NA	NA	NA	29	NA	NA	NA	3	atm1_rad54_24h(n=4)
NA	NA	NA	31	NA	NA	NA	3	atm1_rad54_24h(n=4)
NA	NA	NA	36	NA	NA	NA	3	atm1_rad54_24h(n=4)
NA	NA	NA	38	NA	NA	NA	3	atm1_rad54_24h(n=4)
NA	NA	NA	39	NA	NA	NA	3	atm1_rad54_24h(n=4)
0	0	0	0	15	11	13	4	atm1_rad54_24h(n=4)
0	0	0	0	18	25	15	4	atm1_rad54_24h(n=4)
0	0	0	1	18	29	24	4	atm1_rad54_24h(n=4)
0	0	0	1	18	29	25	4	atm1_rad54_24h(n=4)
0	0	0	2	19	29	28	4	atm1_rad54_24h(n=4)
0	0	0	2	19	30	29	4	atm1_rad54_24h(n=4)
0	0	0	2	20	31	30	4	atm1_rad54_24h(n=4)
0	0	0	2	20	31	34	4	atm1_rad54_24h(n=4)
0	0	0	2	20	31	37	4	atm1_rad54_24h(n=4)
0	0	0	2	21	32	38	4	atm1_rad54_24h(n=4)
0	0	0	3	21	32	40	4	atm1_rad54_24h(n=4)
0	0	0	3	22	32	42	4	atm1_rad54_24h(n=4)
0	0	0	3	23	33	44	4	atm1_rad54_24h(n=4)
0	0	0	3	23	33	44	4	atm1_rad54_24h(n=4)
0	0	0	3	23	33	44	4	atm1_rad54_24h(n=4)
0	0	0	3	24	34	45	4	atm1_rad54_24h(n=4)
0	0	0	4	25	34	46	4	atm1_rad54_24h(n=4)
0	0	0	4	25	35	46	4	atm1_rad54_24h(n=4)
0	0	0	4	26	35	47	4	atm1_rad54_24h(n=4)
0	0	1	4	26	36	48	4	atm1_rad54_24h(n=4)
0	0	1	4	26	36	49	4	atm1_rad54_24h(n=4)
0	0	1	5	26	37	50	4	atm1_rad54_24h(n=4)
1	1	1	5	27	37	52	4	atm1_rad54_24h(n=4)
1	1	1	5	28	38	54	4	atm1_rad54_24h(n=4)
1	1	1	5	29	39	56	4	atm1_rad54_24h(n=4)
1	1	1	6	30	40	57	4	atm1_rad54_24h(n=4)
1	1	1	6	30	40	58	4	atm1_rad54_24h(n=4)
1	1	1	6	30	40	59	4	atm1_rad54_24h(n=4)
1	1	1	7	30	40	60	4	atm1_rad54_24h(n=4)
1	1	1	7	31	41	62	4	atm1_rad54_24h(n=4)
2	1	1	8	31	41	67	4	atm1_rad54_24h(n=4)
2	1	2	9	32	41	NA	4	atm1_rad54_24h(n=4)
2	2	2	9	33	41	NA	4	atm1_rad54_24h(n=4)
2	2	2	9	33	42	NA	4	atm1_rad54_24h(n=4)
3	2	2	10	33	42	NA	4	atm1_rad54_24h(n=4)
3	2	2	10	33	42	NA	4	atm1_rad54_24h(n=4)
NA	2	2	10	33	43	NA	4	atm1_rad54_24h(n=4)
NA	2	2	10	33	44	NA	4	atm1_rad54_24h(n=4)
NA	3	2	10	33	45	NA	4	atm1_rad54_24h(n=4)
NA	4	2	10	33	45	NA	4	atm1_rad54_24h(n=4)
NA	NA	2	10	36	46	NA	4	atm1_rad54_24h(n=4)
NA	NA	2	12	36	46	NA	4	atm1_rad54_24h(n=4)
NA	NA	2	12	39	47	NA	4	atm1_rad54_24h(n=4)
NA	NA	2	12	40	47	NA	4	atm1_rad54_24h(n=4)
NA	NA	2	13	40	47	NA	4	atm1_rad54_24h(n=4)
NA	NA	2	13	40	49	NA	4	atm1_rad54_24h(n=4)
NA	NA	3	14	40	52	NA	4	atm1_rad54_24h(n=4)
NA	NA	3	14	43	53	NA	4	atm1_rad54_24h(n=4)
NA	NA	3	17	44	57	NA	4	atm1_rad54_24h(n=4)
NA	NA	3	19	45	59	NA	4	atm1_rad54_24h(n=4)
NA	NA	3	22	46	62	NA	4	atm1_rad54_24h(n=4)
NA	NA	4	22	46	62	NA	4	atm1_rad54_24h(n=4)
NA	NA	4	22	47	72	NA	4	atm1_rad54_24h(n=4)
NA	NA	NA	25	49	73	NA	4	atm1_rad54_24h(n=4)
NA	NA	NA	27	50	74	NA	4	atm1_rad54_24h(n=4)
NA	NA	NA	27	52	89	NA	4	atm1_rad54_24h(n=4)
NA	NA	NA	40	54	NA	NA	4	atm1_rad54_24h(n=4)
NA	NA	NA	NA	55	NA	NA	4	atm1_rad54_24h(n=4)
NA	NA	NA	NA	60	NA	NA	4	atm1_rad54_24h(n=4)
NA	NA	NA	NA	76	NA	NA	4	atm1_rad54_24h(n=4)
z1	z2	z3	z4	z5	z6	z7	go	gen
0	0	0	19	34	0	0	1	rad54_24h(n=3)
0	0	0	21	37	13	0	1	rad54_24h(n=3)
0	0	1	22	40	15	0	1	rad54_24h(n=3)
0	0	1	29	41	16	2	1	rad54_24h(n=3)
0	0	1	30	42	19	3	1	rad54_24h(n=3)
0	0	1	30	43	20	13	1	rad54_24h(n=3)
0	0	2	31	45	28	16	1	rad54_24h(n=3)
0	0	2	32	46	30	18	1	rad54_24h(n=3)
0	0	2	34	48	32	22	1	rad54_24h(n=3)
0	0	2	34	50	33	23	1	rad54_24h(n=3)
0	0	2	36	51	34	30	1	rad54_24h(n=3)
0	0	2	38	51	35	30	1	rad54_24h(n=3)
0	0	2	38	51	36	31	1	rad54_24h(n=3)
0	0	3	39	53	37	34	1	rad54_24h(n=3)
0	0	3	40	53	38	43	1	rad54_24h(n=3)
0	0	3	40	53	40	50	1	rad54_24h(n=3)
0	0	3	40	54	42	52	1	rad54_24h(n=3)
0	0	3	41	55	42	55	1	rad54_24h(n=3)
0	0	3	41	55	43	56	1	rad54_24h(n=3)
0	0	3	41	55	45	62	1	rad54_24h(n=3)
0	0	4	41	55	47	62	1	rad54_24h(n=3)
0	0	4	42	56	48	67	1	rad54_24h(n=3)
0	0	4	42	56	49	74	1	rad54_24h(n=3)
0	0	4	43	57	50	NA	1	rad54_24h(n=3)
0	0	4	43	58	50	NA	1	rad54_24h(n=3)
0	0	4	43	58	50	NA	1	rad54_24h(n=3)
0	0	4	43	59	51	NA	1	rad54_24h(n=3)
0	0	5	44	59	51	NA	1	rad54_24h(n=3)
0	0	5	44	59	52	NA	1	rad54_24h(n=3)
0	0	5	45	60	53	NA	1	rad54_24h(n=3)
0	0	5	45	60	55	NA	1	rad54_24h(n=3)
0	0	5	45	61	56	NA	1	rad54_24h(n=3)
0	0	5	45	62	56	NA	1	rad54_24h(n=3)
0	1	6	46	62	56	NA	1	rad54_24h(n=3)
0	1	6	47	63	56	NA	1	rad54_24h(n=3)
0	1	6	47	63	56	NA	1	rad54_24h(n=3)
0	1	6	48	64	57	NA	1	rad54_24h(n=3)
0	1	6	48	66	57	NA	1	rad54_24h(n=3)
0	1	7	48	66	57	NA	1	rad54_24h(n=3)
0	1	7	48	66	57	NA	1	rad54_24h(n=3)
0	1	7	48	67	58	NA	1	rad54_24h(n=3)
0	1	7	48	67	58	NA	1	rad54_24h(n=3)
0	1	8	48	68	58	NA	1	rad54_24h(n=3)
0	1	8	49	68	59	NA	1	rad54_24h(n=3)
0	1	8	49	68	59	NA	1	rad54_24h(n=3)
0	1	8	49	69	60	NA	1	rad54_24h(n=3)
0	1	8	49	69	61	NA	1	rad54_24h(n=3)
0	1	8	50	69	62	NA	1	rad54_24h(n=3)
0	1	8	50	69	63	NA	1	rad54_24h(n=3)
0	1	9	50	71	63	NA	1	rad54_24h(n=3)
0	1	9	50	71	63	NA	1	rad54_24h(n=3)
0	1	9	51	71	64	NA	1	rad54_24h(n=3)
0	1	9	51	71	65	NA	1	rad54_24h(n=3)
0	1	10	51	71	66	NA	1	rad54_24h(n=3)
0	1	10	52	71	66	NA	1	rad54_24h(n=3)
0	1	10	52	72	66	NA	1	rad54_24h(n=3)
0	1	10	53	72	67	NA	1	rad54_24h(n=3)
0	1	10	53	73	67	NA	1	rad54_24h(n=3)
0	1	11	53	73	68	NA	1	rad54_24h(n=3)
0	1	11	53	74	68	NA	1	rad54_24h(n=3)
0	1	11	53	74	68	NA	1	rad54_24h(n=3)
0	1	11	54	75	68	NA	1	rad54_24h(n=3)
0	1	11	54	75	69	NA	1	rad54_24h(n=3)
0	1	11	55	75	70	NA	1	rad54_24h(n=3)
0	1	12	55	75	70	NA	1	rad54_24h(n=3)
0	1	13	55	75	70	NA	1	rad54_24h(n=3)
0	1	13	55	75	71	NA	1	rad54_24h(n=3)
0	1	13	55	76	73	NA	1	rad54_24h(n=3)
0	1	13	56	76	74	NA	1	rad54_24h(n=3)
0	1	13	56	76	74	NA	1	rad54_24h(n=3)
1	1	13	56	77	75	NA	1	rad54_24h(n=3)
1	2	13	56	77	77	NA	1	rad54_24h(n=3)
1	2	13	56	77	79	NA	1	rad54_24h(n=3)
1	2	14	57	78	79	NA	1	rad54_24h(n=3)
1	2	14	57	78	84	NA	1	rad54_24h(n=3)
1	2	14	57	78	84	NA	1	rad54_24h(n=3)
1	2	14	57	78	86	NA	1	rad54_24h(n=3)
1	2	14	57	80	89	NA	1	rad54_24h(n=3)
1	2	15	57	80	90	NA	1	rad54_24h(n=3)
1	2	15	58	81	91	NA	1	rad54_24h(n=3)
1	2	15	58	84	91	NA	1	rad54_24h(n=3)
1	2	15	58	87	NA	NA	1	rad54_24h(n=3)
1	2	15	58	89	NA	NA	1	rad54_24h(n=3)
1	2	15	59	91	NA	NA	1	rad54_24h(n=3)
1	2	16	59	92	NA	NA	1	rad54_24h(n=3)
1	2	16	60	104	NA	NA	1	rad54_24h(n=3)
1	2	16	60	NA	NA	NA	1	rad54_24h(n=3)
1	2	16	61	NA	NA	NA	1	rad54_24h(n=3)
1	2	17	62	NA	NA	NA	1	rad54_24h(n=3)
1	2	17	62	NA	NA	NA	1	rad54_24h(n=3)
1	2	17	62	NA	NA	NA	1	rad54_24h(n=3)
1	3	17	63	NA	NA	NA	1	rad54_24h(n=3)
1	3	17	63	NA	NA	NA	1	rad54_24h(n=3)
1	3	17	63	NA	NA	NA	1	rad54_24h(n=3)
1	3	17	63	NA	NA	NA	1	rad54_24h(n=3)
1	3	18	63	NA	NA	NA	1	rad54_24h(n=3)
1	3	18	63	NA	NA	NA	1	rad54_24h(n=3)
1	3	19	63	NA	NA	NA	1	rad54_24h(n=3)
1	3	20	63	NA	NA	NA	1	rad54_24h(n=3)
1	3	20	64	NA	NA	NA	1	rad54_24h(n=3)
1	4	20	64	NA	NA	NA	1	rad54_24h(n=3)
2	4	21	64	NA	NA	NA	1	rad54_24h(n=3)
2	4	21	64	NA	NA	NA	1	rad54_24h(n=3)
2	4	21	65	NA	NA	NA	1	rad54_24h(n=3)
2	NA	21	65	NA	NA	NA	1	rad54_24h(n=3)
2	NA	22	65	NA	NA	NA	1	rad54_24h(n=3)
2	NA	22	65	NA	NA	NA	1	rad54_24h(n=3)
2	NA	22	65	NA	NA	NA	1	rad54_24h(n=3)
3	NA	22	65	NA	NA	NA	1	rad54_24h(n=3)
3	NA	23	65	NA	NA	NA	1	rad54_24h(n=3)
3	NA	23	66	NA	NA	NA	1	rad54_24h(n=3)
3	NA	23	66	NA	NA	NA	1	rad54_24h(n=3)
3	NA	23	67	NA	NA	NA	1	rad54_24h(n=3)
5	NA	23	67	NA	NA	NA	1	rad54_24h(n=3)
NA	NA	23	67	NA	NA	NA	1	rad54_24h(n=3)
NA	NA	24	67	NA	NA	NA	1	rad54_24h(n=3)
NA	NA	24	67	NA	NA	NA	1	rad54_24h(n=3)
NA	NA	24	68	NA	NA	NA	1	rad54_24h(n=3)
NA	NA	25	69	NA	NA	NA	1	rad54_24h(n=3)
NA	NA	25	70	NA	NA	NA	1	rad54_24h(n=3)
NA	NA	25	70	NA	NA	NA	1	rad54_24h(n=3)
NA	NA	26	70	NA	NA	NA	1	rad54_24h(n=3)
NA	NA	26	70	NA	NA	NA	1	rad54_24h(n=3)
NA	NA	26	71	NA	NA	NA	1	rad54_24h(n=3)
NA	NA	27	72	NA	NA	NA	1	rad54_24h(n=3)
NA	NA	27	72	NA	NA	NA	1	rad54_24h(n=3)
NA	NA	27	73	NA	NA	NA	1	rad54_24h(n=3)
NA	NA	27	73	NA	NA	NA	1	rad54_24h(n=3)
NA	NA	28	73	NA	NA	NA	1	rad54_24h(n=3)
NA	NA	28	73	NA	NA	NA	1	rad54_24h(n=3)
NA	NA	28	73	NA	NA	NA	1	rad54_24h(n=3)
NA	NA	28	73	NA	NA	NA	1	rad54_24h(n=3)
NA	NA	28	73	NA	NA	NA	1	rad54_24h(n=3)
NA	NA	29	73	NA	NA	NA	1	rad54_24h(n=3)
NA	NA	29	73	NA	NA	NA	1	rad54_24h(n=3)
NA	NA	29	74	NA	NA	NA	1	rad54_24h(n=3)
NA	NA	30	74	NA	NA	NA	1	rad54_24h(n=3)
NA	NA	30	75	NA	NA	NA	1	rad54_24h(n=3)
NA	NA	30	75	NA	NA	NA	1	rad54_24h(n=3)
NA	NA	30	76	NA	NA	NA	1	rad54_24h(n=3)
NA	NA	30	77	NA	NA	NA	1	rad54_24h(n=3)
NA	NA	31	77	NA	NA	NA	1	rad54_24h(n=3)
NA	NA	31	78	NA	NA	NA	1	rad54_24h(n=3)
NA	NA	31	80	NA	NA	NA	1	rad54_24h(n=3)
NA	NA	31	81	NA	NA	NA	1	rad54_24h(n=3)
NA	NA	31	81	NA	NA	NA	1	rad54_24h(n=3)
NA	NA	31	82	NA	NA	NA	1	rad54_24h(n=3)
NA	NA	32	83	NA	NA	NA	1	rad54_24h(n=3)
NA	NA	32	83	NA	NA	NA	1	rad54_24h(n=3)
NA	NA	32	85	NA	NA	NA	1	rad54_24h(n=3)
NA	NA	33	85	NA	NA	NA	1	rad54_24h(n=3)
NA	NA	33	89	NA	NA	NA	1	rad54_24h(n=3)
NA	NA	33	90	NA	NA	NA	1	rad54_24h(n=3)
NA	NA	34	91	NA	NA	NA	1	rad54_24h(n=3)
NA	NA	34	104	NA	NA	NA	1	rad54_24h(n=3)
NA	NA	34	NA	NA	NA	NA	1	rad54_24h(n=3)
NA	NA	34	NA	NA	NA	NA	1	rad54_24h(n=3)
NA	NA	35	NA	NA	NA	NA	1	rad54_24h(n=3)
NA	NA	35	NA	NA	NA	NA	1	rad54_24h(n=3)
NA	NA	35	NA	NA	NA	NA	1	rad54_24h(n=3)
NA	NA	35	NA	NA	NA	NA	1	rad54_24h(n=3)
NA	NA	36	NA	NA	NA	NA	1	rad54_24h(n=3)
NA	NA	37	NA	NA	NA	NA	1	rad54_24h(n=3)
NA	NA	37	NA	NA	NA	NA	1	rad54_24h(n=3)
NA	NA	37	NA	NA	NA	NA	1	rad54_24h(n=3)
NA	NA	37	NA	NA	NA	NA	1	rad54_24h(n=3)
NA	NA	38	NA	NA	NA	NA	1	rad54_24h(n=3)
NA	NA	38	NA	NA	NA	NA	1	rad54_24h(n=3)
NA	NA	38	NA	NA	NA	NA	1	rad54_24h(n=3)
NA	NA	38	NA	NA	NA	NA	1	rad54_24h(n=3)
NA	NA	38	NA	NA	NA	NA	1	rad54_24h(n=3)
NA	NA	39	NA	NA	NA	NA	1	rad54_24h(n=3)
NA	NA	39	NA	NA	NA	NA	1	rad54_24h(n=3)
NA	NA	39	NA	NA	NA	NA	1	rad54_24h(n=3)
NA	NA	40	NA	NA	NA	NA	1	rad54_24h(n=3)
NA	NA	40	NA	NA	NA	NA	1	rad54_24h(n=3)
NA	NA	40	NA	NA	NA	NA	1	rad54_24h(n=3)
NA	NA	41	NA	NA	NA	NA	1	rad54_24h(n=3)
NA	NA	41	NA	NA	NA	NA	1	rad54_24h(n=3)
NA	NA	42	NA	NA	NA	NA	1	rad54_24h(n=3)
NA	NA	42	NA	NA	NA	NA	1	rad54_24h(n=3)
NA	NA	42	NA	NA	NA	NA	1	rad54_24h(n=3)
NA	NA	43	NA	NA	NA	NA	1	rad54_24h(n=3)
NA	NA	43	NA	NA	NA	NA	1	rad54_24h(n=3)
NA	NA	43	NA	NA	NA	NA	1	rad54_24h(n=3)
NA	NA	43	NA	NA	NA	NA	1	rad54_24h(n=3)
NA	NA	44	NA	NA	NA	NA	1	rad54_24h(n=3)
NA	NA	44	NA	NA	NA	NA	1	rad54_24h(n=3)
NA	NA	44	NA	NA	NA	NA	1	rad54_24h(n=3)
NA	NA	45	NA	NA	NA	NA	1	rad54_24h(n=3)
NA	NA	45	NA	NA	NA	NA	1	rad54_24h(n=3)
NA	NA	46	NA	NA	NA	NA	1	rad54_24h(n=3)
NA	NA	46	NA	NA	NA	NA	1	rad54_24h(n=3)
NA	NA	47	NA	NA	NA	NA	1	rad54_24h(n=3)
NA	NA	47	NA	NA	NA	NA	1	rad54_24h(n=3)
NA	NA	48	NA	NA	NA	NA	1	rad54_24h(n=3)
NA	NA	49	NA	NA	NA	NA	1	rad54_24h(n=3)
NA	NA	54	NA	NA	NA	NA	1	rad54_24h(n=3)
NA	NA	54	NA	NA	NA	NA	1	rad54_24h(n=3)
NA	NA	59	NA	NA	NA	NA	1	rad54_24h(n=3)
NA	NA	63	NA	NA	NA	NA	1	rad54_24h(n=3)
NA	NA	70	NA	NA	NA	NA	1	rad54_24h(n=3)
0	0	0	0	15	19	9	2	rad54_24h(n=3)
0	0	0	4	19	21	9	2	rad54_24h(n=3)
0	0	0	4	19	22	14	2	rad54_24h(n=3)
0	0	0	5	22	22	15	2	rad54_24h(n=3)
0	0	0	6	22	23	18	2	rad54_24h(n=3)
0	0	0	6	22	24	19	2	rad54_24h(n=3)
0	0	0	6	22	25	21	2	rad54_24h(n=3)
0	0	0	6	23	26	26	2	rad54_24h(n=3)
0	0	0	6	23	26	26	2	rad54_24h(n=3)
0	0	0	7	23	26	26	2	rad54_24h(n=3)
0	0	0	7	24	29	27	2	rad54_24h(n=3)
0	0	0	8	25	30	31	2	rad54_24h(n=3)
0	0	0	8	25	30	32	2	rad54_24h(n=3)
0	0	0	8	26	31	35	2	rad54_24h(n=3)
0	0	0	8	26	31	40	2	rad54_24h(n=3)
0	0	0	9	26	31	42	2	rad54_24h(n=3)
0	0	0	9	26	32	45	2	rad54_24h(n=3)
0	0	0	9	27	32	45	2	rad54_24h(n=3)
0	0	0	9	27	32	46	2	rad54_24h(n=3)
0	0	0	9	28	32	47	2	rad54_24h(n=3)
0	0	0	9	28	33	49	2	rad54_24h(n=3)
0	0	0	10	28	34	49	2	rad54_24h(n=3)
0	0	0	10	28	34	50	2	rad54_24h(n=3)
0	0	0	10	29	35	52	2	rad54_24h(n=3)
0	0	0	10	29	36	55	2	rad54_24h(n=3)
0	0	0	11	29	38	55	2	rad54_24h(n=3)
0	0	0	12	29	42	55	2	rad54_24h(n=3)
0	0	0	12	29	43	56	2	rad54_24h(n=3)
0	0	0	12	30	43	56	2	rad54_24h(n=3)
0	0	0	12	30	43	57	2	rad54_24h(n=3)
0	0	0	13	30	43	58	2	rad54_24h(n=3)
0	0	0	13	30	44	59	2	rad54_24h(n=3)
0	0	0	14	30	45	59	2	rad54_24h(n=3)
0	0	0	14	31	46	59	2	rad54_24h(n=3)
1	0	0	14	31	47	63	2	rad54_24h(n=3)
1	0	0	14	31	47	64	2	rad54_24h(n=3)
1	0	0	14	32	48	64	2	rad54_24h(n=3)
1	0	0	16	33	48	65	2	rad54_24h(n=3)
1	0	0	16	33	49	67	2	rad54_24h(n=3)
1	0	0	16	33	50	69	2	rad54_24h(n=3)
1	0	1	17	33	50	70	2	rad54_24h(n=3)
1	0	1	17	33	51	71	2	rad54_24h(n=3)
1	0	1	17	33	51	72	2	rad54_24h(n=3)
1	0	1	17	34	51	73	2	rad54_24h(n=3)
1	0	1	17	34	52	73	2	rad54_24h(n=3)
1	0	1	18	34	52	73	2	rad54_24h(n=3)
1	0	1	18	35	53	74	2	rad54_24h(n=3)
1	0	1	18	35	53	74	2	rad54_24h(n=3)
1	0	1	19	35	53	78	2	rad54_24h(n=3)
1	0	1	19	35	53	82	2	rad54_24h(n=3)
1	0	1	19	35	55	82	2	rad54_24h(n=3)
1	0	1	19	35	55	86	2	rad54_24h(n=3)
2	0	1	19	35	55	NA	2	rad54_24h(n=3)
2	0	1	20	36	55	NA	2	rad54_24h(n=3)
2	0	1	21	36	56	NA	2	rad54_24h(n=3)
2	0	1	22	36	56	NA	2	rad54_24h(n=3)
2	0	1	22	36	57	NA	2	rad54_24h(n=3)
2	0	1	22	37	58	NA	2	rad54_24h(n=3)
2	0	1	23	37	58	NA	2	rad54_24h(n=3)
2	0	1	24	37	58	NA	2	rad54_24h(n=3)
2	0	1	24	37	59	NA	2	rad54_24h(n=3)
2	0	1	24	38	59	NA	2	rad54_24h(n=3)
3	0	1	24	38	60	NA	2	rad54_24h(n=3)
4	0	1	25	38	60	NA	2	rad54_24h(n=3)
5	0	1	26	38	61	NA	2	rad54_24h(n=3)
NA	0	1	26	39	61	NA	2	rad54_24h(n=3)
NA	0	2	26	39	61	NA	2	rad54_24h(n=3)
NA	0	2	26	39	62	NA	2	rad54_24h(n=3)
NA	0	2	26	39	63	NA	2	rad54_24h(n=3)
NA	0	2	26	39	63	NA	2	rad54_24h(n=3)
NA	0	2	26	40	63	NA	2	rad54_24h(n=3)
NA	0	2	27	40	64	NA	2	rad54_24h(n=3)
NA	0	2	27	41	66	NA	2	rad54_24h(n=3)
NA	0	2	27	42	66	NA	2	rad54_24h(n=3)
NA	0	2	27	42	67	NA	2	rad54_24h(n=3)
NA	1	2	27	42	68	NA	2	rad54_24h(n=3)
NA	1	2	27	43	68	NA	2	rad54_24h(n=3)
NA	1	2	27	43	68	NA	2	rad54_24h(n=3)
NA	1	2	28	43	69	NA	2	rad54_24h(n=3)
NA	1	2	28	43	69	NA	2	rad54_24h(n=3)
NA	1	2	28	43	69	NA	2	rad54_24h(n=3)
NA	1	2	28	44	69	NA	2	rad54_24h(n=3)
NA	1	2	28	44	70	NA	2	rad54_24h(n=3)
NA	1	2	28	44	70	NA	2	rad54_24h(n=3)
NA	1	2	28	44	71	NA	2	rad54_24h(n=3)
NA	1	2	29	45	71	NA	2	rad54_24h(n=3)
NA	1	2	29	45	71	NA	2	rad54_24h(n=3)
NA	1	2	29	46	72	NA	2	rad54_24h(n=3)
NA	1	2	29	46	74	NA	2	rad54_24h(n=3)
NA	1	3	29	47	75	NA	2	rad54_24h(n=3)
NA	1	3	30	47	76	NA	2	rad54_24h(n=3)
NA	1	3	30	47	76	NA	2	rad54_24h(n=3)
NA	1	3	31	47	80	NA	2	rad54_24h(n=3)
NA	1	3	31	48	NA	NA	2	rad54_24h(n=3)
NA	1	3	32	48	NA	NA	2	rad54_24h(n=3)
NA	1	3	32	48	NA	NA	2	rad54_24h(n=3)
NA	1	3	32	48	NA	NA	2	rad54_24h(n=3)
NA	1	3	33	48	NA	NA	2	rad54_24h(n=3)
NA	1	3	33	48	NA	NA	2	rad54_24h(n=3)
NA	1	4	35	49	NA	NA	2	rad54_24h(n=3)
NA	1	4	36	49	NA	NA	2	rad54_24h(n=3)
NA	1	4	37	50	NA	NA	2	rad54_24h(n=3)
NA	1	4	37	50	NA	NA	2	rad54_24h(n=3)
NA	2	4	42	50	NA	NA	2	rad54_24h(n=3)
NA	2	4	43	50	NA	NA	2	rad54_24h(n=3)
NA	2	4	43	51	NA	NA	2	rad54_24h(n=3)
NA	2	4	45	51	NA	NA	2	rad54_24h(n=3)
NA	2	4	NA	51	NA	NA	2	rad54_24h(n=3)
NA	2	4	NA	51	NA	NA	2	rad54_24h(n=3)
NA	2	4	NA	52	NA	NA	2	rad54_24h(n=3)
NA	2	4	NA	52	NA	NA	2	rad54_24h(n=3)
NA	2	4	NA	52	NA	NA	2	rad54_24h(n=3)
NA	2	5	NA	53	NA	NA	2	rad54_24h(n=3)
NA	2	5	NA	53	NA	NA	2	rad54_24h(n=3)
NA	2	5	NA	53	NA	NA	2	rad54_24h(n=3)
NA	2	5	NA	54	NA	NA	2	rad54_24h(n=3)
NA	3	5	NA	54	NA	NA	2	rad54_24h(n=3)
NA	3	5	NA	54	NA	NA	2	rad54_24h(n=3)
NA	3	5	NA	55	NA	NA	2	rad54_24h(n=3)
NA	NA	5	NA	55	NA	NA	2	rad54_24h(n=3)
NA	NA	5	NA	56	NA	NA	2	rad54_24h(n=3)
NA	NA	6	NA	56	NA	NA	2	rad54_24h(n=3)
NA	NA	6	NA	56	NA	NA	2	rad54_24h(n=3)
NA	NA	6	NA	56	NA	NA	2	rad54_24h(n=3)
NA	NA	6	NA	58	NA	NA	2	rad54_24h(n=3)
NA	NA	6	NA	58	NA	NA	2	rad54_24h(n=3)
NA	NA	6	NA	57	NA	NA	2	rad54_24h(n=3)
NA	NA	6	NA	57	NA	NA	2	rad54_24h(n=3)
NA	NA	6	NA	59	NA	NA	2	rad54_24h(n=3)
NA	NA	6	NA	59	NA	NA	2	rad54_24h(n=3)
NA	NA	6	NA	60	NA	NA	2	rad54_24h(n=3)
NA	NA	7	NA	61	NA	NA	2	rad54_24h(n=3)
NA	NA	NA	NA	65	NA	NA	2	rad54_24h(n=3)
NA	NA	NA	NA	65	NA	NA	2	rad54_24h(n=3)
NA	NA	NA	NA	68	NA	NA	2	rad54_24h(n=3)
NA	NA	NA	NA	68	NA	NA	2	rad54_24h(n=3)
0	0	0	11	13	16	20	3	rad54_24h(n=3)
0	0	0	11	14	17	24	3	rad54_24h(n=3)
0	0	0	11	15	19	24	3	rad54_24h(n=3)
0	0	0	13	16	20	25	3	rad54_24h(n=3)
0	0	0	13	17	21	28	3	rad54_24h(n=3)
0	0	0	13	17	21	36	3	rad54_24h(n=3)
0	0	0	14	17	21	40	3	rad54_24h(n=3)
0	0	0	15	17	22	41	3	rad54_24h(n=3)
0	0	0	16	17	23	43	3	rad54_24h(n=3)
0	0	0	16	18	24	43	3	rad54_24h(n=3)
0	0	0	16	18	25	45	3	rad54_24h(n=3)
0	0	0	16	19	25	45	3	rad54_24h(n=3)
0	0	0	17	19	25	48	3	rad54_24h(n=3)
0	0	1	17	20	26	50	3	rad54_24h(n=3)
0	0	1	17	21	30	51	3	rad54_24h(n=3)
0	0	1	17	21	31	51	3	rad54_24h(n=3)
0	0	1	17	22	31	51	3	rad54_24h(n=3)
0	0	1	17	23	31	53	3	rad54_24h(n=3)
0	0	1	17	24	32	53	3	rad54_24h(n=3)
0	0	1	18	25	34	54	3	rad54_24h(n=3)
0	0	1	18	25	34	54	3	rad54_24h(n=3)
0	0	1	19	25	34	56	3	rad54_24h(n=3)
0	0	1	19	26	35	60	3	rad54_24h(n=3)
0	0	1	19	26	36	61	3	rad54_24h(n=3)
0	0	1	19	26	36	62	3	rad54_24h(n=3)
0	0	1	20	28	37	63	3	rad54_24h(n=3)
0	0	1	20	29	40	64	3	rad54_24h(n=3)
0	0	1	20	30	41	65	3	rad54_24h(n=3)
0	0	1	20	31	42	66	3	rad54_24h(n=3)
1	0	2	20	31	43	69	3	rad54_24h(n=3)
1	0	2	21	34	45	70	3	rad54_24h(n=3)
1	0	2	21	34	47	74	3	rad54_24h(n=3)
1	0	2	21	34	47	77	3	rad54_24h(n=3)
1	0	2	21	34	47	78	3	rad54_24h(n=3)
1	0	2	22	35	48	78	3	rad54_24h(n=3)
1	0	2	22	35	48	79	3	rad54_24h(n=3)
1	0	2	22	36	49	80	3	rad54_24h(n=3)
1	0	2	22	37	50	NA	3	rad54_24h(n=3)
1	0	3	22	38	51	NA	3	rad54_24h(n=3)
1	0	3	23	39	52	NA	3	rad54_24h(n=3)
1	0	3	23	39	53	NA	3	rad54_24h(n=3)
1	0	3	23	40	53	NA	3	rad54_24h(n=3)
1	0	3	23	40	53	NA	3	rad54_24h(n=3)
1	0	3	23	41	54	NA	3	rad54_24h(n=3)
1	0	3	23	41	55	NA	3	rad54_24h(n=3)
1	0	3	24	41	55	NA	3	rad54_24h(n=3)
1	0	4	24	43	55	NA	3	rad54_24h(n=3)
1	0	4	25	44	56	NA	3	rad54_24h(n=3)
1	0	4	25	45	59	NA	3	rad54_24h(n=3)
1	0	4	25	45	60	NA	3	rad54_24h(n=3)
1	0	4	25	45	60	NA	3	rad54_24h(n=3)
1	0	4	25	46	60	NA	3	rad54_24h(n=3)
1	1	4	26	47	60	NA	3	rad54_24h(n=3)
1	1	5	26	48	61	NA	3	rad54_24h(n=3)
1	1	5	26	48	62	NA	3	rad54_24h(n=3)
2	1	5	26	48	63	NA	3	rad54_24h(n=3)
2	1	5	26	48	64	NA	3	rad54_24h(n=3)
2	1	5	27	49	66	NA	3	rad54_24h(n=3)
2	1	5	27	49	67	NA	3	rad54_24h(n=3)
2	1	6	27	49	67	NA	3	rad54_24h(n=3)
2	1	6	27	49	69	NA	3	rad54_24h(n=3)
2	1	6	27	50	70	NA	3	rad54_24h(n=3)
2	1	6	27	50	76	NA	3	rad54_24h(n=3)
2	1	6	27	50	NA	NA	3	rad54_24h(n=3)
2	1	7	27	51	NA	NA	3	rad54_24h(n=3)
2	1	7	27	51	NA	NA	3	rad54_24h(n=3)
3	1	7	28	51	NA	NA	3	rad54_24h(n=3)
3	1	8	28	52	NA	NA	3	rad54_24h(n=3)
3	1	8	28	52	NA	NA	3	rad54_24h(n=3)
3	1	8	28	53	NA	NA	3	rad54_24h(n=3)
4	1	8	28	53	NA	NA	3	rad54_24h(n=3)
4	1	9	28	53	NA	NA	3	rad54_24h(n=3)
4	1	9	28	53	NA	NA	3	rad54_24h(n=3)
4	1	9	28	54	NA	NA	3	rad54_24h(n=3)
NA	1	9	29	54	NA	NA	3	rad54_24h(n=3)
NA	1	9	29	55	NA	NA	3	rad54_24h(n=3)
NA	2	9	29	57	NA	NA	3	rad54_24h(n=3)
NA	2	10	29	57	NA	NA	3	rad54_24h(n=3)
NA	2	10	30	58	NA	NA	3	rad54_24h(n=3)
NA	2	10	30	59	NA	NA	3	rad54_24h(n=3)
NA	2	10	30	59	NA	NA	3	rad54_24h(n=3)
NA	2	11	30	59	NA	NA	3	rad54_24h(n=3)
NA	2	11	31	60	NA	NA	3	rad54_24h(n=3)
NA	2	11	31	61	NA	NA	3	rad54_24h(n=3)
NA	2	11	32	63	NA	NA	3	rad54_24h(n=3)
NA	2	11	32	64	NA	NA	3	rad54_24h(n=3)
NA	2	11	33	72	NA	NA	3	rad54_24h(n=3)
NA	2	11	33	72	NA	NA	3	rad54_24h(n=3)
NA	3	12	33	76	NA	NA	3	rad54_24h(n=3)
NA	3	13	34	80	NA	NA	3	rad54_24h(n=3)
NA	4	13	34	NA	NA	NA	3	rad54_24h(n=3)
NA	NA	13	36	NA	NA	NA	3	rad54_24h(n=3)
NA	NA	13	36	NA	NA	NA	3	rad54_24h(n=3)
NA	NA	14	36	NA	NA	NA	3	rad54_24h(n=3)
NA	NA	15	36	NA	NA	NA	3	rad54_24h(n=3)
NA	NA	15	36	NA	NA	NA	3	rad54_24h(n=3)
NA	NA	15	36	NA	NA	NA	3	rad54_24h(n=3)
NA	NA	15	38	NA	NA	NA	3	rad54_24h(n=3)
NA	NA	15	39	NA	NA	NA	3	rad54_24h(n=3)
NA	NA	16	39	NA	NA	NA	3	rad54_24h(n=3)
NA	NA	17	39	NA	NA	NA	3	rad54_24h(n=3)
NA	NA	18	40	NA	NA	NA	3	rad54_24h(n=3)
NA	NA	18	40	NA	NA	NA	3	rad54_24h(n=3)
NA	NA	20	41	NA	NA	NA	3	rad54_24h(n=3)
NA	NA	21	41	NA	NA	NA	3	rad54_24h(n=3)
NA	NA	22	41	NA	NA	NA	3	rad54_24h(n=3)
NA	NA	23	42	NA	NA	NA	3	rad54_24h(n=3)
NA	NA	24	42	NA	NA	NA	3	rad54_24h(n=3)
NA	NA	27	44	NA	NA	NA	3	rad54_24h(n=3)
NA	NA	27	44	NA	NA	NA	3	rad54_24h(n=3)
NA	NA	NA	45	NA	NA	NA	3	rad54_24h(n=3)
NA	NA	NA	45	NA	NA	NA	3	rad54_24h(n=3)
NA	NA	NA	45	NA	NA	NA	3	rad54_24h(n=3)
NA	NA	NA	46	NA	NA	NA	3	rad54_24h(n=3)
NA	NA	NA	46	NA	NA	NA	3	rad54_24h(n=3)
NA	NA	NA	46	NA	NA	NA	3	rad54_24h(n=3)
NA	NA	NA	46	NA	NA	NA	3	rad54_24h(n=3)
NA	NA	NA	46	NA	NA	NA	3	rad54_24h(n=3)
NA	NA	NA	47	NA	NA	NA	3	rad54_24h(n=3)
NA	NA	NA	49	NA	NA	NA	3	rad54_24h(n=3)
NA	NA	NA	49	NA	NA	NA	3	rad54_24h(n=3)
NA	NA	NA	49	NA	NA	NA	3	rad54_24h(n=3)
NA	NA	NA	50	NA	NA	NA	3	rad54_24h(n=3)
NA	NA	NA	51	NA	NA	NA	3	rad54_24h(n=3)
NA	NA	NA	52	NA	NA	NA	3	rad54_24h(n=3)
NA	NA	NA	56	NA	NA	NA	3	rad54_24h(n=3)
NA	NA	NA	59	NA	NA	NA	3	rad54_24h(n=3)
NA	NA	NA	58	NA	NA	NA	3	rad54_24h(n=3)
NA	NA	NA	61	NA	NA	NA	3	rad54_24h(n=3)
NA	NA	NA	64	NA	NA	NA	3	rad54_24h(n=3)
NA	NA	NA	64	NA	NA	NA	3	rad54_24h(n=3)
NA	NA	NA	68	NA	NA	NA	3	rad54_24h(n=3)
NA	NA	NA	72	NA	NA	NA	3	rad54_24h(n=3)
NA	NA	NA	73	NA	NA	NA	3	rad54_24h(n=3)
NA	NA	NA	77	NA	NA	NA	3	rad54_24h(n=3)
NA	NA	NA	78	NA	NA	NA	3	rad54_24h(n=3)
