# Supplementary material for: Phosphoregulation of DSB-1 mediates control of meiotic double-strand break activity
Source: eLife journal article supplement (doi:10.7554/elife.77956), 2022-06-27
Supplement: supp [file elife-77956-supp-v1.zip › elife_poa_e77956_Figure_1_source_data_1.xlsx]

## Sheet: Figure 1A
Figure 1A: GFP-DSB-1 (ctrl) versus GFP-DSB-1;pph-4.1
Figure 1A replicate 1
20210709_1442_deftop_standard40sec_large
	Area	Mean	Min	Max	X	Y	IntDen	RawIntDen	Slice			ctrl-ratios	pp4-ratios
ctrl-high	1898	72.49	46	94	359.5	556	137595	137595	1			0.373778	1.51826
ctrl-low	1898	99.52	52	127	358.5	596	188887	188887	1			0.304874	2.21693
pp4-high	1898	80.96	57	109	437.5	551	153668	153668	1			0.494822	1.95441
pp4-low	1898	72.57	60	84	436.5	593	137731	137731	1			0.561058	1.59183
background	1898	56.36	50	66	396.5	679	106980	106980	1			0.516105	1.04061
												0.4182	1.80014
ctrl ratio minus back		0.373778
pp4 ratio minus back		1.51826										> t.test(x=a$ctrl.ratios,y=a$pp4.ratios,paired=TRUE)
Figure 1A replicate 2													Paired t-test
20210709_1500_abc_top_large_high4min
	Area	Mean	Min	Max	X	Y	IntDen	RawIntDen	Slice			data: a$ctrl.ratios and a$pp4.ratios
ctrl-high	2496	42.78	22	61	432	617	106784	106784	1			t = -6.5325, df = 5, p-value = 0.001258
ctrl-low	2496	55.32	32	75	431	652	138073	138073	1			alternative hypothesis: true difference in means is not equal to 0
pp4-high	2496	46.38	22	69	514	617	115769	115769	1			95 percent confidence interval:
pp4-low	2496	41.39	27	59	514	652	103304	103304	1			-1.731047 -0.753401
background	2496	37.28	27	50	474	707	93061	93061	1			sample estimates:
												mean of the differences
ctrl ratio minus back		0.304874										-1.24222
pp4 ratio minus back		2.21693
Figure 1A replicate 3
20210728_1529high6min gel1
	Area	Mean	Min	Max	X	Y	IntDen	RawIntDen	Slice	Note
ctrl-low	2044	87.15	30	128	643.5	724	178132	178132	1	note order of ROIs is different here (see picture)
ctrl-high	2044	66.95	31	92	642.5	692	136841	136841	1
pp4-high	2044	79.93	45	128	1094.5	676	163383	163383	1
pp4-low	2044	63.93	40	93	1093.5	711	130671	130671	1
backgroundMean	2044	47.16	36.5	57.5	870	798	96396.5	96396.5	1
background1	2044	51.71	43	63	1092.5	795	105692	105692	1
background2	2044	42.61	30	52	647.5	801	87101	87101	1
ctrl ratio minus back		0.494822
pp4 ratio minus back		1.95441
Figure 1A replicate 4
20210728_1445standard30sec_gel2
	Area	Mean	Min	Max	X	Y	IntDen	RawIntDen	Slice	Note
ctrl-high	2304	53.31	35	66	596	560	122821	122821	1
ctrl-low	2304	64.25	37	81	596	595	148022	148022	1
pp4-high	2304	67.34	43	96	1060	537	155156	155156	1
pp4-low	2304	56.93	44	71	1060	574	131158	131158	1
backgroundMean	2304	39.33	29.5	45	829.5	659	90609	90609	1
background1	2304	36.3	26	42	1060	649	83630	83630	1
background2	2304	42.36	33	48	599	669	97588	97588	1
ctrl ratio minus back		0.561058
pp4 ratio minus back		1.59183
Figure 1A replicate 5
20210730_1627_rinse_newECL_AB_standard10min				upper gel in image file
	Area	Mean	Min	Max	X	Y	IntDen	RawIntDen	Slice	Note
pp4-high	504	61.2	38	86	831	360	30847	30847	1	note order of ROIs is different here (see picture)
pp4-low	504	59.26	45	76	832	383	29865	29865	1
ctrl-high	504	38.09	26	55	481	348	19199	19199	1
ctrl-low	504	63.24	54	72	481	371	31871	31871	1
backgroundMean	504	11.28	7	15.5	655	446.5	5683.5	5683.5	1
background1	504	8.45	5	12	481	447	4258	4258	1
background2	504	14.11	9	19	829	446	7109	7109	1
ctrl ratio minus back		0.516105
pp4 ratio minus back		1.04061
Figure 1A replicate 6
20210730_1627_rinse_newECL_AB_standard10min				lower gel in image file
	Area	Mean	Min	Max	X	Y	IntDen	RawIntDen	Slice	Note
ctrl-high	1155	56.53	15	90	509.5	889.5	65296	65296	1
ctrl-low	1155	90.88	22	123	509.5	919.5	104964	104964	1
pp4-high	1155	71.12	18	127	845.5	887.5	82138	82138	1
pp4-low	1155	53.66	21	89	845.5	914.5	61978	61978	1
backgroundMean	1155	31.845	13.5	45	678.5	996.5	36782.5	36782.5	1
background1	1155	26.34	13	39	845.5	989.5	30420	30420	1
background2	1155	37.35	14	51	511.5	1003.5	43145	43145	1
ctrl ratio minus back		0.4182
pp4 ratio minus back		1.80014
