# Supplementary material for: Phosphoregulation of DSB-1 mediates control of meiotic double-strand break activity
Source: eLife journal article supplement (doi:10.7554/elife.77956), 2022-06-27
Supplement: supp [file elife-77956-supp-v1.zip › elife_poa_e77956_Figure_1_source_data_7.xlsx]

## Sheet: Figure 1H
Figure 1H Quantification of RAD-51 foci of each genotype
Zone 1	Zone 2	Zone 3	Zone 4	Zone 5	Zone 6	Zone 7	Genotype
0	0	0	0	0	0	0	WT(n=7)
0	0	0	0	0	0	0	WT(n=7)
0	0	0	0	0	0	0	WT(n=7)
0	0	0	0	0	0	0	WT(n=7)
0	0	0	1	0	0	0	WT(n=7)
0	0	0	1	0	0	0	WT(n=7)
0	0	0	1	0	0	0	WT(n=7)
0	0	0	1	0	0	0	WT(n=7)
0	0	0	1	0	0	0	WT(n=7)
0	0	0	1	0	0	0	WT(n=7)
0	0	0	1	0	0	0	WT(n=7)
0	0	0	1	0	0	0	WT(n=7)
0	0	0	1	0	0	0	WT(n=7)
0	0	0	1	0	0	0	WT(n=7)
0	0	0	1	0	0	0	WT(n=7)
0	0	0	2	0	0	0	WT(n=7)
0	0	0	2	0	0	0	WT(n=7)
0	0	0	2	0	0	0	WT(n=7)
0	0	0	2	0	0	1	WT(n=7)
0	0	0	2	0	0	NA	WT(n=7)
0	0	0	2	0	0	NA	WT(n=7)
0	0	0	2	0	0	NA	WT(n=7)
0	0	1	2	1	0	NA	WT(n=7)
0	0	1	3	1	0	NA	WT(n=7)
0	0	1	3	1	0	NA	WT(n=7)
0	0	1	3	1	0	NA	WT(n=7)
0	0	1	3	1	0	NA	WT(n=7)
0	0	1	3	1	0	NA	WT(n=7)
0	0	1	3	1	0	NA	WT(n=7)
0	0	1	3	1	0	NA	WT(n=7)
0	0	1	3	1	0	NA	WT(n=7)
0	0	1	3	1	0	NA	WT(n=7)
0	0	1	3	1	0	NA	WT(n=7)
0	0	1	3	1	0	NA	WT(n=7)
0	0	1	3	1	0	NA	WT(n=7)
0	0	1	4	1	0	NA	WT(n=7)
0	0	1	4	1	0	NA	WT(n=7)
0	0	2	4	1	0	NA	WT(n=7)
0	0	2	4	1	1	NA	WT(n=7)
0	0	2	4	2	1	NA	WT(n=7)
0	0	2	4	2	1	NA	WT(n=7)
0	0	2	4	2	2	NA	WT(n=7)
0	0	2	5	2	4	NA	WT(n=7)
0	0	2	5	2	NA	NA	WT(n=7)
0	0	2	5	2	NA	NA	WT(n=7)
0	0	3	5	2	NA	NA	WT(n=7)
0	0	3	5	2	NA	NA	WT(n=7)
0	0	3	5	2	NA	NA	WT(n=7)
0	0	3	5	2	NA	NA	WT(n=7)
0	0	3	5	2	NA	NA	WT(n=7)
0	0	3	5	2	NA	NA	WT(n=7)
0	0	3	5	3	NA	NA	WT(n=7)
0	0	4	5	3	NA	NA	WT(n=7)
0	0	4	5	3	NA	NA	WT(n=7)
0	0	4	6	3	NA	NA	WT(n=7)
1	0	4	6	4	NA	NA	WT(n=7)
1	0	4	6	4	NA	NA	WT(n=7)
1	0	4	6	5	NA	NA	WT(n=7)
1	0	4	6	5	NA	NA	WT(n=7)
1	0	4	6	5	NA	NA	WT(n=7)
1	0	4	7	5	NA	NA	WT(n=7)
1	0	5	7	7	NA	NA	WT(n=7)
1	0	5	7	NA	NA	NA	WT(n=7)
1	0	5	7	NA	NA	NA	WT(n=7)
1	0	5	7	NA	NA	NA	WT(n=7)
NA	0	5	7	NA	NA	NA	WT(n=7)
NA	0	5	7	NA	NA	NA	WT(n=7)
NA	0	6	8	NA	NA	NA	WT(n=7)
NA	1	6	8	NA	NA	NA	WT(n=7)
NA	1	6	8	NA	NA	NA	WT(n=7)
NA	1	7	8	NA	NA	NA	WT(n=7)
NA	1	7	9	NA	NA	NA	WT(n=7)
NA	1	8	9	NA	NA	NA	WT(n=7)
NA	1	NA	9	NA	NA	NA	WT(n=7)
NA	1	NA	9	NA	NA	NA	WT(n=7)
0	0	0	1	0	0	0	WT(n=7)
0	0	0	1	0	0	0	WT(n=7)
0	0	0	1	0	0	0	WT(n=7)
0	0	0	1	0	0	0	WT(n=7)
0	0	0	1	0	0	0	WT(n=7)
0	0	0	1	0	0	0	WT(n=7)
0	0	0	1	0	0	0	WT(n=7)
0	0	0	1	0	0	0	WT(n=7)
0	0	0	2	0	0	0	WT(n=7)
0	0	0	2	0	0	0	WT(n=7)
0	0	0	2	0	0	0	WT(n=7)
0	0	0	2	0	0	0	WT(n=7)
0	0	0	2	0	0	0	WT(n=7)
0	0	0	2	0	0	0	WT(n=7)
0	0	0	3	0	0	0	WT(n=7)
0	0	0	3	0	0	0	WT(n=7)
0	0	0	3	1	0	0	WT(n=7)
0	0	0	3	1	0	0	WT(n=7)
0	0	0	3	1	0	0	WT(n=7)
0	0	0	3	1	0	0	WT(n=7)
0	0	0	3	1	1	0	WT(n=7)
0	0	0	3	1	1	0	WT(n=7)
0	0	0	3	1	1	0	WT(n=7)
0	0	0	3	1	1	1	WT(n=7)
0	0	0	4	1	1	2	WT(n=7)
0	0	0	4	1	1	NA	WT(n=7)
0	0	0	4	1	1	NA	WT(n=7)
0	0	0	4	1	1	NA	WT(n=7)
0	0	0	4	1	1	NA	WT(n=7)
0	0	0	4	1	1	NA	WT(n=7)
0	0	0	4	2	1	NA	WT(n=7)
0	0	0	4	2	1	NA	WT(n=7)
0	0	0	4	2	1	NA	WT(n=7)
0	0	0	5	2	1	NA	WT(n=7)
0	0	1	5	2	1	NA	WT(n=7)
0	0	1	5	2	1	NA	WT(n=7)
0	0	1	5	2	1	NA	WT(n=7)
0	0	1	5	2	2	NA	WT(n=7)
0	0	1	5	2	2	NA	WT(n=7)
0	0	1	5	2	2	NA	WT(n=7)
0	0	1	5	3	2	NA	WT(n=7)
0	0	1	5	3	2	NA	WT(n=7)
0	0	2	5	3	2	NA	WT(n=7)
0	0	2	5	3	2	NA	WT(n=7)
0	0	2	5	3	2	NA	WT(n=7)
0	0	2	5	3	3	NA	WT(n=7)
0	0	2	5	4	3	NA	WT(n=7)
0	0	2	5	4	3	NA	WT(n=7)
0	0	2	5	4	3	NA	WT(n=7)
0	0	2	6	4	3	NA	WT(n=7)
0	0	2	6	4	NA	NA	WT(n=7)
0	0	2	6	4	NA	NA	WT(n=7)
0	0	2	6	5	NA	NA	WT(n=7)
0	0	2	6	5	NA	NA	WT(n=7)
0	0	3	7	6	NA	NA	WT(n=7)
0	0	3	7	6	NA	NA	WT(n=7)
0	0	3	7	6	NA	NA	WT(n=7)
0	0	3	7	17	NA	NA	WT(n=7)
0	0	3	8	17	NA	NA	WT(n=7)
0	0	4	8	18	NA	NA	WT(n=7)
0	0	4	8	NA	NA	NA	WT(n=7)
0	0	4	8	NA	NA	NA	WT(n=7)
0	0	4	8	NA	NA	NA	WT(n=7)
0	0	5	11	NA	NA	NA	WT(n=7)
0	0	5	11	NA	NA	NA	WT(n=7)
0	0	5	13	NA	NA	NA	WT(n=7)
0	0	NA	13	NA	NA	NA	WT(n=7)
0	0	NA	10	NA	NA	NA	WT(n=7)
0	0	NA	NA	NA	NA	NA	WT(n=7)
0	0	NA	NA	NA	NA	NA	WT(n=7)
0	0	NA	NA	NA	NA	NA	WT(n=7)
0	0	NA	NA	NA	NA	NA	WT(n=7)
0	0	NA	NA	NA	NA	NA	WT(n=7)
0	1	NA	NA	NA	NA	NA	WT(n=7)
0	1	NA	NA	NA	NA	NA	WT(n=7)
1	1	NA	NA	NA	NA	NA	WT(n=7)
1	2	NA	NA	NA	NA	NA	WT(n=7)
1	NA	NA	NA	NA	NA	NA	WT(n=7)
1	NA	NA	NA	NA	NA	NA	WT(n=7)
0	0	0	0	0	0	0	WT(n=7)
0	0	0	1	0	0	0	WT(n=7)
0	0	0	1	0	0	0	WT(n=7)
0	0	0	2	0	0	0	WT(n=7)
0	0	0	2	0	0	0	WT(n=7)
0	0	0	2	0	0	0	WT(n=7)
0	0	0	2	0	0	0	WT(n=7)
0	0	0	2	0	0	0	WT(n=7)
0	0	0	2	0	0	0	WT(n=7)
0	0	0	2	0	0	0	WT(n=7)
0	0	0	3	0	0	0	WT(n=7)
0	0	0	3	0	0	0	WT(n=7)
0	0	0	3	1	0	0	WT(n=7)
0	0	0	3	1	0	0	WT(n=7)
0	0	1	3	1	0	0	WT(n=7)
0	0	1	3	1	0	0	WT(n=7)
0	0	1	3	1	0	0	WT(n=7)
0	0	1	3	1	0	0	WT(n=7)
0	0	1	3	1	0	0	WT(n=7)
0	0	1	3	1	0	0	WT(n=7)
0	0	1	3	1	0	0	WT(n=7)
0	0	1	4	1	0	0	WT(n=7)
0	0	1	4	1	0	0	WT(n=7)
0	0	1	4	1	1	NA	WT(n=7)
0	0	1	4	1	1	NA	WT(n=7)
0	0	1	4	1	1	NA	WT(n=7)
0	0	1	4	1	1	NA	WT(n=7)
0	0	1	4	1	1	NA	WT(n=7)
0	0	2	4	1	2	NA	WT(n=7)
0	0	2	5	2	2	NA	WT(n=7)
0	0	2	5	2	2	NA	WT(n=7)
0	0	2	5	2	NA	NA	WT(n=7)
0	0	2	5	2	NA	NA	WT(n=7)
0	0	2	5	2	NA	NA	WT(n=7)
0	0	2	5	2	NA	NA	WT(n=7)
0	0	2	5	2	NA	NA	WT(n=7)
0	0	2	5	3	NA	NA	WT(n=7)
0	0	3	5	3	NA	NA	WT(n=7)
0	0	3	5	3	NA	NA	WT(n=7)
0	0	3	5	3	NA	NA	WT(n=7)
0	0	3	5	3	NA	NA	WT(n=7)
0	0	3	5	3	NA	NA	WT(n=7)
0	0	3	5	3	NA	NA	WT(n=7)
0	0	3	5	4	NA	NA	WT(n=7)
0	0	3	6	4	NA	NA	WT(n=7)
0	0	3	6	5	NA	NA	WT(n=7)
0	0	3	6	5	NA	NA	WT(n=7)
0	0	3	6	6	NA	NA	WT(n=7)
0	0	3	6	10	NA	NA	WT(n=7)
1	0	4	6	10	NA	NA	WT(n=7)
1	0	4	6	11	NA	NA	WT(n=7)
NA	0	4	6	NA	NA	NA	WT(n=7)
NA	0	4	6	NA	NA	NA	WT(n=7)
NA	0	4	6	NA	NA	NA	WT(n=7)
NA	0	5	7	NA	NA	NA	WT(n=7)
NA	0	5	7	NA	NA	NA	WT(n=7)
NA	0	5	7	NA	NA	NA	WT(n=7)
NA	0	5	9	NA	NA	NA	WT(n=7)
NA	0	6	9	NA	NA	NA	WT(n=7)
NA	0	7	10	NA	NA	NA	WT(n=7)
NA	0	7	10	NA	NA	NA	WT(n=7)
NA	0	7	14	NA	NA	NA	WT(n=7)
NA	0	7	16	NA	NA	NA	WT(n=7)
NA	0	8	17	NA	NA	NA	WT(n=7)
NA	0	NA	NA	NA	NA	NA	WT(n=7)
NA	0	NA	NA	NA	NA	NA	WT(n=7)
NA	0	NA	NA	NA	NA	NA	WT(n=7)
NA	0	NA	NA	NA	NA	NA	WT(n=7)
NA	0	NA	NA	NA	NA	NA	WT(n=7)
NA	0	NA	NA	NA	NA	NA	WT(n=7)
NA	1	NA	NA	NA	NA	NA	WT(n=7)
NA	1	NA	NA	NA	NA	NA	WT(n=7)
0	0	0	5	10	0	0	WT(n=7)
0	0	0	3	5	2	0	WT(n=7)
0	0	1	3	4	2	0	WT(n=7)
0	0	2	4	7	1	1	WT(n=7)
1	0	0	7	4	2	3	WT(n=7)
0	0	1	5	6	3	0	WT(n=7)
0	0	0	5	5	0	0	WT(n=7)
0	0	0	7	8	2	0	WT(n=7)
0	0	0	4	8	0	0	WT(n=7)
0	0	0	1	8	2	0	WT(n=7)
0	0	2	3	8	3	1	WT(n=7)
0	0	0	6	2	2	1	WT(n=7)
1	0	0	3	9	3	1	WT(n=7)
0	0	0	6	5	2	0	WT(n=7)
0	0	0	5	4	5	0	WT(n=7)
0	0	0	4	6	3	0	WT(n=7)
0	0	0	7	3	4	0	WT(n=7)
0	0	0	5	3	1	1	WT(n=7)
0	0	1	3	2	2	1	WT(n=7)
0	0	0	0	10	2	0	WT(n=7)
0	0	0	1	4	2	0	WT(n=7)
1	0	0	5	6	1	0	WT(n=7)
0	0	0	1	6	2	0	WT(n=7)
0	0	0	0	11	8	0	WT(n=7)
0	0	1	4	4	2	3	WT(n=7)
0	0	0	4	7	7	0	WT(n=7)
0	0	0	7	8	5	0	WT(n=7)
0	0	0	5	7	4	3	WT(n=7)
0	0	0	2	7	10	3	WT(n=7)
0	0	0	3	9	5	0	WT(n=7)
2	0	0	3	6	5	0	WT(n=7)
0	0	1	6	8	4	1	WT(n=7)
0	0	0	1	6	3	0	WT(n=7)
0	0	0	0	6	6	1	WT(n=7)
0	0	0	1	3	9	3	WT(n=7)
0	0	0	0	4	3	2	WT(n=7)
0	0	0	0	6	3	1	WT(n=7)
0	0	0	0	7	2	4	WT(n=7)
0	0	0	1	7	6	1	WT(n=7)
0	0	1	0	4	2	0	WT(n=7)
0	0	0	0	5	2	1	WT(n=7)
0	0	0	2	6	3	2	WT(n=7)
0	0	0	2	3	5	1	WT(n=7)
0	0	1	3	4	0	1	WT(n=7)
0	1	0	4	6	7	8	WT(n=7)
0	1	0	2	7	2	1	WT(n=7)
0	0	0	5	6	3	4	WT(n=7)
0	0	0	2	6	3	0	WT(n=7)
0	1	0	10	13	6	0	WT(n=7)
1	0	0	8	7	2	0	WT(n=7)
0	0	1	5	9	5	1	WT(n=7)
0	0	0	8	8	0	0	WT(n=7)
0	0	1	7	9	2	2	WT(n=7)
0	0	1	7	11	5	2	WT(n=7)
0	0	1	6	5	8	1	WT(n=7)
0	0	1	5	3	8	0	WT(n=7)
0	0	0	1	6	5	0	WT(n=7)
0	0	1	4	9	2	2	WT(n=7)
0	0	0	4	12	8	2	WT(n=7)
0	0	1	6	5	3	2	WT(n=7)
0	0	0	5	5	6	3	WT(n=7)
0	0	2	6	6	5	0	WT(n=7)
0	0	0	4	9	3	0	WT(n=7)
0	0	1	3	9	5	0	WT(n=7)
0	2	3	1	7	12	0	WT(n=7)
0	1	0	5	12	5	0	WT(n=7)
0	0	0	5	6	4	1	WT(n=7)
1	0	1	7	6	8	0	WT(n=7)
0	0	0	4	6	6	1	WT(n=7)
0	0	0	5	8	6	1	WT(n=7)
1	1	1	6	6	6	0	WT(n=7)
0	0	0	7	3	6	0	WT(n=7)
0	0	0	5	4	2	0	WT(n=7)
0	0	0	5	8	2	0	WT(n=7)
0	1	0	6	9	1	0	WT(n=7)
0	1	0	0	5	1	0	WT(n=7)
0	1	1	0	5	6	1	WT(n=7)
0	0	0	0	5	7	1	WT(n=7)
0	0	0	0	7	3	0	WT(n=7)
0	0	1	0	6	7	0	WT(n=7)
0	0	0	1	1	4	0	WT(n=7)
0	1	0	1	3	3	1	WT(n=7)
0	1	2	7	2	3	0	WT(n=7)
0	0	0	1	1	4	0	WT(n=7)
0	1	1	0	1	3	0	WT(n=7)
0	0	0	0	4	4	0	WT(n=7)
0	0	0	2	7	1	0	WT(n=7)
0	1	0	0	5	4	6	WT(n=7)
0	0	0	0	5	2	3	WT(n=7)
0	0	1	0	2	2	0	WT(n=7)
0	0	1	0	0	2	0	WT(n=7)
0	0	0	1	0	2	0	WT(n=7)
0	0	0	0	4	3	0	WT(n=7)
0	0	0	0	2	4	0	WT(n=7)
0	0	0	0	0	0	0	WT(n=7)
0	0	1	0	11	3	3	WT(n=7)
1	0	0	0	3	8	4	WT(n=7)
0	0	1	0	2	6	0	WT(n=7)
0	0	0	0	7	4	0	WT(n=7)
0	0	0	0	4	4	0	WT(n=7)
0	0	0	0	5	1	0	WT(n=7)
0	0	1	0	7	6	0	WT(n=7)
0	0	2	1	1	6	0	WT(n=7)
0	0	0	1	0	6	0	WT(n=7)
0	0	0	0	5	1	0	WT(n=7)
0	0	0	0	3	0	0	WT(n=7)
0	1	0	0	1	0	0	WT(n=7)
1	0	0	2	3	2	0	WT(n=7)
0	0	0	3	3	3	1	WT(n=7)
1	0	0	0	3	4	0	WT(n=7)
0	0	0	0	2	4	0	WT(n=7)
0	2	0	1	0	6	2	WT(n=7)
1	1	0	2	5	3	1	WT(n=7)
2	0	0	1	5	3	0	WT(n=7)
0	1	0	2	7	2	1	WT(n=7)
0	0	0	2	6	4	0	WT(n=7)
0	0	0	1	2	6	0	WT(n=7)
0	1	0	1	3	6	1	WT(n=7)
0	0	0	1	2	4	0	WT(n=7)
0	0	0	1	6	2	0	WT(n=7)
0	0	0	3	4	1	0	WT(n=7)
0	0	0	3	4	5	0	WT(n=7)
1	0	0	4	2	5	0	WT(n=7)
0	0	0	4	1	10	0	WT(n=7)
0	0	0	1	3	9	0	WT(n=7)
0	0	0	1	1	4	0	WT(n=7)
0	0	0	4	2	3	0	WT(n=7)
0	0	0	3	3	3	0	WT(n=7)
0	0	0	0	3	3	0	WT(n=7)
1	0	0	1	3	4	0	WT(n=7)
1	1	0	0	2	3	1	WT(n=7)
0	0	1	0	6	2	0	WT(n=7)
0	0	1	0	2	3	0	WT(n=7)
0	0	1	0	5	0	0	WT(n=7)
0	0	1	0	2	0	0	WT(n=7)
0	0	2	1	6	2	0	WT(n=7)
0	1	1	0	1	4	1	WT(n=7)
2	0	1	0	6	2	0	WT(n=7)
0	1	1	0	4	1	1	WT(n=7)
1	0	1	1	7	3	0	WT(n=7)
0	0	1	0	0	1	0	WT(n=7)
0	1	1	2	8	2	1	WT(n=7)
1	0	2	1	9	2	0	WT(n=7)
0	0	0	0	5	4	0	WT(n=7)
0	0	0	2	5	1	0	WT(n=7)
0	0	0	0	5	1	0	WT(n=7)
0	0	0	1	0	1	0	WT(n=7)
1	0	0	2	3	NA	0	WT(n=7)
0	0	0	3	5	NA	0	WT(n=7)
0	0	0	1	7	NA	0	WT(n=7)
0	0	0	1	6	NA	0	WT(n=7)
0	0	0	0	7	NA	0	WT(n=7)
0	0	0	1	2	NA	0	WT(n=7)
0	2	0	1	5	NA	2	WT(n=7)
0	0	0	5	8	NA	0	WT(n=7)
0	0	0	2	3	NA	0	WT(n=7)
0	0	0	2	4	NA	0	WT(n=7)
0	0	0	2	5	NA	0	WT(n=7)
0	0	0	1	6	NA	0	WT(n=7)
0	0	0	0	8	NA	0	WT(n=7)
1	0	0	4	6	NA	0	WT(n=7)
0	0	0	5	6	NA	0	WT(n=7)
1	0	0	2	8	NA	0	WT(n=7)
0	0	0	1	4	NA	0	WT(n=7)
0	0	0	1	9	NA	0	WT(n=7)
0	1	0	7	7	NA	1	WT(n=7)
0	1	0	4	4	NA	1	WT(n=7)
0	1	0	2	5	NA	1	WT(n=7)
0	1	0	NA	5	NA	1	WT(n=7)
0	1	0	NA	6	NA	1	WT(n=7)
0	1	0	NA	4	NA	1	WT(n=7)
0	1	0	NA	6	NA	1	WT(n=7)
0	2	0	NA	NA	NA	2	WT(n=7)
0	1	0	NA	NA	NA	1	WT(n=7)
0	1	NA	NA	NA	NA	1	WT(n=7)
1	0	NA	NA	NA	NA	0	WT(n=7)
1	0	NA	NA	NA	NA	0	WT(n=7)
2	0	NA	NA	NA	NA	0	WT(n=7)
2	0	NA	NA	NA	NA	0	WT(n=7)
1	0	NA	NA	NA	NA	0	WT(n=7)
1	0	NA	NA	NA	NA	0	WT(n=7)
1	0	NA	NA	NA	NA	0	WT(n=7)
1	0	NA	NA	NA	NA	0	WT(n=7)
1	0	NA	NA	NA	NA	0	WT(n=7)
1	0	NA	NA	NA	NA	0	WT(n=7)
1	0	NA	NA	NA	NA	0	WT(n=7)
0	0	NA	NA	NA	NA	0	WT(n=7)
0	0	NA	NA	NA	NA	0	WT(n=7)
0	0	NA	NA	NA	NA	0	WT(n=7)
0	0	NA	NA	NA	NA	0	WT(n=7)
0	0	NA	NA	NA	NA	0	WT(n=7)
0	0	NA	NA	NA	NA	0	WT(n=7)
0	0	NA	NA	NA	NA	0	WT(n=7)
0	0	NA	NA	NA	NA	0	WT(n=7)
0	0	NA	NA	NA	NA	0	WT(n=7)
0	0	NA	NA	NA	NA	0	WT(n=7)
0	0	NA	NA	NA	NA	0	WT(n=7)
0	0	NA	NA	NA	NA	0	WT(n=7)
0	0	NA	NA	NA	NA	0	WT(n=7)
0	0	NA	NA	NA	NA	0	WT(n=7)
0	0	NA	NA	NA	NA	0	WT(n=7)
0	0	NA	NA	NA	NA	0	WT(n=7)
0	0	NA	NA	NA	NA	0	WT(n=7)
0	0	NA	NA	NA	NA	0	WT(n=7)
0	0	NA	NA	NA	NA	0	WT(n=7)
0	0	NA	NA	NA	NA	0	WT(n=7)
0	0	NA	NA	NA	NA	0	WT(n=7)
0	0	NA	NA	NA	NA	0	WT(n=7)
0	0	NA	NA	NA	NA	0	WT(n=7)
0	0	NA	NA	NA	NA	0	WT(n=7)
0	0	NA	NA	NA	NA	0	WT(n=7)
0	0	NA	NA	NA	NA	0	WT(n=7)
0	0	NA	NA	NA	NA	0	WT(n=7)
0	0	NA	NA	NA	NA	0	WT(n=7)
0	0	NA	NA	NA	NA	0	WT(n=7)
0	0	NA	NA	NA	NA	0	WT(n=7)
0	0	NA	NA	NA	NA	0	WT(n=7)
0	0	NA	NA	NA	NA	0	WT(n=7)
0	0	NA	NA	NA	NA	0	WT(n=7)
0	0	NA	NA	NA	NA	0	WT(n=7)
0	0	NA	NA	NA	NA	0	WT(n=7)
0	0	NA	NA	NA	NA	0	WT(n=7)
0	0	NA	NA	NA	NA	0	WT(n=7)
0	0	NA	NA	NA	NA	0	WT(n=7)
0	0	NA	NA	NA	NA	0	WT(n=7)
NA	0	NA	NA	NA	NA	0	WT(n=7)
NA	0	NA	NA	NA	NA	0	WT(n=7)
NA	0	NA	NA	NA	NA	0	WT(n=7)
NA	0	NA	NA	NA	NA	0	WT(n=7)
Zone 1	Zone 2	Zone 3	Zone 4	Zone 5	Zone 6	Zone 7	Genotype
0	0	1	0	0	0	0	pph-4.1 (n=7)
0	0	0	0	0	1	1	pph-4.1 (n=7)
0	0	0	0	0	0	0	pph-4.1 (n=7)
1	0	0	0	0	1	0	pph-4.1 (n=7)
0	0	0	0	0	0	0	pph-4.1 (n=7)
0	0	0	0	0	0	0	pph-4.1 (n=7)
1	0	0	0	0	2	1	pph-4.1 (n=7)
1	0	1	0	0	3	0	pph-4.1 (n=7)
0	0	0	0	1	4	0	pph-4.1 (n=7)
0	0	2	0	0	0	1	pph-4.1 (n=7)
0	0	0	0	0	0	2	pph-4.1 (n=7)
0	0	0	0	0	0	1	pph-4.1 (n=7)
0	1	0	1	0	0	4	pph-4.1 (n=7)
0	1	1	0	0	1	0	pph-4.1 (n=7)
1	0	0	0	0	2	0	pph-4.1 (n=7)
0	1	0	0	0	1	0	pph-4.1 (n=7)
0	2	0	0	0	1	0	pph-4.1 (n=7)
0	1	0	0	0	0	0	pph-4.1 (n=7)
1	0	0	0	0	0	0	pph-4.1 (n=7)
1	0	0	0	0	1	0	pph-4.1 (n=7)
0	0	0	0	1	0	0	pph-4.1 (n=7)
0	0	0	0	1	2	0	pph-4.1 (n=7)
0	0	0	0	2	2	1	pph-4.1 (n=7)
0	0	0	0	0	0	3	pph-4.1 (n=7)
0	0	0	0	0	2	1	pph-4.1 (n=7)
0	0	0	0	0	1	0	pph-4.1 (n=7)
0	0	0	0	0	0	0	pph-4.1 (n=7)
0	0	1	0	1	0	0	pph-4.1 (n=7)
0	0	0	0	1	0	0	pph-4.1 (n=7)
0	1	0	0	0	0	0	pph-4.1 (n=7)
0	0	0	0	0	0	0	pph-4.1 (n=7)
0	0	0	0	0	0	0	pph-4.1 (n=7)
0	0	0	0	1	0	0	pph-4.1 (n=7)
0	0	0	0	0	0	0	pph-4.1 (n=7)
0	1	0	0	0	0	0	pph-4.1 (n=7)
0	0	0	0	1	0	0	pph-4.1 (n=7)
2	0	0	0	0	4	0	pph-4.1 (n=7)
0	0	1	0	0	2	0	pph-4.1 (n=7)
0	0	0	0	0	0	0	pph-4.1 (n=7)
0	0	0	0	0	4	0	pph-4.1 (n=7)
0	0	0	0	0	2	0	pph-4.1 (n=7)
0	0	0	0	0	7	0	pph-4.1 (n=7)
0	0	0	0	1	3	0	pph-4.1 (n=7)
1	0	0	0	0	3	0	pph-4.1 (n=7)
1	0	0	0	0	0	0	pph-4.1 (n=7)
0	0	0	0	2	0	0	pph-4.1 (n=7)
0	0	0	0	0	1	0	pph-4.1 (n=7)
0	0	0	0	0	1	0	pph-4.1 (n=7)
1	0	0	0	0	4	0	pph-4.1 (n=7)
1	1	0	0	1	2	0	pph-4.1 (n=7)
0	0	1	0	1	0	0	pph-4.1 (n=7)
0	0	0	0	0	0	4	pph-4.1 (n=7)
0	0	0	1	3	0	0	pph-4.1 (n=7)
0	0	1	0	1	2	0	pph-4.1 (n=7)
0	0	0	0	0	0	0	pph-4.1 (n=7)
0	0	0	0	0	0	0	pph-4.1 (n=7)
1	0	3	0	3	0	0	pph-4.1 (n=7)
1	0	0	0	0	2	0	pph-4.1 (n=7)
0	0	0	0	2	1	1	pph-4.1 (n=7)
0	1	0	0	2	0	0	pph-4.1 (n=7)
0	1	0	0	2	1	0	pph-4.1 (n=7)
0	0	0	0	1	1	0	pph-4.1 (n=7)
0	0	0	0	1	2	0	pph-4.1 (n=7)
0	0	0	0	0	0	0	pph-4.1 (n=7)
0	0	0	0	0	0	0	pph-4.1 (n=7)
0	0	0	0	3	4	0	pph-4.1 (n=7)
0	0	0	1	1	6	0	pph-4.1 (n=7)
0	0	1	0	0	0	0	pph-4.1 (n=7)
0	0	0	0	0	2	0	pph-4.1 (n=7)
0	0	0	1	0	2	0	pph-4.1 (n=7)
0	1	0	0	0	2	2	pph-4.1 (n=7)
0	0	0	0	0	2	1	pph-4.1 (n=7)
0	1	0	0	0	3	4	pph-4.1 (n=7)
0	0	0	0	1	0	2	pph-4.1 (n=7)
0	0	0	0	0	0	3	pph-4.1 (n=7)
0	0	0	0	0	4	1	pph-4.1 (n=7)
0	2	0	0	1	0	1	pph-4.1 (n=7)
0	0	0	0	1	5	0	pph-4.1 (n=7)
0	0	0	0	2	4	0	pph-4.1 (n=7)
0	1	0	0	1	1	0	pph-4.1 (n=7)
0	0	0	0	0	0	0	pph-4.1 (n=7)
0	0	0	0	0	0	0	pph-4.1 (n=7)
0	0	0	0	0	0	0	pph-4.1 (n=7)
0	0	0	0	0	4	0	pph-4.1 (n=7)
0	0	0	0	0	0	0	pph-4.1 (n=7)
0	1	0	0	0	1	0	pph-4.1 (n=7)
0	1	1	0	0	0	0	pph-4.1 (n=7)
0	0	0	0	0	1	0	pph-4.1 (n=7)
0	0	0	0	0	0	0	pph-4.1 (n=7)
0	0	0	0	0	2	0	pph-4.1 (n=7)
0	1	0	0	0	0	0	pph-4.1 (n=7)
0	0	0	0	0	0	0	pph-4.1 (n=7)
0	1	0	0	0	2	0	pph-4.1 (n=7)
0	1	0	0	0	2	0	pph-4.1 (n=7)
0	0	0	0	0	0	0	pph-4.1 (n=7)
0	0	0	0	0	0	0	pph-4.1 (n=7)
0	0	0	0	0	2	5	pph-4.1 (n=7)
0	0	0	0	0	2	0	pph-4.1 (n=7)
0	0	0	0	0	2	0	pph-4.1 (n=7)
0	0	0	0	0	0	0	pph-4.1 (n=7)
0	0	0	0	0	1	1	pph-4.1 (n=7)
0	0	0	0	0	0	0	pph-4.1 (n=7)
0	0	0	0	0	4	2	pph-4.1 (n=7)
0	0	0	0	0	0	0	pph-4.1 (n=7)
0	0	0	0	0	0	1	pph-4.1 (n=7)
1	3	0	0	0	1	0	pph-4.1 (n=7)
0	0	0	0	0	0	0	pph-4.1 (n=7)
0	1	0	0	0	0	0	pph-4.1 (n=7)
0	0	0	0	0	1	0	pph-4.1 (n=7)
0	0	0	0	0	1	0	pph-4.1 (n=7)
0	1	0	0	0	1	0	pph-4.1 (n=7)
0	0	0	0	0	1	0	pph-4.1 (n=7)
0	0	0	0	0	2	0	pph-4.1 (n=7)
0	0	0	0	0	3	1	pph-4.1 (n=7)
0	0	0	0	1	4	1	pph-4.1 (n=7)
3	0	0	0	3	1	2	pph-4.1 (n=7)
0	0	0	0	0	1	2	pph-4.1 (n=7)
1	1	0	0	0	1	0	pph-4.1 (n=7)
0	0	0	0	2	3	0	pph-4.1 (n=7)
0	0	0	0	0	3	0	pph-4.1 (n=7)
0	0	0	0	0	2	0	pph-4.1 (n=7)
0	0	1	0	4	1	0	pph-4.1 (n=7)
0	0	1	0	3	4	0	pph-4.1 (n=7)
0	2	0	0	1	3	0	pph-4.1 (n=7)
0	0	0	0	4	0	0	pph-4.1 (n=7)
1	0	0	1	0	0	0	pph-4.1 (n=7)
1	0	0	1	1	0	0	pph-4.1 (n=7)
0	1	0	1	1	0	0	pph-4.1 (n=7)
1	0	0	1	1	0	0	pph-4.1 (n=7)
1	0	0	1	2	0	0	pph-4.1 (n=7)
1	0	0	3	1	0	0	pph-4.1 (n=7)
0	0	0	2	2	0	0	pph-4.1 (n=7)
0	0	0	0	2	0	0	pph-4.1 (n=7)
0	0	0	0	1	0	0	pph-4.1 (n=7)
1	0	0	0	1	0	0	pph-4.1 (n=7)
1	0	0	0	0	3	0	pph-4.1 (n=7)
3	1	0	0	0	1	0	pph-4.1 (n=7)
0	0	0	0	0	3	NA	pph-4.1 (n=7)
0	1	0	0	0	6	NA	pph-4.1 (n=7)
2	0	0	0	0	3	NA	pph-4.1 (n=7)
0	0	0	0	0	7	NA	pph-4.1 (n=7)
1	0	0	0	0	3	NA	pph-4.1 (n=7)
1	0	0	0	0	6	NA	pph-4.1 (n=7)
1	0	0	0	0	3	NA	pph-4.1 (n=7)
0	0	0	0	0	0	NA	pph-4.1 (n=7)
1	2	0	0	0	2	NA	pph-4.1 (n=7)
0	0	0	0	0	5	NA	pph-4.1 (n=7)
0	0	0	0	0	0	NA	pph-4.1 (n=7)
1	0	0	0	0	2	NA	pph-4.1 (n=7)
0	0	0	0	0	1	NA	pph-4.1 (n=7)
0	2	0	0	0	0	NA	pph-4.1 (n=7)
0	0	0	0	0	0	NA	pph-4.1 (n=7)
0	0	0	0	0	5	NA	pph-4.1 (n=7)
0	0	0	0	0	3	NA	pph-4.1 (n=7)
0	0	0	0	0	13	NA	pph-4.1 (n=7)
1	0	0	0	0	6	NA	pph-4.1 (n=7)
2	0	0	0	0	0	NA	pph-4.1 (n=7)
2	0	0	0	0	0	NA	pph-4.1 (n=7)
0	0	0	0	1	0	NA	pph-4.1 (n=7)
0	1	0	0	1	2	NA	pph-4.1 (n=7)
0	1	0	0	1	4	NA	pph-4.1 (n=7)
0	2	0	0	1	0	NA	pph-4.1 (n=7)
0	1	0	0	2	0	NA	pph-4.1 (n=7)
0	1	0	0	3	1	NA	pph-4.1 (n=7)
0	1	0	0	0	1	NA	pph-4.1 (n=7)
0	1	1	0	0	1	NA	pph-4.1 (n=7)
0	0	1	0	0	5	NA	pph-4.1 (n=7)
0	0	0	1	0	2	NA	pph-4.1 (n=7)
0	0	0	0	0	5	NA	pph-4.1 (n=7)
0	0	0	0	0	2	NA	pph-4.1 (n=7)
0	0	0	0	0	1	NA	pph-4.1 (n=7)
0	0	0	0	0	2	NA	pph-4.1 (n=7)
0	0	0	0	0	7	NA	pph-4.1 (n=7)
0	0	0	0	0	4	NA	pph-4.1 (n=7)
0	0	0	0	0	1	NA	pph-4.1 (n=7)
0	0	0	0	0	6	NA	pph-4.1 (n=7)
0	0	0	0	0	4	NA	pph-4.1 (n=7)
0	0	0	0	0	2	NA	pph-4.1 (n=7)
0	0	0	0	0	5	NA	pph-4.1 (n=7)
0	0	0	0	0	1	NA	pph-4.1 (n=7)
1	0	0	0	0	1	NA	pph-4.1 (n=7)
1	0	0	0	0	0	NA	pph-4.1 (n=7)
1	0	0	0	0	0	NA	pph-4.1 (n=7)
3	0	0	0	1	0	NA	pph-4.1 (n=7)
1	0	0	0	1	0	NA	pph-4.1 (n=7)
1	0	0	0	1	0	NA	pph-4.1 (n=7)
1	0	0	0	1	0	NA	pph-4.1 (n=7)
0	0	0	0	1	0	NA	pph-4.1 (n=7)
0	0	0	0	3	0	NA	pph-4.1 (n=7)
0	0	0	0	2	0	NA	pph-4.1 (n=7)
0	0	0	0	3	0	NA	pph-4.1 (n=7)
0	0	0	0	4	0	NA	pph-4.1 (n=7)
0	0	0	0	2	0	NA	pph-4.1 (n=7)
0	1	1	1	1	0	NA	pph-4.1 (n=7)
0	1	1	1	2	0	NA	pph-4.1 (n=7)
0	1	2	1	4	0	NA	pph-4.1 (n=7)
0	2	0	1	1	0	NA	pph-4.1 (n=7)
0	2	0	0	1	0	NA	pph-4.1 (n=7)
0	1	0	0	1	0	NA	pph-4.1 (n=7)
0	0	0	0	1	0	NA	pph-4.1 (n=7)
0	0	0	0	1	0	NA	pph-4.1 (n=7)
0	0	0	0	2	0	NA	pph-4.1 (n=7)
0	0	0	0	1	0	NA	pph-4.1 (n=7)
0	0	0	0	0	0	NA	pph-4.1 (n=7)
0	0	0	0	0	0	NA	pph-4.1 (n=7)
0	0	0	0	0	0	NA	pph-4.1 (n=7)
0	0	0	0	0	NA	NA	pph-4.1 (n=7)
0	0	0	0	0	NA	NA	pph-4.1 (n=7)
0	0	0	0	0	NA	NA	pph-4.1 (n=7)
0	0	0	0	0	NA	NA	pph-4.1 (n=7)
0	0	0	0	0	NA	NA	pph-4.1 (n=7)
0	0	0	0	0	NA	NA	pph-4.1 (n=7)
0	0	0	0	0	NA	NA	pph-4.1 (n=7)
0	0	0	0	0	NA	NA	pph-4.1 (n=7)
0	0	0	0	0	NA	NA	pph-4.1 (n=7)
0	0	0	0	0	NA	NA	pph-4.1 (n=7)
0	0	0	0	0	NA	NA	pph-4.1 (n=7)
0	0	0	0	0	NA	NA	pph-4.1 (n=7)
0	0	0	0	0	NA	NA	pph-4.1 (n=7)
0	0	0	0	0	NA	NA	pph-4.1 (n=7)
0	0	0	0	0	NA	NA	pph-4.1 (n=7)
0	0	0	0	0	NA	NA	pph-4.1 (n=7)
0	0	0	0	0	NA	NA	pph-4.1 (n=7)
0	0	0	0	0	NA	NA	pph-4.1 (n=7)
0	0	0	0	0	NA	NA	pph-4.1 (n=7)
0	0	0	0	0	NA	NA	pph-4.1 (n=7)
0	0	0	0	0	NA	NA	pph-4.1 (n=7)
0	0	0	0	0	NA	NA	pph-4.1 (n=7)
0	0	0	0	0	NA	NA	pph-4.1 (n=7)
0	0	0	0	0	NA	NA	pph-4.1 (n=7)
0	0	0	0	0	NA	NA	pph-4.1 (n=7)
0	0	0	0	0	NA	NA	pph-4.1 (n=7)
NA	0	0	0	NA	NA	NA	pph-4.1 (n=7)
NA	0	0	0	NA	NA	NA	pph-4.1 (n=7)
NA	0	0	0	NA	NA	NA	pph-4.1 (n=7)
NA	0	0	0	NA	NA	NA	pph-4.1 (n=7)
NA	0	0	0	NA	NA	NA	pph-4.1 (n=7)
NA	0	0	0	NA	NA	NA	pph-4.1 (n=7)
NA	0	NA	0	NA	NA	NA	pph-4.1 (n=7)
NA	0	NA	0	NA	NA	NA	pph-4.1 (n=7)
NA	0	NA	0	NA	NA	NA	pph-4.1 (n=7)
NA	0	NA	0	NA	NA	NA	pph-4.1 (n=7)
NA	0	NA	0	NA	NA	NA	pph-4.1 (n=7)
NA	0	NA	0	NA	NA	NA	pph-4.1 (n=7)
NA	0	NA	0	NA	NA	NA	pph-4.1 (n=7)
NA	NA	NA	0	NA	NA	NA	pph-4.1 (n=7)
0	0	0	0	0	0	0	pph-4.1 (n=7)
0	0	0	0	0	0	0	pph-4.1 (n=7)
0	0	0	0	0	0	0	pph-4.1 (n=7)
0	0	0	0	0	0	0	pph-4.1 (n=7)
0	0	0	0	0	0	0	pph-4.1 (n=7)
0	0	0	0	0	0	0	pph-4.1 (n=7)
0	0	0	0	0	0	0	pph-4.1 (n=7)
0	0	0	0	0	0	0	pph-4.1 (n=7)
0	0	0	0	0	0	0	pph-4.1 (n=7)
0	0	0	0	0	0	0	pph-4.1 (n=7)
0	0	0	0	0	0	0	pph-4.1 (n=7)
0	0	0	0	0	0	0	pph-4.1 (n=7)
0	0	0	0	0	0	0	pph-4.1 (n=7)
0	0	0	0	0	0	0	pph-4.1 (n=7)
0	0	0	0	0	0	0	pph-4.1 (n=7)
0	0	0	0	0	0	0	pph-4.1 (n=7)
0	0	0	0	0	0	0	pph-4.1 (n=7)
0	0	0	0	0	0	0	pph-4.1 (n=7)
0	0	0	0	0	0	NA	pph-4.1 (n=7)
0	0	0	0	0	0	NA	pph-4.1 (n=7)
0	0	0	0	0	0	NA	pph-4.1 (n=7)
0	0	0	0	0	0	NA	pph-4.1 (n=7)
0	0	0	0	0	0	NA	pph-4.1 (n=7)
0	0	0	0	0	0	NA	pph-4.1 (n=7)
0	0	0	0	0	0	NA	pph-4.1 (n=7)
0	0	0	0	0	0	NA	pph-4.1 (n=7)
0	0	0	0	0	0	NA	pph-4.1 (n=7)
0	0	0	0	0	1	NA	pph-4.1 (n=7)
0	0	0	0	0	1	NA	pph-4.1 (n=7)
0	0	0	0	0	1	NA	pph-4.1 (n=7)
0	0	0	0	1	1	NA	pph-4.1 (n=7)
0	0	0	0	1	1	NA	pph-4.1 (n=7)
0	0	0	0	1	1	NA	pph-4.1 (n=7)
0	0	0	0	1	1	NA	pph-4.1 (n=7)
0	NA	0	0	1	1	NA	pph-4.1 (n=7)
0	NA	0	0	1	1	NA	pph-4.1 (n=7)
0	NA	0	0	1	1	NA	pph-4.1 (n=7)
0	NA	0	0	1	2	NA	pph-4.1 (n=7)
0	NA	0	0	1	2	NA	pph-4.1 (n=7)
0	NA	0	0	1	2	NA	pph-4.1 (n=7)
1	NA	0	0	1	3	NA	pph-4.1 (n=7)
1	NA	0	0	1	6	NA	pph-4.1 (n=7)
1	NA	0	0	1	NA	NA	pph-4.1 (n=7)
1	NA	0	0	1	NA	NA	pph-4.1 (n=7)
1	NA	0	0	1	NA	NA	pph-4.1 (n=7)
1	NA	0	0	2	NA	NA	pph-4.1 (n=7)
1	NA	0	0	2	NA	NA	pph-4.1 (n=7)
1	NA	0	0	3	NA	NA	pph-4.1 (n=7)
1	NA	0	0	3	NA	NA	pph-4.1 (n=7)
NA	NA	0	0	3	NA	NA	pph-4.1 (n=7)
NA	NA	0	0	3	NA	NA	pph-4.1 (n=7)
NA	NA	0	0	8	NA	NA	pph-4.1 (n=7)
NA	NA	1	0	9	NA	NA	pph-4.1 (n=7)
NA	NA	NA	0	NA	NA	NA	pph-4.1 (n=7)
NA	NA	NA	0	NA	NA	NA	pph-4.1 (n=7)
NA	NA	NA	0	NA	NA	NA	pph-4.1 (n=7)
NA	NA	NA	1	NA	NA	NA	pph-4.1 (n=7)
NA	NA	NA	1	NA	NA	NA	pph-4.1 (n=7)
NA	NA	NA	1	NA	NA	NA	pph-4.1 (n=7)
NA	NA	NA	2	NA	NA	NA	pph-4.1 (n=7)
0	0	0	0	0	0	0	pph-4.1 (n=7)
0	0	0	0	0	0	0	pph-4.1 (n=7)
0	0	0	0	0	0	0	pph-4.1 (n=7)
0	0	0	0	0	0	0	pph-4.1 (n=7)
0	0	0	0	0	0	0	pph-4.1 (n=7)
0	0	0	0	0	0	0	pph-4.1 (n=7)
0	0	0	0	0	0	0	pph-4.1 (n=7)
0	0	0	0	0	0	0	pph-4.1 (n=7)
0	0	0	0	0	0	0	pph-4.1 (n=7)
0	0	0	0	0	0	0	pph-4.1 (n=7)
0	0	0	0	0	0	0	pph-4.1 (n=7)
0	0	0	0	0	0	0	pph-4.1 (n=7)
0	0	0	0	0	0	0	pph-4.1 (n=7)
0	0	0	0	0	0	0	pph-4.1 (n=7)
0	0	0	0	0	0	0	pph-4.1 (n=7)
0	0	0	0	0	0	0	pph-4.1 (n=7)
0	0	0	0	0	0	0	pph-4.1 (n=7)
0	0	0	0	0	0	0	pph-4.1 (n=7)
0	0	0	0	0	0	0	pph-4.1 (n=7)
0	0	0	0	0	0	0	pph-4.1 (n=7)
0	0	0	0	0	0	0	pph-4.1 (n=7)
0	0	0	0	0	0	0	pph-4.1 (n=7)
0	0	0	0	0	0	0	pph-4.1 (n=7)
0	0	0	0	0	0	0	pph-4.1 (n=7)
0	0	0	0	0	1	0	pph-4.1 (n=7)
0	0	0	0	0	1	0	pph-4.1 (n=7)
0	0	0	0	1	1	0	pph-4.1 (n=7)
0	0	0	0	1	1	0	pph-4.1 (n=7)
0	0	0	0	1	1	1	pph-4.1 (n=7)
0	0	0	0	1	1	1	pph-4.1 (n=7)
0	0	0	0	1	1	1	pph-4.1 (n=7)
0	0	0	0	1	1	2	pph-4.1 (n=7)
0	0	0	0	1	1	2	pph-4.1 (n=7)
0	0	0	0	1	1	NA	pph-4.1 (n=7)
0	0	0	0	1	1	NA	pph-4.1 (n=7)
0	0	0	0	1	1	NA	pph-4.1 (n=7)
0	0	0	0	1	1	NA	pph-4.1 (n=7)
0	0	0	0	1	1	NA	pph-4.1 (n=7)
0	0	0	0	2	2	NA	pph-4.1 (n=7)
0	0	0	0	2	2	NA	pph-4.1 (n=7)
0	0	0	0	2	2	NA	pph-4.1 (n=7)
0	0	0	0	3	3	NA	pph-4.1 (n=7)
0	0	0	0	NA	3	NA	pph-4.1 (n=7)
0	0	0	0	NA	4	NA	pph-4.1 (n=7)
0	0	0	0	NA	6	NA	pph-4.1 (n=7)
0	0	0	0	NA	NA	NA	pph-4.1 (n=7)
0	0	0	0	NA	NA	NA	pph-4.1 (n=7)
0	0	0	0	NA	NA	NA	pph-4.1 (n=7)
0	0	0	0	NA	NA	NA	pph-4.1 (n=7)
0	0	0	0	NA	NA	NA	pph-4.1 (n=7)
0	0	0	0	NA	NA	NA	pph-4.1 (n=7)
0	0	0	NA	NA	NA	NA	pph-4.1 (n=7)
0	0	0	NA	NA	NA	NA	pph-4.1 (n=7)
0	0	0	NA	NA	NA	NA	pph-4.1 (n=7)
0	0	0	NA	NA	NA	NA	pph-4.1 (n=7)
0	0	0	NA	NA	NA	NA	pph-4.1 (n=7)
0	0	0	NA	NA	NA	NA	pph-4.1 (n=7)
0	0	0	NA	NA	NA	NA	pph-4.1 (n=7)
0	0	0	NA	NA	NA	NA	pph-4.1 (n=7)
0	0	0	NA	NA	NA	NA	pph-4.1 (n=7)
0	0	0	NA	NA	NA	NA	pph-4.1 (n=7)
0	0	0	NA	NA	NA	NA	pph-4.1 (n=7)
0	0	0	NA	NA	NA	NA	pph-4.1 (n=7)
0	0	1	NA	NA	NA	NA	pph-4.1 (n=7)
0	0	1	NA	NA	NA	NA	pph-4.1 (n=7)
0	0	NA	NA	NA	NA	NA	pph-4.1 (n=7)
0	0	NA	NA	NA	NA	NA	pph-4.1 (n=7)
0	0	NA	NA	NA	NA	NA	pph-4.1 (n=7)
1	0	NA	NA	NA	NA	NA	pph-4.1 (n=7)
1	0	NA	NA	NA	NA	NA	pph-4.1 (n=7)
1	0	NA	NA	NA	NA	NA	pph-4.1 (n=7)
NA	0	NA	NA	NA	NA	NA	pph-4.1 (n=7)
NA	0	NA	NA	NA	NA	NA	pph-4.1 (n=7)
NA	0	NA	NA	NA	NA	NA	pph-4.1 (n=7)
NA	0	NA	NA	NA	NA	NA	pph-4.1 (n=7)
NA	0	NA	NA	NA	NA	NA	pph-4.1 (n=7)
NA	0	NA	NA	NA	NA	NA	pph-4.1 (n=7)
NA	0	NA	NA	NA	NA	NA	pph-4.1 (n=7)
NA	0	NA	NA	NA	NA	NA	pph-4.1 (n=7)
NA	0	NA	NA	NA	NA	NA	pph-4.1 (n=7)
NA	0	NA	NA	NA	NA	NA	pph-4.1 (n=7)
NA	0	NA	NA	NA	NA	NA	pph-4.1 (n=7)
NA	0	NA	NA	NA	NA	NA	pph-4.1 (n=7)
NA	0	NA	NA	NA	NA	NA	pph-4.1 (n=7)
NA	0	NA	NA	NA	NA	NA	pph-4.1 (n=7)
NA	0	NA	NA	NA	NA	NA	pph-4.1 (n=7)
NA	0	NA	NA	NA	NA	NA	pph-4.1 (n=7)
NA	0	NA	NA	NA	NA	NA	pph-4.1 (n=7)
NA	0	NA	NA	NA	NA	NA	pph-4.1 (n=7)
NA	1	NA	NA	NA	NA	NA	pph-4.1 (n=7)
0	0	0	0	0	0	0	pph-4.1 (n=7)
0	0	0	0	0	0	0	pph-4.1 (n=7)
0	0	0	0	0	0	0	pph-4.1 (n=7)
0	0	0	0	0	0	0	pph-4.1 (n=7)
0	0	0	0	0	0	0	pph-4.1 (n=7)
0	0	0	0	0	0	0	pph-4.1 (n=7)
0	0	0	0	0	0	0	pph-4.1 (n=7)
0	0	0	0	0	0	0	pph-4.1 (n=7)
0	0	0	0	0	0	0	pph-4.1 (n=7)
0	0	0	0	0	0	0	pph-4.1 (n=7)
0	0	0	0	0	0	0	pph-4.1 (n=7)
0	0	0	0	1	0	0	pph-4.1 (n=7)
0	0	0	0	1	0	0	pph-4.1 (n=7)
0	0	0	0	1	0	0	pph-4.1 (n=7)
0	0	0	0	1	0	0	pph-4.1 (n=7)
0	0	0	0	2	0	0	pph-4.1 (n=7)
0	0	0	0	2	0	0	pph-4.1 (n=7)
0	0	0	0	2	0	0	pph-4.1 (n=7)
0	0	0	0	2	0	1	pph-4.1 (n=7)
0	0	0	0	2	0	1	pph-4.1 (n=7)
0	0	0	0	3	0	NA	pph-4.1 (n=7)
0	0	0	0	3	0	NA	pph-4.1 (n=7)
0	0	0	0	3	1	NA	pph-4.1 (n=7)
0	0	0	0	4	1	NA	pph-4.1 (n=7)
0	0	0	0	5	1	NA	pph-4.1 (n=7)
0	0	0	0	7	1	NA	pph-4.1 (n=7)
0	0	0	0	8	4	NA	pph-4.1 (n=7)
0	0	0	0	9	5	NA	pph-4.1 (n=7)
0	0	0	1	NA	6	NA	pph-4.1 (n=7)
0	0	0	1	NA	NA	NA	pph-4.1 (n=7)
0	0	0	1	NA	NA	NA	pph-4.1 (n=7)
0	0	0	1	NA	NA	NA	pph-4.1 (n=7)
0	0	0	1	NA	NA	NA	pph-4.1 (n=7)
0	0	0	1	NA	NA	NA	pph-4.1 (n=7)
0	0	0	1	NA	NA	NA	pph-4.1 (n=7)
0	0	0	1	NA	NA	NA	pph-4.1 (n=7)
0	0	0	1	NA	NA	NA	pph-4.1 (n=7)
0	0	0	1	NA	NA	NA	pph-4.1 (n=7)
0	0	0	1	NA	NA	NA	pph-4.1 (n=7)
0	0	0	2	NA	NA	NA	pph-4.1 (n=7)
0	0	0	2	NA	NA	NA	pph-4.1 (n=7)
0	0	0	2	NA	NA	NA	pph-4.1 (n=7)
0	0	0	2	NA	NA	NA	pph-4.1 (n=7)
0	0	0	2	NA	NA	NA	pph-4.1 (n=7)
0	0	0	2	NA	NA	NA	pph-4.1 (n=7)
0	0	0	2	NA	NA	NA	pph-4.1 (n=7)
0	0	0	2	NA	NA	NA	pph-4.1 (n=7)
0	0	0	2	NA	NA	NA	pph-4.1 (n=7)
0	0	0	2	NA	NA	NA	pph-4.1 (n=7)
0	0	0	2	NA	NA	NA	pph-4.1 (n=7)
0	0	0	3	NA	NA	NA	pph-4.1 (n=7)
0	0	0	3	NA	NA	NA	pph-4.1 (n=7)
0	0	0	3	NA	NA	NA	pph-4.1 (n=7)
0	1	0	3	NA	NA	NA	pph-4.1 (n=7)
0	NA	0	4	NA	NA	NA	pph-4.1 (n=7)
0	NA	0	6	NA	NA	NA	pph-4.1 (n=7)
0	NA	0	NA	NA	NA	NA	pph-4.1 (n=7)
0	NA	0	NA	NA	NA	NA	pph-4.1 (n=7)
0	NA	1	NA	NA	NA	NA	pph-4.1 (n=7)
0	NA	1	NA	NA	NA	NA	pph-4.1 (n=7)
0	NA	1	NA	NA	NA	NA	pph-4.1 (n=7)
0	NA	1	NA	NA	NA	NA	pph-4.1 (n=7)
0	NA	1	NA	NA	NA	NA	pph-4.1 (n=7)
0	NA	1	NA	NA	NA	NA	pph-4.1 (n=7)
0	NA	1	NA	NA	NA	NA	pph-4.1 (n=7)
0	NA	3	NA	NA	NA	NA	pph-4.1 (n=7)
0	NA	NA	NA	NA	NA	NA	pph-4.1 (n=7)
0	NA	NA	NA	NA	NA	NA	pph-4.1 (n=7)
0	NA	NA	NA	NA	NA	NA	pph-4.1 (n=7)
0	NA	NA	NA	NA	NA	NA	pph-4.1 (n=7)
0	NA	NA	NA	NA	NA	NA	pph-4.1 (n=7)
0	NA	NA	NA	NA	NA	NA	pph-4.1 (n=7)
0	NA	NA	NA	NA	NA	NA	pph-4.1 (n=7)
0	NA	NA	NA	NA	NA	NA	pph-4.1 (n=7)
0	NA	NA	NA	NA	NA	NA	pph-4.1 (n=7)
0	NA	NA	NA	NA	NA	NA	pph-4.1 (n=7)
0	NA	NA	NA	NA	NA	NA	pph-4.1 (n=7)
0	NA	NA	NA	NA	NA	NA	pph-4.1 (n=7)
0	NA	NA	NA	NA	NA	NA	pph-4.1 (n=7)
0	NA	NA	NA	NA	NA	NA	pph-4.1 (n=7)
3	NA	NA	NA	NA	NA	NA	pph-4.1 (n=7)
Zone 1	Zone 2	Zone 3	Zone 4	Zone 5	Zone 6	Zone 7	Genotype
0	0	0	0	0	0	0	atm-1;pph-4.1 (n=4)
0	0	0	0	0	0	0	atm-1;pph-4.1 (n=4)
0	0	0	0	0	0	0	atm-1;pph-4.1 (n=4)
0	0	0	0	0	0	0	atm-1;pph-4.1 (n=4)
0	0	0	0	0	0	0	atm-1;pph-4.1 (n=4)
0	0	0	0	0	0	0	atm-1;pph-4.1 (n=4)
0	0	0	0	0	0	0	atm-1;pph-4.1 (n=4)
0	0	0	0	0	0	0	atm-1;pph-4.1 (n=4)
0	0	0	0	0	0	0	atm-1;pph-4.1 (n=4)
0	0	0	0	0	0	0	atm-1;pph-4.1 (n=4)
0	0	0	0	0	0	0	atm-1;pph-4.1 (n=4)
0	0	0	0	0	0	0	atm-1;pph-4.1 (n=4)
0	0	0	0	0	0	0	atm-1;pph-4.1 (n=4)
0	0	0	0	0	0	0	atm-1;pph-4.1 (n=4)
0	0	0	0	0	0	0	atm-1;pph-4.1 (n=4)
0	0	0	0	0	0	0	atm-1;pph-4.1 (n=4)
0	0	0	0	0	1	0	atm-1;pph-4.1 (n=4)
NA	0	0	0	0	1	NA	atm-1;pph-4.1 (n=4)
NA	0	0	0	0	1	NA	atm-1;pph-4.1 (n=4)
NA	0	0	0	0	1	NA	atm-1;pph-4.1 (n=4)
NA	0	0	0	0	2	NA	atm-1;pph-4.1 (n=4)
NA	0	0	0	0	3	NA	atm-1;pph-4.1 (n=4)
NA	0	0	1	0	3	NA	atm-1;pph-4.1 (n=4)
NA	0	0	1	0	NA	NA	atm-1;pph-4.1 (n=4)
NA	0	0	1	0	NA	NA	atm-1;pph-4.1 (n=4)
NA	0	0	1	0	NA	NA	atm-1;pph-4.1 (n=4)
NA	0	0	1	0	NA	NA	atm-1;pph-4.1 (n=4)
NA	0	0	1	0	NA	NA	atm-1;pph-4.1 (n=4)
NA	0	0	2	1	NA	NA	atm-1;pph-4.1 (n=4)
NA	0	0	2	1	NA	NA	atm-1;pph-4.1 (n=4)
NA	1	0	2	1	NA	NA	atm-1;pph-4.1 (n=4)
NA	1	1	5	2	NA	NA	atm-1;pph-4.1 (n=4)
NA	1	1	8	2	NA	NA	atm-1;pph-4.1 (n=4)
NA	2	1	NA	2	NA	NA	atm-1;pph-4.1 (n=4)
NA	2	1	NA	2	NA	NA	atm-1;pph-4.1 (n=4)
NA	NA	NA	NA	2	NA	NA	atm-1;pph-4.1 (n=4)
NA	NA	NA	NA	2	NA	NA	atm-1;pph-4.1 (n=4)
NA	NA	NA	NA	2	NA	NA	atm-1;pph-4.1 (n=4)
NA	NA	NA	NA	2	NA	NA	atm-1;pph-4.1 (n=4)
NA	NA	NA	NA	2	NA	NA	atm-1;pph-4.1 (n=4)
NA	NA	NA	NA	3	NA	NA	atm-1;pph-4.1 (n=4)
NA	NA	NA	NA	3	NA	NA	atm-1;pph-4.1 (n=4)
NA	NA	NA	NA	3	NA	NA	atm-1;pph-4.1 (n=4)
NA	NA	NA	NA	5	NA	NA	atm-1;pph-4.1 (n=4)
0	0	0	0	0	0	0	atm-1;pph-4.1 (n=4)
0	0	0	0	0	0	0	atm-1;pph-4.1 (n=4)
0	0	0	0	0	0	0	atm-1;pph-4.1 (n=4)
0	0	0	0	0	0	0	atm-1;pph-4.1 (n=4)
0	0	0	0	0	0	0	atm-1;pph-4.1 (n=4)
0	0	0	0	0	0	0	atm-1;pph-4.1 (n=4)
0	0	0	0	0	0	0	atm-1;pph-4.1 (n=4)
0	0	0	0	0	0	0	atm-1;pph-4.1 (n=4)
0	0	0	0	0	0	0	atm-1;pph-4.1 (n=4)
0	0	0	0	0	0	0	atm-1;pph-4.1 (n=4)
1	0	0	0	0	0	1	atm-1;pph-4.1 (n=4)
1	0	0	0	0	0	1	atm-1;pph-4.1 (n=4)
1	0	0	0	0	0	1	atm-1;pph-4.1 (n=4)
1	0	0	0	0	0	1	atm-1;pph-4.1 (n=4)
1	0	0	0	0	0	1	atm-1;pph-4.1 (n=4)
1	0	0	0	0	0	1	atm-1;pph-4.1 (n=4)
2	0	0	0	0	0	2	atm-1;pph-4.1 (n=4)
2	0	0	0	0	0	2	atm-1;pph-4.1 (n=4)
2	0	0	0	0	0	2	atm-1;pph-4.1 (n=4)
3	0	0	0	0	1	3	atm-1;pph-4.1 (n=4)
3	0	0	0	0	1	3	atm-1;pph-4.1 (n=4)
3	0	0	0	0	1	3	atm-1;pph-4.1 (n=4)
3	0	0	0	0	1	3	atm-1;pph-4.1 (n=4)
3	0	0	0	0	1	3	atm-1;pph-4.1 (n=4)
4	0	0	0	0	2	4	atm-1;pph-4.1 (n=4)
6	0	0	0	1	2	6	atm-1;pph-4.1 (n=4)
6	0	0	0	1	2	6	atm-1;pph-4.1 (n=4)
NA	0	0	0	1	5	NA	atm-1;pph-4.1 (n=4)
NA	0	0	0	2	6	NA	atm-1;pph-4.1 (n=4)
NA	0	0	0	4	7	NA	atm-1;pph-4.1 (n=4)
NA	0	0	0	6	7	NA	atm-1;pph-4.1 (n=4)
NA	0	0	1	NA	NA	NA	atm-1;pph-4.1 (n=4)
NA	0	0	1	NA	NA	NA	atm-1;pph-4.1 (n=4)
NA	0	0	1	NA	NA	NA	atm-1;pph-4.1 (n=4)
NA	0	0	1	NA	NA	NA	atm-1;pph-4.1 (n=4)
NA	0	0	1	NA	NA	NA	atm-1;pph-4.1 (n=4)
NA	1	0	NA	NA	NA	NA	atm-1;pph-4.1 (n=4)
NA	1	0	NA	NA	NA	NA	atm-1;pph-4.1 (n=4)
NA	1	0	NA	NA	NA	NA	atm-1;pph-4.1 (n=4)
NA	1	0	NA	NA	NA	NA	atm-1;pph-4.1 (n=4)
NA	1	1	NA	NA	NA	NA	atm-1;pph-4.1 (n=4)
NA	1	NA	NA	NA	NA	NA	atm-1;pph-4.1 (n=4)
0	0	0	0	0	0	0	atm-1;pph-4.1 (n=4)
0	0	0	0	0	0	0	atm-1;pph-4.1 (n=4)
0	0	0	0	0	0	0	atm-1;pph-4.1 (n=4)
0	0	0	0	0	0	0	atm-1;pph-4.1 (n=4)
0	0	0	0	0	0	0	atm-1;pph-4.1 (n=4)
0	0	0	0	0	0	0	atm-1;pph-4.1 (n=4)
0	0	0	0	0	0	0	atm-1;pph-4.1 (n=4)
0	0	0	0	0	0	0	atm-1;pph-4.1 (n=4)
0	0	0	0	0	0	0	atm-1;pph-4.1 (n=4)
0	0	0	0	0	0	0	atm-1;pph-4.1 (n=4)
0	0	0	0	0	0	0	atm-1;pph-4.1 (n=4)
0	0	0	0	0	0	0	atm-1;pph-4.1 (n=4)
0	0	0	0	0	0	0	atm-1;pph-4.1 (n=4)
0	0	0	0	0	0	0	atm-1;pph-4.1 (n=4)
0	0	0	0	0	0	0	atm-1;pph-4.1 (n=4)
0	0	0	0	0	0	0	atm-1;pph-4.1 (n=4)
0	0	0	0	0	0	0	atm-1;pph-4.1 (n=4)
0	0	0	0	0	0	0	atm-1;pph-4.1 (n=4)
0	0	0	0	0	0	0	atm-1;pph-4.1 (n=4)
1	0	0	0	0	1	1	atm-1;pph-4.1 (n=4)
1	0	0	0	0	1	1	atm-1;pph-4.1 (n=4)
2	0	0	0	0	1	2	atm-1;pph-4.1 (n=4)
2	0	0	0	0	1	2	atm-1;pph-4.1 (n=4)
3	0	0	0	0	1	3	atm-1;pph-4.1 (n=4)
NA	0	0	0	1	1	NA	atm-1;pph-4.1 (n=4)
NA	0	0	0	1	1	NA	atm-1;pph-4.1 (n=4)
NA	0	0	0	1	1	NA	atm-1;pph-4.1 (n=4)
NA	0	0	0	1	1	NA	atm-1;pph-4.1 (n=4)
NA	0	0	0	1	2	NA	atm-1;pph-4.1 (n=4)
NA	0	0	0	1	2	NA	atm-1;pph-4.1 (n=4)
NA	0	0	0	1	2	NA	atm-1;pph-4.1 (n=4)
NA	0	0	0	1	2	NA	atm-1;pph-4.1 (n=4)
NA	0	0	0	1	2	NA	atm-1;pph-4.1 (n=4)
NA	0	0	0	1	2	NA	atm-1;pph-4.1 (n=4)
NA	0	0	0	1	3	NA	atm-1;pph-4.1 (n=4)
NA	0	0	0	1	3	NA	atm-1;pph-4.1 (n=4)
NA	0	0	0	2	4	NA	atm-1;pph-4.1 (n=4)
NA	0	0	0	2	4	NA	atm-1;pph-4.1 (n=4)
NA	0	0	0	2	4	NA	atm-1;pph-4.1 (n=4)
NA	0	0	1	2	NA	NA	atm-1;pph-4.1 (n=4)
NA	0	0	1	2	NA	NA	atm-1;pph-4.1 (n=4)
NA	0	0	1	2	NA	NA	atm-1;pph-4.1 (n=4)
NA	0	0	1	3	NA	NA	atm-1;pph-4.1 (n=4)
NA	0	0	2	NA	NA	NA	atm-1;pph-4.1 (n=4)
NA	1	0	3	NA	NA	NA	atm-1;pph-4.1 (n=4)
NA	1	0	NA	NA	NA	NA	atm-1;pph-4.1 (n=4)
NA	1	0	NA	NA	NA	NA	atm-1;pph-4.1 (n=4)
NA	1	0	NA	NA	NA	NA	atm-1;pph-4.1 (n=4)
NA	NA	1	NA	NA	NA	NA	atm-1;pph-4.1 (n=4)
NA	NA	1	NA	NA	NA	NA	atm-1;pph-4.1 (n=4)
NA	NA	1	NA	NA	NA	NA	atm-1;pph-4.1 (n=4)
NA	NA	1	NA	NA	NA	NA	atm-1;pph-4.1 (n=4)
NA	NA	9	NA	NA	NA	NA	atm-1;pph-4.1 (n=4)
0	0	0	0	0	0	0	atm-1;pph-4.1 (n=4)
0	0	0	0	0	0	0	atm-1;pph-4.1 (n=4)
0	0	0	0	0	0	0	atm-1;pph-4.1 (n=4)
0	0	0	0	0	0	0	atm-1;pph-4.1 (n=4)
0	0	0	0	0	0	0	atm-1;pph-4.1 (n=4)
0	0	0	0	0	0	0	atm-1;pph-4.1 (n=4)
0	0	0	0	0	0	0	atm-1;pph-4.1 (n=4)
0	0	0	0	0	0	0	atm-1;pph-4.1 (n=4)
0	0	0	0	0	0	0	atm-1;pph-4.1 (n=4)
0	0	0	0	0	0	0	atm-1;pph-4.1 (n=4)
0	0	0	0	0	0	0	atm-1;pph-4.1 (n=4)
0	0	0	0	0	0	0	atm-1;pph-4.1 (n=4)
0	0	0	0	0	0	0	atm-1;pph-4.1 (n=4)
0	0	0	0	0	0	0	atm-1;pph-4.1 (n=4)
0	0	0	0	0	0	0	atm-1;pph-4.1 (n=4)
0	0	0	0	0	0	0	atm-1;pph-4.1 (n=4)
0	0	0	0	0	0	0	atm-1;pph-4.1 (n=4)
0	0	0	0	0	0	0	atm-1;pph-4.1 (n=4)
0	0	0	0	0	0	0	atm-1;pph-4.1 (n=4)
0	0	0	0	0	0	0	atm-1;pph-4.1 (n=4)
0	0	0	0	0	0	0	atm-1;pph-4.1 (n=4)
0	0	0	1	0	0	0	atm-1;pph-4.1 (n=4)
0	0	0	1	0	0	0	atm-1;pph-4.1 (n=4)
0	0	0	3	0	0	0	atm-1;pph-4.1 (n=4)
0	0	0	4	1	0	0	atm-1;pph-4.1 (n=4)
0	0	0	6	1	0	0	atm-1;pph-4.1 (n=4)
0	0	0	NA	1	0	0	atm-1;pph-4.1 (n=4)
0	1	0	NA	1	0	0	atm-1;pph-4.1 (n=4)
0	NA	0	NA	1	0	0	atm-1;pph-4.1 (n=4)
0	NA	1	NA	1	0	0	atm-1;pph-4.1 (n=4)
0	NA	1	NA	1	0	0	atm-1;pph-4.1 (n=4)
0	NA	1	NA	1	0	0	atm-1;pph-4.1 (n=4)
0	NA	1	NA	1	0	0	atm-1;pph-4.1 (n=4)
0	NA	1	NA	1	0	0	atm-1;pph-4.1 (n=4)
0	NA	2	NA	1	1	0	atm-1;pph-4.1 (n=4)
0	NA	3	NA	2	1	0	atm-1;pph-4.1 (n=4)
0	NA	3	NA	2	1	0	atm-1;pph-4.1 (n=4)
0	NA	4	NA	2	1	0	atm-1;pph-4.1 (n=4)
0	NA	NA	NA	2	1	0	atm-1;pph-4.1 (n=4)
0	NA	NA	NA	3	1	0	atm-1;pph-4.1 (n=4)
1	NA	NA	NA	3	1	1	atm-1;pph-4.1 (n=4)
1	NA	NA	NA	3	1	1	atm-1;pph-4.1 (n=4)
1	NA	NA	NA	4	2	1	atm-1;pph-4.1 (n=4)
1	NA	NA	NA	NA	2	1	atm-1;pph-4.1 (n=4)
2	NA	NA	NA	NA	2	2	atm-1;pph-4.1 (n=4)
2	NA	NA	NA	NA	2	2	atm-1;pph-4.1 (n=4)
2	NA	NA	NA	NA	2	2	atm-1;pph-4.1 (n=4)
2	NA	NA	NA	NA	3	2	atm-1;pph-4.1 (n=4)
2	NA	NA	NA	NA	3	2	atm-1;pph-4.1 (n=4)
3	NA	NA	NA	NA	4	3	atm-1;pph-4.1 (n=4)
3	NA	NA	NA	NA	4	3	atm-1;pph-4.1 (n=4)
3	NA	NA	NA	NA	4	3	atm-1;pph-4.1 (n=4)
4	NA	NA	NA	NA	4	4	atm-1;pph-4.1 (n=4)
4	NA	NA	NA	NA	4	4	atm-1;pph-4.1 (n=4)
5	NA	NA	NA	NA	4	5	atm-1;pph-4.1 (n=4)
NA	NA	NA	NA	NA	5	NA	atm-1;pph-4.1 (n=4)
NA	NA	NA	NA	NA	5	NA	atm-1;pph-4.1 (n=4)
NA	NA	NA	NA	NA	5	NA	atm-1;pph-4.1 (n=4)
NA	NA	NA	NA	NA	5	NA	atm-1;pph-4.1 (n=4)
NA	NA	NA	NA	NA	5	NA	atm-1;pph-4.1 (n=4)
NA	NA	NA	NA	NA	5	NA	atm-1;pph-4.1 (n=4)
NA	NA	NA	NA	NA	5	NA	atm-1;pph-4.1 (n=4)
NA	NA	NA	NA	NA	7	NA	atm-1;pph-4.1 (n=4)
Zone 1	Zone 2	Zone 3	Zone 4	Zone 5	Zone 6	Zone 7	Genotype
0	0	0	0	0	0	0	pph-4.1;atl-1/nT1 (n=3)
0	0	0	0	0	0	0	pph-4.1;atl-1/nT1 (n=3)
0	0	0	0	0	0	0	pph-4.1;atl-1/nT1 (n=3)
0	0	0	0	0	0	0	pph-4.1;atl-1/nT1 (n=3)
0	0	0	0	0	1	0	pph-4.1;atl-1/nT1 (n=3)
0	0	0	0	0	1	0	pph-4.1;atl-1/nT1 (n=3)
0	0	0	0	0	1	0	pph-4.1;atl-1/nT1 (n=3)
0	0	0	0	0	2	0	pph-4.1;atl-1/nT1 (n=3)
0	0	0	0	0	3	0	pph-4.1;atl-1/nT1 (n=3)
0	0	0	0	0	3	0	pph-4.1;atl-1/nT1 (n=3)
0	0	0	0	0	3	0	pph-4.1;atl-1/nT1 (n=3)
0	0	0	0	1	3	0	pph-4.1;atl-1/nT1 (n=3)
0	0	0	0	1	4	0	pph-4.1;atl-1/nT1 (n=3)
0	0	0	0	2	4	1	pph-4.1;atl-1/nT1 (n=3)
0	0	0	0	2	5	3	pph-4.1;atl-1/nT1 (n=3)
0	0	0	0	2	5	9	pph-4.1;atl-1/nT1 (n=3)
0	0	0	0	2	5	NA	pph-4.1;atl-1/nT1 (n=3)
0	0	0	0	2	6	NA	pph-4.1;atl-1/nT1 (n=3)
0	0	0	0	3	6	NA	pph-4.1;atl-1/nT1 (n=3)
0	0	0	0	3	6	NA	pph-4.1;atl-1/nT1 (n=3)
0	0	0	0	3	6	NA	pph-4.1;atl-1/nT1 (n=3)
0	0	0	0	4	7	NA	pph-4.1;atl-1/nT1 (n=3)
0	0	0	0	4	7	NA	pph-4.1;atl-1/nT1 (n=3)
0	0	1	1	4	8	NA	pph-4.1;atl-1/nT1 (n=3)
0	0	NA	1	6	9	NA	pph-4.1;atl-1/nT1 (n=3)
0	0	NA	1	6	9	NA	pph-4.1;atl-1/nT1 (n=3)
0	0	NA	1	8	9	NA	pph-4.1;atl-1/nT1 (n=3)
0	0	NA	2	NA	10	NA	pph-4.1;atl-1/nT1 (n=3)
0	0	NA	NA	NA	10	NA	pph-4.1;atl-1/nT1 (n=3)
0	NA	NA	NA	NA	10	NA	pph-4.1;atl-1/nT1 (n=3)
0	NA	NA	NA	NA	18	NA	pph-4.1;atl-1/nT1 (n=3)
0	NA	NA	NA	NA	NA	NA	pph-4.1;atl-1/nT1 (n=3)
0	NA	NA	NA	NA	NA	NA	pph-4.1;atl-1/nT1 (n=3)
0	NA	NA	NA	NA	NA	NA	pph-4.1;atl-1/nT1 (n=3)
0	NA	NA	NA	NA	NA	NA	pph-4.1;atl-1/nT1 (n=3)
0	NA	NA	NA	NA	NA	NA	pph-4.1;atl-1/nT1 (n=3)
0	NA	NA	NA	NA	NA	NA	pph-4.1;atl-1/nT1 (n=3)
0	NA	NA	NA	NA	NA	NA	pph-4.1;atl-1/nT1 (n=3)
0	NA	NA	NA	NA	NA	NA	pph-4.1;atl-1/nT1 (n=3)
0	NA	NA	NA	NA	NA	NA	pph-4.1;atl-1/nT1 (n=3)
0	NA	NA	NA	NA	NA	NA	pph-4.1;atl-1/nT1 (n=3)
0	NA	NA	NA	NA	NA	NA	pph-4.1;atl-1/nT1 (n=3)
0	NA	NA	NA	NA	NA	NA	pph-4.1;atl-1/nT1 (n=3)
1	NA	NA	NA	NA	NA	NA	pph-4.1;atl-1/nT1 (n=3)
1	NA	NA	NA	NA	NA	NA	pph-4.1;atl-1/nT1 (n=3)
1	NA	NA	NA	NA	NA	NA	pph-4.1;atl-1/nT1 (n=3)
0	0	0	0	0	0	0	pph-4.1;atl-1/nT1 (n=3)
0	0	0	0	0	0	0	pph-4.1;atl-1/nT1 (n=3)
0	0	0	0	0	2	0	pph-4.1;atl-1/nT1 (n=3)
0	0	0	0	0	2	0	pph-4.1;atl-1/nT1 (n=3)
0	0	0	0	0	3	0	pph-4.1;atl-1/nT1 (n=3)
0	0	0	0	0	3	0	pph-4.1;atl-1/nT1 (n=3)
0	0	0	0	0	3	0	pph-4.1;atl-1/nT1 (n=3)
0	0	0	0	0	4	0	pph-4.1;atl-1/nT1 (n=3)
0	0	0	0	0	4	1	pph-4.1;atl-1/nT1 (n=3)
0	0	0	0	0	4	1	pph-4.1;atl-1/nT1 (n=3)
0	0	0	0	0	6	1	pph-4.1;atl-1/nT1 (n=3)
0	0	0	0	1	6	2	pph-4.1;atl-1/nT1 (n=3)
0	0	0	0	1	6	2	pph-4.1;atl-1/nT1 (n=3)
0	0	0	0	1	6	3	pph-4.1;atl-1/nT1 (n=3)
0	0	0	0	1	7	5	pph-4.1;atl-1/nT1 (n=3)
0	0	0	0	1	8	5	pph-4.1;atl-1/nT1 (n=3)
0	0	0	0	1	9	6	pph-4.1;atl-1/nT1 (n=3)
0	0	0	0	1	9	7	pph-4.1;atl-1/nT1 (n=3)
0	0	0	0	1	9	7	pph-4.1;atl-1/nT1 (n=3)
0	0	0	0	1	11	11	pph-4.1;atl-1/nT1 (n=3)
0	0	0	0	1	11	NA	pph-4.1;atl-1/nT1 (n=3)
0	0	0	0	2	11	NA	pph-4.1;atl-1/nT1 (n=3)
0	0	0	0	2	13	NA	pph-4.1;atl-1/nT1 (n=3)
0	0	0	0	2	13	NA	pph-4.1;atl-1/nT1 (n=3)
0	0	0	0	3	15	NA	pph-4.1;atl-1/nT1 (n=3)
0	0	0	1	3	16	NA	pph-4.1;atl-1/nT1 (n=3)
0	0	0	1	3	17	NA	pph-4.1;atl-1/nT1 (n=3)
1	0	0	1	3	22	NA	pph-4.1;atl-1/nT1 (n=3)
2	0	0	1	3	29	NA	pph-4.1;atl-1/nT1 (n=3)
NA	0	0	2	4	NA	NA	pph-4.1;atl-1/nT1 (n=3)
NA	1	1	NA	4	NA	NA	pph-4.1;atl-1/nT1 (n=3)
NA	1	NA	NA	6	NA	NA	pph-4.1;atl-1/nT1 (n=3)
NA	1	NA	NA	7	NA	NA	pph-4.1;atl-1/nT1 (n=3)
0	0	0	0	0	0	0	pph-4.1;atl-1/nT1 (n=3)
0	0	0	0	0	0	0	pph-4.1;atl-1/nT1 (n=3)
0	0	0	0	0	0	0	pph-4.1;atl-1/nT1 (n=3)
0	0	0	0	0	0	0	pph-4.1;atl-1/nT1 (n=3)
0	0	0	0	0	0	0	pph-4.1;atl-1/nT1 (n=3)
0	0	0	0	0	1	0	pph-4.1;atl-1/nT1 (n=3)
0	0	0	0	0	5	1	pph-4.1;atl-1/nT1 (n=3)
0	0	0	0	0	5	2	pph-4.1;atl-1/nT1 (n=3)
0	0	0	0	0	5	6	pph-4.1;atl-1/nT1 (n=3)
0	0	0	0	1	5	6	pph-4.1;atl-1/nT1 (n=3)
0	0	0	0	1	5	11	pph-4.1;atl-1/nT1 (n=3)
0	0	0	0	1	6	11	pph-4.1;atl-1/nT1 (n=3)
0	0	0	0	1	7	14	pph-4.1;atl-1/nT1 (n=3)
0	0	0	0	1	8	NA	pph-4.1;atl-1/nT1 (n=3)
0	0	0	0	2	8	NA	pph-4.1;atl-1/nT1 (n=3)
0	0	0	0	2	8	NA	pph-4.1;atl-1/nT1 (n=3)
0	0	0	0	2	9	NA	pph-4.1;atl-1/nT1 (n=3)
0	0	0	0	2	9	NA	pph-4.1;atl-1/nT1 (n=3)
0	0	0	0	3	10	NA	pph-4.1;atl-1/nT1 (n=3)
0	0	0	0	3	10	NA	pph-4.1;atl-1/nT1 (n=3)
0	0	0	0	3	12	NA	pph-4.1;atl-1/nT1 (n=3)
0	0	0	0	3	13	NA	pph-4.1;atl-1/nT1 (n=3)
0	0	0	0	3	15	NA	pph-4.1;atl-1/nT1 (n=3)
0	0	0	1	3	15	NA	pph-4.1;atl-1/nT1 (n=3)
0	0	0	1	3	17	NA	pph-4.1;atl-1/nT1 (n=3)
0	0	0	1	4	18	NA	pph-4.1;atl-1/nT1 (n=3)
0	0	0	1	4	NA	NA	pph-4.1;atl-1/nT1 (n=3)
0	0	0	1	5	NA	NA	pph-4.1;atl-1/nT1 (n=3)
0	0	0	1	5	NA	NA	pph-4.1;atl-1/nT1 (n=3)
0	0	0	1	6	NA	NA	pph-4.1;atl-1/nT1 (n=3)
0	0	0	1	7	NA	NA	pph-4.1;atl-1/nT1 (n=3)
0	0	0	1	10	NA	NA	pph-4.1;atl-1/nT1 (n=3)
0	0	0	1	12	NA	NA	pph-4.1;atl-1/nT1 (n=3)
0	0	0	1	13	NA	NA	pph-4.1;atl-1/nT1 (n=3)
0	0	0	2	NA	NA	NA	pph-4.1;atl-1/nT1 (n=3)
0	0	0	2	NA	NA	NA	pph-4.1;atl-1/nT1 (n=3)
0	0	0	2	NA	NA	NA	pph-4.1;atl-1/nT1 (n=3)
0	0	0	2	NA	NA	NA	pph-4.1;atl-1/nT1 (n=3)
0	0	0	2	NA	NA	NA	pph-4.1;atl-1/nT1 (n=3)
0	0	0	3	NA	NA	NA	pph-4.1;atl-1/nT1 (n=3)
0	0	0	3	NA	NA	NA	pph-4.1;atl-1/nT1 (n=3)
0	0	0	4	NA	NA	NA	pph-4.1;atl-1/nT1 (n=3)
0	0	1	NA	NA	NA	NA	pph-4.1;atl-1/nT1 (n=3)
0	0	NA	NA	NA	NA	NA	pph-4.1;atl-1/nT1 (n=3)
0	0	NA	NA	NA	NA	NA	pph-4.1;atl-1/nT1 (n=3)
0	0	NA	NA	NA	NA	NA	pph-4.1;atl-1/nT1 (n=3)
0	0	NA	NA	NA	NA	NA	pph-4.1;atl-1/nT1 (n=3)
0	0	NA	NA	NA	NA	NA	pph-4.1;atl-1/nT1 (n=3)
1	0	NA	NA	NA	NA	NA	pph-4.1;atl-1/nT1 (n=3)
1	0	NA	NA	NA	NA	NA	pph-4.1;atl-1/nT1 (n=3)
1	0	NA	NA	NA	NA	NA	pph-4.1;atl-1/nT1 (n=3)
NA	0	NA	NA	NA	NA	NA	pph-4.1;atl-1/nT1 (n=3)
NA	0	NA	NA	NA	NA	NA	pph-4.1;atl-1/nT1 (n=3)
NA	0	NA	NA	NA	NA	NA	pph-4.1;atl-1/nT1 (n=3)
NA	0	NA	NA	NA	NA	NA	pph-4.1;atl-1/nT1 (n=3)
NA	1	NA	NA	NA	NA	NA	pph-4.1;atl-1/nT1 (n=3)
NA	1	NA	NA	NA	NA	NA	pph-4.1;atl-1/nT1 (n=3)
NA	1	NA	NA	NA	NA	NA	pph-4.1;atl-1/nT1 (n=3)
NA	1	NA	NA	NA	NA	NA	pph-4.1;atl-1/nT1 (n=3)
Zone 1	Zone 2	Zone 3	Zone 4	Zone 5	Zone 6	Zone 7	Genotype
0	0	0	0	1	0	0	atl-1/nT1(n=3)
0	0	0	0	3	0	0	atl-1/nT1(n=3)
0	0	0	0	4	0	0	atl-1/nT1(n=3)
0	0	0	0	6	0	0	atl-1/nT1(n=3)
0	0	0	1	6	0	0	atl-1/nT1(n=3)
0	0	0	1	7	1	0	atl-1/nT1(n=3)
0	0	0	1	7	1	0	atl-1/nT1(n=3)
0	0	0	1	7	1	0	atl-1/nT1(n=3)
0	0	0	1	8	1	0	atl-1/nT1(n=3)
0	0	0	1	8	2	0	atl-1/nT1(n=3)
0	0	0	2	8	3	0	atl-1/nT1(n=3)
0	0	0	2	8	3	0	atl-1/nT1(n=3)
0	0	0	2	8	3	1	atl-1/nT1(n=3)
0	0	0	2	8	4	1	atl-1/nT1(n=3)
0	0	0	2	8	4	1	atl-1/nT1(n=3)
0	0	0	2	9	6	1	atl-1/nT1(n=3)
0	0	0	2	9	7	10	atl-1/nT1(n=3)
0	0	0	3	9	7	11	atl-1/nT1(n=3)
0	0	0	3	10	7	NA	atl-1/nT1(n=3)
0	0	0	3	10	10	NA	atl-1/nT1(n=3)
0	0	0	3	10	11	NA	atl-1/nT1(n=3)
0	0	0	3	11	11	NA	atl-1/nT1(n=3)
0	0	0	3	11	12	NA	atl-1/nT1(n=3)
0	0	0	3	11	14	NA	atl-1/nT1(n=3)
0	0	0	3	12	14	NA	atl-1/nT1(n=3)
0	0	0	3	12	17	NA	atl-1/nT1(n=3)
0	0	0	3	13	18	NA	atl-1/nT1(n=3)
NA	0	0	4	13	18	NA	atl-1/nT1(n=3)
NA	0	0	4	14	NA	NA	atl-1/nT1(n=3)
NA	0	0	4	14	NA	NA	atl-1/nT1(n=3)
NA	0	0	4	14	NA	NA	atl-1/nT1(n=3)
NA	0	0	4	14	NA	NA	atl-1/nT1(n=3)
NA	0	0	4	16	NA	NA	atl-1/nT1(n=3)
NA	0	0	4	16	NA	NA	atl-1/nT1(n=3)
NA	0	0	5	19	NA	NA	atl-1/nT1(n=3)
NA	0	0	5	NA	NA	NA	atl-1/nT1(n=3)
NA	0	0	5	NA	NA	NA	atl-1/nT1(n=3)
NA	0	0	5	NA	NA	NA	atl-1/nT1(n=3)
NA	0	0	5	NA	NA	NA	atl-1/nT1(n=3)
NA	0	0	6	NA	NA	NA	atl-1/nT1(n=3)
NA	0	0	6	NA	NA	NA	atl-1/nT1(n=3)
NA	0	1	6	NA	NA	NA	atl-1/nT1(n=3)
NA	0	1	6	NA	NA	NA	atl-1/nT1(n=3)
NA	0	1	7	NA	NA	NA	atl-1/nT1(n=3)
NA	0	1	7	NA	NA	NA	atl-1/nT1(n=3)
NA	1	1	7	NA	NA	NA	atl-1/nT1(n=3)
NA	NA	1	7	NA	NA	NA	atl-1/nT1(n=3)
NA	NA	3	8	NA	NA	NA	atl-1/nT1(n=3)
NA	NA	NA	13	NA	NA	NA	atl-1/nT1(n=3)
0	0	0	6	6	6	0	atl-1/nT1(n=3)
0	0	0	8	7	6	0	atl-1/nT1(n=3)
0	0	0	8	11	7	0	atl-1/nT1(n=3)
0	0	0	9	11	7	0	atl-1/nT1(n=3)
0	0	0	9	11	10	1	atl-1/nT1(n=3)
0	0	0	9	11	10	2	atl-1/nT1(n=3)
0	0	0	10	11	10	5	atl-1/nT1(n=3)
0	0	0	10	11	10	5	atl-1/nT1(n=3)
0	0	1	10	12	11	14	atl-1/nT1(n=3)
0	0	1	11	12	11	22	atl-1/nT1(n=3)
0	0	2	11	12	11	NA	atl-1/nT1(n=3)
0	0	2	11	12	11	NA	atl-1/nT1(n=3)
0	0	2	12	12	13	NA	atl-1/nT1(n=3)
0	0	3	12	12	13	NA	atl-1/nT1(n=3)
0	0	3	12	12	17	NA	atl-1/nT1(n=3)
0	0	3	12	13	18	NA	atl-1/nT1(n=3)
0	0	3	13	13	21	NA	atl-1/nT1(n=3)
0	0	3	13	13	26	NA	atl-1/nT1(n=3)
0	0	3	13	13	NA	NA	atl-1/nT1(n=3)
0	0	4	14	14	NA	NA	atl-1/nT1(n=3)
0	0	4	15	14	NA	NA	atl-1/nT1(n=3)
0	0	4	15	14	NA	NA	atl-1/nT1(n=3)
0	0	4	16	14	NA	NA	atl-1/nT1(n=3)
0	0	4	16	15	NA	NA	atl-1/nT1(n=3)
0	0	5	16	15	NA	NA	atl-1/nT1(n=3)
0	0	5	20	15	NA	NA	atl-1/nT1(n=3)
0	0	6	NA	15	NA	NA	atl-1/nT1(n=3)
0	0	6	NA	16	NA	NA	atl-1/nT1(n=3)
0	0	6	NA	18	NA	NA	atl-1/nT1(n=3)
0	0	8	NA	20	NA	NA	atl-1/nT1(n=3)
0	0	8	NA	20	NA	NA	atl-1/nT1(n=3)
0	0	8	NA	21	NA	NA	atl-1/nT1(n=3)
0	0	8	NA	21	NA	NA	atl-1/nT1(n=3)
NA	0	9	NA	26	NA	NA	atl-1/nT1(n=3)
NA	0	9	NA	NA	NA	NA	atl-1/nT1(n=3)
NA	0	9	NA	NA	NA	NA	atl-1/nT1(n=3)
NA	0	10	NA	NA	NA	NA	atl-1/nT1(n=3)
NA	NA	10	NA	NA	NA	NA	atl-1/nT1(n=3)
NA	NA	10	NA	NA	NA	NA	atl-1/nT1(n=3)
NA	NA	10	NA	NA	NA	NA	atl-1/nT1(n=3)
NA	NA	11	NA	NA	NA	NA	atl-1/nT1(n=3)
NA	NA	12	NA	NA	NA	NA	atl-1/nT1(n=3)
NA	NA	13	NA	NA	NA	NA	atl-1/nT1(n=3)
NA	NA	14	NA	NA	NA	NA	atl-1/nT1(n=3)
0	0	0	4	0	0	0	atl-1/nT1(n=3)
0	0	0	4	2	0	0	atl-1/nT1(n=3)
0	0	0	4	2	0	0	atl-1/nT1(n=3)
0	0	0	5	4	0	0	atl-1/nT1(n=3)
0	0	1	5	4	0	0	atl-1/nT1(n=3)
0	0	1	6	6	0	0	atl-1/nT1(n=3)
0	0	1	6	6	0	0	atl-1/nT1(n=3)
0	0	1	6	8	0	0	atl-1/nT1(n=3)
0	0	1	7	9	0	0	atl-1/nT1(n=3)
0	0	1	8	10	0	0	atl-1/nT1(n=3)
0	0	2	8	10	0	0	atl-1/nT1(n=3)
0	0	2	8	11	0	0	atl-1/nT1(n=3)
0	0	2	8	11	1	NA	atl-1/nT1(n=3)
0	0	2	8	11	1	NA	atl-1/nT1(n=3)
0	0	2	9	12	2	NA	atl-1/nT1(n=3)
0	0	2	9	12	2	NA	atl-1/nT1(n=3)
0	0	3	10	12	2	NA	atl-1/nT1(n=3)
0	0	3	10	13	2	NA	atl-1/nT1(n=3)
0	0	3	10	13	2	NA	atl-1/nT1(n=3)
0	0	3	10	13	2	NA	atl-1/nT1(n=3)
0	0	3	10	13	4	NA	atl-1/nT1(n=3)
0	0	3	10	14	4	NA	atl-1/nT1(n=3)
0	0	4	10	14	5	NA	atl-1/nT1(n=3)
0	0	4	11	15	7	NA	atl-1/nT1(n=3)
0	0	4	11	15	10	NA	atl-1/nT1(n=3)
0	0	4	11	16	11	NA	atl-1/nT1(n=3)
0	0	4	11	16	15	NA	atl-1/nT1(n=3)
0	0	4	12	18	16	NA	atl-1/nT1(n=3)
0	0	5	12	NA	20	NA	atl-1/nT1(n=3)
0	0	5	13	NA	NA	NA	atl-1/nT1(n=3)
0	0	5	13	NA	NA	NA	atl-1/nT1(n=3)
0	0	5	14	NA	NA	NA	atl-1/nT1(n=3)
0	0	5	14	NA	NA	NA	atl-1/nT1(n=3)
0	0	5	15	NA	NA	NA	atl-1/nT1(n=3)
0	0	5	15	NA	NA	NA	atl-1/nT1(n=3)
0	0	5	16	NA	NA	NA	atl-1/nT1(n=3)
0	0	6	17	NA	NA	NA	atl-1/nT1(n=3)
0	0	6	17	NA	NA	NA	atl-1/nT1(n=3)
0	0	6	18	NA	NA	NA	atl-1/nT1(n=3)
0	0	6	20	NA	NA	NA	atl-1/nT1(n=3)
0	0	6	NA	NA	NA	NA	atl-1/nT1(n=3)
1	0	6	NA	NA	NA	NA	atl-1/nT1(n=3)
2	0	6	NA	NA	NA	NA	atl-1/nT1(n=3)
NA	0	6	NA	NA	NA	NA	atl-1/nT1(n=3)
NA	0	7	NA	NA	NA	NA	atl-1/nT1(n=3)
NA	0	8	NA	NA	NA	NA	atl-1/nT1(n=3)
NA	0	8	NA	NA	NA	NA	atl-1/nT1(n=3)
NA	1	8	NA	NA	NA	NA	atl-1/nT1(n=3)
NA	1	8	NA	NA	NA	NA	atl-1/nT1(n=3)
NA	1	8	NA	NA	NA	NA	atl-1/nT1(n=3)
NA	2	10	NA	NA	NA	NA	atl-1/nT1(n=3)
NA	2	11	NA	NA	NA	NA	atl-1/nT1(n=3)
NA	2	12	NA	NA	NA	NA	atl-1/nT1(n=3)
NA	2	NA	NA	NA	NA	NA	atl-1/nT1(n=3)
Zone 1	Zone 2	Zone 3	Zone 4	Zone 5	Zone 6	Zone 7	Genotype
0	0	0	0	0	0	0	control AID (n=3)
0	0	0	0	0	0	0	control AID (n=3)
0	0	0	0	0	0	0	control AID (n=3)
0	0	0	0	0	0	0	control AID (n=3)
0	0	0	0	0	0	0	control AID (n=3)
0	0	0	0	0	0	0	control AID (n=3)
0	0	0	0	0	0	0	control AID (n=3)
0	0	0	1	0	0	NA	control AID (n=3)
0	0	0	1	0	0	NA	control AID (n=3)
0	0	0	1	0	0	NA	control AID (n=3)
0	0	0	1	0	0	NA	control AID (n=3)
0	0	0	1	0	0	NA	control AID (n=3)
0	0	0	1	0	0	NA	control AID (n=3)
0	0	0	1	0	0	NA	control AID (n=3)
0	0	0	1	0	0	NA	control AID (n=3)
0	0	0	1	0	0	NA	control AID (n=3)
0	0	0	2	0	0	NA	control AID (n=3)
0	0	0	2	0	0	NA	control AID (n=3)
0	0	0	2	1	0	NA	control AID (n=3)
0	0	0	2	1	0	NA	control AID (n=3)
0	0	0	2	1	0	NA	control AID (n=3)
0	0	0	2	1	0	NA	control AID (n=3)
0	0	0	2	1	0	NA	control AID (n=3)
0	0	0	2	1	0	NA	control AID (n=3)
1	0	0	2	1	0	NA	control AID (n=3)
1	0	0	3	1	0	NA	control AID (n=3)
1	0	0	3	1	0	NA	control AID (n=3)
1	0	0	3	1	0	NA	control AID (n=3)
1	0	0	3	1	0	NA	control AID (n=3)
1	0	0	3	1	0	NA	control AID (n=3)
1	0	0	3	1	0	NA	control AID (n=3)
1	0	0	3	1	1	NA	control AID (n=3)
1	0	0	3	1	1	NA	control AID (n=3)
1	0	1	3	1	1	NA	control AID (n=3)
2	0	1	3	1	1	NA	control AID (n=3)
2	0	1	3	2	1	NA	control AID (n=3)
3	0	1	3	2	1	NA	control AID (n=3)
NA	0	1	3	2	1	NA	control AID (n=3)
NA	0	1	3	2	1	NA	control AID (n=3)
NA	0	1	3	2	1	NA	control AID (n=3)
NA	0	1	3	2	1	NA	control AID (n=3)
NA	0	1	3	2	1	NA	control AID (n=3)
NA	0	1	3	2	2	NA	control AID (n=3)
NA	0	1	3	2	NA	NA	control AID (n=3)
NA	0	1	3	2	NA	NA	control AID (n=3)
NA	0	1	4	2	NA	NA	control AID (n=3)
NA	0	1	4	3	NA	NA	control AID (n=3)
NA	0	1	4	3	NA	NA	control AID (n=3)
NA	0	1	4	3	NA	NA	control AID (n=3)
NA	0	1	4	3	NA	NA	control AID (n=3)
NA	0	2	4	3	NA	NA	control AID (n=3)
NA	0	2	4	3	NA	NA	control AID (n=3)
NA	0	2	4	3	NA	NA	control AID (n=3)
NA	0	2	4	3	NA	NA	control AID (n=3)
NA	0	2	4	3	NA	NA	control AID (n=3)
NA	0	2	4	3	NA	NA	control AID (n=3)
NA	1	2	4	3	NA	NA	control AID (n=3)
NA	1	2	4	3	NA	NA	control AID (n=3)
NA	1	2	4	3	NA	NA	control AID (n=3)
NA	1	2	4	3	NA	NA	control AID (n=3)
NA	1	3	4	3	NA	NA	control AID (n=3)
NA	1	3	5	3	NA	NA	control AID (n=3)
NA	1	3	5	4	NA	NA	control AID (n=3)
NA	1	3	5	4	NA	NA	control AID (n=3)
NA	1	3	5	4	NA	NA	control AID (n=3)
NA	NA	3	5	4	NA	NA	control AID (n=3)
NA	NA	3	5	4	NA	NA	control AID (n=3)
NA	NA	3	5	5	NA	NA	control AID (n=3)
NA	NA	3	5	5	NA	NA	control AID (n=3)
NA	NA	3	5	5	NA	NA	control AID (n=3)
NA	NA	4	5	6	NA	NA	control AID (n=3)
NA	NA	4	5	NA	NA	NA	control AID (n=3)
NA	NA	4	5	NA	NA	NA	control AID (n=3)
NA	NA	4	6	NA	NA	NA	control AID (n=3)
NA	NA	4	6	NA	NA	NA	control AID (n=3)
NA	NA	4	6	NA	NA	NA	control AID (n=3)
NA	NA	4	6	NA	NA	NA	control AID (n=3)
NA	NA	4	6	NA	NA	NA	control AID (n=3)
NA	NA	4	7	NA	NA	NA	control AID (n=3)
NA	NA	4	7	NA	NA	NA	control AID (n=3)
NA	NA	5	8	NA	NA	NA	control AID (n=3)
NA	NA	5	8	NA	NA	NA	control AID (n=3)
NA	NA	NA	8	NA	NA	NA	control AID (n=3)
NA	NA	NA	9	NA	NA	NA	control AID (n=3)
NA	NA	NA	9	NA	NA	NA	control AID (n=3)
NA	NA	NA	10	NA	NA	NA	control AID (n=3)
NA	NA	NA	10	NA	NA	NA	control AID (n=3)
0	0	0	0	0	0	0	control AID (n=3)
0	0	0	0	0	0	0	control AID (n=3)
0	0	0	0	0	0	0	control AID (n=3)
0	0	0	1	0	0	0	control AID (n=3)
0	0	0	1	0	0	0	control AID (n=3)
0	0	0	1	0	0	0	control AID (n=3)
0	0	0	2	0	0	0	control AID (n=3)
0	0	0	2	0	0	0	control AID (n=3)
0	0	0	2	0	0	1	control AID (n=3)
0	0	0	2	0	0	1	control AID (n=3)
0	0	0	2	0	0	1	control AID (n=3)
0	0	0	3	0	0	NA	control AID (n=3)
0	0	0	3	0	0	NA	control AID (n=3)
0	0	0	3	0	0	NA	control AID (n=3)
0	0	0	3	0	0	NA	control AID (n=3)
0	0	0	3	0	0	NA	control AID (n=3)
0	0	1	3	0	0	NA	control AID (n=3)
0	0	1	3	0	0	NA	control AID (n=3)
0	0	1	3	0	1	NA	control AID (n=3)
0	0	1	3	0	1	NA	control AID (n=3)
0	0	1	3	0	1	NA	control AID (n=3)
0	0	1	3	0	1	NA	control AID (n=3)
0	0	1	3	0	1	NA	control AID (n=3)
0	0	1	3	0	1	NA	control AID (n=3)
0	0	1	3	0	1	NA	control AID (n=3)
0	0	1	3	1	1	NA	control AID (n=3)
0	0	1	3	1	1	NA	control AID (n=3)
0	0	1	4	1	1	NA	control AID (n=3)
0	0	1	4	1	1	NA	control AID (n=3)
0	0	1	4	1	1	NA	control AID (n=3)
0	0	1	4	1	1	NA	control AID (n=3)
0	0	1	4	1	1	NA	control AID (n=3)
0	0	2	4	1	1	NA	control AID (n=3)
0	0	2	4	1	1	NA	control AID (n=3)
0	0	2	4	1	1	NA	control AID (n=3)
0	0	2	4	1	1	NA	control AID (n=3)
0	0	2	4	1	2	NA	control AID (n=3)
0	0	2	4	1	2	NA	control AID (n=3)
0	0	2	4	1	3	NA	control AID (n=3)
0	0	2	4	1	4	NA	control AID (n=3)
0	0	2	5	1	NA	NA	control AID (n=3)
0	0	2	5	1	NA	NA	control AID (n=3)
0	0	2	5	1	NA	NA	control AID (n=3)
0	0	2	5	2	NA	NA	control AID (n=3)
0	0	3	5	2	NA	NA	control AID (n=3)
0	0	3	5	2	NA	NA	control AID (n=3)
0	0	3	5	2	NA	NA	control AID (n=3)
0	0	3	5	2	NA	NA	control AID (n=3)
0	0	3	5	2	NA	NA	control AID (n=3)
0	0	3	5	2	NA	NA	control AID (n=3)
0	0	4	6	2	NA	NA	control AID (n=3)
0	0	4	6	2	NA	NA	control AID (n=3)
0	0	4	6	3	NA	NA	control AID (n=3)
1	0	4	6	3	NA	NA	control AID (n=3)
1	1	4	6	3	NA	NA	control AID (n=3)
1	1	4	6	3	NA	NA	control AID (n=3)
1	1	5	6	3	NA	NA	control AID (n=3)
NA	1	5	6	4	NA	NA	control AID (n=3)
NA	1	5	7	4	NA	NA	control AID (n=3)
NA	1	5	7	5	NA	NA	control AID (n=3)
NA	NA	5	7	7	NA	NA	control AID (n=3)
NA	NA	5	7	8	NA	NA	control AID (n=3)
NA	NA	5	7	8	NA	NA	control AID (n=3)
NA	NA	5	8	9	NA	NA	control AID (n=3)
NA	NA	7	8	NA	NA	NA	control AID (n=3)
NA	NA	7	9	NA	NA	NA	control AID (n=3)
NA	NA	7	9	NA	NA	NA	control AID (n=3)
NA	NA	7	9	NA	NA	NA	control AID (n=3)
NA	NA	NA	9	NA	NA	NA	control AID (n=3)
0	0	0	0	0	0	0	control AID (n=3)
0	0	0	0	0	0	0	control AID (n=3)
0	0	0	0	0	0	0	control AID (n=3)
0	0	0	0	0	0	0	control AID (n=3)
0	0	0	0	0	0	0	control AID (n=3)
0	0	0	1	0	0	0	control AID (n=3)
0	0	0	1	0	0	0	control AID (n=3)
0	0	0	1	0	0	0	control AID (n=3)
0	0	0	1	0	0	0	control AID (n=3)
0	0	0	1	0	0	0	control AID (n=3)
0	0	0	1	0	0	NA	control AID (n=3)
0	0	0	1	0	0	NA	control AID (n=3)
0	0	0	1	0	0	NA	control AID (n=3)
0	0	0	1	0	0	NA	control AID (n=3)
0	0	0	1	0	0	NA	control AID (n=3)
0	0	0	1	0	0	NA	control AID (n=3)
0	0	0	2	0	0	NA	control AID (n=3)
0	0	0	2	0	0	NA	control AID (n=3)
0	0	0	2	0	0	NA	control AID (n=3)
0	0	0	2	0	0	NA	control AID (n=3)
0	0	0	2	0	0	NA	control AID (n=3)
0	0	0	2	0	1	NA	control AID (n=3)
0	0	1	2	0	1	NA	control AID (n=3)
0	0	1	2	0	1	NA	control AID (n=3)
0	0	1	2	0	1	NA	control AID (n=3)
0	0	1	2	0	1	NA	control AID (n=3)
0	0	1	2	0	NA	NA	control AID (n=3)
0	0	1	2	0	NA	NA	control AID (n=3)
0	0	1	2	1	NA	NA	control AID (n=3)
0	0	1	2	1	NA	NA	control AID (n=3)
0	0	1	2	1	NA	NA	control AID (n=3)
0	0	1	2	1	NA	NA	control AID (n=3)
0	0	1	3	1	NA	NA	control AID (n=3)
0	0	1	3	1	NA	NA	control AID (n=3)
0	0	1	3	1	NA	NA	control AID (n=3)
0	0	1	3	1	NA	NA	control AID (n=3)
0	0	1	3	1	NA	NA	control AID (n=3)
0	0	1	3	1	NA	NA	control AID (n=3)
0	0	1	3	1	NA	NA	control AID (n=3)
0	0	1	3	1	NA	NA	control AID (n=3)
0	0	2	3	1	NA	NA	control AID (n=3)
1	0	2	3	1	NA	NA	control AID (n=3)
1	0	2	4	1	NA	NA	control AID (n=3)
1	0	2	4	1	NA	NA	control AID (n=3)
1	0	2	4	1	NA	NA	control AID (n=3)
1	0	2	4	1	NA	NA	control AID (n=3)
1	0	2	4	2	NA	NA	control AID (n=3)
1	0	2	4	2	NA	NA	control AID (n=3)
1	0	2	4	2	NA	NA	control AID (n=3)
NA	0	2	4	2	NA	NA	control AID (n=3)
NA	0	2	4	3	NA	NA	control AID (n=3)
NA	0	2	4	3	NA	NA	control AID (n=3)
NA	0	2	4	3	NA	NA	control AID (n=3)
NA	0	2	4	3	NA	NA	control AID (n=3)
NA	0	2	5	4	NA	NA	control AID (n=3)
NA	0	2	5	4	NA	NA	control AID (n=3)
NA	0	2	5	5	NA	NA	control AID (n=3)
NA	0	3	5	NA	NA	NA	control AID (n=3)
NA	0	3	5	NA	NA	NA	control AID (n=3)
NA	1	3	6	NA	NA	NA	control AID (n=3)
NA	1	3	7	NA	NA	NA	control AID (n=3)
NA	1	3	7	NA	NA	NA	control AID (n=3)
NA	1	3	8	NA	NA	NA	control AID (n=3)
NA	NA	3	9	NA	NA	NA	control AID (n=3)
NA	NA	3	9	NA	NA	NA	control AID (n=3)
NA	NA	3	9	NA	NA	NA	control AID (n=3)
NA	NA	4	12	NA	NA	NA	control AID (n=3)
NA	NA	4	NA	NA	NA	NA	control AID (n=3)
NA	NA	4	NA	NA	NA	NA	control AID (n=3)
NA	NA	4	NA	NA	NA	NA	control AID (n=3)
NA	NA	4	NA	NA	NA	NA	control AID (n=3)
NA	NA	4	NA	NA	NA	NA	control AID (n=3)
NA	NA	4	NA	NA	NA	NA	control AID (n=3)
NA	NA	5	NA	NA	NA	NA	control AID (n=3)
NA	NA	5	NA	NA	NA	NA	control AID (n=3)
NA	NA	5	NA	NA	NA	NA	control AID (n=3)
NA	NA	5	NA	NA	NA	NA	control AID (n=3)
NA	NA	5	NA	NA	NA	NA	control AID (n=3)
NA	NA	5	NA	NA	NA	NA	control AID (n=3)
NA	NA	5	NA	NA	NA	NA	control AID (n=3)
NA	NA	6	NA	NA	NA	NA	control AID (n=3)
NA	NA	7	NA	NA	NA	NA	control AID (n=3)
NA	NA	9	NA	NA	NA	NA	control AID (n=3)
Zone 1	Zone 2	Zone 3	Zone 4	Zone 5	Zone 6	Zone 7	Genotype
0	0	0	1	0	0	0	atl-1 AID (n=3)
0	0	0	2	0	0	0	atl-1 AID (n=3)
0	0	0	2	0	0	0	atl-1 AID (n=3)
0	0	0	2	0	0	0	atl-1 AID (n=3)
0	0	0	3	0	0	0	atl-1 AID (n=3)
0	0	1	3	1	0	0	atl-1 AID (n=3)
0	0	1	4	1	0	0	atl-1 AID (n=3)
0	0	1	4	1	1	0	atl-1 AID (n=3)
0	0	1	4	1	1	0	atl-1 AID (n=3)
0	0	1	5	1	1	0	atl-1 AID (n=3)
0	0	1	5	1	1	NA	atl-1 AID (n=3)
0	0	1	5	1	1	NA	atl-1 AID (n=3)
0	0	1	5	1	1	NA	atl-1 AID (n=3)
0	0	1	5	1	1	NA	atl-1 AID (n=3)
0	0	1	6	1	1	NA	atl-1 AID (n=3)
0	0	1	6	1	1	NA	atl-1 AID (n=3)
0	0	2	6	1	1	NA	atl-1 AID (n=3)
0	0	2	6	1	1	NA	atl-1 AID (n=3)
0	0	2	6	2	1	NA	atl-1 AID (n=3)
0	0	2	6	2	1	NA	atl-1 AID (n=3)
0	0	2	7	2	1	NA	atl-1 AID (n=3)
0	0	2	7	2	1	NA	atl-1 AID (n=3)
0	0	2	7	2	1	NA	atl-1 AID (n=3)
0	0	2	7	2	1	NA	atl-1 AID (n=3)
0	0	3	7	2	2	NA	atl-1 AID (n=3)
1	0	3	7	2	2	NA	atl-1 AID (n=3)
1	0	3	7	2	2	NA	atl-1 AID (n=3)
1	0	3	8	2	2	NA	atl-1 AID (n=3)
1	0	3	8	2	2	NA	atl-1 AID (n=3)
1	0	4	8	2	2	NA	atl-1 AID (n=3)
1	0	4	8	2	3	NA	atl-1 AID (n=3)
1	0	4	8	2	NA	NA	atl-1 AID (n=3)
1	0	4	8	2	NA	NA	atl-1 AID (n=3)
1	0	4	8	3	NA	NA	atl-1 AID (n=3)
1	0	4	8	3	NA	NA	atl-1 AID (n=3)
1	0	4	8	3	NA	NA	atl-1 AID (n=3)
1	0	4	8	3	NA	NA	atl-1 AID (n=3)
1	0	4	8	3	NA	NA	atl-1 AID (n=3)
1	0	4	8	3	NA	NA	atl-1 AID (n=3)
2	1	5	8	4	NA	NA	atl-1 AID (n=3)
2	1	5	9	4	NA	NA	atl-1 AID (n=3)
2	1	5	9	4	NA	NA	atl-1 AID (n=3)
2	1	5	9	4	NA	NA	atl-1 AID (n=3)
2	1	5	9	4	NA	NA	atl-1 AID (n=3)
2	1	5	9	4	NA	NA	atl-1 AID (n=3)
2	1	5	9	4	NA	NA	atl-1 AID (n=3)
3	1	5	9	4	NA	NA	atl-1 AID (n=3)
3	1	5	9	5	NA	NA	atl-1 AID (n=3)
3	1	6	9	5	NA	NA	atl-1 AID (n=3)
3	1	6	9	5	NA	NA	atl-1 AID (n=3)
3	1	6	10	5	NA	NA	atl-1 AID (n=3)
3	1	6	10	5	NA	NA	atl-1 AID (n=3)
3	1	6	10	5	NA	NA	atl-1 AID (n=3)
3	1	7	10	5	NA	NA	atl-1 AID (n=3)
3	1	7	10	5	NA	NA	atl-1 AID (n=3)
3	1	7	10	5	NA	NA	atl-1 AID (n=3)
3	1	7	10	6	NA	NA	atl-1 AID (n=3)
4	1	7	10	6	NA	NA	atl-1 AID (n=3)
4	1	7	10	6	NA	NA	atl-1 AID (n=3)
4	2	8	10	6	NA	NA	atl-1 AID (n=3)
4	2	8	11	7	NA	NA	atl-1 AID (n=3)
5	2	8	11	7	NA	NA	atl-1 AID (n=3)
NA	2	9	11	7	NA	NA	atl-1 AID (n=3)
NA	2	9	11	7	NA	NA	atl-1 AID (n=3)
NA	2	10	11	8	NA	NA	atl-1 AID (n=3)
NA	2	11	12	8	NA	NA	atl-1 AID (n=3)
NA	2	11	12	14	NA	NA	atl-1 AID (n=3)
NA	2	14	12	16	NA	NA	atl-1 AID (n=3)
NA	2	NA	12	16	NA	NA	atl-1 AID (n=3)
NA	3	NA	12	NA	NA	NA	atl-1 AID (n=3)
NA	3	NA	12	NA	NA	NA	atl-1 AID (n=3)
NA	3	NA	12	NA	NA	NA	atl-1 AID (n=3)
NA	3	NA	12	NA	NA	NA	atl-1 AID (n=3)
NA	3	NA	13	NA	NA	NA	atl-1 AID (n=3)
NA	5	NA	13	NA	NA	NA	atl-1 AID (n=3)
NA	6	NA	13	NA	NA	NA	atl-1 AID (n=3)
NA	NA	NA	13	NA	NA	NA	atl-1 AID (n=3)
NA	NA	NA	13	NA	NA	NA	atl-1 AID (n=3)
NA	NA	NA	14	NA	NA	NA	atl-1 AID (n=3)
NA	NA	NA	14	NA	NA	NA	atl-1 AID (n=3)
NA	NA	NA	15	NA	NA	NA	atl-1 AID (n=3)
NA	NA	NA	15	NA	NA	NA	atl-1 AID (n=3)
NA	NA	NA	16	NA	NA	NA	atl-1 AID (n=3)
NA	NA	NA	17	NA	NA	NA	atl-1 AID (n=3)
NA	NA	NA	19	NA	NA	NA	atl-1 AID (n=3)
0	0	0	2	0	0	0	atl-1 AID (n=3)
0	0	0	3	1	0	0	atl-1 AID (n=3)
0	0	0	3	2	0	0	atl-1 AID (n=3)
0	0	0	3	2	0	0	atl-1 AID (n=3)
0	0	0	3	3	0	0	atl-1 AID (n=3)
0	0	0	3	3	0	0	atl-1 AID (n=3)
0	0	0	4	3	0	0	atl-1 AID (n=3)
0	0	0	4	4	1	0	atl-1 AID (n=3)
0	0	0	4	4	1	0	atl-1 AID (n=3)
0	0	0	4	4	1	0	atl-1 AID (n=3)
0	0	0	4	4	1	0	atl-1 AID (n=3)
0	0	0	4	4	1	0	atl-1 AID (n=3)
0	0	0	4	5	2	2	atl-1 AID (n=3)
0	0	0	5	5	2	NA	atl-1 AID (n=3)
0	0	0	5	5	2	NA	atl-1 AID (n=3)
0	0	0	5	5	2	NA	atl-1 AID (n=3)
0	0	0	5	5	2	NA	atl-1 AID (n=3)
0	0	0	5	5	2	NA	atl-1 AID (n=3)
0	0	0	5	5	2	NA	atl-1 AID (n=3)
0	0	0	5	6	2	NA	atl-1 AID (n=3)
0	0	0	5	6	2	NA	atl-1 AID (n=3)
0	0	0	6	6	2	NA	atl-1 AID (n=3)
0	0	0	6	6	2	NA	atl-1 AID (n=3)
0	0	0	6	6	3	NA	atl-1 AID (n=3)
0	0	0	6	6	3	NA	atl-1 AID (n=3)
0	0	0	6	7	3	NA	atl-1 AID (n=3)
0	0	0	6	7	3	NA	atl-1 AID (n=3)
0	0	1	6	7	3	NA	atl-1 AID (n=3)
0	0	1	6	7	3	NA	atl-1 AID (n=3)
0	0	1	6	7	3	NA	atl-1 AID (n=3)
0	0	1	6	7	3	NA	atl-1 AID (n=3)
0	0	1	7	7	3	NA	atl-1 AID (n=3)
0	0	1	7	7	3	NA	atl-1 AID (n=3)
0	0	1	7	7	3	NA	atl-1 AID (n=3)
0	0	1	7	8	4	NA	atl-1 AID (n=3)
0	0	1	8	8	4	NA	atl-1 AID (n=3)
0	0	1	8	8	4	NA	atl-1 AID (n=3)
0	0	1	8	8	4	NA	atl-1 AID (n=3)
0	0	1	8	9	4	NA	atl-1 AID (n=3)
0	0	1	8	9	5	NA	atl-1 AID (n=3)
0	0	2	8	9	5	NA	atl-1 AID (n=3)
0	0	2	8	9	5	NA	atl-1 AID (n=3)
0	0	2	8	9	5	NA	atl-1 AID (n=3)
0	0	2	8	9	5	NA	atl-1 AID (n=3)
0	0	2	8	9	7	NA	atl-1 AID (n=3)
0	0	2	9	10	7	NA	atl-1 AID (n=3)
0	0	3	9	10	7	NA	atl-1 AID (n=3)
0	0	4	9	10	13	NA	atl-1 AID (n=3)
0	0	4	9	10	NA	NA	atl-1 AID (n=3)
0	0	4	9	10	NA	NA	atl-1 AID (n=3)
0	0	5	9	10	NA	NA	atl-1 AID (n=3)
0	1	5	9	10	NA	NA	atl-1 AID (n=3)
0	1	NA	10	10	NA	NA	atl-1 AID (n=3)
1	1	NA	10	10	NA	NA	atl-1 AID (n=3)
1	1	NA	11	10	NA	NA	atl-1 AID (n=3)
2	1	NA	11	11	NA	NA	atl-1 AID (n=3)
NA	1	NA	11	11	NA	NA	atl-1 AID (n=3)
NA	1	NA	12	11	NA	NA	atl-1 AID (n=3)
NA	1	NA	13	12	NA	NA	atl-1 AID (n=3)
NA	1	NA	13	13	NA	NA	atl-1 AID (n=3)
NA	1	NA	14	13	NA	NA	atl-1 AID (n=3)
NA	1	NA	NA	13	NA	NA	atl-1 AID (n=3)
NA	1	NA	NA	15	NA	NA	atl-1 AID (n=3)
NA	1	NA	NA	15	NA	NA	atl-1 AID (n=3)
NA	2	NA	NA	17	NA	NA	atl-1 AID (n=3)
NA	3	NA	NA	18	NA	NA	atl-1 AID (n=3)
NA	6	NA	NA	19	NA	NA	atl-1 AID (n=3)
0	0	0	1	0	0	0	atl-1 AID (n=3)
0	0	0	1	0	0	0	atl-1 AID (n=3)
0	0	0	2	0	0	0	atl-1 AID (n=3)
0	0	0	2	1	0	0	atl-1 AID (n=3)
0	0	0	2	1	0	0	atl-1 AID (n=3)
0	0	0	2	1	0	0	atl-1 AID (n=3)
0	0	0	2	1	0	0	atl-1 AID (n=3)
0	0	0	2	2	0	0	atl-1 AID (n=3)
0	0	0	2	2	0	0	atl-1 AID (n=3)
0	0	0	2	2	0	0	atl-1 AID (n=3)
0	0	0	3	2	0	0	atl-1 AID (n=3)
0	0	0	3	2	0	0	atl-1 AID (n=3)
0	0	0	3	2	0	0	atl-1 AID (n=3)
0	0	0	3	2	0	1	atl-1 AID (n=3)
0	1	0	3	2	0	NA	atl-1 AID (n=3)
0	1	1	3	2	0	NA	atl-1 AID (n=3)
0	1	1	4	2	0	NA	atl-1 AID (n=3)
0	1	1	4	2	0	NA	atl-1 AID (n=3)
1	1	1	4	2	0	NA	atl-1 AID (n=3)
1	1	1	4	2	0	NA	atl-1 AID (n=3)
1	1	1	4	3	0	NA	atl-1 AID (n=3)
1	1	1	4	3	1	NA	atl-1 AID (n=3)
1	1	1	4	3	1	NA	atl-1 AID (n=3)
1	1	1	4	3	1	NA	atl-1 AID (n=3)
1	1	1	4	3	1	NA	atl-1 AID (n=3)
1	1	1	4	3	1	NA	atl-1 AID (n=3)
1	1	1	4	3	1	NA	atl-1 AID (n=3)
2	1	1	4	3	1	NA	atl-1 AID (n=3)
2	1	1	4	4	1	NA	atl-1 AID (n=3)
2	2	1	4	4	1	NA	atl-1 AID (n=3)
2	2	2	5	4	1	NA	atl-1 AID (n=3)
3	2	2	5	5	1	NA	atl-1 AID (n=3)
3	2	2	5	5	2	NA	atl-1 AID (n=3)
3	2	2	5	5	2	NA	atl-1 AID (n=3)
3	2	2	5	5	2	NA	atl-1 AID (n=3)
4	3	2	5	5	2	NA	atl-1 AID (n=3)
4	3	2	5	5	3	NA	atl-1 AID (n=3)
5	3	2	5	6	4	NA	atl-1 AID (n=3)
5	3	2	5	6	NA	NA	atl-1 AID (n=3)
5	3	2	5	6	NA	NA	atl-1 AID (n=3)
6	3	2	5	6	NA	NA	atl-1 AID (n=3)
6	3	2	5	6	NA	NA	atl-1 AID (n=3)
7	3	2	5	6	NA	NA	atl-1 AID (n=3)
NA	3	2	5	6	NA	NA	atl-1 AID (n=3)
NA	4	2	5	6	NA	NA	atl-1 AID (n=3)
NA	4	3	5	7	NA	NA	atl-1 AID (n=3)
NA	4	3	5	7	NA	NA	atl-1 AID (n=3)
NA	4	3	5	8	NA	NA	atl-1 AID (n=3)
NA	5	3	5	8	NA	NA	atl-1 AID (n=3)
NA	5	3	6	8	NA	NA	atl-1 AID (n=3)
NA	NA	3	6	8	NA	NA	atl-1 AID (n=3)
NA	NA	4	6	9	NA	NA	atl-1 AID (n=3)
NA	NA	4	6	9	NA	NA	atl-1 AID (n=3)
NA	NA	4	6	9	NA	NA	atl-1 AID (n=3)
NA	NA	4	6	9	NA	NA	atl-1 AID (n=3)
NA	NA	4	6	9	NA	NA	atl-1 AID (n=3)
NA	NA	4	6	10	NA	NA	atl-1 AID (n=3)
NA	NA	5	6	10	NA	NA	atl-1 AID (n=3)
NA	NA	5	6	10	NA	NA	atl-1 AID (n=3)
NA	NA	6	6	11	NA	NA	atl-1 AID (n=3)
NA	NA	NA	6	11	NA	NA	atl-1 AID (n=3)
NA	NA	NA	6	11	NA	NA	atl-1 AID (n=3)
NA	NA	NA	6	11	NA	NA	atl-1 AID (n=3)
NA	NA	NA	6	11	NA	NA	atl-1 AID (n=3)
NA	NA	NA	6	12	NA	NA	atl-1 AID (n=3)
NA	NA	NA	6	12	NA	NA	atl-1 AID (n=3)
NA	NA	NA	7	12	NA	NA	atl-1 AID (n=3)
NA	NA	NA	7	14	NA	NA	atl-1 AID (n=3)
NA	NA	NA	7	NA	NA	NA	atl-1 AID (n=3)
NA	NA	NA	7	NA	NA	NA	atl-1 AID (n=3)
NA	NA	NA	8	NA	NA	NA	atl-1 AID (n=3)
NA	NA	NA	8	NA	NA	NA	atl-1 AID (n=3)
NA	NA	NA	8	NA	NA	NA	atl-1 AID (n=3)
NA	NA	NA	8	NA	NA	NA	atl-1 AID (n=3)
NA	NA	NA	8	NA	NA	NA	atl-1 AID (n=3)
NA	NA	NA	8	NA	NA	NA	atl-1 AID (n=3)
NA	NA	NA	8	NA	NA	NA	atl-1 AID (n=3)
NA	NA	NA	8	NA	NA	NA	atl-1 AID (n=3)
NA	NA	NA	8	NA	NA	NA	atl-1 AID (n=3)
NA	NA	NA	9	NA	NA	NA	atl-1 AID (n=3)
NA	NA	NA	9	NA	NA	NA	atl-1 AID (n=3)
NA	NA	NA	9	NA	NA	NA	atl-1 AID (n=3)
NA	NA	NA	9	NA	NA	NA	atl-1 AID (n=3)
NA	NA	NA	9	NA	NA	NA	atl-1 AID (n=3)
NA	NA	NA	9	NA	NA	NA	atl-1 AID (n=3)
NA	NA	NA	10	NA	NA	NA	atl-1 AID (n=3)
NA	NA	NA	10	NA	NA	NA	atl-1 AID (n=3)
NA	NA	NA	10	NA	NA	NA	atl-1 AID (n=3)
NA	NA	NA	11	NA	NA	NA	atl-1 AID (n=3)
NA	NA	NA	11	NA	NA	NA	atl-1 AID (n=3)
NA	NA	NA	12	NA	NA	NA	atl-1 AID (n=3)
NA	NA	NA	12	NA	NA	NA	atl-1 AID (n=3)
NA	NA	NA	12	NA	NA	NA	atl-1 AID (n=3)
NA	NA	NA	13	NA	NA	NA	atl-1 AID (n=3)
NA	NA	NA	13	NA	NA	NA	atl-1 AID (n=3)
