# Supplementary material for: Phosphoregulation of DSB-1 mediates control of meiotic double-strand break activity
Source: eLife journal article supplement (doi:10.7554/elife.77956), 2022-06-27
Supplement: supp [file elife-77956-supp-v1.zip › elife_poa_e77956_Figure_2_source_data_1.xlsx]

## Sheet: Figure 2C
Figure 2C Quantification of RAD-51 foci in each genotype
Zone 1	Zone 2	Zone 3	Zone 4	Zone 5	Zone 6	Zone 7	Gonad#	Genotype
0	0	0	1	0	0	0	1	WT(n=4)
0	0	0	1	0	0	0	1	WT(n=4)
0	0	0	1	0	0	0	1	WT(n=4)
0	0	0	2	0	0	0	1	WT(n=4)
0	0	0	2	0	0	0	1	WT(n=4)
0	0	0	2	1	0	0	1	WT(n=4)
0	0	0	2	1	0	0	1	WT(n=4)
0	0	0	2	1	0	0	1	WT(n=4)
0	0	0	2	1	0	0	1	WT(n=4)
0	0	0	2	1	0	0	1	WT(n=4)
0	0	0	2	1	0	0	1	WT(n=4)
0	0	0	2	1	0	0	1	WT(n=4)
0	0	0	3	2	0	0	1	WT(n=4)
0	0	0	3	2	0	0	1	WT(n=4)
0	0	0	3	2	0	0	1	WT(n=4)
0	0	0	3	2	0	0	1	WT(n=4)
0	0	0	3	2	0	0	1	WT(n=4)
0	0	0	3	2	0	0	1	WT(n=4)
0	0	0	4	2	0	0	1	WT(n=4)
0	0	0	4	2	0	0	1	WT(n=4)
0	0	0	4	2	0	0	1	WT(n=4)
0	0	0	4	2	0	0	1	WT(n=4)
0	0	0	4	2	0	0	1	WT(n=4)
0	0	0	4	3	0	0	1	WT(n=4)
0	0	0	4	3	1	1	1	WT(n=4)
0	0	0	4	3	1	1	1	WT(n=4)
0	0	0	4	3	1	1	1	WT(n=4)
0	0	0	4	3	1	1	1	WT(n=4)
0	0	0	4	3	1	1	1	WT(n=4)
0	0	0	5	3	1	1	1	WT(n=4)
0	0	0	5	3	1	1	1	WT(n=4)
0	0	0	5	3	1	1	1	WT(n=4)
0	0	0	5	3	1	1	1	WT(n=4)
0	0	0	5	3	1	1	1	WT(n=4)
0	0	0	5	3	2	2	1	WT(n=4)
0	0	1	5	3	2	NA	1	WT(n=4)
0	0	1	5	3	2	NA	1	WT(n=4)
0	0	1	5	3	2	NA	1	WT(n=4)
0	0	1	5	3	3	NA	1	WT(n=4)
0	0	1	5	4	3	NA	1	WT(n=4)
0	0	1	6	4	3	NA	1	WT(n=4)
0	0	1	6	4	3	NA	1	WT(n=4)
0	0	1	6	4	4	NA	1	WT(n=4)
1	0	1	6	4	5	NA	1	WT(n=4)
2	0	1	6	4	6	NA	1	WT(n=4)
NA	0	1	6	4	7	NA	1	WT(n=4)
NA	0	1	6	4	NA	NA	1	WT(n=4)
NA	0	1	6	5	NA	NA	1	WT(n=4)
NA	0	1	6	5	NA	NA	1	WT(n=4)
NA	0	1	6	6	NA	NA	1	WT(n=4)
NA	0	1	6	6	NA	NA	1	WT(n=4)
NA	0	1	6	6	NA	NA	1	WT(n=4)
NA	0	2	6	9	NA	NA	1	WT(n=4)
NA	0	2	7	15	NA	NA	1	WT(n=4)
NA	0	2	7	27	NA	NA	1	WT(n=4)
NA	0	2	7	27	NA	NA	1	WT(n=4)
NA	0	4	8	8	NA	NA	1	WT(n=4)
NA	1	4	8	NA	NA	NA	1	WT(n=4)
NA	1	4	8	NA	NA	NA	1	WT(n=4)
NA	1	5	8	NA	NA	NA	1	WT(n=4)
NA	NA	5	9	NA	NA	NA	1	WT(n=4)
NA	NA	5	9	NA	NA	NA	1	WT(n=4)
NA	NA	7	10	NA	NA	NA	1	WT(n=4)
0	0	0	1	0	0	0	2	WT(n=4)
0	0	0	1	0	0	0	2	WT(n=4)
0	0	0	2	1	0	0	2	WT(n=4)
0	0	0	2	1	0	0	2	WT(n=4)
0	0	0	2	1	0	0	2	WT(n=4)
0	0	0	2	1	0	0	2	WT(n=4)
0	0	0	2	1	0	0	2	WT(n=4)
0	0	0	2	1	0	0	2	WT(n=4)
0	0	0	2	1	0	0	2	WT(n=4)
0	0	0	3	1	0	0	2	WT(n=4)
0	0	0	3	1	0	0	2	WT(n=4)
0	0	0	3	2	0	0	2	WT(n=4)
0	0	0	3	2	0	0	2	WT(n=4)
0	0	0	3	2	0	1	2	WT(n=4)
0	0	0	4	2	0	1	2	WT(n=4)
0	0	0	4	2	0	1	2	WT(n=4)
0	0	0	4	2	0	1	2	WT(n=4)
0	0	0	4	2	0	NA	2	WT(n=4)
0	0	0	4	2	0	NA	2	WT(n=4)
0	0	0	4	3	1	NA	2	WT(n=4)
0	0	0	4	3	1	NA	2	WT(n=4)
0	0	0	4	3	1	NA	2	WT(n=4)
0	0	0	4	3	1	NA	2	WT(n=4)
0	0	0	4	3	1	NA	2	WT(n=4)
0	0	0	4	3	1	NA	2	WT(n=4)
0	0	0	4	3	2	NA	2	WT(n=4)
0	0	0	4	3	2	NA	2	WT(n=4)
1	0	1	4	3	3	NA	2	WT(n=4)
1	0	1	4	3	3	NA	2	WT(n=4)
1	0	1	4	4	3	NA	2	WT(n=4)
1	0	1	5	4	3	NA	2	WT(n=4)
2	0	1	5	4	NA	NA	2	WT(n=4)
NA	0	1	5	4	NA	NA	2	WT(n=4)
NA	0	1	6	4	NA	NA	2	WT(n=4)
NA	0	1	6	4	NA	NA	2	WT(n=4)
NA	0	2	6	4	NA	NA	2	WT(n=4)
NA	0	2	6	4	NA	NA	2	WT(n=4)
NA	0	2	6	4	NA	NA	2	WT(n=4)
NA	0	2	7	5	NA	NA	2	WT(n=4)
NA	0	2	7	5	NA	NA	2	WT(n=4)
NA	0	2	7	5	NA	NA	2	WT(n=4)
NA	0	3	7	5	NA	NA	2	WT(n=4)
NA	0	3	7	5	NA	NA	2	WT(n=4)
NA	0	3	7	6	NA	NA	2	WT(n=4)
NA	0	3	7	6	NA	NA	2	WT(n=4)
NA	0	4	8	6	NA	NA	2	WT(n=4)
NA	0	4	8	7	NA	NA	2	WT(n=4)
NA	0	5	8	13	NA	NA	2	WT(n=4)
NA	0	6	8	NA	NA	NA	2	WT(n=4)
NA	0	NA	9	NA	NA	NA	2	WT(n=4)
NA	1	NA	9	NA	NA	NA	2	WT(n=4)
NA	1	NA	10	NA	NA	NA	2	WT(n=4)
NA	2	NA	NA	NA	NA	NA	2	WT(n=4)
0	0	0	0	0	0	0	3	WT(n=4)
0	0	0	0	0	0	0	3	WT(n=4)
0	0	0	1	0	0	0	3	WT(n=4)
0	0	0	1	0	0	0	3	WT(n=4)
0	0	0	2	0	0	0	3	WT(n=4)
0	0	0	2	0	0	0	3	WT(n=4)
0	0	0	2	0	0	0	3	WT(n=4)
0	0	0	3	0	0	0	3	WT(n=4)
0	0	0	3	0	0	0	3	WT(n=4)
0	0	0	3	1	0	0	3	WT(n=4)
0	0	0	3	1	0	0	3	WT(n=4)
0	0	0	3	1	0	0	3	WT(n=4)
0	0	0	3	1	0	0	3	WT(n=4)
0	0	0	3	1	0	0	3	WT(n=4)
0	0	0	3	1	0	0	3	WT(n=4)
0	0	0	3	1	0	0	3	WT(n=4)
0	0	0	3	1	0	0	3	WT(n=4)
0	0	0	4	1	0	0	3	WT(n=4)
0	0	0	4	2	0	0	3	WT(n=4)
0	0	0	4	2	0	0	3	WT(n=4)
0	0	0	4	2	1	0	3	WT(n=4)
0	0	0	4	2	1	0	3	WT(n=4)
0	0	0	4	2	1	0	3	WT(n=4)
0	0	0	4	3	1	0	3	WT(n=4)
0	0	0	4	3	1	1	3	WT(n=4)
0	0	0	4	3	1	1	3	WT(n=4)
0	0	0	4	3	1	NA	3	WT(n=4)
0	0	1	5	3	1	NA	3	WT(n=4)
0	0	1	5	3	2	NA	3	WT(n=4)
0	0	1	5	3	2	NA	3	WT(n=4)
0	0	1	5	3	2	NA	3	WT(n=4)
0	0	1	5	4	3	NA	3	WT(n=4)
0	0	1	5	4	3	NA	3	WT(n=4)
0	0	1	5	4	3	NA	3	WT(n=4)
0	0	1	5	4	NA	NA	3	WT(n=4)
0	0	1	5	4	NA	NA	3	WT(n=4)
0	0	1	6	5	NA	NA	3	WT(n=4)
0	0	2	6	5	NA	NA	3	WT(n=4)
0	0	2	7	6	NA	NA	3	WT(n=4)
0	0	2	7	6	NA	NA	3	WT(n=4)
0	0	2	7	6	NA	NA	3	WT(n=4)
0	0	2	7	7	NA	NA	3	WT(n=4)
0	0	2	7	7	NA	NA	3	WT(n=4)
0	0	3	7	7	NA	NA	3	WT(n=4)
0	0	3	7	8	NA	NA	3	WT(n=4)
0	0	3	7	NA	NA	NA	3	WT(n=4)
0	0	3	7	NA	NA	NA	3	WT(n=4)
0	0	3	7	NA	NA	NA	3	WT(n=4)
0	0	3	8	NA	NA	NA	3	WT(n=4)
0	0	3	8	NA	NA	NA	3	WT(n=4)
1	0	4	8	NA	NA	NA	3	WT(n=4)
NA	0	4	8	NA	NA	NA	3	WT(n=4)
NA	0	4	11	NA	NA	NA	3	WT(n=4)
NA	1	6	NA	NA	NA	NA	3	WT(n=4)
NA	1	6	NA	NA	NA	NA	3	WT(n=4)
NA	NA	6	NA	NA	NA	NA	3	WT(n=4)
NA	NA	6	NA	NA	NA	NA	3	WT(n=4)
0	0	0	0	0	0	0	4	WT(n=4)
0	0	0	0	1	0	0	4	WT(n=4)
0	0	0	0	1	0	0	4	WT(n=4)
0	0	0	1	1	0	0	4	WT(n=4)
0	0	0	1	1	0	0	4	WT(n=4)
0	0	0	1	1	0	0	4	WT(n=4)
0	0	0	2	2	0	0	4	WT(n=4)
0	0	0	2	2	0	0	4	WT(n=4)
0	0	0	2	2	0	0	4	WT(n=4)
0	0	0	2	2	0	0	4	WT(n=4)
0	0	0	2	2	0	0	4	WT(n=4)
0	0	0	2	2	0	0	4	WT(n=4)
0	0	0	3	2	0	0	4	WT(n=4)
0	0	0	3	2	1	0	4	WT(n=4)
0	0	0	3	3	1	0	4	WT(n=4)
0	0	0	3	3	1	0	4	WT(n=4)
0	0	0	3	3	1	0	4	WT(n=4)
0	0	0	4	3	1	0	4	WT(n=4)
0	0	0	4	3	1	0	4	WT(n=4)
0	0	0	4	3	1	1	4	WT(n=4)
0	0	0	4	3	1	1	4	WT(n=4)
0	0	0	4	3	1	1	4	WT(n=4)
0	0	0	4	3	1	2	4	WT(n=4)
0	0	0	4	4	1	2	4	WT(n=4)
0	0	0	4	4	1	2	4	WT(n=4)
0	0	0	4	4	1	2	4	WT(n=4)
0	0	0	4	4	2	2	4	WT(n=4)
0	0	0	4	4	2	NA	4	WT(n=4)
0	0	0	4	4	2	NA	4	WT(n=4)
0	0	0	4	4	2	NA	4	WT(n=4)
0	0	0	5	4	2	NA	4	WT(n=4)
0	0	0	5	4	2	NA	4	WT(n=4)
1	0	0	5	4	2	NA	4	WT(n=4)
1	NA	1	5	4	2	NA	4	WT(n=4)
NA	NA	2	5	4	3	NA	4	WT(n=4)
NA	NA	NA	5	4	3	NA	4	WT(n=4)
NA	NA	NA	5	5	3	NA	4	WT(n=4)
NA	NA	NA	5	5	3	NA	4	WT(n=4)
NA	NA	NA	5	5	3	NA	4	WT(n=4)
NA	NA	NA	5	5	3	NA	4	WT(n=4)
NA	NA	NA	5	5	3	NA	4	WT(n=4)
NA	NA	NA	5	5	3	NA	4	WT(n=4)
NA	NA	NA	5	5	6	NA	4	WT(n=4)
NA	NA	NA	5	5	7	NA	4	WT(n=4)
NA	NA	NA	5	6	NA	NA	4	WT(n=4)
NA	NA	NA	5	6	NA	NA	4	WT(n=4)
NA	NA	NA	5	6	NA	NA	4	WT(n=4)
NA	NA	NA	6	6	NA	NA	4	WT(n=4)
NA	NA	NA	6	6	NA	NA	4	WT(n=4)
NA	NA	NA	6	6	NA	NA	4	WT(n=4)
NA	NA	NA	6	6	NA	NA	4	WT(n=4)
NA	NA	NA	6	6	NA	NA	4	WT(n=4)
NA	NA	NA	6	7	NA	NA	4	WT(n=4)
NA	NA	NA	6	7	NA	NA	4	WT(n=4)
NA	NA	NA	7	7	NA	NA	4	WT(n=4)
NA	NA	NA	7	7	NA	NA	4	WT(n=4)
NA	NA	NA	7	8	NA	NA	4	WT(n=4)
NA	NA	NA	7	8	NA	NA	4	WT(n=4)
NA	NA	NA	8	9	NA	NA	4	WT(n=4)
NA	NA	NA	9	NA	NA	NA	4	WT(n=4)
NA	NA	NA	10	NA	NA	NA	4	WT(n=4)
NA	NA	NA	10	NA	NA	NA	4	WT(n=4)
Zone 1	Zone 2	Zone 3	Zone 4	Zone 5	Zone 6	Zone 7	Gonad#	Genotype
0	0	0	1	0	0	0	1	dsb-1(5A)(n=4)
0	0	0	3	1	0	0	1	dsb-1(5A)(n=4)
0	0	0	4	1	0	0	1	dsb-1(5A)(n=4)
0	0	0	5	1	0	0	1	dsb-1(5A)(n=4)
0	0	0	5	2	0	0	1	dsb-1(5A)(n=4)
0	0	0	5	2	0	0	1	dsb-1(5A)(n=4)
0	0	0	6	3	0	0	1	dsb-1(5A)(n=4)
0	0	0	6	3	0	0	1	dsb-1(5A)(n=4)
0	0	0	6	3	0	0	1	dsb-1(5A)(n=4)
0	0	0	7	4	0	0	1	dsb-1(5A)(n=4)
0	0	0	7	4	0	0	1	dsb-1(5A)(n=4)
0	0	0	7	4	0	0	1	dsb-1(5A)(n=4)
0	0	0	7	4	0	0	1	dsb-1(5A)(n=4)
0	0	0	7	4	0	0	1	dsb-1(5A)(n=4)
0	0	0	8	4	0	0	1	dsb-1(5A)(n=4)
0	0	0	8	4	0	0	1	dsb-1(5A)(n=4)
0	0	1	8	4	0	0	1	dsb-1(5A)(n=4)
0	0	1	8	4	0	0	1	dsb-1(5A)(n=4)
0	0	2	8	4	1	0	1	dsb-1(5A)(n=4)
0	0	2	8	5	1	0	1	dsb-1(5A)(n=4)
0	0	2	9	6	1	1	1	dsb-1(5A)(n=4)
0	0	2	9	6	1	1	1	dsb-1(5A)(n=4)
0	0	3	9	6	1	1	1	dsb-1(5A)(n=4)
0	0	3	9	6	1	1	1	dsb-1(5A)(n=4)
0	0	4	9	6	1	2	1	dsb-1(5A)(n=4)
0	0	4	9	6	1	NA	1	dsb-1(5A)(n=4)
0	0	4	9	7	1	NA	1	dsb-1(5A)(n=4)
0	0	4	9	7	2	NA	1	dsb-1(5A)(n=4)
0	0	4	10	7	2	NA	1	dsb-1(5A)(n=4)
0	0	4	10	7	2	NA	1	dsb-1(5A)(n=4)
0	0	5	10	7	2	NA	1	dsb-1(5A)(n=4)
0	0	5	10	7	3	NA	1	dsb-1(5A)(n=4)
0	0	5	10	8	3	NA	1	dsb-1(5A)(n=4)
0	0	5	11	8	12	NA	1	dsb-1(5A)(n=4)
0	0	6	11	8	NA	NA	1	dsb-1(5A)(n=4)
0	0	6	11	8	NA	NA	1	dsb-1(5A)(n=4)
0	0	6	11	9	NA	NA	1	dsb-1(5A)(n=4)
0	0	6	11	9	NA	NA	1	dsb-1(5A)(n=4)
0	0	7	11	9	NA	NA	1	dsb-1(5A)(n=4)
0	0	8	12	9	NA	NA	1	dsb-1(5A)(n=4)
0	0	10	12	9	NA	NA	1	dsb-1(5A)(n=4)
0	0	12	12	9	NA	NA	1	dsb-1(5A)(n=4)
0	0	16	12	9	NA	NA	1	dsb-1(5A)(n=4)
0	0	NA	12	10	NA	NA	1	dsb-1(5A)(n=4)
0	0	NA	13	10	NA	NA	1	dsb-1(5A)(n=4)
0	0	NA	13	11	NA	NA	1	dsb-1(5A)(n=4)
0	0	NA	13	11	NA	NA	1	dsb-1(5A)(n=4)
0	0	NA	14	11	NA	NA	1	dsb-1(5A)(n=4)
0	0	NA	16	15	NA	NA	1	dsb-1(5A)(n=4)
1	0	NA	20	19	NA	NA	1	dsb-1(5A)(n=4)
2	0	NA	NA	34	NA	NA	1	dsb-1(5A)(n=4)
NA	0	NA	NA	35	NA	NA	1	dsb-1(5A)(n=4)
NA	0	NA	NA	40	NA	NA	1	dsb-1(5A)(n=4)
NA	0	NA	NA	41	NA	NA	1	dsb-1(5A)(n=4)
NA	0	NA	NA	NA	NA	NA	1	dsb-1(5A)(n=4)
NA	0	NA	NA	NA	NA	NA	1	dsb-1(5A)(n=4)
NA	0	NA	NA	NA	NA	NA	1	dsb-1(5A)(n=4)
NA	1	NA	NA	NA	NA	NA	1	dsb-1(5A)(n=4)
0	0	0	4	0	0	0	2	dsb-1(5A)(n=4)
0	0	0	4	1	0	0	2	dsb-1(5A)(n=4)
0	0	0	6	2	0	0	2	dsb-1(5A)(n=4)
0	0	0	6	2	0	0	2	dsb-1(5A)(n=4)
0	0	0	6	3	0	0	2	dsb-1(5A)(n=4)
0	0	0	6	3	0	0	2	dsb-1(5A)(n=4)
0	0	1	7	3	0	0	2	dsb-1(5A)(n=4)
0	0	1	7	4	0	0	2	dsb-1(5A)(n=4)
0	0	1	8	4	1	0	2	dsb-1(5A)(n=4)
0	0	1	8	5	1	0	2	dsb-1(5A)(n=4)
0	0	1	8	5	1	0	2	dsb-1(5A)(n=4)
0	0	1	8	5	1	0	2	dsb-1(5A)(n=4)
0	0	2	8	5	2	0	2	dsb-1(5A)(n=4)
0	0	2	8	5	2	1	2	dsb-1(5A)(n=4)
0	0	2	9	5	3	1	2	dsb-1(5A)(n=4)
0	0	2	9	6	4	1	2	dsb-1(5A)(n=4)
0	0	2	9	6	4	1	2	dsb-1(5A)(n=4)
0	0	2	9	6	4	1	2	dsb-1(5A)(n=4)
0	0	2	9	6	5	NA	2	dsb-1(5A)(n=4)
0	0	3	9	6	6	NA	2	dsb-1(5A)(n=4)
0	0	3	9	7	6	NA	2	dsb-1(5A)(n=4)
0	0	3	9	7	7	NA	2	dsb-1(5A)(n=4)
0	0	3	10	7	8	NA	2	dsb-1(5A)(n=4)
0	0	3	10	7	9	NA	2	dsb-1(5A)(n=4)
0	0	3	10	8	15	NA	2	dsb-1(5A)(n=4)
0	0	4	10	9	NA	NA	2	dsb-1(5A)(n=4)
0	0	4	10	9	NA	NA	2	dsb-1(5A)(n=4)
0	0	4	10	10	NA	NA	2	dsb-1(5A)(n=4)
0	0	4	11	10	NA	NA	2	dsb-1(5A)(n=4)
0	0	4	11	10	NA	NA	2	dsb-1(5A)(n=4)
0	0	4	11	10	NA	NA	2	dsb-1(5A)(n=4)
0	0	4	11	10	NA	NA	2	dsb-1(5A)(n=4)
0	0	4	11	11	NA	NA	2	dsb-1(5A)(n=4)
0	0	5	11	12	NA	NA	2	dsb-1(5A)(n=4)
0	0	5	11	14	NA	NA	2	dsb-1(5A)(n=4)
0	0	5	12	17	NA	NA	2	dsb-1(5A)(n=4)
NA	0	5	12	NA	NA	NA	2	dsb-1(5A)(n=4)
NA	0	6	14	NA	NA	NA	2	dsb-1(5A)(n=4)
NA	0	6	14	NA	NA	NA	2	dsb-1(5A)(n=4)
NA	0	6	15	NA	NA	NA	2	dsb-1(5A)(n=4)
NA	0	6	24	NA	NA	NA	2	dsb-1(5A)(n=4)
NA	1	6	NA	NA	NA	NA	2	dsb-1(5A)(n=4)
NA	NA	6	NA	NA	NA	NA	2	dsb-1(5A)(n=4)
NA	NA	6	NA	NA	NA	NA	2	dsb-1(5A)(n=4)
NA	NA	6	NA	NA	NA	NA	2	dsb-1(5A)(n=4)
NA	NA	7	NA	NA	NA	NA	2	dsb-1(5A)(n=4)
NA	NA	7	NA	NA	NA	NA	2	dsb-1(5A)(n=4)
NA	NA	7	NA	NA	NA	NA	2	dsb-1(5A)(n=4)
NA	NA	7	NA	NA	NA	NA	2	dsb-1(5A)(n=4)
NA	NA	7	NA	NA	NA	NA	2	dsb-1(5A)(n=4)
NA	NA	8	NA	NA	NA	NA	2	dsb-1(5A)(n=4)
NA	NA	8	NA	NA	NA	NA	2	dsb-1(5A)(n=4)
NA	NA	8	NA	NA	NA	NA	2	dsb-1(5A)(n=4)
NA	NA	8	NA	NA	NA	NA	2	dsb-1(5A)(n=4)
NA	NA	10	NA	NA	NA	NA	2	dsb-1(5A)(n=4)
NA	NA	12	NA	NA	NA	NA	2	dsb-1(5A)(n=4)
0	0	1	4	1	0	0	3	dsb-1(5A)(n=4)
0	0	2	4	1	0	0	3	dsb-1(5A)(n=4)
0	0	2	5	1	0	0	3	dsb-1(5A)(n=4)
0	0	3	7	3	0	0	3	dsb-1(5A)(n=4)
0	0	3	7	3	0	0	3	dsb-1(5A)(n=4)
0	0	3	8	3	0	0	3	dsb-1(5A)(n=4)
0	0	3	8	4	0	0	3	dsb-1(5A)(n=4)
0	0	3	8	4	0	0	3	dsb-1(5A)(n=4)
0	0	3	9	5	0	0	3	dsb-1(5A)(n=4)
0	0	4	9	5	0	0	3	dsb-1(5A)(n=4)
0	0	4	9	5	0	0	3	dsb-1(5A)(n=4)
0	0	5	9	5	0	0	3	dsb-1(5A)(n=4)
0	0	5	9	6	0	0	3	dsb-1(5A)(n=4)
0	0	5	10	7	0	1	3	dsb-1(5A)(n=4)
0	0	5	10	7	1	1	3	dsb-1(5A)(n=4)
0	0	6	10	8	1	NA	3	dsb-1(5A)(n=4)
0	0	7	11	8	1	NA	3	dsb-1(5A)(n=4)
0	0	7	11	9	1	NA	3	dsb-1(5A)(n=4)
0	0	7	11	9	1	NA	3	dsb-1(5A)(n=4)
0	0	7	12	9	2	NA	3	dsb-1(5A)(n=4)
0	0	8	12	9	2	NA	3	dsb-1(5A)(n=4)
0	0	8	13	9	2	NA	3	dsb-1(5A)(n=4)
0	0	8	13	9	2	NA	3	dsb-1(5A)(n=4)
0	0	8	13	11	NA	NA	3	dsb-1(5A)(n=4)
0	0	8	14	11	NA	NA	3	dsb-1(5A)(n=4)
0	0	8	14	12	NA	NA	3	dsb-1(5A)(n=4)
0	0	8	16	12	NA	NA	3	dsb-1(5A)(n=4)
0	0	8	16	13	NA	NA	3	dsb-1(5A)(n=4)
0	0	9	17	16	NA	NA	3	dsb-1(5A)(n=4)
0	0	9	26	19	NA	NA	3	dsb-1(5A)(n=4)
0	0	9	34	NA	NA	NA	3	dsb-1(5A)(n=4)
0	0	9	37	NA	NA	NA	3	dsb-1(5A)(n=4)
0	0	9	NA	NA	NA	NA	3	dsb-1(5A)(n=4)
0	0	11	NA	NA	NA	NA	3	dsb-1(5A)(n=4)
0	0	11	NA	NA	NA	NA	3	dsb-1(5A)(n=4)
0	0	11	NA	NA	NA	NA	3	dsb-1(5A)(n=4)
0	0	11	NA	NA	NA	NA	3	dsb-1(5A)(n=4)
0	0	12	NA	NA	NA	NA	3	dsb-1(5A)(n=4)
0	0	12	NA	NA	NA	NA	3	dsb-1(5A)(n=4)
0	0	12	NA	NA	NA	NA	3	dsb-1(5A)(n=4)
0	0	12	NA	NA	NA	NA	3	dsb-1(5A)(n=4)
0	0	12	NA	NA	NA	NA	3	dsb-1(5A)(n=4)
0	1	13	NA	NA	NA	NA	3	dsb-1(5A)(n=4)
1	2	13	NA	NA	NA	NA	3	dsb-1(5A)(n=4)
NA	2	13	NA	NA	NA	NA	3	dsb-1(5A)(n=4)
NA	3	13	NA	NA	NA	NA	3	dsb-1(5A)(n=4)
NA	6	13	NA	NA	NA	NA	3	dsb-1(5A)(n=4)
NA	NA	16	NA	NA	NA	NA	3	dsb-1(5A)(n=4)
NA	NA	16	NA	NA	NA	NA	3	dsb-1(5A)(n=4)
NA	NA	18	NA	NA	NA	NA	3	dsb-1(5A)(n=4)
NA	NA	20	NA	NA	NA	NA	3	dsb-1(5A)(n=4)
NA	NA	22	NA	NA	NA	NA	3	dsb-1(5A)(n=4)
0	0	0	2	7	0	0	4	dsb-1(5A)(n=4)
0	0	0	3	7	0	0	4	dsb-1(5A)(n=4)
0	0	0	4	9	1	0	4	dsb-1(5A)(n=4)
0	0	0	4	9	1	0	4	dsb-1(5A)(n=4)
0	0	0	5	9	1	0	4	dsb-1(5A)(n=4)
0	0	0	6	10	1	0	4	dsb-1(5A)(n=4)
0	0	0	6	10	2	0	4	dsb-1(5A)(n=4)
0	0	0	6	10	2	0	4	dsb-1(5A)(n=4)
0	0	0	6	11	2	0	4	dsb-1(5A)(n=4)
0	0	0	6	12	3	0	4	dsb-1(5A)(n=4)
0	0	1	7	12	3	0	4	dsb-1(5A)(n=4)
0	0	1	7	12	6	0	4	dsb-1(5A)(n=4)
0	0	1	7	14	6	0	4	dsb-1(5A)(n=4)
0	0	1	7	14	7	0	4	dsb-1(5A)(n=4)
0	0	1	7	16	8	0	4	dsb-1(5A)(n=4)
0	0	1	7	16	9	0	4	dsb-1(5A)(n=4)
0	0	1	7	16	9	0	4	dsb-1(5A)(n=4)
0	0	1	8	17	9	0	4	dsb-1(5A)(n=4)
0	0	1	8	19	9	0	4	dsb-1(5A)(n=4)
0	0	1	8	21	9	0	4	dsb-1(5A)(n=4)
0	0	1	8	22	10	0	4	dsb-1(5A)(n=4)
0	0	1	8	25	11	0	4	dsb-1(5A)(n=4)
0	0	1	9	25	11	0	4	dsb-1(5A)(n=4)
0	0	1	9	NA	11	0	4	dsb-1(5A)(n=4)
0	0	1	9	NA	12	0	4	dsb-1(5A)(n=4)
0	0	2	9	NA	14	1	4	dsb-1(5A)(n=4)
0	0	2	10	NA	15	1	4	dsb-1(5A)(n=4)
0	0	2	10	NA	15	1	4	dsb-1(5A)(n=4)
0	0	2	10	NA	17	1	4	dsb-1(5A)(n=4)
0	0	2	10	NA	18	1	4	dsb-1(5A)(n=4)
0	0	2	10	NA	18	1	4	dsb-1(5A)(n=4)
0	0	2	11	NA	19	1	4	dsb-1(5A)(n=4)
0	0	3	11	NA	20	NA	4	dsb-1(5A)(n=4)
0	0	3	11	NA	24	NA	4	dsb-1(5A)(n=4)
0	0	3	12	NA	NA	NA	4	dsb-1(5A)(n=4)
0	0	3	12	NA	NA	NA	4	dsb-1(5A)(n=4)
0	0	3	12	NA	NA	NA	4	dsb-1(5A)(n=4)
0	0	4	13	NA	NA	NA	4	dsb-1(5A)(n=4)
0	0	4	13	NA	NA	NA	4	dsb-1(5A)(n=4)
0	0	5	17	NA	NA	NA	4	dsb-1(5A)(n=4)
0	0	5	NA	NA	NA	NA	4	dsb-1(5A)(n=4)
1	0	5	NA	NA	NA	NA	4	dsb-1(5A)(n=4)
1	0	5	NA	NA	NA	NA	4	dsb-1(5A)(n=4)
2	0	5	NA	NA	NA	NA	4	dsb-1(5A)(n=4)
NA	0	6	NA	NA	NA	NA	4	dsb-1(5A)(n=4)
NA	0	8	NA	NA	NA	NA	4	dsb-1(5A)(n=4)
NA	0	NA	NA	NA	NA	NA	4	dsb-1(5A)(n=4)
NA	0	NA	NA	NA	NA	NA	4	dsb-1(5A)(n=4)
NA	0	NA	NA	NA	NA	NA	4	dsb-1(5A)(n=4)
NA	0	NA	NA	NA	NA	NA	4	dsb-1(5A)(n=4)
NA	0	NA	NA	NA	NA	NA	4	dsb-1(5A)(n=4)
NA	0	NA	NA	NA	NA	NA	4	dsb-1(5A)(n=4)
NA	0	NA	NA	NA	NA	NA	4	dsb-1(5A)(n=4)
NA	0	NA	NA	NA	NA	NA	4	dsb-1(5A)(n=4)
NA	0	NA	NA	NA	NA	NA	4	dsb-1(5A)(n=4)
NA	0	NA	NA	NA	NA	NA	4	dsb-1(5A)(n=4)
NA	0	NA	NA	NA	NA	NA	4	dsb-1(5A)(n=4)
NA	0	NA	NA	NA	NA	NA	4	dsb-1(5A)(n=4)
NA	0	NA	NA	NA	NA	NA	4	dsb-1(5A)(n=4)
NA	0	NA	NA	NA	NA	NA	4	dsb-1(5A)(n=4)
NA	0	NA	NA	NA	NA	NA	4	dsb-1(5A)(n=4)
NA	0	NA	NA	NA	NA	NA	4	dsb-1(5A)(n=4)
NA	0	NA	NA	NA	NA	NA	4	dsb-1(5A)(n=4)
NA	0	NA	NA	NA	NA	NA	4	dsb-1(5A)(n=4)
NA	0	NA	NA	NA	NA	NA	4	dsb-1(5A)(n=4)
NA	0	NA	NA	NA	NA	NA	4	dsb-1(5A)(n=4)
NA	0	NA	NA	NA	NA	NA	4	dsb-1(5A)(n=4)
NA	0	NA	NA	NA	NA	NA	4	dsb-1(5A)(n=4)
NA	0	NA	NA	NA	NA	NA	4	dsb-1(5A)(n=4)
NA	1	NA	NA	NA	NA	NA	4	dsb-1(5A)(n=4)
NA	1	NA	NA	NA	NA	NA	4	dsb-1(5A)(n=4)
NA	1	NA	NA	NA	NA	NA	4	dsb-1(5A)(n=4)
NA	1	NA	NA	NA	NA	NA	4	dsb-1(5A)(n=4)
Zone 1	Zone 2	Zone 3	Zone 4	Zone 5	Zone 6	Zone 7	Gonad#	Genotype
0	0	0	0	0	0	0	1	pph-4.1(n=4)
0	0	0	0	0	0	0	1	pph-4.1(n=4)
0	0	0	0	0	0	0	1	pph-4.1(n=4)
0	0	0	0	0	0	0	1	pph-4.1(n=4)
0	0	0	0	0	0	0	1	pph-4.1(n=4)
0	0	0	0	0	0	0	1	pph-4.1(n=4)
0	0	0	0	0	0	0	1	pph-4.1(n=4)
0	0	0	0	0	0	1	1	pph-4.1(n=4)
0	0	0	0	0	0	1	1	pph-4.1(n=4)
0	0	0	0	0	0	1	1	pph-4.1(n=4)
0	0	0	0	0	0	1	1	pph-4.1(n=4)
0	0	0	0	0	0	2	1	pph-4.1(n=4)
0	0	0	0	0	0	2	1	pph-4.1(n=4)
0	0	0	0	0	0	2	1	pph-4.1(n=4)
0	0	0	0	0	0	NA	1	pph-4.1(n=4)
0	0	0	0	0	0	NA	1	pph-4.1(n=4)
0	0	0	0	0	0	NA	1	pph-4.1(n=4)
0	0	0	0	0	0	NA	1	pph-4.1(n=4)
0	0	0	0	0	0	NA	1	pph-4.1(n=4)
0	0	0	0	0	0	NA	1	pph-4.1(n=4)
0	0	0	0	0	0	NA	1	pph-4.1(n=4)
0	0	0	0	0	0	NA	1	pph-4.1(n=4)
0	0	0	0	0	0	NA	1	pph-4.1(n=4)
0	0	0	0	0	0	NA	1	pph-4.1(n=4)
0	0	0	0	0	0	NA	1	pph-4.1(n=4)
0	0	0	0	0	0	NA	1	pph-4.1(n=4)
0	0	0	0	0	0	NA	1	pph-4.1(n=4)
0	0	0	0	0	0	NA	1	pph-4.1(n=4)
0	0	0	0	0	0	NA	1	pph-4.1(n=4)
1	0	0	0	0	0	NA	1	pph-4.1(n=4)
1	0	0	0	1	0	NA	1	pph-4.1(n=4)
1	0	0	0	1	0	NA	1	pph-4.1(n=4)
1	0	0	0	1	0	NA	1	pph-4.1(n=4)
1	0	0	0	1	0	NA	1	pph-4.1(n=4)
1	0	0	0	2	0	NA	1	pph-4.1(n=4)
NA	0	0	0	2	1	NA	1	pph-4.1(n=4)
NA	0	0	0	2	1	NA	1	pph-4.1(n=4)
NA	0	0	0	2	1	NA	1	pph-4.1(n=4)
NA	0	0	0	2	1	NA	1	pph-4.1(n=4)
NA	0	0	0	2	1	NA	1	pph-4.1(n=4)
NA	0	0	0	2	1	NA	1	pph-4.1(n=4)
NA	0	0	0	2	1	NA	1	pph-4.1(n=4)
NA	0	0	0	3	1	NA	1	pph-4.1(n=4)
NA	0	0	0	4	2	NA	1	pph-4.1(n=4)
NA	0	0	0	4	3	NA	1	pph-4.1(n=4)
NA	0	0	0	4	NA	NA	1	pph-4.1(n=4)
NA	0	0	0	4	NA	NA	1	pph-4.1(n=4)
NA	0	0	0	NA	NA	NA	1	pph-4.1(n=4)
NA	0	0	0	NA	NA	NA	1	pph-4.1(n=4)
NA	0	0	0	NA	NA	NA	1	pph-4.1(n=4)
NA	0	0	0	NA	NA	NA	1	pph-4.1(n=4)
NA	0	0	1	NA	NA	NA	1	pph-4.1(n=4)
NA	0	0	1	NA	NA	NA	1	pph-4.1(n=4)
NA	0	0	NA	NA	NA	NA	1	pph-4.1(n=4)
NA	0	0	NA	NA	NA	NA	1	pph-4.1(n=4)
NA	0	0	NA	NA	NA	NA	1	pph-4.1(n=4)
NA	1	0	NA	NA	NA	NA	1	pph-4.1(n=4)
NA	1	0	NA	NA	NA	NA	1	pph-4.1(n=4)
NA	1	0	NA	NA	NA	NA	1	pph-4.1(n=4)
NA	2	0	NA	NA	NA	NA	1	pph-4.1(n=4)
NA	NA	0	NA	NA	NA	NA	1	pph-4.1(n=4)
NA	NA	0	NA	NA	NA	NA	1	pph-4.1(n=4)
NA	NA	0	NA	NA	NA	NA	1	pph-4.1(n=4)
NA	NA	0	NA	NA	NA	NA	1	pph-4.1(n=4)
NA	NA	0	NA	NA	NA	NA	1	pph-4.1(n=4)
NA	NA	0	NA	NA	NA	NA	1	pph-4.1(n=4)
NA	NA	1	NA	NA	NA	NA	1	pph-4.1(n=4)
0	0	0	0	0	0	0	2	pph-4.1(n=4)
0	0	0	0	0	0	0	2	pph-4.1(n=4)
0	0	0	0	0	0	0	2	pph-4.1(n=4)
0	0	0	0	0	0	0	2	pph-4.1(n=4)
0	0	0	0	0	0	0	2	pph-4.1(n=4)
0	0	0	0	0	0	0	2	pph-4.1(n=4)
0	0	0	0	0	0	0	2	pph-4.1(n=4)
0	0	0	0	0	1	0	2	pph-4.1(n=4)
0	0	0	0	0	1	0	2	pph-4.1(n=4)
0	0	0	0	0	1	0	2	pph-4.1(n=4)
0	0	0	0	0	1	0	2	pph-4.1(n=4)
0	0	0	0	0	1	0	2	pph-4.1(n=4)
0	0	0	0	1	1	0	2	pph-4.1(n=4)
0	0	0	0	1	1	0	2	pph-4.1(n=4)
0	0	0	0	1	1	0	2	pph-4.1(n=4)
0	0	0	0	1	1	0	2	pph-4.1(n=4)
0	0	0	0	1	2	1	2	pph-4.1(n=4)
0	0	0	0	1	2	1	2	pph-4.1(n=4)
0	0	0	0	1	2	1	2	pph-4.1(n=4)
0	0	0	0	1	2	2	2	pph-4.1(n=4)
0	0	0	0	1	2	NA	2	pph-4.1(n=4)
0	0	0	0	1	2	NA	2	pph-4.1(n=4)
0	0	0	0	2	2	NA	2	pph-4.1(n=4)
0	0	0	0	2	3	NA	2	pph-4.1(n=4)
0	0	0	0	2	3	NA	2	pph-4.1(n=4)
0	0	0	0	2	3	NA	2	pph-4.1(n=4)
0	0	0	0	2	3	NA	2	pph-4.1(n=4)
0	0	0	0	2	3	NA	2	pph-4.1(n=4)
0	0	0	0	3	3	NA	2	pph-4.1(n=4)
0	0	0	0	3	4	NA	2	pph-4.1(n=4)
0	0	0	0	4	4	NA	2	pph-4.1(n=4)
0	0	0	0	5	4	NA	2	pph-4.1(n=4)
0	0	0	0	6	NA	NA	2	pph-4.1(n=4)
0	0	0	0	6	NA	NA	2	pph-4.1(n=4)
0	0	0	0	NA	NA	NA	2	pph-4.1(n=4)
0	0	0	0	NA	NA	NA	2	pph-4.1(n=4)
0	0	0	1	NA	NA	NA	2	pph-4.1(n=4)
0	0	0	1	NA	NA	NA	2	pph-4.1(n=4)
0	0	0	1	NA	NA	NA	2	pph-4.1(n=4)
0	0	0	1	NA	NA	NA	2	pph-4.1(n=4)
0	0	0	NA	NA	NA	NA	2	pph-4.1(n=4)
1	0	0	NA	NA	NA	NA	2	pph-4.1(n=4)
1	1	0	NA	NA	NA	NA	2	pph-4.1(n=4)
1	1	0	NA	NA	NA	NA	2	pph-4.1(n=4)
2	1	0	NA	NA	NA	NA	2	pph-4.1(n=4)
NA	NA	0	NA	NA	NA	NA	2	pph-4.1(n=4)
NA	NA	1	NA	NA	NA	NA	2	pph-4.1(n=4)
NA	NA	2	NA	NA	NA	NA	2	pph-4.1(n=4)
0	0	0	0	0	0	0	3	pph-4.1(n=4)
0	0	0	0	0	0	0	3	pph-4.1(n=4)
0	0	0	0	0	0	0	3	pph-4.1(n=4)
0	0	0	0	0	0	0	3	pph-4.1(n=4)
0	0	0	0	0	0	0	3	pph-4.1(n=4)
0	0	0	0	0	0	0	3	pph-4.1(n=4)
0	0	0	0	0	0	0	3	pph-4.1(n=4)
0	0	0	0	0	0	0	3	pph-4.1(n=4)
0	0	0	0	0	0	0	3	pph-4.1(n=4)
0	0	0	0	0	0	0	3	pph-4.1(n=4)
0	0	0	0	0	0	0	3	pph-4.1(n=4)
0	0	0	0	0	0	0	3	pph-4.1(n=4)
0	0	0	0	0	0	0	3	pph-4.1(n=4)
0	0	0	0	0	0	0	3	pph-4.1(n=4)
0	0	0	0	0	0	0	3	pph-4.1(n=4)
0	0	0	0	0	0	1	3	pph-4.1(n=4)
0	0	0	0	0	0	1	3	pph-4.1(n=4)
0	0	0	0	0	1	1	3	pph-4.1(n=4)
0	0	0	0	1	1	1	3	pph-4.1(n=4)
0	0	0	0	1	1	3	3	pph-4.1(n=4)
0	0	0	0	1	1	5	3	pph-4.1(n=4)
0	0	0	0	1	2	NA	3	pph-4.1(n=4)
0	0	0	0	1	3	NA	3	pph-4.1(n=4)
0	0	0	0	1	3	NA	3	pph-4.1(n=4)
0	0	0	0	1	4	NA	3	pph-4.1(n=4)
1	0	0	0	1	4	NA	3	pph-4.1(n=4)
NA	0	0	0	1	4	NA	3	pph-4.1(n=4)
NA	0	0	0	1	5	NA	3	pph-4.1(n=4)
NA	0	0	0	1	5	NA	3	pph-4.1(n=4)
NA	0	0	0	1	5	NA	3	pph-4.1(n=4)
NA	0	0	0	1	5	NA	3	pph-4.1(n=4)
NA	0	0	0	2	6	NA	3	pph-4.1(n=4)
NA	0	0	0	2	6	NA	3	pph-4.1(n=4)
NA	0	0	0	2	7	NA	3	pph-4.1(n=4)
NA	0	0	0	2	8	NA	3	pph-4.1(n=4)
NA	0	0	0	2	8	NA	3	pph-4.1(n=4)
NA	1	0	0	3	9	NA	3	pph-4.1(n=4)
NA	NA	0	0	3	NA	NA	3	pph-4.1(n=4)
NA	NA	0	0	4	NA	NA	3	pph-4.1(n=4)
NA	NA	1	1	6	NA	NA	3	pph-4.1(n=4)
NA	NA	2	1	NA	NA	NA	3	pph-4.1(n=4)
NA	NA	NA	1	NA	NA	NA	3	pph-4.1(n=4)
NA	NA	NA	1	NA	NA	NA	3	pph-4.1(n=4)
NA	NA	NA	1	NA	NA	NA	3	pph-4.1(n=4)
NA	NA	NA	2	NA	NA	NA	3	pph-4.1(n=4)
NA	NA	NA	2	NA	NA	NA	3	pph-4.1(n=4)
0	0	0	0	0	0	0	4	pph-4.1(n=4)
0	0	0	0	0	0	0	4	pph-4.1(n=4)
0	0	0	0	0	0	0	4	pph-4.1(n=4)
0	0	0	0	0	0	0	4	pph-4.1(n=4)
0	0	0	0	0	0	0	4	pph-4.1(n=4)
0	0	0	0	0	0	0	4	pph-4.1(n=4)
0	0	0	0	0	0	0	4	pph-4.1(n=4)
0	0	0	0	0	0	0	4	pph-4.1(n=4)
0	0	0	0	0	0	0	4	pph-4.1(n=4)
0	0	0	0	0	0	0	4	pph-4.1(n=4)
0	0	0	0	0	0	0	4	pph-4.1(n=4)
0	0	0	0	0	0	0	4	pph-4.1(n=4)
0	0	0	0	0	0	0	4	pph-4.1(n=4)
0	0	0	0	0	0	0	4	pph-4.1(n=4)
0	0	0	0	0	0	0	4	pph-4.1(n=4)
0	0	0	0	0	0	0	4	pph-4.1(n=4)
0	0	0	0	0	0	1	4	pph-4.1(n=4)
0	0	0	0	0	0	1	4	pph-4.1(n=4)
0	0	0	0	0	0	1	4	pph-4.1(n=4)
0	0	0	0	0	0	NA	4	pph-4.1(n=4)
0	0	0	0	0	0	NA	4	pph-4.1(n=4)
0	0	0	0	0	0	NA	4	pph-4.1(n=4)
0	0	0	0	0	1	NA	4	pph-4.1(n=4)
0	0	0	0	0	1	NA	4	pph-4.1(n=4)
0	0	0	0	0	1	NA	4	pph-4.1(n=4)
0	0	0	0	0	1	NA	4	pph-4.1(n=4)
0	0	0	0	0	1	NA	4	pph-4.1(n=4)
0	0	0	0	0	1	NA	4	pph-4.1(n=4)
0	0	0	0	0	1	NA	4	pph-4.1(n=4)
0	0	0	0	0	2	NA	4	pph-4.1(n=4)
0	0	0	0	0	2	NA	4	pph-4.1(n=4)
0	0	0	0	0	2	NA	4	pph-4.1(n=4)
0	NA	0	0	0	3	NA	4	pph-4.1(n=4)
0	NA	0	0	0	4	NA	4	pph-4.1(n=4)
0	NA	0	0	0	8	NA	4	pph-4.1(n=4)
0	NA	0	0	1	NA	NA	4	pph-4.1(n=4)
0	NA	0	0	1	NA	NA	4	pph-4.1(n=4)
0	NA	0	0	1	NA	NA	4	pph-4.1(n=4)
1	NA	0	0	1	NA	NA	4	pph-4.1(n=4)
NA	NA	0	0	1	NA	NA	4	pph-4.1(n=4)
NA	NA	0	0	2	NA	NA	4	pph-4.1(n=4)
NA	NA	0	0	2	NA	NA	4	pph-4.1(n=4)
NA	NA	1	0	2	NA	NA	4	pph-4.1(n=4)
NA	NA	1	0	3	NA	NA	4	pph-4.1(n=4)
NA	NA	1	0	3	NA	NA	4	pph-4.1(n=4)
NA	NA	NA	0	4	NA	NA	4	pph-4.1(n=4)
NA	NA	NA	0	NA	NA	NA	4	pph-4.1(n=4)
NA	NA	NA	1	NA	NA	NA	4	pph-4.1(n=4)
NA	NA	NA	1	NA	NA	NA	4	pph-4.1(n=4)
Zone 1	Zone 2	Zone 3	Zone 4	Zone 5	Zone 6	Zone 7	Gonad#	Genotype
0	0	0	0	2	0	0	1	pph-4.1; dsb-1(5A)(n=4)
0	0	0	0	2	0	0	1	pph-4.1; dsb-1(5A)(n=4)
0	0	0	0	2	0	0	1	pph-4.1; dsb-1(5A)(n=4)
0	0	0	0	2	0	0	1	pph-4.1; dsb-1(5A)(n=4)
0	0	0	0	2	0	0	1	pph-4.1; dsb-1(5A)(n=4)
0	0	0	0	3	0	0	1	pph-4.1; dsb-1(5A)(n=4)
0	0	0	0	3	0	0	1	pph-4.1; dsb-1(5A)(n=4)
0	0	0	0	4	0	0	1	pph-4.1; dsb-1(5A)(n=4)
0	0	0	0	4	0	0	1	pph-4.1; dsb-1(5A)(n=4)
0	0	0	0	5	0	0	1	pph-4.1; dsb-1(5A)(n=4)
0	0	0	0	6	0	0	1	pph-4.1; dsb-1(5A)(n=4)
0	0	0	0	6	0	0	1	pph-4.1; dsb-1(5A)(n=4)
0	0	0	0	6	0	0	1	pph-4.1; dsb-1(5A)(n=4)
0	0	0	0	6	0	0	1	pph-4.1; dsb-1(5A)(n=4)
0	0	0	0	7	0	0	1	pph-4.1; dsb-1(5A)(n=4)
0	0	0	0	7	0	0	1	pph-4.1; dsb-1(5A)(n=4)
0	0	2	0	7	0	0	1	pph-4.1; dsb-1(5A)(n=4)
0	0	NA	0	7	0	0	1	pph-4.1; dsb-1(5A)(n=4)
0	0	NA	0	7	0	0	1	pph-4.1; dsb-1(5A)(n=4)
0	0	NA	1	8	1	0	1	pph-4.1; dsb-1(5A)(n=4)
0	0	NA	1	8	1	0	1	pph-4.1; dsb-1(5A)(n=4)
0	0	NA	1	8	1	0	1	pph-4.1; dsb-1(5A)(n=4)
0	0	NA	1	9	1	NA	1	pph-4.1; dsb-1(5A)(n=4)
0	0	NA	1	9	1	NA	1	pph-4.1; dsb-1(5A)(n=4)
0	0	NA	1	9	1	NA	1	pph-4.1; dsb-1(5A)(n=4)
0	0	NA	1	10	1	NA	1	pph-4.1; dsb-1(5A)(n=4)
0	NA	NA	1	10	1	NA	1	pph-4.1; dsb-1(5A)(n=4)
0	NA	NA	1	10	2	NA	1	pph-4.1; dsb-1(5A)(n=4)
0	NA	NA	1	10	2	NA	1	pph-4.1; dsb-1(5A)(n=4)
0	NA	NA	2	10	2	NA	1	pph-4.1; dsb-1(5A)(n=4)
1	NA	NA	2	11	2	NA	1	pph-4.1; dsb-1(5A)(n=4)
NA	NA	NA	2	11	3	NA	1	pph-4.1; dsb-1(5A)(n=4)
NA	NA	NA	3	11	3	NA	1	pph-4.1; dsb-1(5A)(n=4)
NA	NA	NA	3	12	9	NA	1	pph-4.1; dsb-1(5A)(n=4)
NA	NA	NA	3	12	10	NA	1	pph-4.1; dsb-1(5A)(n=4)
NA	NA	NA	3	13	11	NA	1	pph-4.1; dsb-1(5A)(n=4)
NA	NA	NA	3	13	11	NA	1	pph-4.1; dsb-1(5A)(n=4)
NA	NA	NA	3	14	12	NA	1	pph-4.1; dsb-1(5A)(n=4)
NA	NA	NA	3	14	12	NA	1	pph-4.1; dsb-1(5A)(n=4)
NA	NA	NA	3	15	12	NA	1	pph-4.1; dsb-1(5A)(n=4)
NA	NA	NA	4	20	13	NA	1	pph-4.1; dsb-1(5A)(n=4)
NA	NA	NA	5	22	14	NA	1	pph-4.1; dsb-1(5A)(n=4)
NA	NA	NA	6	NA	14	NA	1	pph-4.1; dsb-1(5A)(n=4)
NA	NA	NA	7	NA	14	NA	1	pph-4.1; dsb-1(5A)(n=4)
NA	NA	NA	NA	NA	15	NA	1	pph-4.1; dsb-1(5A)(n=4)
NA	NA	NA	NA	NA	16	NA	1	pph-4.1; dsb-1(5A)(n=4)
NA	NA	NA	NA	NA	17	NA	1	pph-4.1; dsb-1(5A)(n=4)
0	0	0	0	1	0	0	2	pph-4.1; dsb-1(5A)(n=4)
0	0	0	0	2	0	0	2	pph-4.1; dsb-1(5A)(n=4)
0	0	0	0	2	0	0	2	pph-4.1; dsb-1(5A)(n=4)
0	0	0	0	2	0	0	2	pph-4.1; dsb-1(5A)(n=4)
0	0	0	0	3	2	0	2	pph-4.1; dsb-1(5A)(n=4)
0	0	0	0	3	3	0	2	pph-4.1; dsb-1(5A)(n=4)
0	0	0	0	3	5	0	2	pph-4.1; dsb-1(5A)(n=4)
0	0	0	0	3	5	0	2	pph-4.1; dsb-1(5A)(n=4)
0	0	0	0	4	5	0	2	pph-4.1; dsb-1(5A)(n=4)
0	0	0	0	4	6	0	2	pph-4.1; dsb-1(5A)(n=4)
0	0	0	0	4	6	0	2	pph-4.1; dsb-1(5A)(n=4)
0	0	0	0	4	7	0	2	pph-4.1; dsb-1(5A)(n=4)
0	0	0	0	4	7	0	2	pph-4.1; dsb-1(5A)(n=4)
0	0	0	0	5	8	0	2	pph-4.1; dsb-1(5A)(n=4)
0	0	0	0	6	9	NA	2	pph-4.1; dsb-1(5A)(n=4)
0	0	0	0	6	9	NA	2	pph-4.1; dsb-1(5A)(n=4)
0	0	0	1	6	9	NA	2	pph-4.1; dsb-1(5A)(n=4)
0	0	0	1	7	9	NA	2	pph-4.1; dsb-1(5A)(n=4)
0	0	0	1	7	9	NA	2	pph-4.1; dsb-1(5A)(n=4)
0	0	0	1	7	9	NA	2	pph-4.1; dsb-1(5A)(n=4)
0	0	0	1	7	9	NA	2	pph-4.1; dsb-1(5A)(n=4)
0	0	0	1	8	10	NA	2	pph-4.1; dsb-1(5A)(n=4)
0	0	0	2	8	10	NA	2	pph-4.1; dsb-1(5A)(n=4)
0	0	0	2	8	10	NA	2	pph-4.1; dsb-1(5A)(n=4)
0	0	0	2	9	10	NA	2	pph-4.1; dsb-1(5A)(n=4)
0	0	0	2	9	10	NA	2	pph-4.1; dsb-1(5A)(n=4)
0	0	1	2	9	11	NA	2	pph-4.1; dsb-1(5A)(n=4)
0	0	2	2	9	11	NA	2	pph-4.1; dsb-1(5A)(n=4)
0	0	5	2	9	11	NA	2	pph-4.1; dsb-1(5A)(n=4)
0	0	NA	2	10	12	NA	2	pph-4.1; dsb-1(5A)(n=4)
0	0	NA	3	10	12	NA	2	pph-4.1; dsb-1(5A)(n=4)
0	0	NA	3	10	13	NA	2	pph-4.1; dsb-1(5A)(n=4)
0	0	NA	3	10	13	NA	2	pph-4.1; dsb-1(5A)(n=4)
0	0	NA	3	10	13	NA	2	pph-4.1; dsb-1(5A)(n=4)
0	0	NA	3	10	14	NA	2	pph-4.1; dsb-1(5A)(n=4)
0	0	NA	4	10	14	NA	2	pph-4.1; dsb-1(5A)(n=4)
0	0	NA	4	11	NA	NA	2	pph-4.1; dsb-1(5A)(n=4)
0	0	NA	4	11	NA	NA	2	pph-4.1; dsb-1(5A)(n=4)
0	0	NA	4	11	NA	NA	2	pph-4.1; dsb-1(5A)(n=4)
0	0	NA	5	11	NA	NA	2	pph-4.1; dsb-1(5A)(n=4)
0	0	NA	5	12	NA	NA	2	pph-4.1; dsb-1(5A)(n=4)
0	0	NA	5	12	NA	NA	2	pph-4.1; dsb-1(5A)(n=4)
0	0	NA	5	12	NA	NA	2	pph-4.1; dsb-1(5A)(n=4)
0	0	NA	5	13	NA	NA	2	pph-4.1; dsb-1(5A)(n=4)
0	0	NA	5	13	NA	NA	2	pph-4.1; dsb-1(5A)(n=4)
0	0	NA	6	13	NA	NA	2	pph-4.1; dsb-1(5A)(n=4)
0	0	NA	7	13	NA	NA	2	pph-4.1; dsb-1(5A)(n=4)
0	0	NA	8	13	NA	NA	2	pph-4.1; dsb-1(5A)(n=4)
0	0	NA	NA	13	NA	NA	2	pph-4.1; dsb-1(5A)(n=4)
0	0	NA	NA	13	NA	NA	2	pph-4.1; dsb-1(5A)(n=4)
0	0	NA	NA	13	NA	NA	2	pph-4.1; dsb-1(5A)(n=4)
0	NA	NA	NA	14	NA	NA	2	pph-4.1; dsb-1(5A)(n=4)
0	NA	NA	NA	16	NA	NA	2	pph-4.1; dsb-1(5A)(n=4)
0	NA	NA	NA	18	NA	NA	2	pph-4.1; dsb-1(5A)(n=4)
0	NA	NA	NA	NA	NA	NA	2	pph-4.1; dsb-1(5A)(n=4)
0	NA	NA	NA	NA	NA	NA	2	pph-4.1; dsb-1(5A)(n=4)
0	NA	NA	NA	NA	NA	NA	2	pph-4.1; dsb-1(5A)(n=4)
0	NA	NA	NA	NA	NA	NA	2	pph-4.1; dsb-1(5A)(n=4)
0	0	0	0	0	5	0	3	pph-4.1; dsb-1(5A)(n=4)
0	0	0	0	0	5	0	3	pph-4.1; dsb-1(5A)(n=4)
0	0	0	0	0	7	0	3	pph-4.1; dsb-1(5A)(n=4)
0	0	0	0	1	7	0	3	pph-4.1; dsb-1(5A)(n=4)
0	0	0	0	1	9	0	3	pph-4.1; dsb-1(5A)(n=4)
0	0	0	0	1	9	0	3	pph-4.1; dsb-1(5A)(n=4)
0	0	0	0	1	10	0	3	pph-4.1; dsb-1(5A)(n=4)
0	0	0	0	1	10	0	3	pph-4.1; dsb-1(5A)(n=4)
0	0	0	0	2	11	0	3	pph-4.1; dsb-1(5A)(n=4)
0	0	0	0	2	11	0	3	pph-4.1; dsb-1(5A)(n=4)
0	0	0	0	2	11	0	3	pph-4.1; dsb-1(5A)(n=4)
0	0	0	0	2	11	0	3	pph-4.1; dsb-1(5A)(n=4)
0	0	0	0	3	11	0	3	pph-4.1; dsb-1(5A)(n=4)
0	0	0	0	3	11	0	3	pph-4.1; dsb-1(5A)(n=4)
0	0	0	0	4	11	0	3	pph-4.1; dsb-1(5A)(n=4)
0	0	0	0	5	11	1	3	pph-4.1; dsb-1(5A)(n=4)
0	0	0	0	5	12	3	3	pph-4.1; dsb-1(5A)(n=4)
0	0	0	0	5	12	5	3	pph-4.1; dsb-1(5A)(n=4)
0	0	0	0	5	12	7	3	pph-4.1; dsb-1(5A)(n=4)
0	0	0	0	5	12	7	3	pph-4.1; dsb-1(5A)(n=4)
0	0	0	0	6	13	7	3	pph-4.1; dsb-1(5A)(n=4)
0	0	0	0	6	13	7	3	pph-4.1; dsb-1(5A)(n=4)
0	0	0	0	6	13	7	3	pph-4.1; dsb-1(5A)(n=4)
0	0	0	0	6	13	12	3	pph-4.1; dsb-1(5A)(n=4)
0	0	0	0	7	15	14	3	pph-4.1; dsb-1(5A)(n=4)
0	0	0	0	7	15	NA	3	pph-4.1; dsb-1(5A)(n=4)
0	0	0	0	7	17	NA	3	pph-4.1; dsb-1(5A)(n=4)
0	0	0	1	8	17	NA	3	pph-4.1; dsb-1(5A)(n=4)
0	0	0	1	8	18	NA	3	pph-4.1; dsb-1(5A)(n=4)
0	0	0	1	9	18	NA	3	pph-4.1; dsb-1(5A)(n=4)
0	0	0	1	10	19	NA	3	pph-4.1; dsb-1(5A)(n=4)
0	0	0	1	10	20	NA	3	pph-4.1; dsb-1(5A)(n=4)
0	0	0	1	11	NA	NA	3	pph-4.1; dsb-1(5A)(n=4)
0	NA	0	1	11	NA	NA	3	pph-4.1; dsb-1(5A)(n=4)
0	NA	0	1	11	NA	NA	3	pph-4.1; dsb-1(5A)(n=4)
0	NA	0	1	11	NA	NA	3	pph-4.1; dsb-1(5A)(n=4)
0	NA	0	1	12	NA	NA	3	pph-4.1; dsb-1(5A)(n=4)
0	NA	0	1	12	NA	NA	3	pph-4.1; dsb-1(5A)(n=4)
1	NA	0	2	13	NA	NA	3	pph-4.1; dsb-1(5A)(n=4)
1	NA	1	2	14	NA	NA	3	pph-4.1; dsb-1(5A)(n=4)
NA	NA	1	2	15	NA	NA	3	pph-4.1; dsb-1(5A)(n=4)
NA	NA	NA	2	15	NA	NA	3	pph-4.1; dsb-1(5A)(n=4)
NA	NA	NA	2	16	NA	NA	3	pph-4.1; dsb-1(5A)(n=4)
NA	NA	NA	2	17	NA	NA	3	pph-4.1; dsb-1(5A)(n=4)
NA	NA	NA	3	18	NA	NA	3	pph-4.1; dsb-1(5A)(n=4)
NA	NA	NA	3	18	NA	NA	3	pph-4.1; dsb-1(5A)(n=4)
NA	NA	NA	4	18	NA	NA	3	pph-4.1; dsb-1(5A)(n=4)
NA	NA	NA	NA	20	NA	NA	3	pph-4.1; dsb-1(5A)(n=4)
NA	NA	NA	NA	20	NA	NA	3	pph-4.1; dsb-1(5A)(n=4)
NA	NA	NA	NA	20	NA	NA	3	pph-4.1; dsb-1(5A)(n=4)
NA	NA	NA	NA	20	NA	NA	3	pph-4.1; dsb-1(5A)(n=4)
NA	NA	NA	NA	22	NA	NA	3	pph-4.1; dsb-1(5A)(n=4)
NA	NA	NA	NA	22	NA	NA	3	pph-4.1; dsb-1(5A)(n=4)
NA	NA	NA	NA	23	NA	NA	3	pph-4.1; dsb-1(5A)(n=4)
NA	NA	NA	NA	24	NA	NA	3	pph-4.1; dsb-1(5A)(n=4)
NA	NA	NA	NA	24	NA	NA	3	pph-4.1; dsb-1(5A)(n=4)
0	0	0	0	0	0	0	4	pph-4.1; dsb-1(5A)(n=4)
0	0	0	0	0	0	0	4	pph-4.1; dsb-1(5A)(n=4)
0	0	0	0	0	0	0	4	pph-4.1; dsb-1(5A)(n=4)
0	0	0	0	0	0	0	4	pph-4.1; dsb-1(5A)(n=4)
0	0	0	0	0	0	0	4	pph-4.1; dsb-1(5A)(n=4)
0	0	0	0	1	0	0	4	pph-4.1; dsb-1(5A)(n=4)
0	0	0	0	1	0	0	4	pph-4.1; dsb-1(5A)(n=4)
0	0	0	0	1	0	0	4	pph-4.1; dsb-1(5A)(n=4)
0	0	0	0	1	1	0	4	pph-4.1; dsb-1(5A)(n=4)
0	0	0	0	1	1	0	4	pph-4.1; dsb-1(5A)(n=4)
0	0	0	0	1	3	0	4	pph-4.1; dsb-1(5A)(n=4)
0	0	0	0	1	5	0	4	pph-4.1; dsb-1(5A)(n=4)
0	0	0	0	1	7	0	4	pph-4.1; dsb-1(5A)(n=4)
0	0	0	0	2	9	0	4	pph-4.1; dsb-1(5A)(n=4)
0	0	0	0	2	11	2	4	pph-4.1; dsb-1(5A)(n=4)
0	0	0	0	2	12	3	4	pph-4.1; dsb-1(5A)(n=4)
0	0	0	0	2	14	6	4	pph-4.1; dsb-1(5A)(n=4)
0	0	0	0	3	16	9	4	pph-4.1; dsb-1(5A)(n=4)
0	0	0	0	4	17	10	4	pph-4.1; dsb-1(5A)(n=4)
0	0	0	0	4	20	12	4	pph-4.1; dsb-1(5A)(n=4)
0	0	0	0	4	25	12	4	pph-4.1; dsb-1(5A)(n=4)
0	0	0	0	5	29	15	4	pph-4.1; dsb-1(5A)(n=4)
0	0	0	0	6	NA	17	4	pph-4.1; dsb-1(5A)(n=4)
0	0	0	0	8	NA	18	4	pph-4.1; dsb-1(5A)(n=4)
0	0	0	0	8	NA	NA	4	pph-4.1; dsb-1(5A)(n=4)
0	0	0	0	9	NA	NA	4	pph-4.1; dsb-1(5A)(n=4)
0	0	0	1	10	NA	NA	4	pph-4.1; dsb-1(5A)(n=4)
0	0	0	1	11	NA	NA	4	pph-4.1; dsb-1(5A)(n=4)
0	0	0	1	12	NA	NA	4	pph-4.1; dsb-1(5A)(n=4)
0	0	0	1	12	NA	NA	4	pph-4.1; dsb-1(5A)(n=4)
0	0	0	1	15	NA	NA	4	pph-4.1; dsb-1(5A)(n=4)
0	0	0	1	19	NA	NA	4	pph-4.1; dsb-1(5A)(n=4)
0	0	0	1	22	NA	NA	4	pph-4.1; dsb-1(5A)(n=4)
0	0	1	1	NA	NA	NA	4	pph-4.1; dsb-1(5A)(n=4)
0	0	NA	2	NA	NA	NA	4	pph-4.1; dsb-1(5A)(n=4)
0	0	NA	2	NA	NA	NA	4	pph-4.1; dsb-1(5A)(n=4)
0	0	NA	2	NA	NA	NA	4	pph-4.1; dsb-1(5A)(n=4)
0	0	NA	3	NA	NA	NA	4	pph-4.1; dsb-1(5A)(n=4)
0	0	NA	3	NA	NA	NA	4	pph-4.1; dsb-1(5A)(n=4)
0	0	NA	4	NA	NA	NA	4	pph-4.1; dsb-1(5A)(n=4)
0	0	NA	5	NA	NA	NA	4	pph-4.1; dsb-1(5A)(n=4)
0	5	NA	NA	NA	NA	NA	4	pph-4.1; dsb-1(5A)(n=4)
