# Supplementary material for: Phosphoregulation of DSB-1 mediates control of meiotic double-strand break activity
Source: eLife journal article supplement (doi:10.7554/elife.77956), 2022-06-27
Supplement: supp [file elife-77956-supp-v1.zip › elife_poa_e77956_Figure_2_source_data_2.xlsx]

## Sheet: Figure 2D
Figure 2D Brood size, embryonic viability and male percentage of each genotype
Genotype	Total males	Total adult hermaphrodites	Total eggs (brood size)
N2	0	292	294
N2	0	293	298
N2	0	328	330
pph-4.1(tm1598)	1	0	41
pph-4.1(tm1598)	3	4	133
pph-4.1(tm1598)	1	1	132
pph-4.1(tm1598)	2	1	102
pph-4.1(tm1598)	0	2	123
pph-4.1(tm1598)	0	1	69
pph-4.1(tm1598)	1	1	100
pph-4.1(tm1598)	1	1	96
pph-4.1(tm1598)	1	2	147
pph-4.1(tm1598)	0	1	120
pph-4.1(tm1598);dsb-1(5A)	3	22	71
pph-4.1(tm1598);dsb-1(5A)	1	26	120
pph-4.1(tm1598);dsb-1(5A)	2	76	114
pph-4.1(tm1598);dsb-1(5A)	0	27	30
pph-4.1(tm1598);dsb-1(5A)	2	35	108
pph-4.1(tm1598);dsb-1(5A)	2	13	134
pph-4.1(tm1598);dsb-1(5A)	5	36	86
pph-4.1(tm1598);dsb-1(5A)	3	15	64
pph-4.1(tm1598);dsb-1(5A)	7	70	170
pph-4.1(tm1598);dsb-1(5A)	1	25	111
pph-4.1(tm1598);dsb-1(5A)	5	86	159
pph-4.1(tm1598);dsb-1(5A)	3	26	106
