# Supplementary material for: Phosphoregulation of DSB-1 mediates control of meiotic double-strand break activity
Source: eLife journal article supplement (doi:10.7554/elife.77956), 2022-06-27
Supplement: supp [file elife-77956-supp-v1.zip › elife_poa_e77956_Figure_3_source_data_1.xlsx]

## Sheet: Figure 3B
Figure 3B percentage of pairing of each genotype
	nuclei # with paired FISH signal	total nuclei #	Genotype
Zone 1	12	111	WT (n=2)
Zone 2	69	150	WT (n=2)
Zone 3	116	125	WT (n=2)
Zone 4	93	95	WT (n=2)
Zone 5	32	32	WT (n=2)
	nuclei # with paired FISH signal	total nuclei #	Genotype
Zone 1	43	300	pph-4.1 (n=4)
Zone 2	61	283	pph-4.1 (n=4)
Zone 3	47	257	pph-4.1 (n=4)
Zone 4	44	219	pph-4.1 (n=4)
Zone 5	36	124	pph-4.1 (n=4)
	nuclei # with paired FISH signal	total nuclei #	Genotype
Zone 1	47	335	pph-4.1;dsb-1(5A) (n=4)
Zone 2	177	318	pph-4.1;dsb-1(5A) (n=4)
Zone 3	151	266	pph-4.1;dsb-1(5A) (n=4)
Zone 4	144	224	pph-4.1;dsb-1(5A) (n=4)
Zone 5	98	137	pph-4.1;dsb-1(5A) (n=4)
	nuclei # with paired FISH signal	total nuclei #	Genotype
Zone 1	24	181	dsb-1(5A) (n=3)
Zone 2	100	228	dsb-1(5A) (n=3)
Zone 3	191	222	dsb-1(5A) (n=3)
Zone 4	139	143	dsb-1(5A) (n=3)
Zone 5	58	59	dsb-1(5A) (n=3)
