# Supplementary material for: Phosphoregulation of DSB-1 mediates control of meiotic double-strand break activity
Source: eLife journal article supplement (doi:10.7554/elife.77956), 2022-06-27
Supplement: supp [file elife-77956-supp-v1.zip › elife_poa_e77956_Figure_3_source_data_2.xlsx]

## Sheet: Figure 3C
Figure 3C DAPI Body numbers of each genotype
DAPI body #	pph-4.1(n=87)	pph-4.1;dsb-1(5A) (n=130)
5	0	5
6	2	60
7	2	13
8	2	7
9	6	11
10	12	12
11	26	17
12	37	5
