# Supplementary material for: Phosphoregulation of DSB-1 mediates control of meiotic double-strand break activity
Source: eLife journal article supplement (doi:10.7554/elife.77956), 2022-06-27
Supplement: supp [file elife-77956-supp-v1.zip › elife_poa_e77956_Figure_3_source_data_3.xlsx]

## Sheet: Figure 3D
Figure 3D DAPI Body numbers of each genotype
DAPI body #	pph-4.1 control (n=96)	pph-4.1 γ-irradiated (n=92)
5	0	0
6	1	23
7	4	15
8	4	14
9	6	12
10	14	14
11	26	8
12	41	6
