# Supplementary material for: Phosphoregulation of DSB-1 mediates control of meiotic double-strand break activity
Source: eLife journal article supplement (doi:10.7554/elife.77956), 2022-06-27
Supplement: supp [file elife-77956-supp-v1.zip › elife_poa_e77956_Figure_4_source_data_1.xlsx]

## Sheet: Figure 4B
Figure 4B Quantification of RAD-51 foci of each genotype
Zone 1	Zone 2	Zone 3	Zone 4	Zone 5	Zone 6	Zone 7	Gonad#	Genotype
0	0	0	0	0	0	0	1	WT (n=2)
0	0	0	0	0	0	0	1	WT (n=2)
0	0	0	1	0	0	0	1	WT (n=2)
0	0	0	1	0	0	0	1	WT (n=2)
0	0	0	1	0	0	0	1	WT (n=2)
0	0	0	1	0	0	0	1	WT (n=2)
0	0	0	1	0	0	0	1	WT (n=2)
0	0	0	1	0	0	0	1	WT (n=2)
0	0	0	1	0	0	0	1	WT (n=2)
0	0	0	2	0	0	0	1	WT (n=2)
0	0	1	2	0	0	0	1	WT (n=2)
0	0	1	2	0	0	0	1	WT (n=2)
0	0	1	2	0	0	0	1	WT (n=2)
0	0	1	2	0	0	0	1	WT (n=2)
0	0	1	2	0	0	0	1	WT (n=2)
0	0	1	2	0	0	0	1	WT (n=2)
0	0	1	2	0	0	NA	1	WT (n=2)
0	0	1	2	0	0	NA	1	WT (n=2)
0	0	1	2	0	0	NA	1	WT (n=2)
0	0	1	2	0	0	NA	1	WT (n=2)
0	0	2	2	1	0	NA	1	WT (n=2)
0	0	2	3	1	0	NA	1	WT (n=2)
0	0	2	3	1	1	NA	1	WT (n=2)
0	0	2	3	1	1	NA	1	WT (n=2)
0	0	2	3	1	1	NA	1	WT (n=2)
0	0	2	3	1	1	NA	1	WT (n=2)
0	0	2	3	1	2	NA	1	WT (n=2)
0	0	3	3	1	2	NA	1	WT (n=2)
0	0	3	3	1	2	NA	1	WT (n=2)
0	0	3	4	2	NA	NA	1	WT (n=2)
0	0	3	4	2	NA	NA	1	WT (n=2)
0	0	3	4	2	NA	NA	1	WT (n=2)
1	0	4	4	2	NA	NA	1	WT (n=2)
NA	0	4	4	2	NA	NA	1	WT (n=2)
NA	0	4	4	3	NA	NA	1	WT (n=2)
NA	0	4	4	3	NA	NA	1	WT (n=2)
NA	0	4	4	3	NA	NA	1	WT (n=2)
NA	0	4	5	3	NA	NA	1	WT (n=2)
NA	0	4	5	3	NA	NA	1	WT (n=2)
NA	0	4	5	3	NA	NA	1	WT (n=2)
NA	0	5	5	4	NA	NA	1	WT (n=2)
NA	0	5	7	4	NA	NA	1	WT (n=2)
NA	0	5	7	17	NA	NA	1	WT (n=2)
NA	0	5	7	NA	NA	NA	1	WT (n=2)
NA	0	5	8	NA	NA	NA	1	WT (n=2)
NA	0	6	9	NA	NA	NA	1	WT (n=2)
NA	0	6	12	NA	NA	NA	1	WT (n=2)
NA	0	6	NA	NA	NA	NA	1	WT (n=2)
NA	0	6	NA	NA	NA	NA	1	WT (n=2)
NA	0	7	NA	NA	NA	NA	1	WT (n=2)
NA	0	7	NA	NA	NA	NA	1	WT (n=2)
NA	0	7	NA	NA	NA	NA	1	WT (n=2)
NA	0	7	NA	NA	NA	NA	1	WT (n=2)
NA	0	8	NA	NA	NA	NA	1	WT (n=2)
NA	0	8	NA	NA	NA	NA	1	WT (n=2)
NA	0	9	NA	NA	NA	NA	1	WT (n=2)
NA	1	NA	NA	NA	NA	NA	1	WT (n=2)
0	0	0	0	0	0	0	2	WT (n=2)
0	0	0	0	0	0	0	2	WT (n=2)
0	0	0	1	0	0	0	2	WT (n=2)
0	0	0	1	0	0	0	2	WT (n=2)
0	0	0	1	0	0	0	2	WT (n=2)
0	0	0	1	0	0	0	2	WT (n=2)
0	0	0	1	0	0	0	2	WT (n=2)
0	0	0	1	0	0	0	2	WT (n=2)
0	0	0	1	0	0	0	2	WT (n=2)
0	0	0	1	0	0	0	2	WT (n=2)
0	0	0	1	0	0	0	2	WT (n=2)
0	0	0	2	0	0	NA	2	WT (n=2)
0	0	0	2	1	0	NA	2	WT (n=2)
0	0	0	2	1	0	NA	2	WT (n=2)
0	0	0	2	1	0	NA	2	WT (n=2)
0	0	0	2	1	0	NA	2	WT (n=2)
0	0	0	2	1	0	NA	2	WT (n=2)
0	0	0	2	1	0	NA	2	WT (n=2)
0	0	0	2	1	0	NA	2	WT (n=2)
0	0	0	2	1	0	NA	2	WT (n=2)
0	0	0	2	1	0	NA	2	WT (n=2)
0	0	0	2	1	0	NA	2	WT (n=2)
0	0	0	2	1	0	NA	2	WT (n=2)
1	0	0	2	1	1	NA	2	WT (n=2)
NA	0	0	3	1	1	NA	2	WT (n=2)
NA	0	0	3	1	1	NA	2	WT (n=2)
NA	0	0	3	1	1	NA	2	WT (n=2)
NA	0	0	3	1	2	NA	2	WT (n=2)
NA	0	0	3	2	2	NA	2	WT (n=2)
NA	0	0	3	2	2	NA	2	WT (n=2)
NA	0	0	3	2	2	NA	2	WT (n=2)
NA	0	0	3	2	4	NA	2	WT (n=2)
NA	0	0	3	2	6	NA	2	WT (n=2)
NA	0	0	3	2	NA	NA	2	WT (n=2)
NA	0	0	3	2	NA	NA	2	WT (n=2)
NA	0	0	3	2	NA	NA	2	WT (n=2)
NA	0	0	3	2	NA	NA	2	WT (n=2)
NA	0	0	3	2	NA	NA	2	WT (n=2)
NA	0	0	3	2	NA	NA	2	WT (n=2)
NA	0	0	3	2	NA	NA	2	WT (n=2)
NA	0	1	3	2	NA	NA	2	WT (n=2)
NA	1	1	3	2	NA	NA	2	WT (n=2)
NA	NA	1	3	3	NA	NA	2	WT (n=2)
NA	NA	2	3	3	NA	NA	2	WT (n=2)
NA	NA	2	4	3	NA	NA	2	WT (n=2)
NA	NA	2	4	3	NA	NA	2	WT (n=2)
NA	NA	2	4	3	NA	NA	2	WT (n=2)
NA	NA	2	4	3	NA	NA	2	WT (n=2)
NA	NA	2	4	3	NA	NA	2	WT (n=2)
NA	NA	2	4	3	NA	NA	2	WT (n=2)
NA	NA	2	4	3	NA	NA	2	WT (n=2)
NA	NA	2	4	3	NA	NA	2	WT (n=2)
NA	NA	3	4	3	NA	NA	2	WT (n=2)
NA	NA	3	5	3	NA	NA	2	WT (n=2)
NA	NA	4	5	4	NA	NA	2	WT (n=2)
NA	NA	6	5	4	NA	NA	2	WT (n=2)
NA	NA	NA	5	4	NA	NA	2	WT (n=2)
NA	NA	NA	5	4	NA	NA	2	WT (n=2)
NA	NA	NA	5	4	NA	NA	2	WT (n=2)
NA	NA	NA	5	4	NA	NA	2	WT (n=2)
NA	NA	NA	5	4	NA	NA	2	WT (n=2)
NA	NA	NA	6	5	NA	NA	2	WT (n=2)
NA	NA	NA	6	5	NA	NA	2	WT (n=2)
NA	NA	NA	6	5	NA	NA	2	WT (n=2)
NA	NA	NA	6	7	NA	NA	2	WT (n=2)
NA	NA	NA	6	7	NA	NA	2	WT (n=2)
NA	NA	NA	6	NA	NA	NA	2	WT (n=2)
NA	NA	NA	7	NA	NA	NA	2	WT (n=2)
NA	NA	NA	7	NA	NA	NA	2	WT (n=2)
NA	NA	NA	7	NA	NA	NA	2	WT (n=2)
NA	NA	NA	7	NA	NA	NA	2	WT (n=2)
NA	NA	NA	7	NA	NA	NA	2	WT (n=2)
NA	NA	NA	7	NA	NA	NA	2	WT (n=2)
NA	NA	NA	8	NA	NA	NA	2	WT (n=2)
NA	NA	NA	9	NA	NA	NA	2	WT (n=2)
NA	NA	NA	11	NA	NA	NA	2	WT (n=2)
Zone 1	Zone 2	Zone 3	Zone 4	Zone 5	Zone 6	Zone 7	Gonad#	Genotype
0	0	0	1	0	0	0	1	dsb-1(5A) (n=3)
0	0	0	4	0	0	0	1	dsb-1(5A) (n=3)
0	0	0	5	0	0	0	1	dsb-1(5A) (n=3)
0	0	0	5	0	0	0	1	dsb-1(5A) (n=3)
0	0	1	5	1	0	0	1	dsb-1(5A) (n=3)
0	0	1	6	2	0	0	1	dsb-1(5A) (n=3)
0	0	1	6	2	0	0	1	dsb-1(5A) (n=3)
0	0	2	6	3	1	0	1	dsb-1(5A) (n=3)
0	0	2	6	3	1	0	1	dsb-1(5A) (n=3)
0	0	2	6	3	1	0	1	dsb-1(5A) (n=3)
0	0	2	7	3	1	0	1	dsb-1(5A) (n=3)
0	0	2	7	4	1	0	1	dsb-1(5A) (n=3)
0	0	3	7	5	1	0	1	dsb-1(5A) (n=3)
0	0	3	7	5	2	0	1	dsb-1(5A) (n=3)
0	0	3	7	5	2	0	1	dsb-1(5A) (n=3)
0	0	3	8	6	2	NA	1	dsb-1(5A) (n=3)
0	0	3	8	6	2	NA	1	dsb-1(5A) (n=3)
0	0	4	9	6	3	NA	1	dsb-1(5A) (n=3)
0	0	4	9	6	3	NA	1	dsb-1(5A) (n=3)
0	0	4	9	6	3	NA	1	dsb-1(5A) (n=3)
0	0	4	9	6	3	NA	1	dsb-1(5A) (n=3)
0	0	5	9	7	3	NA	1	dsb-1(5A) (n=3)
0	0	5	9	7	4	NA	1	dsb-1(5A) (n=3)
0	0	5	9	7	4	NA	1	dsb-1(5A) (n=3)
0	0	5	10	7	5	NA	1	dsb-1(5A) (n=3)
0	0	5	10	7	7	NA	1	dsb-1(5A) (n=3)
0	0	5	10	8	9	NA	1	dsb-1(5A) (n=3)
0	0	5	10	8	17	NA	1	dsb-1(5A) (n=3)
0	0	5	10	8	NA	NA	1	dsb-1(5A) (n=3)
0	0	6	10	8	NA	NA	1	dsb-1(5A) (n=3)
0	0	6	10	8	NA	NA	1	dsb-1(5A) (n=3)
0	0	6	10	9	NA	NA	1	dsb-1(5A) (n=3)
0	1	6	10	10	NA	NA	1	dsb-1(5A) (n=3)
0	1	7	10	10	NA	NA	1	dsb-1(5A) (n=3)
0	1	7	10	11	NA	NA	1	dsb-1(5A) (n=3)
0	NA	8	11	12	NA	NA	1	dsb-1(5A) (n=3)
0	NA	8	11	12	NA	NA	1	dsb-1(5A) (n=3)
0	NA	8	11	NA	NA	NA	1	dsb-1(5A) (n=3)
0	NA	9	12	NA	NA	NA	1	dsb-1(5A) (n=3)
0	NA	10	12	NA	NA	NA	1	dsb-1(5A) (n=3)
0	NA	11	13	NA	NA	NA	1	dsb-1(5A) (n=3)
0	NA	NA	13	NA	NA	NA	1	dsb-1(5A) (n=3)
0	NA	NA	13	NA	NA	NA	1	dsb-1(5A) (n=3)
0	NA	NA	14	NA	NA	NA	1	dsb-1(5A) (n=3)
0	NA	NA	14	NA	NA	NA	1	dsb-1(5A) (n=3)
1	NA	NA	16	NA	NA	NA	1	dsb-1(5A) (n=3)
0	0	1	0	0	0	0	2	dsb-1(5A) (n=3)
0	0	1	0	0	0	0	2	dsb-1(5A) (n=3)
0	0	2	1	0	0	0	2	dsb-1(5A) (n=3)
0	0	3	2	1	0	0	2	dsb-1(5A) (n=3)
0	0	3	2	1	0	0	2	dsb-1(5A) (n=3)
0	0	3	3	1	0	0	2	dsb-1(5A) (n=3)
0	0	3	4	1	0	0	2	dsb-1(5A) (n=3)
0	0	3	4	1	0	0	2	dsb-1(5A) (n=3)
0	0	3	4	2	0	0	2	dsb-1(5A) (n=3)
0	0	3	4	2	0	0	2	dsb-1(5A) (n=3)
0	0	3	4	2	0	0	2	dsb-1(5A) (n=3)
0	0	4	4	2	0	0	2	dsb-1(5A) (n=3)
0	0	4	4	2	0	0	2	dsb-1(5A) (n=3)
0	0	5	5	2	0	0	2	dsb-1(5A) (n=3)
0	0	5	6	3	0	0	2	dsb-1(5A) (n=3)
0	0	5	7	3	0	0	2	dsb-1(5A) (n=3)
0	0	5	7	3	0	0	2	dsb-1(5A) (n=3)
0	0	5	7	3	0	0	2	dsb-1(5A) (n=3)
0	0	6	7	3	0	0	2	dsb-1(5A) (n=3)
0	0	6	7	3	0	0	2	dsb-1(5A) (n=3)
0	0	6	7	3	1	0	2	dsb-1(5A) (n=3)
0	0	6	8	3	1	0	2	dsb-1(5A) (n=3)
0	0	6	8	3	1	NA	2	dsb-1(5A) (n=3)
0	0	6	8	3	1	NA	2	dsb-1(5A) (n=3)
0	0	6	8	4	2	NA	2	dsb-1(5A) (n=3)
0	0	7	9	4	2	NA	2	dsb-1(5A) (n=3)
0	0	7	10	4	2	NA	2	dsb-1(5A) (n=3)
0	0	8	10	4	2	NA	2	dsb-1(5A) (n=3)
0	0	8	10	4	2	NA	2	dsb-1(5A) (n=3)
0	0	9	10	4	2	NA	2	dsb-1(5A) (n=3)
0	0	9	11	4	2	NA	2	dsb-1(5A) (n=3)
0	0	10	11	4	3	NA	2	dsb-1(5A) (n=3)
0	0	11	11	4	3	NA	2	dsb-1(5A) (n=3)
0	0	NA	12	5	5	NA	2	dsb-1(5A) (n=3)
0	0	NA	NA	5	6	NA	2	dsb-1(5A) (n=3)
0	1	NA	NA	5	7	NA	2	dsb-1(5A) (n=3)
0	1	NA	NA	6	NA	NA	2	dsb-1(5A) (n=3)
0	1	NA	NA	6	NA	NA	2	dsb-1(5A) (n=3)
0	1	NA	NA	7	NA	NA	2	dsb-1(5A) (n=3)
0	1	NA	NA	8	NA	NA	2	dsb-1(5A) (n=3)
0	2	NA	NA	13	NA	NA	2	dsb-1(5A) (n=3)
0	2	NA	NA	17	NA	NA	2	dsb-1(5A) (n=3)
0	3	NA	NA	NA	NA	NA	2	dsb-1(5A) (n=3)
0	NA	NA	NA	NA	NA	NA	2	dsb-1(5A) (n=3)
0	NA	NA	NA	NA	NA	NA	2	dsb-1(5A) (n=3)
0	NA	NA	NA	NA	NA	NA	2	dsb-1(5A) (n=3)
0	NA	NA	NA	NA	NA	NA	2	dsb-1(5A) (n=3)
0	0	0	0	0	0	0	3	dsb-1(5A) (n=3)
0	0	0	0	0	0	0	3	dsb-1(5A) (n=3)
0	0	0	0	0	0	0	3	dsb-1(5A) (n=3)
0	0	0	0	0	0	0	3	dsb-1(5A) (n=3)
0	0	0	0	1	0	0	3	dsb-1(5A) (n=3)
0	0	0	0	1	0	0	3	dsb-1(5A) (n=3)
0	0	0	0	1	0	0	3	dsb-1(5A) (n=3)
0	0	0	1	2	0	0	3	dsb-1(5A) (n=3)
0	0	0	1	2	0	0	3	dsb-1(5A) (n=3)
0	0	0	1	2	0	0	3	dsb-1(5A) (n=3)
0	0	0	1	2	0	0	3	dsb-1(5A) (n=3)
0	0	0	1	2	1	0	3	dsb-1(5A) (n=3)
0	0	0	2	2	2	0	3	dsb-1(5A) (n=3)
0	0	0	2	2	2	0	3	dsb-1(5A) (n=3)
0	0	0	2	2	2	0	3	dsb-1(5A) (n=3)
0	0	0	2	2	2	0	3	dsb-1(5A) (n=3)
0	0	0	2	3	3	0	3	dsb-1(5A) (n=3)
0	0	0	2	3	3	0	3	dsb-1(5A) (n=3)
0	0	0	2	3	4	0	3	dsb-1(5A) (n=3)
0	0	0	2	3	4	0	3	dsb-1(5A) (n=3)
0	0	0	3	3	4	0	3	dsb-1(5A) (n=3)
0	0	0	3	3	5	0	3	dsb-1(5A) (n=3)
0	0	0	3	4	5	0	3	dsb-1(5A) (n=3)
0	0	0	3	4	6	0	3	dsb-1(5A) (n=3)
0	0	0	3	4	6	0	3	dsb-1(5A) (n=3)
0	0	1	4	5	6	0	3	dsb-1(5A) (n=3)
0	0	1	4	5	6	0	3	dsb-1(5A) (n=3)
0	0	1	4	6	7	1	3	dsb-1(5A) (n=3)
0	0	2	4	6	8	1	3	dsb-1(5A) (n=3)
0	0	NA	4	7	8	1	3	dsb-1(5A) (n=3)
0	0	NA	5	7	9	2	3	dsb-1(5A) (n=3)
0	0	NA	6	8	10	2	3	dsb-1(5A) (n=3)
1	0	NA	6	9	11	2	3	dsb-1(5A) (n=3)
NA	0	NA	6	11	11	2	3	dsb-1(5A) (n=3)
NA	0	NA	7	12	11	2	3	dsb-1(5A) (n=3)
NA	0	NA	7	13	14	4	3	dsb-1(5A) (n=3)
NA	0	NA	7	15	14	4	3	dsb-1(5A) (n=3)
NA	0	NA	7	NA	NA	4	3	dsb-1(5A) (n=3)
NA	0	NA	NA	NA	NA	7	3	dsb-1(5A) (n=3)
NA	1	NA	NA	NA	NA	9	3	dsb-1(5A) (n=3)
NA	1	NA	NA	NA	NA	11	3	dsb-1(5A) (n=3)
NA	NA	NA	NA	NA	NA	18	3	dsb-1(5A) (n=3)
Zone 1	Zone 2	Zone 3	Zone 4	Zone 5	Zone 6	Zone 7	Gonad#	Genotype
0	0	0	0	0	0	0	1	dsb-2 (n=3)
0	0	0	0	0	0	0	1	dsb-2 (n=3)
0	0	0	0	0	0	0	1	dsb-2 (n=3)
0	0	0	0	0	0	0	1	dsb-2 (n=3)
0	0	0	0	0	0	0	1	dsb-2 (n=3)
0	0	0	0	0	0	0	1	dsb-2 (n=3)
0	0	0	0	0	0	0	1	dsb-2 (n=3)
0	0	0	0	0	0	0	1	dsb-2 (n=3)
0	0	0	0	0	0	0	1	dsb-2 (n=3)
0	0	0	0	0	0	0	1	dsb-2 (n=3)
0	0	0	0	0	0	0	1	dsb-2 (n=3)
0	0	0	0	0	0	0	1	dsb-2 (n=3)
0	0	0	0	0	0	0	1	dsb-2 (n=3)
0	0	0	0	0	0	1	1	dsb-2 (n=3)
0	0	0	0	0	0	1	1	dsb-2 (n=3)
0	0	0	0	0	0	2	1	dsb-2 (n=3)
0	0	0	0	0	0	2	1	dsb-2 (n=3)
0	0	0	0	0	0	2	1	dsb-2 (n=3)
0	0	0	0	0	0	3	1	dsb-2 (n=3)
0	0	0	0	0	0	3	1	dsb-2 (n=3)
0	0	0	0	1	0	NA	1	dsb-2 (n=3)
0	0	0	0	1	0	NA	1	dsb-2 (n=3)
0	0	0	0	1	0	NA	1	dsb-2 (n=3)
0	0	0	0	1	0	NA	1	dsb-2 (n=3)
0	0	0	0	1	1	NA	1	dsb-2 (n=3)
0	0	0	0	1	1	NA	1	dsb-2 (n=3)
0	0	0	1	1	2	NA	1	dsb-2 (n=3)
0	0	0	1	1	2	NA	1	dsb-2 (n=3)
0	0	0	1	1	2	NA	1	dsb-2 (n=3)
0	0	0	1	1	NA	NA	1	dsb-2 (n=3)
0	0	0	1	1	NA	NA	1	dsb-2 (n=3)
0	0	0	1	1	NA	NA	1	dsb-2 (n=3)
0	0	0	1	2	NA	NA	1	dsb-2 (n=3)
0	0	0	1	2	NA	NA	1	dsb-2 (n=3)
0	0	0	1	3	NA	NA	1	dsb-2 (n=3)
0	0	0	1	3	NA	NA	1	dsb-2 (n=3)
0	0	0	1	3	NA	NA	1	dsb-2 (n=3)
0	0	0	1	4	NA	NA	1	dsb-2 (n=3)
0	0	0	1	NA	NA	NA	1	dsb-2 (n=3)
0	0	0	1	NA	NA	NA	1	dsb-2 (n=3)
0	0	0	1	NA	NA	NA	1	dsb-2 (n=3)
0	0	0	1	NA	NA	NA	1	dsb-2 (n=3)
0	0	0	2	NA	NA	NA	1	dsb-2 (n=3)
0	0	0	2	NA	NA	NA	1	dsb-2 (n=3)
0	0	0	2	NA	NA	NA	1	dsb-2 (n=3)
0	0	0	2	NA	NA	NA	1	dsb-2 (n=3)
0	0	0	4	NA	NA	NA	1	dsb-2 (n=3)
0	0	0	NA	NA	NA	NA	1	dsb-2 (n=3)
0	0	1	NA	NA	NA	NA	1	dsb-2 (n=3)
0	0	1	NA	NA	NA	NA	1	dsb-2 (n=3)
0	0	1	NA	NA	NA	NA	1	dsb-2 (n=3)
0	0	NA	NA	NA	NA	NA	1	dsb-2 (n=3)
0	0	NA	NA	NA	NA	NA	1	dsb-2 (n=3)
0	1	NA	NA	NA	NA	NA	1	dsb-2 (n=3)
1	NA	NA	NA	NA	NA	NA	1	dsb-2 (n=3)
1	NA	NA	NA	NA	NA	NA	1	dsb-2 (n=3)
1	NA	NA	NA	NA	NA	NA	1	dsb-2 (n=3)
1	NA	NA	NA	NA	NA	NA	1	dsb-2 (n=3)
1	NA	NA	NA	NA	NA	NA	1	dsb-2 (n=3)
1	NA	NA	NA	NA	NA	NA	1	dsb-2 (n=3)
1	NA	NA	NA	NA	NA	NA	1	dsb-2 (n=3)
1	NA	NA	NA	NA	NA	NA	1	dsb-2 (n=3)
1	NA	NA	NA	NA	NA	NA	1	dsb-2 (n=3)
1	NA	NA	NA	NA	NA	NA	1	dsb-2 (n=3)
2	NA	NA	NA	NA	NA	NA	1	dsb-2 (n=3)
2	NA	NA	NA	NA	NA	NA	1	dsb-2 (n=3)
2	NA	NA	NA	NA	NA	NA	1	dsb-2 (n=3)
2	NA	NA	NA	NA	NA	NA	1	dsb-2 (n=3)
0	0	0	0	0	0	0	2	dsb-2 (n=3)
0	0	0	0	0	0	0	2	dsb-2 (n=3)
0	0	0	0	0	0	0	2	dsb-2 (n=3)
0	0	0	0	0	0	0	2	dsb-2 (n=3)
0	0	0	0	0	0	0	2	dsb-2 (n=3)
0	0	0	0	0	0	0	2	dsb-2 (n=3)
0	0	0	0	0	0	0	2	dsb-2 (n=3)
0	0	0	0	0	0	0	2	dsb-2 (n=3)
0	0	0	0	0	0	0	2	dsb-2 (n=3)
0	0	0	0	0	0	0	2	dsb-2 (n=3)
0	0	0	0	0	0	0	2	dsb-2 (n=3)
0	0	0	0	0	0	0	2	dsb-2 (n=3)
0	0	0	0	0	0	0	2	dsb-2 (n=3)
0	0	0	0	0	0	0	2	dsb-2 (n=3)
0	0	0	0	0	0	0	2	dsb-2 (n=3)
0	0	0	0	0	0	0	2	dsb-2 (n=3)
0	0	0	0	0	0	0	2	dsb-2 (n=3)
0	0	0	0	0	0	NA	2	dsb-2 (n=3)
0	0	0	0	0	0	NA	2	dsb-2 (n=3)
0	0	0	0	0	0	NA	2	dsb-2 (n=3)
0	0	0	0	0	0	NA	2	dsb-2 (n=3)
0	0	0	0	1	1	NA	2	dsb-2 (n=3)
NA	NA	NA	0	1	1	NA	2	dsb-2 (n=3)
NA	NA	NA	0	1	1	NA	2	dsb-2 (n=3)
NA	NA	NA	1	1	1	NA	2	dsb-2 (n=3)
NA	NA	NA	1	1	1	NA	2	dsb-2 (n=3)
NA	NA	NA	1	1	NA	NA	2	dsb-2 (n=3)
NA	NA	NA	NA	1	NA	NA	2	dsb-2 (n=3)
NA	NA	NA	NA	1	NA	NA	2	dsb-2 (n=3)
NA	NA	NA	NA	1	NA	NA	2	dsb-2 (n=3)
NA	NA	NA	NA	1	NA	NA	2	dsb-2 (n=3)
NA	NA	NA	NA	2	NA	NA	2	dsb-2 (n=3)
NA	NA	NA	NA	3	NA	NA	2	dsb-2 (n=3)
NA	NA	NA	NA	4	NA	NA	2	dsb-2 (n=3)
0	0	0	0	0	0	0	3	dsb-2 (n=3)
0	0	0	0	0	0	0	3	dsb-2 (n=3)
0	0	0	0	0	0	0	3	dsb-2 (n=3)
0	0	0	0	0	0	0	3	dsb-2 (n=3)
0	0	0	0	0	0	0	3	dsb-2 (n=3)
0	0	0	0	0	0	0	3	dsb-2 (n=3)
0	0	0	0	0	0	0	3	dsb-2 (n=3)
0	0	0	0	0	0	0	3	dsb-2 (n=3)
0	0	0	0	0	0	0	3	dsb-2 (n=3)
0	0	0	0	0	0	0	3	dsb-2 (n=3)
0	0	0	0	0	0	0	3	dsb-2 (n=3)
0	0	0	0	0	0	0	3	dsb-2 (n=3)
0	0	0	0	0	0	0	3	dsb-2 (n=3)
0	0	0	0	0	0	0	3	dsb-2 (n=3)
0	0	0	0	0	0	0	3	dsb-2 (n=3)
0	0	0	0	0	0	0	3	dsb-2 (n=3)
0	0	0	0	0	0	NA	3	dsb-2 (n=3)
0	0	0	0	0	0	NA	3	dsb-2 (n=3)
0	0	0	0	0	0	NA	3	dsb-2 (n=3)
0	0	0	0	0	0	NA	3	dsb-2 (n=3)
0	0	0	0	0	0	NA	3	dsb-2 (n=3)
0	0	0	0	0	0	NA	3	dsb-2 (n=3)
0	0	0	0	0	0	NA	3	dsb-2 (n=3)
0	0	0	0	0	0	NA	3	dsb-2 (n=3)
0	0	0	0	0	0	NA	3	dsb-2 (n=3)
0	0	0	0	0	0	NA	3	dsb-2 (n=3)
0	0	0	0	0	0	NA	3	dsb-2 (n=3)
0	0	0	0	0	0	NA	3	dsb-2 (n=3)
0	0	0	0	0	0	NA	3	dsb-2 (n=3)
0	NA	1	0	1	NA	NA	3	dsb-2 (n=3)
0	NA	1	0	1	NA	NA	3	dsb-2 (n=3)
0	NA	1	0	1	NA	NA	3	dsb-2 (n=3)
1	NA	1	1	2	NA	NA	3	dsb-2 (n=3)
3	NA	1	1	2	NA	NA	3	dsb-2 (n=3)
NA	NA	1	1	2	NA	NA	3	dsb-2 (n=3)
NA	NA	NA	1	4	NA	NA	3	dsb-2 (n=3)
NA	NA	NA	1	NA	NA	NA	3	dsb-2 (n=3)
NA	NA	NA	1	NA	NA	NA	3	dsb-2 (n=3)
NA	NA	NA	1	NA	NA	NA	3	dsb-2 (n=3)
NA	NA	NA	2	NA	NA	NA	3	dsb-2 (n=3)
Zone 1	Zone 2	Zone 3	Zone 4	Zone 5	Zone 6	Zone 7	Gonad#	Genotype
0	0	0	3	1	0	0		dsb-2;dsb-1(5A) (n=3)
0	0	0	5	2	0	0		dsb-2;dsb-1(5A) (n=3)
0	0	0	6	2	0	0		dsb-2;dsb-1(5A) (n=3)
0	0	0	6	3	0	0		dsb-2;dsb-1(5A) (n=3)
0	0	0	6	3	1	0		dsb-2;dsb-1(5A) (n=3)
0	0	0	7	4	1	0		dsb-2;dsb-1(5A) (n=3)
0	0	0	8	4	1	0		dsb-2;dsb-1(5A) (n=3)
0	0	0	8	5	1	0		dsb-2;dsb-1(5A) (n=3)
0	0	0	8	5	1	0		dsb-2;dsb-1(5A) (n=3)
0	0	0	8	6	1	0		dsb-2;dsb-1(5A) (n=3)
0	0	0	8	6	1	0		dsb-2;dsb-1(5A) (n=3)
0	0	0	8	6	3	0		dsb-2;dsb-1(5A) (n=3)
0	0	0	8	6	3	0		dsb-2;dsb-1(5A) (n=3)
0	0	0	10	6	3	0		dsb-2;dsb-1(5A) (n=3)
0	0	0	10	7	3	0		dsb-2;dsb-1(5A) (n=3)
0	0	0	10	9	4	0		dsb-2;dsb-1(5A) (n=3)
0	0	1	10	9	4	0		dsb-2;dsb-1(5A) (n=3)
0	0	1	10	9	5	0		dsb-2;dsb-1(5A) (n=3)
0	0	1	10	9	6	0		dsb-2;dsb-1(5A) (n=3)
0	0	1	11	9	8	1		dsb-2;dsb-1(5A) (n=3)
0	0	1	11	9	8	1		dsb-2;dsb-1(5A) (n=3)
1	0	1	12	9	9	1		dsb-2;dsb-1(5A) (n=3)
1	0	1	12	10	9	1		dsb-2;dsb-1(5A) (n=3)
1	0	1	12	10	10	1		dsb-2;dsb-1(5A) (n=3)
1	0	1	12	10	10	1		dsb-2;dsb-1(5A) (n=3)
1	0	1	13	10	13	1		dsb-2;dsb-1(5A) (n=3)
1	0	2	13	11	0	1		dsb-2;dsb-1(5A) (n=3)
0	0	2	13	12	0	7		dsb-2;dsb-1(5A) (n=3)
0	0	2	13	14	0	7		dsb-2;dsb-1(5A) (n=3)
0	0	2	15	16	0	7		dsb-2;dsb-1(5A) (n=3)
0	0	2	16	0	0	7		dsb-2;dsb-1(5A) (n=3)
0	0	3	17	1	0	7		dsb-2;dsb-1(5A) (n=3)
0	0	4	18	1	1	7		dsb-2;dsb-1(5A) (n=3)
0	0	5	0	1	1	7		dsb-2;dsb-1(5A) (n=3)
0	0	5	2	2	1	3		dsb-2;dsb-1(5A) (n=3)
0	0	5	3	2	1	3		dsb-2;dsb-1(5A) (n=3)
0	0	7	4	2	1	3		dsb-2;dsb-1(5A) (n=3)
0	0	10	5	3	1	3		dsb-2;dsb-1(5A) (n=3)
0	0	0	5	3	1	3		dsb-2;dsb-1(5A) (n=3)
0	0	0	6	3	2	3		dsb-2;dsb-1(5A) (n=3)
0	0	0	6	4	2	0		dsb-2;dsb-1(5A) (n=3)
0	0	0	6	4	2	0		dsb-2;dsb-1(5A) (n=3)
0	0	0	6	4	2	0		dsb-2;dsb-1(5A) (n=3)
0	0	0	6	5	2	0		dsb-2;dsb-1(5A) (n=3)
0	0	0	7	5	2	0		dsb-2;dsb-1(5A) (n=3)
0	0	0	7	6	2	0		dsb-2;dsb-1(5A) (n=3)
0	0	0	7	6	2	0		dsb-2;dsb-1(5A) (n=3)
0	0	0	7	6	3	0		dsb-2;dsb-1(5A) (n=3)
0	0	0	8	6	3	0		dsb-2;dsb-1(5A) (n=3)
0	0	0	8	7	3	0		dsb-2;dsb-1(5A) (n=3)
0	0	1	8	7	3	0		dsb-2;dsb-1(5A) (n=3)
0	0	1	8	8	3	0		dsb-2;dsb-1(5A) (n=3)
0	0	1	9	8	3	0		dsb-2;dsb-1(5A) (n=3)
0	0	1	9	8	3	0		dsb-2;dsb-1(5A) (n=3)
0	0	1	10	9	3	0		dsb-2;dsb-1(5A) (n=3)
0	0	1	11	9	4	0		dsb-2;dsb-1(5A) (n=3)
0	0	1	12	9	4	0		dsb-2;dsb-1(5A) (n=3)
1	0	1	0	1	4	0		dsb-2;dsb-1(5A) (n=3)
1	0	2	0	1	4	0		dsb-2;dsb-1(5A) (n=3)
1	1	2	1	1	0	0		dsb-2;dsb-1(5A) (n=3)
1	1	2	1	1	0	0		dsb-2;dsb-1(5A) (n=3)
1	0	2	1	1	0	0		dsb-2;dsb-1(5A) (n=3)
1	0	2	2	1	0	1		dsb-2;dsb-1(5A) (n=3)
1	0	2	2	1	0	1		dsb-2;dsb-1(5A) (n=3)
1	0	2	2	1	0	1		dsb-2;dsb-1(5A) (n=3)
1	0	2	2	2	0	1		dsb-2;dsb-1(5A) (n=3)
1	0	2	3	2	0	1		dsb-2;dsb-1(5A) (n=3)
2	0	3	3	2	0	1		dsb-2;dsb-1(5A) (n=3)
2	0	3	3	2	0	1		dsb-2;dsb-1(5A) (n=3)
2	0	3	4	3	0	1		dsb-2;dsb-1(5A) (n=3)
2	0	3	4	3	0	1		dsb-2;dsb-1(5A) (n=3)
2	0	4	4	3	1	NA		dsb-2;dsb-1(5A) (n=3)
2	0	5	4	3	1	NA		dsb-2;dsb-1(5A) (n=3)
2	0	6	4	4	1	NA		dsb-2;dsb-1(5A) (n=3)
0	0	6	5	4	1	NA		dsb-2;dsb-1(5A) (n=3)
0	0	7	5	4	1	NA		dsb-2;dsb-1(5A) (n=3)
0	0	9	5	4	1	NA		dsb-2;dsb-1(5A) (n=3)
0	0	0	5	4	1	NA		dsb-2;dsb-1(5A) (n=3)
0	0	0	6	4	1	NA		dsb-2;dsb-1(5A) (n=3)
0	0	0	6	4	1	NA		dsb-2;dsb-1(5A) (n=3)
0	0	0	6	4	1	NA		dsb-2;dsb-1(5A) (n=3)
0	0	0	6	4	1	NA		dsb-2;dsb-1(5A) (n=3)
0	0	0	6	4	1	NA		dsb-2;dsb-1(5A) (n=3)
0	0	0	6	5	1	NA		dsb-2;dsb-1(5A) (n=3)
0	0	0	6	5	2	NA		dsb-2;dsb-1(5A) (n=3)
0	0	0	7	5	2	NA		dsb-2;dsb-1(5A) (n=3)
0	0	0	7	5	2	NA		dsb-2;dsb-1(5A) (n=3)
0	0	0	9	5	2	NA		dsb-2;dsb-1(5A) (n=3)
0	0	0	10	5	2	NA		dsb-2;dsb-1(5A) (n=3)
0	0	0	17	6	3	NA		dsb-2;dsb-1(5A) (n=3)
0	0	0	NA	6	3	NA		dsb-2;dsb-1(5A) (n=3)
1	0	0	NA	6	3	NA		dsb-2;dsb-1(5A) (n=3)
1	0	0	NA	6	3	NA		dsb-2;dsb-1(5A) (n=3)
1	0	0	NA	NA	4	NA		dsb-2;dsb-1(5A) (n=3)
NA	1	0	NA	NA	5	NA		dsb-2;dsb-1(5A) (n=3)
NA	1	0	NA	NA	7	NA		dsb-2;dsb-1(5A) (n=3)
NA	1	0	NA	NA	NA	NA		dsb-2;dsb-1(5A) (n=3)
NA	1	0	NA	NA	NA	NA		dsb-2;dsb-1(5A) (n=3)
NA	0	0	NA	NA	NA	NA		dsb-2;dsb-1(5A) (n=3)
NA	0	0	NA	NA	NA	NA		dsb-2;dsb-1(5A) (n=3)
NA	0	0	NA	NA	NA	NA		dsb-2;dsb-1(5A) (n=3)
NA	0	1	NA	NA	NA	NA		dsb-2;dsb-1(5A) (n=3)
NA	0	1	NA	NA	NA	NA		dsb-2;dsb-1(5A) (n=3)
NA	0	1	NA	NA	NA	NA		dsb-2;dsb-1(5A) (n=3)
NA	0	1	NA	NA	NA	NA		dsb-2;dsb-1(5A) (n=3)
NA	0	1	NA	NA	NA	NA		dsb-2;dsb-1(5A) (n=3)
NA	0	2	NA	NA	NA	NA		dsb-2;dsb-1(5A) (n=3)
NA	0	2	NA	NA	NA	NA		dsb-2;dsb-1(5A) (n=3)
NA	0	2	NA	NA	NA	NA		dsb-2;dsb-1(5A) (n=3)
NA	0	2	NA	NA	NA	NA		dsb-2;dsb-1(5A) (n=3)
NA	0	2	NA	NA	NA	NA		dsb-2;dsb-1(5A) (n=3)
NA	0	2	NA	NA	NA	NA		dsb-2;dsb-1(5A) (n=3)
NA	0	3	NA	NA	NA	NA		dsb-2;dsb-1(5A) (n=3)
NA	0	4	NA	NA	NA	NA		dsb-2;dsb-1(5A) (n=3)
NA	0	4	NA	NA	NA	NA		dsb-2;dsb-1(5A) (n=3)
NA	0	5	NA	NA	NA	NA		dsb-2;dsb-1(5A) (n=3)
NA	0	5	NA	NA	NA	NA		dsb-2;dsb-1(5A) (n=3)
NA	0	7	NA	NA	NA	NA		dsb-2;dsb-1(5A) (n=3)
NA	0	NA	NA	NA	NA	NA		dsb-2;dsb-1(5A) (n=3)
NA	0	NA	NA	NA	NA	NA		dsb-2;dsb-1(5A) (n=3)
NA	0	NA	NA	NA	NA	NA		dsb-2;dsb-1(5A) (n=3)
NA	0	NA	NA	NA	NA	NA		dsb-2;dsb-1(5A) (n=3)
NA	0	NA	NA	NA	NA	NA		dsb-2;dsb-1(5A) (n=3)
NA	0	NA	NA	NA	NA	NA		dsb-2;dsb-1(5A) (n=3)
NA	0	NA	NA	NA	NA	NA		dsb-2;dsb-1(5A) (n=3)
NA	0	NA	NA	NA	NA	NA		dsb-2;dsb-1(5A) (n=3)
NA	0	NA	NA	NA	NA	NA		dsb-2;dsb-1(5A) (n=3)
NA	0	NA	NA	NA	NA	NA		dsb-2;dsb-1(5A) (n=3)
NA	0	NA	NA	NA	NA	NA		dsb-2;dsb-1(5A) (n=3)
NA	1	NA	NA	NA	NA	NA		dsb-2;dsb-1(5A) (n=3)
NA	2	NA	NA	NA	NA	NA		dsb-2;dsb-1(5A) (n=3)
