# Supplementary material for: Phosphoregulation of DSB-1 mediates control of meiotic double-strand break activity
Source: eLife journal article supplement (doi:10.7554/elife.77956), 2022-06-27
Supplement: supp [file elife-77956-supp-v1.zip › elife_poa_e77956_Figure_4_source_data_2.xlsx]

## Sheet: Figure 4C
Figure 4C DAPI Body numbers of each genotype
DAPI body #	dsb-2(me96)(n=82)	dsb-1(5A);dsb-2(me96)(n=83)	WT(n=73)	dsb-1(5A)(n=84)
5	0	4	5	8
6	15	73	66	71
7	24	5	2	4
8	15	1	0	1
9	18	0	0	0
10	5	0	0	0
11	5	0	0	0
12	0	0	0	0
