# Supplementary material for: Phosphoregulation of DSB-1 mediates control of meiotic double-strand break activity
Source: eLife journal article supplement (doi:10.7554/elife.77956), 2022-06-27
Supplement: supp [file elife-77956-supp-v1.zip › elife_poa_e77956_Figure_5_figure_supplement_2_source_data_1.xlsx]

## Sheet: Figure 5–figure supplement 2B
Figure 5–figure supplement 2B Quantification of RAD-51 foci of each genotype
Zone 1	Zone 2	Zone 3	Zone 4	Zone 5	Zone 6	Zone 7	Gonad#	Genotype
0	0	0	0	0	0	0	1	WT (n=2)
0	0	0	0	0	0	0	1	WT (n=2)
0	0	0	1	0	0	0	1	WT (n=2)
0	0	0	1	0	0	0	1	WT (n=2)
0	0	0	1	0	0	0	1	WT (n=2)
0	0	0	1	0	0	0	1	WT (n=2)
0	0	0	1	0	0	0	1	WT (n=2)
0	0	0	1	0	0	0	1	WT (n=2)
0	0	0	1	0	0	0	1	WT (n=2)
0	0	0	2	0	0	0	1	WT (n=2)
0	0	1	2	0	0	0	1	WT (n=2)
0	0	1	2	0	0	0	1	WT (n=2)
0	0	1	2	0	0	0	1	WT (n=2)
0	0	1	2	0	0	0	1	WT (n=2)
0	0	1	2	0	0	0	1	WT (n=2)
0	0	1	2	0	0	0	1	WT (n=2)
0	0	1	2	0	0	NA	1	WT (n=2)
0	0	1	2	0	0	NA	1	WT (n=2)
0	0	1	2	0	0	NA	1	WT (n=2)
0	0	1	2	0	0	NA	1	WT (n=2)
0	0	2	2	1	0	NA	1	WT (n=2)
0	0	2	3	1	0	NA	1	WT (n=2)
0	0	2	3	1	1	NA	1	WT (n=2)
0	0	2	3	1	1	NA	1	WT (n=2)
0	0	2	3	1	1	NA	1	WT (n=2)
0	0	2	3	1	1	NA	1	WT (n=2)
0	0	2	3	1	2	NA	1	WT (n=2)
0	0	3	3	1	2	NA	1	WT (n=2)
0	0	3	3	1	2	NA	1	WT (n=2)
0	0	3	4	2	NA	NA	1	WT (n=2)
0	0	3	4	2	NA	NA	1	WT (n=2)
0	0	3	4	2	NA	NA	1	WT (n=2)
1	0	4	4	2	NA	NA	1	WT (n=2)
NA	0	4	4	2	NA	NA	1	WT (n=2)
NA	0	4	4	3	NA	NA	1	WT (n=2)
NA	0	4	4	3	NA	NA	1	WT (n=2)
NA	0	4	4	3	NA	NA	1	WT (n=2)
NA	0	4	5	3	NA	NA	1	WT (n=2)
NA	0	4	5	3	NA	NA	1	WT (n=2)
NA	0	4	5	3	NA	NA	1	WT (n=2)
NA	0	5	5	4	NA	NA	1	WT (n=2)
NA	0	5	7	4	NA	NA	1	WT (n=2)
NA	0	5	7	17	NA	NA	1	WT (n=2)
NA	0	5	7	NA	NA	NA	1	WT (n=2)
NA	0	5	8	NA	NA	NA	1	WT (n=2)
NA	0	6	9	NA	NA	NA	1	WT (n=2)
NA	0	6	12	NA	NA	NA	1	WT (n=2)
NA	0	6	NA	NA	NA	NA	1	WT (n=2)
NA	0	6	NA	NA	NA	NA	1	WT (n=2)
NA	0	7	NA	NA	NA	NA	1	WT (n=2)
NA	0	7	NA	NA	NA	NA	1	WT (n=2)
NA	0	7	NA	NA	NA	NA	1	WT (n=2)
NA	0	7	NA	NA	NA	NA	1	WT (n=2)
NA	0	8	NA	NA	NA	NA	1	WT (n=2)
NA	0	8	NA	NA	NA	NA	1	WT (n=2)
NA	0	9	NA	NA	NA	NA	1	WT (n=2)
NA	1	NA	NA	NA	NA	NA	1	WT (n=2)
0	0	0	0	0	0	0	2	WT (n=2)
0	0	0	0	0	0	0	2	WT (n=2)
0	0	0	1	0	0	0	2	WT (n=2)
0	0	0	1	0	0	0	2	WT (n=2)
0	0	0	1	0	0	0	2	WT (n=2)
0	0	0	1	0	0	0	2	WT (n=2)
0	0	0	1	0	0	0	2	WT (n=2)
0	0	0	1	0	0	0	2	WT (n=2)
0	0	0	1	0	0	0	2	WT (n=2)
0	0	0	1	0	0	0	2	WT (n=2)
0	0	0	1	0	0	0	2	WT (n=2)
0	0	0	2	0	0	NA	2	WT (n=2)
0	0	0	2	1	0	NA	2	WT (n=2)
0	0	0	2	1	0	NA	2	WT (n=2)
0	0	0	2	1	0	NA	2	WT (n=2)
0	0	0	2	1	0	NA	2	WT (n=2)
0	0	0	2	1	0	NA	2	WT (n=2)
0	0	0	2	1	0	NA	2	WT (n=2)
0	0	0	2	1	0	NA	2	WT (n=2)
0	0	0	2	1	0	NA	2	WT (n=2)
0	0	0	2	1	0	NA	2	WT (n=2)
0	0	0	2	1	0	NA	2	WT (n=2)
0	0	0	2	1	0	NA	2	WT (n=2)
1	0	0	2	1	1	NA	2	WT (n=2)
NA	0	0	3	1	1	NA	2	WT (n=2)
NA	0	0	3	1	1	NA	2	WT (n=2)
NA	0	0	3	1	1	NA	2	WT (n=2)
NA	0	0	3	1	2	NA	2	WT (n=2)
NA	0	0	3	2	2	NA	2	WT (n=2)
NA	0	0	3	2	2	NA	2	WT (n=2)
NA	0	0	3	2	2	NA	2	WT (n=2)
NA	0	0	3	2	4	NA	2	WT (n=2)
NA	0	0	3	2	6	NA	2	WT (n=2)
NA	0	0	3	2	NA	NA	2	WT (n=2)
NA	0	0	3	2	NA	NA	2	WT (n=2)
NA	0	0	3	2	NA	NA	2	WT (n=2)
NA	0	0	3	2	NA	NA	2	WT (n=2)
NA	0	0	3	2	NA	NA	2	WT (n=2)
NA	0	0	3	2	NA	NA	2	WT (n=2)
NA	0	0	3	2	NA	NA	2	WT (n=2)
NA	0	1	3	2	NA	NA	2	WT (n=2)
NA	1	1	3	2	NA	NA	2	WT (n=2)
NA	NA	1	3	3	NA	NA	2	WT (n=2)
NA	NA	2	3	3	NA	NA	2	WT (n=2)
NA	NA	2	4	3	NA	NA	2	WT (n=2)
NA	NA	2	4	3	NA	NA	2	WT (n=2)
NA	NA	2	4	3	NA	NA	2	WT (n=2)
NA	NA	2	4	3	NA	NA	2	WT (n=2)
NA	NA	2	4	3	NA	NA	2	WT (n=2)
NA	NA	2	4	3	NA	NA	2	WT (n=2)
NA	NA	2	4	3	NA	NA	2	WT (n=2)
NA	NA	2	4	3	NA	NA	2	WT (n=2)
NA	NA	3	4	3	NA	NA	2	WT (n=2)
NA	NA	3	5	3	NA	NA	2	WT (n=2)
NA	NA	4	5	4	NA	NA	2	WT (n=2)
NA	NA	6	5	4	NA	NA	2	WT (n=2)
NA	NA	NA	5	4	NA	NA	2	WT (n=2)
NA	NA	NA	5	4	NA	NA	2	WT (n=2)
NA	NA	NA	5	4	NA	NA	2	WT (n=2)
NA	NA	NA	5	4	NA	NA	2	WT (n=2)
NA	NA	NA	5	4	NA	NA	2	WT (n=2)
NA	NA	NA	6	5	NA	NA	2	WT (n=2)
NA	NA	NA	6	5	NA	NA	2	WT (n=2)
NA	NA	NA	6	5	NA	NA	2	WT (n=2)
NA	NA	NA	6	7	NA	NA	2	WT (n=2)
NA	NA	NA	6	7	NA	NA	2	WT (n=2)
NA	NA	NA	6	NA	NA	NA	2	WT (n=2)
NA	NA	NA	7	NA	NA	NA	2	WT (n=2)
NA	NA	NA	7	NA	NA	NA	2	WT (n=2)
NA	NA	NA	7	NA	NA	NA	2	WT (n=2)
NA	NA	NA	7	NA	NA	NA	2	WT (n=2)
NA	NA	NA	7	NA	NA	NA	2	WT (n=2)
NA	NA	NA	7	NA	NA	NA	2	WT (n=2)
NA	NA	NA	8	NA	NA	NA	2	WT (n=2)
NA	NA	NA	9	NA	NA	NA	2	WT (n=2)
NA	NA	NA	11	NA	NA	NA	2	WT (n=2)
Zone 1	Zone 2	Zone 3	Zone 4	Zone 5	Zone 6	Zone 7	Gonad#	Genotype
0	0	0	0	0	0	0	1	dsb-2 (n=3)
0	0	0	0	0	0	0	1	dsb-2 (n=3)
0	0	0	0	0	0	0	1	dsb-2 (n=3)
0	0	0	0	0	0	0	1	dsb-2 (n=3)
0	0	0	0	0	0	0	1	dsb-2 (n=3)
0	0	0	0	0	0	0	1	dsb-2 (n=3)
0	0	0	0	0	0	0	1	dsb-2 (n=3)
0	0	0	0	0	0	0	1	dsb-2 (n=3)
0	0	0	0	0	0	0	1	dsb-2 (n=3)
0	0	0	0	0	0	0	1	dsb-2 (n=3)
0	0	0	0	0	0	0	1	dsb-2 (n=3)
0	0	0	0	0	0	0	1	dsb-2 (n=3)
0	0	0	0	0	0	0	1	dsb-2 (n=3)
0	0	0	0	0	0	1	1	dsb-2 (n=3)
0	0	0	0	0	0	1	1	dsb-2 (n=3)
0	0	0	0	0	0	2	1	dsb-2 (n=3)
0	0	0	0	0	0	2	1	dsb-2 (n=3)
0	0	0	0	0	0	2	1	dsb-2 (n=3)
0	0	0	0	0	0	3	1	dsb-2 (n=3)
0	0	0	0	0	0	3	1	dsb-2 (n=3)
0	0	0	0	1	0	NA	1	dsb-2 (n=3)
0	0	0	0	1	0	NA	1	dsb-2 (n=3)
0	0	0	0	1	0	NA	1	dsb-2 (n=3)
0	0	0	0	1	0	NA	1	dsb-2 (n=3)
0	0	0	0	1	1	NA	1	dsb-2 (n=3)
0	0	0	0	1	1	NA	1	dsb-2 (n=3)
0	0	0	1	1	2	NA	1	dsb-2 (n=3)
0	0	0	1	1	2	NA	1	dsb-2 (n=3)
0	0	0	1	1	2	NA	1	dsb-2 (n=3)
0	0	0	1	1	NA	NA	1	dsb-2 (n=3)
0	0	0	1	1	NA	NA	1	dsb-2 (n=3)
0	0	0	1	1	NA	NA	1	dsb-2 (n=3)
0	0	0	1	2	NA	NA	1	dsb-2 (n=3)
0	0	0	1	2	NA	NA	1	dsb-2 (n=3)
0	0	0	1	3	NA	NA	1	dsb-2 (n=3)
0	0	0	1	3	NA	NA	1	dsb-2 (n=3)
0	0	0	1	3	NA	NA	1	dsb-2 (n=3)
0	0	0	1	4	NA	NA	1	dsb-2 (n=3)
0	0	0	1	NA	NA	NA	1	dsb-2 (n=3)
0	0	0	1	NA	NA	NA	1	dsb-2 (n=3)
0	0	0	1	NA	NA	NA	1	dsb-2 (n=3)
0	0	0	1	NA	NA	NA	1	dsb-2 (n=3)
0	0	0	2	NA	NA	NA	1	dsb-2 (n=3)
0	0	0	2	NA	NA	NA	1	dsb-2 (n=3)
0	0	0	2	NA	NA	NA	1	dsb-2 (n=3)
0	0	0	2	NA	NA	NA	1	dsb-2 (n=3)
0	0	0	4	NA	NA	NA	1	dsb-2 (n=3)
0	0	0	NA	NA	NA	NA	1	dsb-2 (n=3)
0	0	1	NA	NA	NA	NA	1	dsb-2 (n=3)
0	0	1	NA	NA	NA	NA	1	dsb-2 (n=3)
0	0	1	NA	NA	NA	NA	1	dsb-2 (n=3)
0	0	NA	NA	NA	NA	NA	1	dsb-2 (n=3)
0	0	NA	NA	NA	NA	NA	1	dsb-2 (n=3)
0	1	NA	NA	NA	NA	NA	1	dsb-2 (n=3)
1	NA	NA	NA	NA	NA	NA	1	dsb-2 (n=3)
1	NA	NA	NA	NA	NA	NA	1	dsb-2 (n=3)
1	NA	NA	NA	NA	NA	NA	1	dsb-2 (n=3)
1	NA	NA	NA	NA	NA	NA	1	dsb-2 (n=3)
1	NA	NA	NA	NA	NA	NA	1	dsb-2 (n=3)
1	NA	NA	NA	NA	NA	NA	1	dsb-2 (n=3)
1	NA	NA	NA	NA	NA	NA	1	dsb-2 (n=3)
1	NA	NA	NA	NA	NA	NA	1	dsb-2 (n=3)
1	NA	NA	NA	NA	NA	NA	1	dsb-2 (n=3)
1	NA	NA	NA	NA	NA	NA	1	dsb-2 (n=3)
2	NA	NA	NA	NA	NA	NA	1	dsb-2 (n=3)
2	NA	NA	NA	NA	NA	NA	1	dsb-2 (n=3)
2	NA	NA	NA	NA	NA	NA	1	dsb-2 (n=3)
2	NA	NA	NA	NA	NA	NA	1	dsb-2 (n=3)
0	0	0	0	0	0	0	2	dsb-2 (n=3)
0	0	0	0	0	0	0	2	dsb-2 (n=3)
0	0	0	0	0	0	0	2	dsb-2 (n=3)
0	0	0	0	0	0	0	2	dsb-2 (n=3)
0	0	0	0	0	0	0	2	dsb-2 (n=3)
0	0	0	0	0	0	0	2	dsb-2 (n=3)
0	0	0	0	0	0	0	2	dsb-2 (n=3)
0	0	0	0	0	0	0	2	dsb-2 (n=3)
0	0	0	0	0	0	0	2	dsb-2 (n=3)
0	0	0	0	0	0	0	2	dsb-2 (n=3)
0	0	0	0	0	0	0	2	dsb-2 (n=3)
0	0	0	0	0	0	0	2	dsb-2 (n=3)
0	0	0	0	0	0	0	2	dsb-2 (n=3)
0	0	0	0	0	0	0	2	dsb-2 (n=3)
0	0	0	0	0	0	0	2	dsb-2 (n=3)
0	0	0	0	0	0	0	2	dsb-2 (n=3)
0	0	0	0	0	0	0	2	dsb-2 (n=3)
0	0	0	0	0	0	NA	2	dsb-2 (n=3)
0	0	0	0	0	0	NA	2	dsb-2 (n=3)
0	0	0	0	0	0	NA	2	dsb-2 (n=3)
0	0	0	0	0	0	NA	2	dsb-2 (n=3)
0	0	0	0	1	1	NA	2	dsb-2 (n=3)
NA	NA	NA	0	1	1	NA	2	dsb-2 (n=3)
NA	NA	NA	0	1	1	NA	2	dsb-2 (n=3)
NA	NA	NA	1	1	1	NA	2	dsb-2 (n=3)
NA	NA	NA	1	1	1	NA	2	dsb-2 (n=3)
NA	NA	NA	1	1	NA	NA	2	dsb-2 (n=3)
NA	NA	NA	NA	1	NA	NA	2	dsb-2 (n=3)
NA	NA	NA	NA	1	NA	NA	2	dsb-2 (n=3)
NA	NA	NA	NA	1	NA	NA	2	dsb-2 (n=3)
NA	NA	NA	NA	1	NA	NA	2	dsb-2 (n=3)
NA	NA	NA	NA	2	NA	NA	2	dsb-2 (n=3)
NA	NA	NA	NA	3	NA	NA	2	dsb-2 (n=3)
NA	NA	NA	NA	4	NA	NA	2	dsb-2 (n=3)
0	0	0	0	0	0	0	3	dsb-2 (n=3)
0	0	0	0	0	0	0	3	dsb-2 (n=3)
0	0	0	0	0	0	0	3	dsb-2 (n=3)
0	0	0	0	0	0	0	3	dsb-2 (n=3)
0	0	0	0	0	0	0	3	dsb-2 (n=3)
0	0	0	0	0	0	0	3	dsb-2 (n=3)
0	0	0	0	0	0	0	3	dsb-2 (n=3)
0	0	0	0	0	0	0	3	dsb-2 (n=3)
0	0	0	0	0	0	0	3	dsb-2 (n=3)
0	0	0	0	0	0	0	3	dsb-2 (n=3)
0	0	0	0	0	0	0	3	dsb-2 (n=3)
0	0	0	0	0	0	0	3	dsb-2 (n=3)
0	0	0	0	0	0	0	3	dsb-2 (n=3)
0	0	0	0	0	0	0	3	dsb-2 (n=3)
0	0	0	0	0	0	0	3	dsb-2 (n=3)
0	0	0	0	0	0	0	3	dsb-2 (n=3)
0	0	0	0	0	0	NA	3	dsb-2 (n=3)
0	0	0	0	0	0	NA	3	dsb-2 (n=3)
0	0	0	0	0	0	NA	3	dsb-2 (n=3)
0	0	0	0	0	0	NA	3	dsb-2 (n=3)
0	0	0	0	0	0	NA	3	dsb-2 (n=3)
0	0	0	0	0	0	NA	3	dsb-2 (n=3)
0	0	0	0	0	0	NA	3	dsb-2 (n=3)
0	0	0	0	0	0	NA	3	dsb-2 (n=3)
0	0	0	0	0	0	NA	3	dsb-2 (n=3)
0	0	0	0	0	0	NA	3	dsb-2 (n=3)
0	0	0	0	0	0	NA	3	dsb-2 (n=3)
0	0	0	0	0	0	NA	3	dsb-2 (n=3)
0	0	0	0	0	0	NA	3	dsb-2 (n=3)
0	NA	1	0	1	NA	NA	3	dsb-2 (n=3)
0	NA	1	0	1	NA	NA	3	dsb-2 (n=3)
0	NA	1	0	1	NA	NA	3	dsb-2 (n=3)
1	NA	1	1	2	NA	NA	3	dsb-2 (n=3)
3	NA	1	1	2	NA	NA	3	dsb-2 (n=3)
NA	NA	1	1	2	NA	NA	3	dsb-2 (n=3)
NA	NA	NA	1	4	NA	NA	3	dsb-2 (n=3)
NA	NA	NA	1	NA	NA	NA	3	dsb-2 (n=3)
NA	NA	NA	1	NA	NA	NA	3	dsb-2 (n=3)
NA	NA	NA	1	NA	NA	NA	3	dsb-2 (n=3)
NA	NA	NA	2	NA	NA	NA	3	dsb-2 (n=3)
Zone 1	Zone 2	Zone 3	Zone 4	Zone 5	Zone 6	Zone 7	Gonad#	Genotype
0	0	0	0	0	0	0	1	pph-4.1(n=4)
0	0	0	0	0	0	0	1	pph-4.1(n=4)
0	0	0	0	0	0	0	1	pph-4.1(n=4)
0	0	0	0	0	0	0	1	pph-4.1(n=4)
0	0	0	0	0	0	0	1	pph-4.1(n=4)
0	0	0	0	0	0	0	1	pph-4.1(n=4)
0	0	0	0	0	0	0	1	pph-4.1(n=4)
0	0	0	0	0	0	1	1	pph-4.1(n=4)
0	0	0	0	0	0	1	1	pph-4.1(n=4)
0	0	0	0	0	0	1	1	pph-4.1(n=4)
0	0	0	0	0	0	1	1	pph-4.1(n=4)
0	0	0	0	0	0	2	1	pph-4.1(n=4)
0	0	0	0	0	0	2	1	pph-4.1(n=4)
0	0	0	0	0	0	2	1	pph-4.1(n=4)
0	0	0	0	0	0	NA	1	pph-4.1(n=4)
0	0	0	0	0	0	NA	1	pph-4.1(n=4)
0	0	0	0	0	0	NA	1	pph-4.1(n=4)
0	0	0	0	0	0	NA	1	pph-4.1(n=4)
0	0	0	0	0	0	NA	1	pph-4.1(n=4)
0	0	0	0	0	0	NA	1	pph-4.1(n=4)
0	0	0	0	0	0	NA	1	pph-4.1(n=4)
0	0	0	0	0	0	NA	1	pph-4.1(n=4)
0	0	0	0	0	0	NA	1	pph-4.1(n=4)
0	0	0	0	0	0	NA	1	pph-4.1(n=4)
0	0	0	0	0	0	NA	1	pph-4.1(n=4)
0	0	0	0	0	0	NA	1	pph-4.1(n=4)
0	0	0	0	0	0	NA	1	pph-4.1(n=4)
0	0	0	0	0	0	NA	1	pph-4.1(n=4)
0	0	0	0	0	0	NA	1	pph-4.1(n=4)
1	0	0	0	0	0	NA	1	pph-4.1(n=4)
1	0	0	0	1	0	NA	1	pph-4.1(n=4)
1	0	0	0	1	0	NA	1	pph-4.1(n=4)
1	0	0	0	1	0	NA	1	pph-4.1(n=4)
1	0	0	0	1	0	NA	1	pph-4.1(n=4)
1	0	0	0	2	0	NA	1	pph-4.1(n=4)
NA	0	0	0	2	1	NA	1	pph-4.1(n=4)
NA	0	0	0	2	1	NA	1	pph-4.1(n=4)
NA	0	0	0	2	1	NA	1	pph-4.1(n=4)
NA	0	0	0	2	1	NA	1	pph-4.1(n=4)
NA	0	0	0	2	1	NA	1	pph-4.1(n=4)
NA	0	0	0	2	1	NA	1	pph-4.1(n=4)
NA	0	0	0	2	1	NA	1	pph-4.1(n=4)
NA	0	0	0	3	1	NA	1	pph-4.1(n=4)
NA	0	0	0	4	2	NA	1	pph-4.1(n=4)
NA	0	0	0	4	3	NA	1	pph-4.1(n=4)
NA	0	0	0	4	NA	NA	1	pph-4.1(n=4)
NA	0	0	0	4	NA	NA	1	pph-4.1(n=4)
NA	0	0	0	NA	NA	NA	1	pph-4.1(n=4)
NA	0	0	0	NA	NA	NA	1	pph-4.1(n=4)
NA	0	0	0	NA	NA	NA	1	pph-4.1(n=4)
NA	0	0	0	NA	NA	NA	1	pph-4.1(n=4)
NA	0	0	1	NA	NA	NA	1	pph-4.1(n=4)
NA	0	0	1	NA	NA	NA	1	pph-4.1(n=4)
NA	0	0	NA	NA	NA	NA	1	pph-4.1(n=4)
NA	0	0	NA	NA	NA	NA	1	pph-4.1(n=4)
NA	0	0	NA	NA	NA	NA	1	pph-4.1(n=4)
NA	1	0	NA	NA	NA	NA	1	pph-4.1(n=4)
NA	1	0	NA	NA	NA	NA	1	pph-4.1(n=4)
NA	1	0	NA	NA	NA	NA	1	pph-4.1(n=4)
NA	2	0	NA	NA	NA	NA	1	pph-4.1(n=4)
NA	NA	0	NA	NA	NA	NA	1	pph-4.1(n=4)
NA	NA	0	NA	NA	NA	NA	1	pph-4.1(n=4)
NA	NA	0	NA	NA	NA	NA	1	pph-4.1(n=4)
NA	NA	0	NA	NA	NA	NA	1	pph-4.1(n=4)
NA	NA	0	NA	NA	NA	NA	1	pph-4.1(n=4)
NA	NA	0	NA	NA	NA	NA	1	pph-4.1(n=4)
NA	NA	1	NA	NA	NA	NA	1	pph-4.1(n=4)
0	0	0	0	0	0	0	2	pph-4.1(n=4)
0	0	0	0	0	0	0	2	pph-4.1(n=4)
0	0	0	0	0	0	0	2	pph-4.1(n=4)
0	0	0	0	0	0	0	2	pph-4.1(n=4)
0	0	0	0	0	0	0	2	pph-4.1(n=4)
0	0	0	0	0	0	0	2	pph-4.1(n=4)
0	0	0	0	0	0	0	2	pph-4.1(n=4)
0	0	0	0	0	1	0	2	pph-4.1(n=4)
0	0	0	0	0	1	0	2	pph-4.1(n=4)
0	0	0	0	0	1	0	2	pph-4.1(n=4)
0	0	0	0	0	1	0	2	pph-4.1(n=4)
0	0	0	0	0	1	0	2	pph-4.1(n=4)
0	0	0	0	1	1	0	2	pph-4.1(n=4)
0	0	0	0	1	1	0	2	pph-4.1(n=4)
0	0	0	0	1	1	0	2	pph-4.1(n=4)
0	0	0	0	1	1	0	2	pph-4.1(n=4)
0	0	0	0	1	2	1	2	pph-4.1(n=4)
0	0	0	0	1	2	1	2	pph-4.1(n=4)
0	0	0	0	1	2	1	2	pph-4.1(n=4)
0	0	0	0	1	2	2	2	pph-4.1(n=4)
0	0	0	0	1	2	NA	2	pph-4.1(n=4)
0	0	0	0	1	2	NA	2	pph-4.1(n=4)
0	0	0	0	2	2	NA	2	pph-4.1(n=4)
0	0	0	0	2	3	NA	2	pph-4.1(n=4)
0	0	0	0	2	3	NA	2	pph-4.1(n=4)
0	0	0	0	2	3	NA	2	pph-4.1(n=4)
0	0	0	0	2	3	NA	2	pph-4.1(n=4)
0	0	0	0	2	3	NA	2	pph-4.1(n=4)
0	0	0	0	3	3	NA	2	pph-4.1(n=4)
0	0	0	0	3	4	NA	2	pph-4.1(n=4)
0	0	0	0	4	4	NA	2	pph-4.1(n=4)
0	0	0	0	5	4	NA	2	pph-4.1(n=4)
0	0	0	0	6	NA	NA	2	pph-4.1(n=4)
0	0	0	0	6	NA	NA	2	pph-4.1(n=4)
0	0	0	0	NA	NA	NA	2	pph-4.1(n=4)
0	0	0	0	NA	NA	NA	2	pph-4.1(n=4)
0	0	0	1	NA	NA	NA	2	pph-4.1(n=4)
0	0	0	1	NA	NA	NA	2	pph-4.1(n=4)
0	0	0	1	NA	NA	NA	2	pph-4.1(n=4)
0	0	0	1	NA	NA	NA	2	pph-4.1(n=4)
0	0	0	NA	NA	NA	NA	2	pph-4.1(n=4)
1	0	0	NA	NA	NA	NA	2	pph-4.1(n=4)
1	1	0	NA	NA	NA	NA	2	pph-4.1(n=4)
1	1	0	NA	NA	NA	NA	2	pph-4.1(n=4)
2	1	0	NA	NA	NA	NA	2	pph-4.1(n=4)
NA	NA	0	NA	NA	NA	NA	2	pph-4.1(n=4)
NA	NA	1	NA	NA	NA	NA	2	pph-4.1(n=4)
NA	NA	2	NA	NA	NA	NA	2	pph-4.1(n=4)
0	0	0	0	0	0	0	3	pph-4.1(n=4)
0	0	0	0	0	0	0	3	pph-4.1(n=4)
0	0	0	0	0	0	0	3	pph-4.1(n=4)
0	0	0	0	0	0	0	3	pph-4.1(n=4)
0	0	0	0	0	0	0	3	pph-4.1(n=4)
0	0	0	0	0	0	0	3	pph-4.1(n=4)
0	0	0	0	0	0	0	3	pph-4.1(n=4)
0	0	0	0	0	0	0	3	pph-4.1(n=4)
0	0	0	0	0	0	0	3	pph-4.1(n=4)
0	0	0	0	0	0	0	3	pph-4.1(n=4)
0	0	0	0	0	0	0	3	pph-4.1(n=4)
0	0	0	0	0	0	0	3	pph-4.1(n=4)
0	0	0	0	0	0	0	3	pph-4.1(n=4)
0	0	0	0	0	0	0	3	pph-4.1(n=4)
0	0	0	0	0	0	0	3	pph-4.1(n=4)
0	0	0	0	0	0	1	3	pph-4.1(n=4)
0	0	0	0	0	0	1	3	pph-4.1(n=4)
0	0	0	0	0	1	1	3	pph-4.1(n=4)
0	0	0	0	1	1	1	3	pph-4.1(n=4)
0	0	0	0	1	1	3	3	pph-4.1(n=4)
0	0	0	0	1	1	5	3	pph-4.1(n=4)
0	0	0	0	1	2	NA	3	pph-4.1(n=4)
0	0	0	0	1	3	NA	3	pph-4.1(n=4)
0	0	0	0	1	3	NA	3	pph-4.1(n=4)
0	0	0	0	1	4	NA	3	pph-4.1(n=4)
1	0	0	0	1	4	NA	3	pph-4.1(n=4)
NA	0	0	0	1	4	NA	3	pph-4.1(n=4)
NA	0	0	0	1	5	NA	3	pph-4.1(n=4)
NA	0	0	0	1	5	NA	3	pph-4.1(n=4)
NA	0	0	0	1	5	NA	3	pph-4.1(n=4)
NA	0	0	0	1	5	NA	3	pph-4.1(n=4)
NA	0	0	0	2	6	NA	3	pph-4.1(n=4)
NA	0	0	0	2	6	NA	3	pph-4.1(n=4)
NA	0	0	0	2	7	NA	3	pph-4.1(n=4)
NA	0	0	0	2	8	NA	3	pph-4.1(n=4)
NA	0	0	0	2	8	NA	3	pph-4.1(n=4)
NA	1	0	0	3	9	NA	3	pph-4.1(n=4)
NA	NA	0	0	3	NA	NA	3	pph-4.1(n=4)
NA	NA	0	0	4	NA	NA	3	pph-4.1(n=4)
NA	NA	1	1	6	NA	NA	3	pph-4.1(n=4)
NA	NA	2	1	NA	NA	NA	3	pph-4.1(n=4)
NA	NA	NA	1	NA	NA	NA	3	pph-4.1(n=4)
NA	NA	NA	1	NA	NA	NA	3	pph-4.1(n=4)
NA	NA	NA	1	NA	NA	NA	3	pph-4.1(n=4)
NA	NA	NA	2	NA	NA	NA	3	pph-4.1(n=4)
NA	NA	NA	2	NA	NA	NA	3	pph-4.1(n=4)
0	0	0	0	0	0	0	4	pph-4.1(n=4)
0	0	0	0	0	0	0	4	pph-4.1(n=4)
0	0	0	0	0	0	0	4	pph-4.1(n=4)
0	0	0	0	0	0	0	4	pph-4.1(n=4)
0	0	0	0	0	0	0	4	pph-4.1(n=4)
0	0	0	0	0	0	0	4	pph-4.1(n=4)
0	0	0	0	0	0	0	4	pph-4.1(n=4)
0	0	0	0	0	0	0	4	pph-4.1(n=4)
0	0	0	0	0	0	0	4	pph-4.1(n=4)
0	0	0	0	0	0	0	4	pph-4.1(n=4)
0	0	0	0	0	0	0	4	pph-4.1(n=4)
0	0	0	0	0	0	0	4	pph-4.1(n=4)
0	0	0	0	0	0	0	4	pph-4.1(n=4)
0	0	0	0	0	0	0	4	pph-4.1(n=4)
0	0	0	0	0	0	0	4	pph-4.1(n=4)
0	0	0	0	0	0	0	4	pph-4.1(n=4)
0	0	0	0	0	0	1	4	pph-4.1(n=4)
0	0	0	0	0	0	1	4	pph-4.1(n=4)
0	0	0	0	0	0	1	4	pph-4.1(n=4)
0	0	0	0	0	0	NA	4	pph-4.1(n=4)
0	0	0	0	0	0	NA	4	pph-4.1(n=4)
0	0	0	0	0	0	NA	4	pph-4.1(n=4)
0	0	0	0	0	1	NA	4	pph-4.1(n=4)
0	0	0	0	0	1	NA	4	pph-4.1(n=4)
0	0	0	0	0	1	NA	4	pph-4.1(n=4)
0	0	0	0	0	1	NA	4	pph-4.1(n=4)
0	0	0	0	0	1	NA	4	pph-4.1(n=4)
0	0	0	0	0	1	NA	4	pph-4.1(n=4)
0	0	0	0	0	1	NA	4	pph-4.1(n=4)
0	0	0	0	0	2	NA	4	pph-4.1(n=4)
0	0	0	0	0	2	NA	4	pph-4.1(n=4)
0	0	0	0	0	2	NA	4	pph-4.1(n=4)
0	NA	0	0	0	3	NA	4	pph-4.1(n=4)
0	NA	0	0	0	4	NA	4	pph-4.1(n=4)
0	NA	0	0	0	8	NA	4	pph-4.1(n=4)
0	NA	0	0	1	NA	NA	4	pph-4.1(n=4)
0	NA	0	0	1	NA	NA	4	pph-4.1(n=4)
0	NA	0	0	1	NA	NA	4	pph-4.1(n=4)
1	NA	0	0	1	NA	NA	4	pph-4.1(n=4)
NA	NA	0	0	1	NA	NA	4	pph-4.1(n=4)
NA	NA	0	0	2	NA	NA	4	pph-4.1(n=4)
NA	NA	0	0	2	NA	NA	4	pph-4.1(n=4)
NA	NA	1	0	2	NA	NA	4	pph-4.1(n=4)
NA	NA	1	0	3	NA	NA	4	pph-4.1(n=4)
NA	NA	1	0	3	NA	NA	4	pph-4.1(n=4)
NA	NA	NA	0	4	NA	NA	4	pph-4.1(n=4)
NA	NA	NA	0	NA	NA	NA	4	pph-4.1(n=4)
NA	NA	NA	1	NA	NA	NA	4	pph-4.1(n=4)
NA	NA	NA	1	NA	NA	NA	4	pph-4.1(n=4)
Zone 1	Zone 2	Zone 3	Zone 4	Zone 5	Zone 6	Zone 7	Gonad#	Genotype
0	0	0	0	0	0	0	1	dsb1(1A) (n=3)
0	0	0	0	0	0	0	1	dsb1(1A) (n=3)
0	0	0	1	0	0	0	1	dsb1(1A) (n=3)
0	0	0	1	0	0	NA	1	dsb1(1A) (n=3)
0	0	0	2	0	0	NA	1	dsb1(1A) (n=3)
0	0	0	2	1	0	NA	1	dsb1(1A) (n=3)
0	0	0	2	1	0	NA	1	dsb1(1A) (n=3)
0	0	0	2	1	0	NA	1	dsb1(1A) (n=3)
0	0	0	2	1	0	NA	1	dsb1(1A) (n=3)
0	0	0	2	1	0	NA	1	dsb1(1A) (n=3)
0	0	0	2	1	0	NA	1	dsb1(1A) (n=3)
0	0	0	2	1	0	NA	1	dsb1(1A) (n=3)
0	0	0	3	2	0	NA	1	dsb1(1A) (n=3)
0	0	0	3	2	0	NA	1	dsb1(1A) (n=3)
0	0	0	3	2	0	NA	1	dsb1(1A) (n=3)
0	0	1	3	2	0	NA	1	dsb1(1A) (n=3)
0	0	1	3	2	0	NA	1	dsb1(1A) (n=3)
0	0	1	3	2	0	NA	1	dsb1(1A) (n=3)
0	0	2	3	2	0	NA	1	dsb1(1A) (n=3)
0	0	2	4	2	0	NA	1	dsb1(1A) (n=3)
0	0	2	4	2	0	NA	1	dsb1(1A) (n=3)
0	0	2	4	3	1	NA	1	dsb1(1A) (n=3)
0	0	2	4	3	2	NA	1	dsb1(1A) (n=3)
0	0	2	4	3	3	NA	1	dsb1(1A) (n=3)
0	0	3	4	3	NA	NA	1	dsb1(1A) (n=3)
0	0	3	4	3	NA	NA	1	dsb1(1A) (n=3)
0	0	3	4	3	NA	NA	1	dsb1(1A) (n=3)
0	0	3	5	3	NA	NA	1	dsb1(1A) (n=3)
0	0	4	5	3	NA	NA	1	dsb1(1A) (n=3)
0	0	4	5	3	NA	NA	1	dsb1(1A) (n=3)
0	0	4	5	4	NA	NA	1	dsb1(1A) (n=3)
0	0	4	5	4	NA	NA	1	dsb1(1A) (n=3)
0	0	5	5	4	NA	NA	1	dsb1(1A) (n=3)
0	0	5	5	4	NA	NA	1	dsb1(1A) (n=3)
0	0	5	5	4	NA	NA	1	dsb1(1A) (n=3)
0	0	5	6	5	NA	NA	1	dsb1(1A) (n=3)
0	0	5	6	NA	NA	NA	1	dsb1(1A) (n=3)
0	0	5	6	NA	NA	NA	1	dsb1(1A) (n=3)
0	0	5	6	NA	NA	NA	1	dsb1(1A) (n=3)
0	0	6	7	NA	NA	NA	1	dsb1(1A) (n=3)
0	0	6	7	NA	NA	NA	1	dsb1(1A) (n=3)
1	0	6	7	NA	NA	NA	1	dsb1(1A) (n=3)
1	0	6	7	NA	NA	NA	1	dsb1(1A) (n=3)
1	0	6	8	NA	NA	NA	1	dsb1(1A) (n=3)
NA	0	6	8	NA	NA	NA	1	dsb1(1A) (n=3)
NA	0	7	8	NA	NA	NA	1	dsb1(1A) (n=3)
NA	0	7	9	NA	NA	NA	1	dsb1(1A) (n=3)
NA	0	7	9	NA	NA	NA	1	dsb1(1A) (n=3)
NA	0	7	9	NA	NA	NA	1	dsb1(1A) (n=3)
NA	0	7	NA	NA	NA	NA	1	dsb1(1A) (n=3)
NA	0	7	NA	NA	NA	NA	1	dsb1(1A) (n=3)
NA	0	8	NA	NA	NA	NA	1	dsb1(1A) (n=3)
NA	0	8	NA	NA	NA	NA	1	dsb1(1A) (n=3)
NA	0	8	NA	NA	NA	NA	1	dsb1(1A) (n=3)
NA	1	9	NA	NA	NA	NA	1	dsb1(1A) (n=3)
NA	1	9	NA	NA	NA	NA	1	dsb1(1A) (n=3)
NA	1	NA	NA	NA	NA	NA	1	dsb1(1A) (n=3)
NA	1	NA	NA	NA	NA	NA	1	dsb1(1A) (n=3)
NA	1	NA	NA	NA	NA	NA	1	dsb1(1A) (n=3)
0	0	0	0	0	0	0	2	dsb1(1A) (n=3)
0	0	0	0	0	0	0	2	dsb1(1A) (n=3)
0	0	0	0	0	0	0	2	dsb1(1A) (n=3)
0	0	0	0	0	0	0	2	dsb1(1A) (n=3)
0	0	0	0	0	0	0	2	dsb1(1A) (n=3)
0	0	1	0	0	0	0	2	dsb1(1A) (n=3)
0	0	1	1	0	0	0	2	dsb1(1A) (n=3)
0	0	1	1	0	0	0	2	dsb1(1A) (n=3)
0	0	1	1	0	0	NA	2	dsb1(1A) (n=3)
0	0	1	1	0	0	NA	2	dsb1(1A) (n=3)
0	0	1	1	1	0	NA	2	dsb1(1A) (n=3)
0	0	1	1	1	0	NA	2	dsb1(1A) (n=3)
0	0	2	1	1	0	NA	2	dsb1(1A) (n=3)
0	0	2	2	1	0	NA	2	dsb1(1A) (n=3)
0	0	2	2	1	0	NA	2	dsb1(1A) (n=3)
0	0	2	2	1	0	NA	2	dsb1(1A) (n=3)
0	0	2	2	1	0	NA	2	dsb1(1A) (n=3)
0	0	2	2	1	0	NA	2	dsb1(1A) (n=3)
0	0	2	2	1	0	NA	2	dsb1(1A) (n=3)
0	0	2	2	1	0	NA	2	dsb1(1A) (n=3)
0	0	2	2	1	0	NA	2	dsb1(1A) (n=3)
0	0	3	3	1	0	NA	2	dsb1(1A) (n=3)
0	0	3	3	1	0	NA	2	dsb1(1A) (n=3)
0	0	3	3	1	0	NA	2	dsb1(1A) (n=3)
0	0	3	3	2	1	NA	2	dsb1(1A) (n=3)
0	0	3	3	2	1	NA	2	dsb1(1A) (n=3)
0	0	3	3	2	1	NA	2	dsb1(1A) (n=3)
0	0	3	3	2	1	NA	2	dsb1(1A) (n=3)
0	0	3	3	2	1	NA	2	dsb1(1A) (n=3)
0	0	4	3	2	3	NA	2	dsb1(1A) (n=3)
0	0	4	3	2	NA	NA	2	dsb1(1A) (n=3)
0	0	4	3	2	NA	NA	2	dsb1(1A) (n=3)
0	0	4	3	2	NA	NA	2	dsb1(1A) (n=3)
0	0	4	3	3	NA	NA	2	dsb1(1A) (n=3)
0	0	4	4	3	NA	NA	2	dsb1(1A) (n=3)
0	0	4	4	4	NA	NA	2	dsb1(1A) (n=3)
0	0	4	4	4	NA	NA	2	dsb1(1A) (n=3)
0	0	5	4	4	NA	NA	2	dsb1(1A) (n=3)
1	0	5	4	4	NA	NA	2	dsb1(1A) (n=3)
1	0	5	4	5	NA	NA	2	dsb1(1A) (n=3)
1	0	5	4	5	NA	NA	2	dsb1(1A) (n=3)
1	0	5	4	5	NA	NA	2	dsb1(1A) (n=3)
NA	0	5	4	5	NA	NA	2	dsb1(1A) (n=3)
NA	0	5	4	5	NA	NA	2	dsb1(1A) (n=3)
NA	1	6	5	NA	NA	NA	2	dsb1(1A) (n=3)
NA	1	6	5	NA	NA	NA	2	dsb1(1A) (n=3)
NA	1	6	5	NA	NA	NA	2	dsb1(1A) (n=3)
NA	2	6	5	NA	NA	NA	2	dsb1(1A) (n=3)
NA	2	6	5	NA	NA	NA	2	dsb1(1A) (n=3)
NA	NA	7	5	NA	NA	NA	2	dsb1(1A) (n=3)
NA	NA	7	6	NA	NA	NA	2	dsb1(1A) (n=3)
NA	NA	7	6	NA	NA	NA	2	dsb1(1A) (n=3)
NA	NA	7	7	NA	NA	NA	2	dsb1(1A) (n=3)
NA	NA	8	7	NA	NA	NA	2	dsb1(1A) (n=3)
NA	NA	9	NA	NA	NA	NA	2	dsb1(1A) (n=3)
0	0	0	0	0	0	0	3	dsb1(1A) (n=3)
0	0	0	0	0	0	0	3	dsb1(1A) (n=3)
0	0	0	0	0	0	0	3	dsb1(1A) (n=3)
0	0	0	0	0	0	0	3	dsb1(1A) (n=3)
0	0	0	0	0	0	0	3	dsb1(1A) (n=3)
0	0	0	0	0	0	0	3	dsb1(1A) (n=3)
0	0	0	0	0	0	0	3	dsb1(1A) (n=3)
0	0	1	0	0	0	0	3	dsb1(1A) (n=3)
0	0	1	0	0	0	0	3	dsb1(1A) (n=3)
0	0	1	1	0	0	0	3	dsb1(1A) (n=3)
0	0	1	1	0	0	NA	3	dsb1(1A) (n=3)
0	0	1	1	0	0	NA	3	dsb1(1A) (n=3)
0	0	1	1	0	0	NA	3	dsb1(1A) (n=3)
0	0	1	1	0	0	NA	3	dsb1(1A) (n=3)
0	0	1	1	0	0	NA	3	dsb1(1A) (n=3)
0	0	2	1	0	0	NA	3	dsb1(1A) (n=3)
0	0	2	1	0	0	NA	3	dsb1(1A) (n=3)
0	0	2	1	0	0	NA	3	dsb1(1A) (n=3)
0	0	2	1	0	0	NA	3	dsb1(1A) (n=3)
0	0	2	1	0	0	NA	3	dsb1(1A) (n=3)
0	0	2	1	0	0	NA	3	dsb1(1A) (n=3)
0	0	2	1	0	0	NA	3	dsb1(1A) (n=3)
0	0	2	1	0	0	NA	3	dsb1(1A) (n=3)
0	0	2	1	0	0	NA	3	dsb1(1A) (n=3)
0	0	2	1	0	0	NA	3	dsb1(1A) (n=3)
0	0	2	2	0	0	NA	3	dsb1(1A) (n=3)
0	0	2	2	0	0	NA	3	dsb1(1A) (n=3)
0	0	2	2	0	0	NA	3	dsb1(1A) (n=3)
0	0	2	2	0	0	NA	3	dsb1(1A) (n=3)
0	0	2	2	0	1	NA	3	dsb1(1A) (n=3)
0	0	2	2	0	NA	NA	3	dsb1(1A) (n=3)
0	0	3	2	0	NA	NA	3	dsb1(1A) (n=3)
0	0	3	2	0	NA	NA	3	dsb1(1A) (n=3)
0	0	3	2	0	NA	NA	3	dsb1(1A) (n=3)
0	0	3	2	0	NA	NA	3	dsb1(1A) (n=3)
0	0	3	2	1	NA	NA	3	dsb1(1A) (n=3)
0	0	3	2	1	NA	NA	3	dsb1(1A) (n=3)
0	0	3	2	1	NA	NA	3	dsb1(1A) (n=3)
0	0	3	2	1	NA	NA	3	dsb1(1A) (n=3)
0	0	3	3	1	NA	NA	3	dsb1(1A) (n=3)
0	0	3	3	1	NA	NA	3	dsb1(1A) (n=3)
0	0	3	3	1	NA	NA	3	dsb1(1A) (n=3)
0	0	3	3	1	NA	NA	3	dsb1(1A) (n=3)
0	0	3	3	1	NA	NA	3	dsb1(1A) (n=3)
0	0	3	3	1	NA	NA	3	dsb1(1A) (n=3)
0	0	3	3	1	NA	NA	3	dsb1(1A) (n=3)
0	0	3	3	1	NA	NA	3	dsb1(1A) (n=3)
0	0	4	3	1	NA	NA	3	dsb1(1A) (n=3)
0	0	4	3	2	NA	NA	3	dsb1(1A) (n=3)
0	0	4	3	2	NA	NA	3	dsb1(1A) (n=3)
0	0	4	3	2	NA	NA	3	dsb1(1A) (n=3)
0	0	4	3	3	NA	NA	3	dsb1(1A) (n=3)
0	0	4	3	3	NA	NA	3	dsb1(1A) (n=3)
0	0	4	4	NA	NA	NA	3	dsb1(1A) (n=3)
0	0	4	4	NA	NA	NA	3	dsb1(1A) (n=3)
0	0	4	4	NA	NA	NA	3	dsb1(1A) (n=3)
0	0	4	4	NA	NA	NA	3	dsb1(1A) (n=3)
0	0	5	4	NA	NA	NA	3	dsb1(1A) (n=3)
0	0	5	4	NA	NA	NA	3	dsb1(1A) (n=3)
1	0	5	4	NA	NA	NA	3	dsb1(1A) (n=3)
1	0	5	4	NA	NA	NA	3	dsb1(1A) (n=3)
NA	0	5	4	NA	NA	NA	3	dsb1(1A) (n=3)
NA	0	5	5	NA	NA	NA	3	dsb1(1A) (n=3)
NA	1	5	5	NA	NA	NA	3	dsb1(1A) (n=3)
NA	1	5	6	NA	NA	NA	3	dsb1(1A) (n=3)
NA	1	5	8	NA	NA	NA	3	dsb1(1A) (n=3)
NA	1	5	NA	NA	NA	NA	3	dsb1(1A) (n=3)
NA	1	5	NA	NA	NA	NA	3	dsb1(1A) (n=3)
NA	1	5	NA	NA	NA	NA	3	dsb1(1A) (n=3)
NA	1	6	NA	NA	NA	NA	3	dsb1(1A) (n=3)
NA	1	6	NA	NA	NA	NA	3	dsb1(1A) (n=3)
NA	1	6	NA	NA	NA	NA	3	dsb1(1A) (n=3)
NA	1	7	NA	NA	NA	NA	3	dsb1(1A) (n=3)
NA	1	7	NA	NA	NA	NA	3	dsb1(1A) (n=3)
NA	1	7	NA	NA	NA	NA	3	dsb1(1A) (n=3)
NA	NA	7	NA	NA	NA	NA	3	dsb1(1A) (n=3)
NA	NA	8	NA	NA	NA	NA	3	dsb1(1A) (n=3)
NA	NA	9	NA	NA	NA	NA	3	dsb1(1A) (n=3)
NA	NA	9	NA	NA	NA	NA	3	dsb1(1A) (n=3)
NA	NA	12	NA	NA	NA	NA	3	dsb1(1A) (n=3)
Zone 1	Zone 2	Zone 3	Zone 4	Zone 5	Zone 6	Zone 7	Gonad#	Genotype
0	0	0	0	0	0	0	1	pph-4.1;dsb-1(1A) (n=3)
0	0	0	0	0	0	0	1	pph-4.1;dsb-1(1A) (n=3)
0	0	0	0	0	0	0	1	pph-4.1;dsb-1(1A) (n=3)
0	0	0	0	0	0	0	1	pph-4.1;dsb-1(1A) (n=3)
0	0	0	0	0	0	0	1	pph-4.1;dsb-1(1A) (n=3)
0	0	0	0	0	0	0	1	pph-4.1;dsb-1(1A) (n=3)
0	0	0	0	0	0	0	1	pph-4.1;dsb-1(1A) (n=3)
0	0	0	0	0	0	0	1	pph-4.1;dsb-1(1A) (n=3)
0	0	0	0	0	0	0	1	pph-4.1;dsb-1(1A) (n=3)
0	0	0	0	0	0	0	1	pph-4.1;dsb-1(1A) (n=3)
0	0	0	0	0	0	0	1	pph-4.1;dsb-1(1A) (n=3)
0	0	0	0	0	0	NA	1	pph-4.1;dsb-1(1A) (n=3)
0	0	0	0	0	0	NA	1	pph-4.1;dsb-1(1A) (n=3)
0	0	0	0	0	0	NA	1	pph-4.1;dsb-1(1A) (n=3)
0	0	0	0	0	0	NA	1	pph-4.1;dsb-1(1A) (n=3)
0	0	0	0	0	0	NA	1	pph-4.1;dsb-1(1A) (n=3)
0	0	0	0	1	0	NA	1	pph-4.1;dsb-1(1A) (n=3)
0	0	0	0	1	0	NA	1	pph-4.1;dsb-1(1A) (n=3)
0	0	0	0	1	0	NA	1	pph-4.1;dsb-1(1A) (n=3)
0	0	0	0	1	0	NA	1	pph-4.1;dsb-1(1A) (n=3)
0	0	0	0	1	0	NA	1	pph-4.1;dsb-1(1A) (n=3)
0	0	0	0	1	0	NA	1	pph-4.1;dsb-1(1A) (n=3)
0	0	0	0	1	0	NA	1	pph-4.1;dsb-1(1A) (n=3)
0	0	0	0	1	0	NA	1	pph-4.1;dsb-1(1A) (n=3)
0	0	0	0	1	0	NA	1	pph-4.1;dsb-1(1A) (n=3)
0	0	0	0	1	0	NA	1	pph-4.1;dsb-1(1A) (n=3)
0	0	0	0	1	0	NA	1	pph-4.1;dsb-1(1A) (n=3)
0	0	0	0	1	1	NA	1	pph-4.1;dsb-1(1A) (n=3)
0	0	0	0	1	1	NA	1	pph-4.1;dsb-1(1A) (n=3)
0	0	0	0	1	1	NA	1	pph-4.1;dsb-1(1A) (n=3)
0	0	0	0	1	1	NA	1	pph-4.1;dsb-1(1A) (n=3)
0	0	0	0	1	1	NA	1	pph-4.1;dsb-1(1A) (n=3)
0	0	0	0	1	1	NA	1	pph-4.1;dsb-1(1A) (n=3)
0	0	0	0	1	2	NA	1	pph-4.1;dsb-1(1A) (n=3)
0	0	0	0	2	2	NA	1	pph-4.1;dsb-1(1A) (n=3)
0	0	0	0	2	2	NA	1	pph-4.1;dsb-1(1A) (n=3)
0	0	0	0	2	2	NA	1	pph-4.1;dsb-1(1A) (n=3)
0	0	0	0	2	2	NA	1	pph-4.1;dsb-1(1A) (n=3)
0	0	0	0	2	2	NA	1	pph-4.1;dsb-1(1A) (n=3)
0	0	0	0	2	3	NA	1	pph-4.1;dsb-1(1A) (n=3)
0	0	0	0	2	3	NA	1	pph-4.1;dsb-1(1A) (n=3)
0	0	0	0	2	3	NA	1	pph-4.1;dsb-1(1A) (n=3)
0	0	0	0	2	4	NA	1	pph-4.1;dsb-1(1A) (n=3)
0	0	0	0	2	NA	NA	1	pph-4.1;dsb-1(1A) (n=3)
0	0	0	0	2	NA	NA	1	pph-4.1;dsb-1(1A) (n=3)
0	0	0	0	2	NA	NA	1	pph-4.1;dsb-1(1A) (n=3)
0	0	0	0	2	NA	NA	1	pph-4.1;dsb-1(1A) (n=3)
0	0	0	0	3	NA	NA	1	pph-4.1;dsb-1(1A) (n=3)
0	0	0	0	3	NA	NA	1	pph-4.1;dsb-1(1A) (n=3)
0	0	0	0	3	NA	NA	1	pph-4.1;dsb-1(1A) (n=3)
0	0	0	0	3	NA	NA	1	pph-4.1;dsb-1(1A) (n=3)
0	0	0	0	3	NA	NA	1	pph-4.1;dsb-1(1A) (n=3)
0	0	0	0	3	NA	NA	1	pph-4.1;dsb-1(1A) (n=3)
0	0	0	0	3	NA	NA	1	pph-4.1;dsb-1(1A) (n=3)
0	0	0	0	3	NA	NA	1	pph-4.1;dsb-1(1A) (n=3)
0	0	0	0	3	NA	NA	1	pph-4.1;dsb-1(1A) (n=3)
0	0	0	0	3	NA	NA	1	pph-4.1;dsb-1(1A) (n=3)
0	0	0	0	4	NA	NA	1	pph-4.1;dsb-1(1A) (n=3)
0	0	0	1	4	NA	NA	1	pph-4.1;dsb-1(1A) (n=3)
0	0	0	1	4	NA	NA	1	pph-4.1;dsb-1(1A) (n=3)
0	0	0	1	4	NA	NA	1	pph-4.1;dsb-1(1A) (n=3)
0	0	0	1	4	NA	NA	1	pph-4.1;dsb-1(1A) (n=3)
0	0	0	1	5	NA	NA	1	pph-4.1;dsb-1(1A) (n=3)
0	0	0	1	5	NA	NA	1	pph-4.1;dsb-1(1A) (n=3)
0	0	0	1	5	NA	NA	1	pph-4.1;dsb-1(1A) (n=3)
0	0	0	1	6	NA	NA	1	pph-4.1;dsb-1(1A) (n=3)
0	0	0	1	7	NA	NA	1	pph-4.1;dsb-1(1A) (n=3)
0	0	0	1	NA	NA	NA	1	pph-4.1;dsb-1(1A) (n=3)
0	0	0	1	NA	NA	NA	1	pph-4.1;dsb-1(1A) (n=3)
NA	0	0	1	NA	NA	NA	1	pph-4.1;dsb-1(1A) (n=3)
NA	0	0	1	NA	NA	NA	1	pph-4.1;dsb-1(1A) (n=3)
NA	0	0	1	NA	NA	NA	1	pph-4.1;dsb-1(1A) (n=3)
NA	0	0	1	NA	NA	NA	1	pph-4.1;dsb-1(1A) (n=3)
NA	0	0	2	NA	NA	NA	1	pph-4.1;dsb-1(1A) (n=3)
NA	0	0	2	NA	NA	NA	1	pph-4.1;dsb-1(1A) (n=3)
NA	0	0	2	NA	NA	NA	1	pph-4.1;dsb-1(1A) (n=3)
NA	0	0	2	NA	NA	NA	1	pph-4.1;dsb-1(1A) (n=3)
NA	0	0	2	NA	NA	NA	1	pph-4.1;dsb-1(1A) (n=3)
NA	0	0	2	NA	NA	NA	1	pph-4.1;dsb-1(1A) (n=3)
NA	0	0	3	NA	NA	NA	1	pph-4.1;dsb-1(1A) (n=3)
NA	0	0	NA	NA	NA	NA	1	pph-4.1;dsb-1(1A) (n=3)
NA	0	0	NA	NA	NA	NA	1	pph-4.1;dsb-1(1A) (n=3)
NA	2	0	NA	NA	NA	NA	1	pph-4.1;dsb-1(1A) (n=3)
0	0	0	0	0	0	0	2	pph-4.1;dsb-1(1A) (n=3)
0	0	0	0	0	0	0	2	pph-4.1;dsb-1(1A) (n=3)
0	0	0	0	0	0	0	2	pph-4.1;dsb-1(1A) (n=3)
0	0	0	0	0	0	0	2	pph-4.1;dsb-1(1A) (n=3)
0	0	0	0	0	0	0	2	pph-4.1;dsb-1(1A) (n=3)
0	0	0	0	0	0	0	2	pph-4.1;dsb-1(1A) (n=3)
0	0	0	0	0	0	0	2	pph-4.1;dsb-1(1A) (n=3)
0	0	0	0	0	0	0	2	pph-4.1;dsb-1(1A) (n=3)
0	0	0	0	0	0	0	2	pph-4.1;dsb-1(1A) (n=3)
0	0	0	0	0	0	0	2	pph-4.1;dsb-1(1A) (n=3)
0	0	0	0	0	0	0	2	pph-4.1;dsb-1(1A) (n=3)
0	0	0	0	0	0	0	2	pph-4.1;dsb-1(1A) (n=3)
0	0	0	0	0	0	0	2	pph-4.1;dsb-1(1A) (n=3)
0	0	0	0	0	0	1	2	pph-4.1;dsb-1(1A) (n=3)
0	0	0	0	0	0	NA	2	pph-4.1;dsb-1(1A) (n=3)
0	0	0	0	0	0	NA	2	pph-4.1;dsb-1(1A) (n=3)
0	0	0	0	0	0	NA	2	pph-4.1;dsb-1(1A) (n=3)
0	0	0	0	0	0	NA	2	pph-4.1;dsb-1(1A) (n=3)
0	0	0	0	1	0	NA	2	pph-4.1;dsb-1(1A) (n=3)
0	0	0	0	1	1	NA	2	pph-4.1;dsb-1(1A) (n=3)
0	0	0	0	1	1	NA	2	pph-4.1;dsb-1(1A) (n=3)
0	0	0	0	1	2	NA	2	pph-4.1;dsb-1(1A) (n=3)
0	0	0	0	1	2	NA	2	pph-4.1;dsb-1(1A) (n=3)
0	0	0	0	1	2	NA	2	pph-4.1;dsb-1(1A) (n=3)
0	0	0	0	1	2	NA	2	pph-4.1;dsb-1(1A) (n=3)
0	0	0	0	1	2	NA	2	pph-4.1;dsb-1(1A) (n=3)
0	0	0	0	1	2	NA	2	pph-4.1;dsb-1(1A) (n=3)
0	0	0	0	1	2	NA	2	pph-4.1;dsb-1(1A) (n=3)
0	0	0	0	1	2	NA	2	pph-4.1;dsb-1(1A) (n=3)
0	0	0	0	1	2	NA	2	pph-4.1;dsb-1(1A) (n=3)
0	0	0	0	1	2	NA	2	pph-4.1;dsb-1(1A) (n=3)
0	0	0	0	1	2	NA	2	pph-4.1;dsb-1(1A) (n=3)
0	0	0	0	1	3	NA	2	pph-4.1;dsb-1(1A) (n=3)
0	0	0	0	1	3	NA	2	pph-4.1;dsb-1(1A) (n=3)
0	0	0	0	1	3	NA	2	pph-4.1;dsb-1(1A) (n=3)
0	0	0	0	2	3	NA	2	pph-4.1;dsb-1(1A) (n=3)
0	0	0	0	2	4	NA	2	pph-4.1;dsb-1(1A) (n=3)
0	0	1	0	2	4	NA	2	pph-4.1;dsb-1(1A) (n=3)
0	0	1	0	2	5	NA	2	pph-4.1;dsb-1(1A) (n=3)
0	1	NA	0	2	6	NA	2	pph-4.1;dsb-1(1A) (n=3)
0	1	NA	0	2	6	NA	2	pph-4.1;dsb-1(1A) (n=3)
0	1	NA	0	2	6	NA	2	pph-4.1;dsb-1(1A) (n=3)
NA	1	NA	0	2	6	NA	2	pph-4.1;dsb-1(1A) (n=3)
NA	NA	NA	0	2	6	NA	2	pph-4.1;dsb-1(1A) (n=3)
NA	NA	NA	0	2	NA	NA	2	pph-4.1;dsb-1(1A) (n=3)
NA	NA	NA	0	2	NA	NA	2	pph-4.1;dsb-1(1A) (n=3)
NA	NA	NA	0	2	NA	NA	2	pph-4.1;dsb-1(1A) (n=3)
NA	NA	NA	0	3	NA	NA	2	pph-4.1;dsb-1(1A) (n=3)
NA	NA	NA	0	3	NA	NA	2	pph-4.1;dsb-1(1A) (n=3)
NA	NA	NA	0	3	NA	NA	2	pph-4.1;dsb-1(1A) (n=3)
NA	NA	NA	0	3	NA	NA	2	pph-4.1;dsb-1(1A) (n=3)
NA	NA	NA	0	4	NA	NA	2	pph-4.1;dsb-1(1A) (n=3)
NA	NA	NA	0	4	NA	NA	2	pph-4.1;dsb-1(1A) (n=3)
NA	NA	NA	0	4	NA	NA	2	pph-4.1;dsb-1(1A) (n=3)
NA	NA	NA	1	4	NA	NA	2	pph-4.1;dsb-1(1A) (n=3)
NA	NA	NA	1	4	NA	NA	2	pph-4.1;dsb-1(1A) (n=3)
NA	NA	NA	1	4	NA	NA	2	pph-4.1;dsb-1(1A) (n=3)
NA	NA	NA	1	4	NA	NA	2	pph-4.1;dsb-1(1A) (n=3)
NA	NA	NA	1	4	NA	NA	2	pph-4.1;dsb-1(1A) (n=3)
NA	NA	NA	1	4	NA	NA	2	pph-4.1;dsb-1(1A) (n=3)
NA	NA	NA	1	4	NA	NA	2	pph-4.1;dsb-1(1A) (n=3)
NA	NA	NA	2	5	NA	NA	2	pph-4.1;dsb-1(1A) (n=3)
NA	NA	NA	2	5	NA	NA	2	pph-4.1;dsb-1(1A) (n=3)
NA	NA	NA	2	5	NA	NA	2	pph-4.1;dsb-1(1A) (n=3)
NA	NA	NA	3	7	NA	NA	2	pph-4.1;dsb-1(1A) (n=3)
NA	NA	NA	NA	7	NA	NA	2	pph-4.1;dsb-1(1A) (n=3)
0	0	0	0	0	0	0	3	pph-4.1;dsb-1(1A) (n=3)
0	0	0	0	0	0	0	3	pph-4.1;dsb-1(1A) (n=3)
0	0	0	0	0	0	0	3	pph-4.1;dsb-1(1A) (n=3)
0	0	0	0	0	0	0	3	pph-4.1;dsb-1(1A) (n=3)
0	0	0	0	0	0	0	3	pph-4.1;dsb-1(1A) (n=3)
0	0	0	0	0	0	0	3	pph-4.1;dsb-1(1A) (n=3)
0	0	0	0	0	0	0	3	pph-4.1;dsb-1(1A) (n=3)
0	0	0	0	0	0	0	3	pph-4.1;dsb-1(1A) (n=3)
0	0	0	0	0	0	0	3	pph-4.1;dsb-1(1A) (n=3)
0	0	0	0	0	0	NA	3	pph-4.1;dsb-1(1A) (n=3)
0	0	0	0	0	0	NA	3	pph-4.1;dsb-1(1A) (n=3)
0	0	0	0	0	0	NA	3	pph-4.1;dsb-1(1A) (n=3)
0	0	0	0	0	0	NA	3	pph-4.1;dsb-1(1A) (n=3)
0	0	0	0	0	0	NA	3	pph-4.1;dsb-1(1A) (n=3)
0	0	0	0	0	0	NA	3	pph-4.1;dsb-1(1A) (n=3)
0	0	0	0	1	0	NA	3	pph-4.1;dsb-1(1A) (n=3)
0	0	0	0	1	0	NA	3	pph-4.1;dsb-1(1A) (n=3)
0	0	0	0	1	0	NA	3	pph-4.1;dsb-1(1A) (n=3)
0	0	0	0	1	0	NA	3	pph-4.1;dsb-1(1A) (n=3)
0	0	0	0	1	1	NA	3	pph-4.1;dsb-1(1A) (n=3)
0	0	0	0	1	1	NA	3	pph-4.1;dsb-1(1A) (n=3)
0	0	0	0	1	1	NA	3	pph-4.1;dsb-1(1A) (n=3)
0	0	0	0	1	1	NA	3	pph-4.1;dsb-1(1A) (n=3)
0	0	0	0	1	1	NA	3	pph-4.1;dsb-1(1A) (n=3)
0	0	0	0	1	1	NA	3	pph-4.1;dsb-1(1A) (n=3)
0	0	0	0	1	1	NA	3	pph-4.1;dsb-1(1A) (n=3)
0	0	0	0	1	1	NA	3	pph-4.1;dsb-1(1A) (n=3)
0	0	0	0	2	1	NA	3	pph-4.1;dsb-1(1A) (n=3)
0	0	0	0	2	1	NA	3	pph-4.1;dsb-1(1A) (n=3)
0	0	0	0	2	2	NA	3	pph-4.1;dsb-1(1A) (n=3)
0	0	0	0	2	2	NA	3	pph-4.1;dsb-1(1A) (n=3)
0	0	0	0	2	2	NA	3	pph-4.1;dsb-1(1A) (n=3)
0	0	0	0	2	2	NA	3	pph-4.1;dsb-1(1A) (n=3)
0	0	0	0	2	2	NA	3	pph-4.1;dsb-1(1A) (n=3)
0	0	0	0	2	2	NA	3	pph-4.1;dsb-1(1A) (n=3)
0	0	0	0	2	3	NA	3	pph-4.1;dsb-1(1A) (n=3)
0	0	0	0	2	3	NA	3	pph-4.1;dsb-1(1A) (n=3)
0	0	0	0	2	3	NA	3	pph-4.1;dsb-1(1A) (n=3)
0	0	0	0	2	3	NA	3	pph-4.1;dsb-1(1A) (n=3)
0	0	0	0	2	4	NA	3	pph-4.1;dsb-1(1A) (n=3)
0	0	0	0	2	4	NA	3	pph-4.1;dsb-1(1A) (n=3)
0	0	0	0	2	5	NA	3	pph-4.1;dsb-1(1A) (n=3)
0	0	0	0	2	6	NA	3	pph-4.1;dsb-1(1A) (n=3)
0	0	0	0	2	NA	NA	3	pph-4.1;dsb-1(1A) (n=3)
0	0	0	0	2	NA	NA	3	pph-4.1;dsb-1(1A) (n=3)
0	0	0	0	3	NA	NA	3	pph-4.1;dsb-1(1A) (n=3)
0	0	0	0	3	NA	NA	3	pph-4.1;dsb-1(1A) (n=3)
0	0	0	0	3	NA	NA	3	pph-4.1;dsb-1(1A) (n=3)
0	0	0	0	3	NA	NA	3	pph-4.1;dsb-1(1A) (n=3)
0	0	0	0	3	NA	NA	3	pph-4.1;dsb-1(1A) (n=3)
0	0	0	0	3	NA	NA	3	pph-4.1;dsb-1(1A) (n=3)
0	NA	0	0	3	NA	NA	3	pph-4.1;dsb-1(1A) (n=3)
0	NA	0	0	3	NA	NA	3	pph-4.1;dsb-1(1A) (n=3)
0	NA	0	0	4	NA	NA	3	pph-4.1;dsb-1(1A) (n=3)
0	NA	0	0	4	NA	NA	3	pph-4.1;dsb-1(1A) (n=3)
NA	NA	0	0	4	NA	NA	3	pph-4.1;dsb-1(1A) (n=3)
NA	NA	0	0	4	NA	NA	3	pph-4.1;dsb-1(1A) (n=3)
NA	NA	0	0	4	NA	NA	3	pph-4.1;dsb-1(1A) (n=3)
NA	NA	0	0	4	NA	NA	3	pph-4.1;dsb-1(1A) (n=3)
NA	NA	0	0	4	NA	NA	3	pph-4.1;dsb-1(1A) (n=3)
NA	NA	0	0	4	NA	NA	3	pph-4.1;dsb-1(1A) (n=3)
NA	NA	0	0	5	NA	NA	3	pph-4.1;dsb-1(1A) (n=3)
NA	NA	0	0	5	NA	NA	3	pph-4.1;dsb-1(1A) (n=3)
NA	NA	0	0	5	NA	NA	3	pph-4.1;dsb-1(1A) (n=3)
NA	NA	0	0	5	NA	NA	3	pph-4.1;dsb-1(1A) (n=3)
NA	NA	0	0	5	NA	NA	3	pph-4.1;dsb-1(1A) (n=3)
NA	NA	0	0	5	NA	NA	3	pph-4.1;dsb-1(1A) (n=3)
NA	NA	0	1	5	NA	NA	3	pph-4.1;dsb-1(1A) (n=3)
NA	NA	0	1	5	NA	NA	3	pph-4.1;dsb-1(1A) (n=3)
NA	NA	0	1	5	NA	NA	3	pph-4.1;dsb-1(1A) (n=3)
NA	NA	0	1	7	NA	NA	3	pph-4.1;dsb-1(1A) (n=3)
NA	NA	0	1	9	NA	NA	3	pph-4.1;dsb-1(1A) (n=3)
NA	NA	0	1	NA	NA	NA	3	pph-4.1;dsb-1(1A) (n=3)
NA	NA	0	1	NA	NA	NA	3	pph-4.1;dsb-1(1A) (n=3)
NA	NA	1	1	NA	NA	NA	3	pph-4.1;dsb-1(1A) (n=3)
NA	NA	1	1	NA	NA	NA	3	pph-4.1;dsb-1(1A) (n=3)
NA	NA	1	1	NA	NA	NA	3	pph-4.1;dsb-1(1A) (n=3)
NA	NA	NA	1	NA	NA	NA	3	pph-4.1;dsb-1(1A) (n=3)
NA	NA	NA	1	NA	NA	NA	3	pph-4.1;dsb-1(1A) (n=3)
NA	NA	NA	2	NA	NA	NA	3	pph-4.1;dsb-1(1A) (n=3)
NA	NA	NA	2	NA	NA	NA	3	pph-4.1;dsb-1(1A) (n=3)
NA	NA	NA	2	NA	NA	NA	3	pph-4.1;dsb-1(1A) (n=3)
NA	NA	NA	2	NA	NA	NA	3	pph-4.1;dsb-1(1A) (n=3)
NA	NA	NA	2	NA	NA	NA	3	pph-4.1;dsb-1(1A) (n=3)
NA	NA	NA	2	NA	NA	NA	3	pph-4.1;dsb-1(1A) (n=3)
NA	NA	NA	3	NA	NA	NA	3	pph-4.1;dsb-1(1A) (n=3)
NA	NA	NA	4	NA	NA	NA	3	pph-4.1;dsb-1(1A) (n=3)
NA	NA	NA	4	NA	NA	NA	3	pph-4.1;dsb-1(1A) (n=3)
Zone 1	Zone 2	Zone 3	Zone 4	Zone 5	Zone 6	Zone 7	Gonad#	Genotype
0	0	0	0	0	0	0	1	dsb-2;dsb-1(1A) (n=3)
0	0	0	0	0	0	0	1	dsb-2;dsb-1(1A) (n=3)
0	0	0	0	0	0	0	1	dsb-2;dsb-1(1A) (n=3)
0	0	0	0	0	0	0	1	dsb-2;dsb-1(1A) (n=3)
0	0	0	0	0	0	0	1	dsb-2;dsb-1(1A) (n=3)
0	0	0	0	0	0	NA	1	dsb-2;dsb-1(1A) (n=3)
0	0	0	0	0	0	NA	1	dsb-2;dsb-1(1A) (n=3)
0	0	0	0	0	0	NA	1	dsb-2;dsb-1(1A) (n=3)
0	0	0	0	0	0	NA	1	dsb-2;dsb-1(1A) (n=3)
0	0	0	0	0	0	NA	1	dsb-2;dsb-1(1A) (n=3)
0	0	0	0	0	0	NA	1	dsb-2;dsb-1(1A) (n=3)
0	0	0	0	0	0	NA	1	dsb-2;dsb-1(1A) (n=3)
0	0	0	0	0	0	NA	1	dsb-2;dsb-1(1A) (n=3)
0	0	0	0	0	0	NA	1	dsb-2;dsb-1(1A) (n=3)
0	0	0	0	0	0	NA	1	dsb-2;dsb-1(1A) (n=3)
0	0	0	0	0	0	NA	1	dsb-2;dsb-1(1A) (n=3)
0	0	0	0	0	0	NA	1	dsb-2;dsb-1(1A) (n=3)
0	0	0	0	0	0	NA	1	dsb-2;dsb-1(1A) (n=3)
0	0	1	0	0	1	NA	1	dsb-2;dsb-1(1A) (n=3)
0	0	1	0	0	1	NA	1	dsb-2;dsb-1(1A) (n=3)
0	0	1	0	0	1	NA	1	dsb-2;dsb-1(1A) (n=3)
0	0	1	0	0	1	NA	1	dsb-2;dsb-1(1A) (n=3)
0	0	1	0	0	1	NA	1	dsb-2;dsb-1(1A) (n=3)
0	0	1	0	0	2	NA	1	dsb-2;dsb-1(1A) (n=3)
0	0	1	0	0	2	NA	1	dsb-2;dsb-1(1A) (n=3)
0	0	1	0	1	3	NA	1	dsb-2;dsb-1(1A) (n=3)
0	0	1	0	1	NA	NA	1	dsb-2;dsb-1(1A) (n=3)
0	0	1	0	1	NA	NA	1	dsb-2;dsb-1(1A) (n=3)
0	0	1	0	1	NA	NA	1	dsb-2;dsb-1(1A) (n=3)
0	0	1	0	1	NA	NA	1	dsb-2;dsb-1(1A) (n=3)
0	0	1	0	1	NA	NA	1	dsb-2;dsb-1(1A) (n=3)
0	0	1	0	1	NA	NA	1	dsb-2;dsb-1(1A) (n=3)
0	0	1	0	1	NA	NA	1	dsb-2;dsb-1(1A) (n=3)
0	0	2	0	1	NA	NA	1	dsb-2;dsb-1(1A) (n=3)
0	0	2	1	1	NA	NA	1	dsb-2;dsb-1(1A) (n=3)
0	0	2	1	1	NA	NA	1	dsb-2;dsb-1(1A) (n=3)
0	0	2	1	1	NA	NA	1	dsb-2;dsb-1(1A) (n=3)
0	0	2	1	1	NA	NA	1	dsb-2;dsb-1(1A) (n=3)
0	0	2	1	1	NA	NA	1	dsb-2;dsb-1(1A) (n=3)
0	0	2	1	2	NA	NA	1	dsb-2;dsb-1(1A) (n=3)
0	0	2	1	2	NA	NA	1	dsb-2;dsb-1(1A) (n=3)
0	0	2	1	3	NA	NA	1	dsb-2;dsb-1(1A) (n=3)
0	0	2	1	NA	NA	NA	1	dsb-2;dsb-1(1A) (n=3)
0	0	2	1	NA	NA	NA	1	dsb-2;dsb-1(1A) (n=3)
0	0	3	1	NA	NA	NA	1	dsb-2;dsb-1(1A) (n=3)
0	0	3	1	NA	NA	NA	1	dsb-2;dsb-1(1A) (n=3)
0	0	3	1	NA	NA	NA	1	dsb-2;dsb-1(1A) (n=3)
0	0	3	1	NA	NA	NA	1	dsb-2;dsb-1(1A) (n=3)
0	0	3	1	NA	NA	NA	1	dsb-2;dsb-1(1A) (n=3)
0	0	3	1	NA	NA	NA	1	dsb-2;dsb-1(1A) (n=3)
0	0	3	1	NA	NA	NA	1	dsb-2;dsb-1(1A) (n=3)
0	0	3	1	NA	NA	NA	1	dsb-2;dsb-1(1A) (n=3)
0	0	3	1	NA	NA	NA	1	dsb-2;dsb-1(1A) (n=3)
0	0	3	1	NA	NA	NA	1	dsb-2;dsb-1(1A) (n=3)
0	0	3	1	NA	NA	NA	1	dsb-2;dsb-1(1A) (n=3)
0	0	3	1	NA	NA	NA	1	dsb-2;dsb-1(1A) (n=3)
0	0	3	1	NA	NA	NA	1	dsb-2;dsb-1(1A) (n=3)
0	0	3	1	NA	NA	NA	1	dsb-2;dsb-1(1A) (n=3)
0	0	4	2	NA	NA	NA	1	dsb-2;dsb-1(1A) (n=3)
1	0	4	2	NA	NA	NA	1	dsb-2;dsb-1(1A) (n=3)
1	0	4	2	NA	NA	NA	1	dsb-2;dsb-1(1A) (n=3)
1	0	4	2	NA	NA	NA	1	dsb-2;dsb-1(1A) (n=3)
1	0	NA	2	NA	NA	NA	1	dsb-2;dsb-1(1A) (n=3)
1	0	NA	2	NA	NA	NA	1	dsb-2;dsb-1(1A) (n=3)
NA	0	NA	2	NA	NA	NA	1	dsb-2;dsb-1(1A) (n=3)
NA	0	NA	2	NA	NA	NA	1	dsb-2;dsb-1(1A) (n=3)
NA	0	NA	3	NA	NA	NA	1	dsb-2;dsb-1(1A) (n=3)
NA	1	NA	3	NA	NA	NA	1	dsb-2;dsb-1(1A) (n=3)
NA	1	NA	3	NA	NA	NA	1	dsb-2;dsb-1(1A) (n=3)
NA	1	NA	3	NA	NA	NA	1	dsb-2;dsb-1(1A) (n=3)
NA	1	NA	NA	NA	NA	NA	1	dsb-2;dsb-1(1A) (n=3)
NA	1	NA	NA	NA	NA	NA	1	dsb-2;dsb-1(1A) (n=3)
0	0	0	0	0	0	0	2	dsb-2;dsb-1(1A) (n=3)
0	0	0	0	0	0	0	2	dsb-2;dsb-1(1A) (n=3)
0	0	0	0	0	0	0	2	dsb-2;dsb-1(1A) (n=3)
0	0	0	0	0	0	0	2	dsb-2;dsb-1(1A) (n=3)
0	0	0	0	0	0	0	2	dsb-2;dsb-1(1A) (n=3)
0	0	0	0	0	0	0	2	dsb-2;dsb-1(1A) (n=3)
0	0	0	0	0	0	0	2	dsb-2;dsb-1(1A) (n=3)
0	0	0	0	0	0	0	2	dsb-2;dsb-1(1A) (n=3)
0	0	0	0	0	0	0	2	dsb-2;dsb-1(1A) (n=3)
0	0	0	0	0	0	0	2	dsb-2;dsb-1(1A) (n=3)
0	0	0	0	0	0	0	2	dsb-2;dsb-1(1A) (n=3)
0	0	0	0	0	0	NA	2	dsb-2;dsb-1(1A) (n=3)
0	0	0	0	0	0	NA	2	dsb-2;dsb-1(1A) (n=3)
0	0	0	0	0	0	NA	2	dsb-2;dsb-1(1A) (n=3)
0	0	0	0	0	0	NA	2	dsb-2;dsb-1(1A) (n=3)
0	0	0	0	0	0	NA	2	dsb-2;dsb-1(1A) (n=3)
0	0	0	0	0	0	NA	2	dsb-2;dsb-1(1A) (n=3)
0	0	0	0	0	0	NA	2	dsb-2;dsb-1(1A) (n=3)
0	0	0	0	0	0	NA	2	dsb-2;dsb-1(1A) (n=3)
0	0	0	0	0	0	NA	2	dsb-2;dsb-1(1A) (n=3)
0	0	0	0	0	0	NA	2	dsb-2;dsb-1(1A) (n=3)
0	0	0	0	0	0	NA	2	dsb-2;dsb-1(1A) (n=3)
0	0	0	0	0	0	NA	2	dsb-2;dsb-1(1A) (n=3)
0	0	0	0	0	0	NA	2	dsb-2;dsb-1(1A) (n=3)
0	0	0	0	0	0	NA	2	dsb-2;dsb-1(1A) (n=3)
0	0	0	0	0	0	NA	2	dsb-2;dsb-1(1A) (n=3)
0	0	0	0	0	0	NA	2	dsb-2;dsb-1(1A) (n=3)
0	0	0	0	0	0	NA	2	dsb-2;dsb-1(1A) (n=3)
0	0	0	0	0	0	NA	2	dsb-2;dsb-1(1A) (n=3)
0	0	1	0	0	0	NA	2	dsb-2;dsb-1(1A) (n=3)
0	0	1	0	0	0	NA	2	dsb-2;dsb-1(1A) (n=3)
0	0	1	0	0	1	NA	2	dsb-2;dsb-1(1A) (n=3)
0	0	1	0	0	1	NA	2	dsb-2;dsb-1(1A) (n=3)
0	0	1	0	0	1	NA	2	dsb-2;dsb-1(1A) (n=3)
0	0	1	0	0	1	NA	2	dsb-2;dsb-1(1A) (n=3)
0	0	1	0	0	NA	NA	2	dsb-2;dsb-1(1A) (n=3)
0	0	1	0	1	NA	NA	2	dsb-2;dsb-1(1A) (n=3)
0	0	1	1	1	NA	NA	2	dsb-2;dsb-1(1A) (n=3)
0	0	1	1	1	NA	NA	2	dsb-2;dsb-1(1A) (n=3)
0	0	1	1	1	NA	NA	2	dsb-2;dsb-1(1A) (n=3)
0	0	1	1	1	NA	NA	2	dsb-2;dsb-1(1A) (n=3)
0	0	1	1	1	NA	NA	2	dsb-2;dsb-1(1A) (n=3)
0	0	1	1	2	NA	NA	2	dsb-2;dsb-1(1A) (n=3)
0	0	1	1	2	NA	NA	2	dsb-2;dsb-1(1A) (n=3)
0	0	1	1	2	NA	NA	2	dsb-2;dsb-1(1A) (n=3)
0	0	1	1	2	NA	NA	2	dsb-2;dsb-1(1A) (n=3)
0	0	1	1	2	NA	NA	2	dsb-2;dsb-1(1A) (n=3)
0	0	1	1	3	NA	NA	2	dsb-2;dsb-1(1A) (n=3)
1	0	1	2	3	NA	NA	2	dsb-2;dsb-1(1A) (n=3)
1	0	1	2	3	NA	NA	2	dsb-2;dsb-1(1A) (n=3)
1	0	1	2	3	NA	NA	2	dsb-2;dsb-1(1A) (n=3)
1	0	2	2	NA	NA	NA	2	dsb-2;dsb-1(1A) (n=3)
1	0	2	2	NA	NA	NA	2	dsb-2;dsb-1(1A) (n=3)
NA	0	2	2	NA	NA	NA	2	dsb-2;dsb-1(1A) (n=3)
NA	0	2	2	NA	NA	NA	2	dsb-2;dsb-1(1A) (n=3)
NA	0	2	3	NA	NA	NA	2	dsb-2;dsb-1(1A) (n=3)
NA	0	2	3	NA	NA	NA	2	dsb-2;dsb-1(1A) (n=3)
NA	1	2	3	NA	NA	NA	2	dsb-2;dsb-1(1A) (n=3)
NA	NA	3	3	NA	NA	NA	2	dsb-2;dsb-1(1A) (n=3)
NA	NA	3	4	NA	NA	NA	2	dsb-2;dsb-1(1A) (n=3)
0	0	0	0	0	0	0	3	dsb-2;dsb-1(1A) (n=3)
0	0	0	0	0	0	0	3	dsb-2;dsb-1(1A) (n=3)
0	0	0	0	0	0	0	3	dsb-2;dsb-1(1A) (n=3)
0	0	0	0	0	0	0	3	dsb-2;dsb-1(1A) (n=3)
0	0	0	0	0	0	0	3	dsb-2;dsb-1(1A) (n=3)
0	0	0	0	0	0	0	3	dsb-2;dsb-1(1A) (n=3)
0	0	0	0	0	0	0	3	dsb-2;dsb-1(1A) (n=3)
0	0	0	0	0	0	0	3	dsb-2;dsb-1(1A) (n=3)
0	0	0	0	0	0	0	3	dsb-2;dsb-1(1A) (n=3)
0	0	0	0	0	0	0	3	dsb-2;dsb-1(1A) (n=3)
0	0	0	0	0	0	0	3	dsb-2;dsb-1(1A) (n=3)
0	0	0	0	0	0	NA	3	dsb-2;dsb-1(1A) (n=3)
0	0	0	0	0	0	NA	3	dsb-2;dsb-1(1A) (n=3)
0	0	0	0	0	0	NA	3	dsb-2;dsb-1(1A) (n=3)
0	0	0	0	0	0	NA	3	dsb-2;dsb-1(1A) (n=3)
0	0	0	0	0	0	NA	3	dsb-2;dsb-1(1A) (n=3)
0	0	0	0	0	0	NA	3	dsb-2;dsb-1(1A) (n=3)
0	0	0	0	0	0	NA	3	dsb-2;dsb-1(1A) (n=3)
0	0	0	1	0	0	NA	3	dsb-2;dsb-1(1A) (n=3)
0	0	0	1	0	0	NA	3	dsb-2;dsb-1(1A) (n=3)
0	0	0	1	0	0	NA	3	dsb-2;dsb-1(1A) (n=3)
0	0	0	1	0	0	NA	3	dsb-2;dsb-1(1A) (n=3)
0	0	0	1	0	0	NA	3	dsb-2;dsb-1(1A) (n=3)
0	0	0	1	0	0	NA	3	dsb-2;dsb-1(1A) (n=3)
0	0	0	1	0	1	NA	3	dsb-2;dsb-1(1A) (n=3)
0	0	0	1	0	1	NA	3	dsb-2;dsb-1(1A) (n=3)
0	0	0	1	0	1	NA	3	dsb-2;dsb-1(1A) (n=3)
0	0	0	1	0	2	NA	3	dsb-2;dsb-1(1A) (n=3)
0	0	0	1	0	NA	NA	3	dsb-2;dsb-1(1A) (n=3)
0	0	0	1	0	NA	NA	3	dsb-2;dsb-1(1A) (n=3)
0	0	0	1	0	NA	NA	3	dsb-2;dsb-1(1A) (n=3)
0	0	0	1	0	NA	NA	3	dsb-2;dsb-1(1A) (n=3)
0	0	0	1	0	NA	NA	3	dsb-2;dsb-1(1A) (n=3)
0	0	0	1	0	NA	NA	3	dsb-2;dsb-1(1A) (n=3)
0	0	1	1	0	NA	NA	3	dsb-2;dsb-1(1A) (n=3)
0	0	1	1	0	NA	NA	3	dsb-2;dsb-1(1A) (n=3)
0	0	1	1	1	NA	NA	3	dsb-2;dsb-1(1A) (n=3)
0	0	1	1	1	NA	NA	3	dsb-2;dsb-1(1A) (n=3)
0	0	1	1	1	NA	NA	3	dsb-2;dsb-1(1A) (n=3)
0	0	1	1	1	NA	NA	3	dsb-2;dsb-1(1A) (n=3)
0	0	1	1	1	NA	NA	3	dsb-2;dsb-1(1A) (n=3)
0	0	1	2	1	NA	NA	3	dsb-2;dsb-1(1A) (n=3)
0	0	1	2	1	NA	NA	3	dsb-2;dsb-1(1A) (n=3)
0	0	1	2	1	NA	NA	3	dsb-2;dsb-1(1A) (n=3)
0	0	1	2	1	NA	NA	3	dsb-2;dsb-1(1A) (n=3)
0	0	1	2	1	NA	NA	3	dsb-2;dsb-1(1A) (n=3)
0	0	1	2	1	NA	NA	3	dsb-2;dsb-1(1A) (n=3)
0	0	1	2	1	NA	NA	3	dsb-2;dsb-1(1A) (n=3)
0	0	1	2	2	NA	NA	3	dsb-2;dsb-1(1A) (n=3)
0	0	1	2	2	NA	NA	3	dsb-2;dsb-1(1A) (n=3)
0	0	1	2	2	NA	NA	3	dsb-2;dsb-1(1A) (n=3)
0	0	2	3	2	NA	NA	3	dsb-2;dsb-1(1A) (n=3)
0	0	2	3	NA	NA	NA	3	dsb-2;dsb-1(1A) (n=3)
0	0	2	3	NA	NA	NA	3	dsb-2;dsb-1(1A) (n=3)
0	0	2	3	NA	NA	NA	3	dsb-2;dsb-1(1A) (n=3)
0	0	2	5	NA	NA	NA	3	dsb-2;dsb-1(1A) (n=3)
0	0	3	5	NA	NA	NA	3	dsb-2;dsb-1(1A) (n=3)
NA	1	3	NA	NA	NA	NA	3	dsb-2;dsb-1(1A) (n=3)
NA	1	4	NA	NA	NA	NA	3	dsb-2;dsb-1(1A) (n=3)
