# Supplementary material for: Phosphoregulation of DSB-1 mediates control of meiotic double-strand break activity
Source: eLife journal article supplement (doi:10.7554/elife.77956), 2022-06-27
Supplement: supp [file elife-77956-supp-v1.zip › elife_poa_e77956_Figure_5_source_data_1.xlsx]

## Sheet: Figure 5B
Figure 5B Embryonic viability of each genotype in each egg-laying day
Strain ID_plate#	#of Dead eggs on P1	# of Males on P1	# of HMP on P1	#of Dead eggs on P2	# of Males on P2	# of HMP on P2	#of Dead eggs on P3	# of Males on P3	# of HMP on P3	#of Dead eggs on P4	# of Males on P4	# of HMP on P4	#of Dead eggs on P5	# of Males on P5	# of HMP on P5
N2	0	0	42	0	0	77	2	0	91	1	0	62	0	0	22
N2	0	0	47	1	0	82	0	0	52	0	0	37	0	0	29
N2	0	0	45	1	0	80	0	0	85	0	0	14	0	0	6
N2	0	0	52	0	0	139	1	0	149	1	0	23	1	1	8
N2	0	0	48	0	0	146	1	0	130	1	0	6	1	0	0
N2	0	0	42	2	0	153	2	0	121	1	0	5	0	0	1
N2	0	0	52	2	0	211	1	0	102	0	0	2	0	0	0
N2	0	0	71	0	0	181	2	0	65	0	0	0	0	0	0
N2	0	0	61	4	0	141	0	0	76	0	0	6	0	0	1
N2	0	0	47	0	0	191	0	0	62	0	0	3	0	0	0
N2	0	0	41	0	0	194	0	0	95	0	0	0	0	0	0
N2	0	0	32	0	0	191	2	0	80	0	1	1	0	0	0
N2	0	0	50	0	0	188	1	0	157	0	0	11	0	0	0
N2	0	0	26	0	0	163	0	0	86	0	0	8	0	0	0
N2	0	0	35	0	0	191	0	1	111	0	0	0	0	0	0
N2	0	0	42	0	0	150	0	0	72	1	0	1	0	0	1
pph-4.1(tm1598)	12	0	0	23	1	0	5	0	0	0	0	0	0	0	0
pph-4.1(tm1598)	23	1	0	46	2	2	30	0	1	15	0	1	12	0	0
pph-4.1(tm1598)	29	0	0	50	1	1	32	0	0	13	0	0	6	0	0
pph-4.1(tm1598)	22	0	0	49	2	1	14	0	0	10	0	0	4	0	0
pph-4.1(tm1598)	24	0	0	54	0	2	35	0	0	6	0	0	2	0	0
pph-4.1(tm1598)	10	0	0	27	0	1	21	0	0	5	0	0	5	0	0
pph-4.1(tm1598)	24	1	0	49	0	0	19	0	0	5	0	1	1	0	0
pph-4.1(tm1598)	7	1	0	57	0	1	15	0	0	13	0	0	2	0	0
pph-4.1(tm1598)	20	0	0	55	1	1	42	0	1	18	0	0	9	0	0
pph-4.1(tm1598)	22	0	0	61	0	1	24	0	0	9	0	0	3	0	0
pph-4.1(tm1598)	25	0	0	64	0	0	6	0	0	3	0	0	2	0	0
pph-4.1(tm1598)	15	1	0	39	0	0	9	0	0	10	0	1	9	0	0
pph-4.1(tm1598)	19	0	1	51	0	0	15	1	0	3	0	0	0	0	0
pph-4.1(tm1598)	28	1	0	48	0	0	10	0	0	0	0	0	0	0	0
dsb-2(me96)	1	3	23	64	7	44	75	4	5	9	1	0	0	0	0
dsb-2(me96)	0	0	17	63	7	33	101	7	7	6	2	0	0	0	0
dsb-2(me96)	1	2	12	17	3	30	23	0	11	11	2	8	8	2	3
dsb-2(me96)	3	0	12	76	8	46	86	1	8	5	0	1	1	0	0
dsb-2(me96)	7	1	12	59	13	33	46	3	3	5	0	0	0	0	0
dsb-2(me96)	4	2	11	65	9	45	61	5	6	4	0	0	2	0	0
dsb-2(me96)	0	0	16	59	10	48	52	5	13	7	0	0	0	0	0
dsb-2(me96)	5	1	18	71	9	33	58	3	2	4	0	0	0	0	0
dsb-2(me96)	21	0	9	111	3	15	43	0	1	3	0	1	0	0	0
dsb-2(me96)	2	2	20	45	6	23	19	1	11	20	2	5	6	1	0
dsb-2(me96)	0	0	19	28	3	16	16	1	2	0	0	0	0	0	0
dsb-2(me96)	12	0	33	66	5	22	49	1	3	18	0	9	3	0	0
dsb-2(me96)	1	1	25	49	4	51	50	1	10	11	2	3	4	1	0
dsb-2(me96)	1	1	17	70	6	28	52	3	36	1	0	1	0	3	1
dsb-2(me96)	6	0	36	49	2	39	39	4	14	4	0	10	4	0	1
dsb-2(me96)	6	1	30	55	2	19	32	6	15	5	0	14	1	0	1
dsb-2(me96)	7	0	38	71	2	21	36	3	25	16	0	13	2	1	5
dsb-2(me96)	0	0	0	33	4	68	111	4	9	69	2	11	N/A	N/A	N/A
dsb-2(me96)	3	0	8	76	2	66	127	6	8	13	3	13	N/A	N/A	N/A
dsb-2(me96)	0	0	0	19	5	81	87	8	10	31	1	6	N/A	N/A	N/A
dsb-2(me96)	0	0	0	27	6	79	96	7	20	47	11	28	N/A	N/A	N/A
dsb-2(me96)	2	1	20	82	9	61	68	2	6	47	1	24	N/A	N/A	N/A
dsb-1(1A);dsb-2	0	0	38	0	1	65	1	0	64	4	0	62	0	0	22
dsb-1(1A);dsb-2	1	0	30	0	0	84	1	2	64	1	0	65	0	1	36
dsb-1(1A);dsb-2	0	0	32	0	0	86	0	0	90	8	3	31	5	0	0
dsb-1(1A);dsb-2	0	0	46	0	0	60	1	0	58	2	1	45	2	0	47
dsb-1(1A);dsb-2	0	0	32	0	0	91	3	0	50	1	0	15	0	0	5
dsb-1(1A);dsb-2	0	0	45	5	0	68	2	0	59	2	0	44	4	2	27
dsb-1(2A);dsb-2	0	0	29	17	1	73	17	2	54	0	0	20	4	4	14
dsb-1(2A);dsb-2	0	0	33	16	2	77	12	4	65	14	1	37	2	2	28
dsb-1(2A);dsb-2	0	1	27	3	1	86	9	2	80	6	0	40	3	0	7
dsb-1(2A);dsb-2	0	0	26	7	4	77	13	4	58	6	0	50	2	2	20
dsb-1(2A);dsb-2	1	0	29	13	2	50	16	1	51	6	0	44	1	0	8
dsb-1(3A);dsb-2	0	0	38	2	0	128	5	0	113	3	0	8	2	0	2
dsb-1(3A);dsb-2	0	1	50	0	0	118	1	1	96	1	0	47	3	0	7
dsb-1(3A);dsb-2	1	0	47	1	0	110	0	0	92	1	0	17	0	0	10
dsb-1(3A);dsb-2	0	0	45	1	0	127	9	2	51	0	0	13	1	0	24
dsb-1(3A);dsb-2	0	0	44	0	0	137	5	3	108	0	0	4	0	0	1
dsb-1(3A);dsb-2	1	0	51	0	0	117	7	1	92	2	1	23	4	0	13
dsb-1(3A);dsb-2	0	0	58	0	0	131	2	2	97	0	1	25	0	0	7
dsb-1(3A);dsb-2	0	0	45	1	1	120	3	2	83	1	0	19	1	0	4
dsb-1(5A);dsb-2	0	0	0	2	0	29	0	0	24	0	0	1	0	0	0
dsb-1(5A);dsb-2	0	0	34	0	0	163	1	0	154	0	0	16	0	0	2
dsb-1(5A);dsb-2	0	0	45	0	1	152	0	0	143	0	0	29	0	0	2
dsb-1(5A);dsb-2	0	0	33	0	0	151	2	0	135	2	0	3	0	0	0
dsb-1(5A);dsb-2	0	0	22	0	0	113	1	0	104	0	0	18	0	0	6
dsb-1(5A);dsb-2	0	0	5	0	0	57	0	0	50	1	0	1	0	0	0
dsb-1(5A);dsb-2	0	0	3	0	0	56	2	0	31	0	0	1	1	0	0
dsb-1(1A);pph4	14	1	0	33	1	1	6	0	0	0	0	0	0	0	0
dsb-1(1A);pph4	6	1	0	29	1	1	4	1	2	0	0	0	0	1	0
dsb-1(1A);pph4	23	0	0	45	0	3	13	1	2	3	0	0	0	0	0
dsb-1(1A);pph4	16	0	0	55	0	1	6	0	0	4	0	0	0	0	0
dsb-1(1A);pph4	24	0	1	38	0	5	15	0	2	0	0	0	0	0	0
dsb-1(1A);pph4	10	0	0	45	0	1	14	0	1	2	0	0	6	1	1
dsb-1(1A);pph4	5	0	0	34	2	1	12	0	1	0	1	0	0	0	0
pph-4.1; dsb-1(5A)	19	0	4	18	0	11	6	2	5	1	1	2	2	0	0
pph-4.1; dsb-1(5A)	10	0	5	49	1	17	28	0	4	4	0	0	2	0	0
pph-4.1; dsb-1(5A)	8	0	9	16	0	49	10	1	8	0	1	10	2	0	0
pph-4.1; dsb-1(5A)	0	0	3	3	0	11	0	0	2	0	0	7	0	0	4
pph-4.1; dsb-1(5A)	20	1	2	38	1	23	10	0	4	3	0	6	0	0	0
pph-4.1; dsb-1(5A)	35	1	0	58	1	9	22	0	4	1	0	0	3	0	0
pph-4.1; dsb-1(5A)	15	3	5	21	2	15	8	0	11	1	0	4	0	0	1
pph-4.1; dsb-1(5A)	5	2	1	33	1	10	8	0	3	0	0	0	0	0	1
pph-4.1; dsb-1(5A)	33	3	7	42	3	40	14	0	18	4	1	3	0	0	2
pph-4.1; dsb-1(5A)	32	0	3	44	0	12	7	1	8	2	0	2	0	0	0
pph-4.1; dsb-1(5A)	26	3	15	23	2	34	12	0	20	6	0	5	1	0	12
pph-4.1; dsb-1(5A)	28	1	3	40	2	15	8	0	7	1	0	1	0	0	0
