# Supplementary material for: Phosphoregulation of DSB-1 mediates control of meiotic double-strand break activity
Source: eLife journal article supplement (doi:10.7554/elife.77956), 2022-06-27
Supplement: supp [file elife-77956-supp-v1.zip › elife_poa_e77956_Figure_5_source_data_2.xlsx]

## Sheet: Figure 5C
Figure 5C WB ratio of phos/unphos band intensity
	control young"	control old	dsb-2 young	dsb-2 old	5A young	5A old
	0.67169	1.10966	0.819475	0.864959	0.327565	1.28258
	0.736564	0.950476	0.596753	0.766903	0.347053	0.614219
	0.513663	0.802334	0.929367	0.840024	0.320418	0.305663
	0.641383	0.810093	1.10683	1.02532	0.322086	0.453176
			1.14099	0.835658	0.454201	0.616353
