# Supplementary material for: Phosphoregulation of DSB-1 mediates control of meiotic double-strand break activity
Source: eLife journal article supplement (doi:10.7554/elife.77956), 2022-06-27
Supplement: supp [file elife-77956-supp-v1.zip › elife_poa_e77956_Table_1_source_data_1.xlsx]

## Sheet: 5B
Table 1 Embryonic viability of each genotype
Strain ID_plate#	#of Dead eggs on P1	# of Males on P1	# of HMP on P1	#of Dead eggs on P2	# of Males on P2	# of HMP on P2	#of Dead eggs on P3	# of Males on P3	# of HMP on P3	#of Dead eggs on P4	# of Males on P4	# of HMP on P4	#of Dead eggs on P5	# of Males on P5	# of HMP on P5	Total Males	Total HMP	Total Eggs(Brood size)	EV(%)	Percentage of males(%)	Avg. of HIM(%)	Avg. of EV(%)	Total egg # of this genotype
N2	0	0	21	0	0	123	0	0	124	0	0	21	1	0	3	0	292	293	99.66	0	0.0375	99.2837	1990	N2
N2	0	0	21	0	0	110	3	0	104	1	0	33	0	0	6	0	274	278	98.56	0
N2	0	1	9	1	0	107	2	0	121	0	0	73	1	0	21	1	331	335	98.81	0.3
N2	0	0	33	0	0	117	0	0	77	0	0	11	0	0	0	0	238	238	100	0
N2	0	0	14	0	0	94	1	0	91	0	0	6	0	0	0	0	205	206	99.51	0
N2	0	0	2	1	0	33	0	0	45	0	0	6	1	0	0	0	86	88	97.73	0
N2	0	0	24	0	0	106	0	0	102	0	0	16	0	0	4	0	252	252	100	0
N2	0	0	25	0	0	126	0	0	136	0	0	5	0	0	8	0	300	300	100	0
GFP-dsb1	0	0	22	0	0	131	0	0	140	1	0	33	0	0	2	0	328	329	99.7	0	0.19	99.1025	2578	GFP::dsb1_1
GFP-dsb1	0	0	36	0	0	133	0	0	124	0	0	16	0	0	4	0	313	313	100	0
GFP-dsb1	0	0	35	0	0	142	2	0	162	0	0	33	0	1	7	1	379	381	99.48	0.26
GFP-dsb1	1	0	12	1	1	128	4	0	84	0	0	6	2	0	7	1	237	245	96.73	0.42
GFP-dsb1	0	0	16	0	0	107	1	1	153	1	0	94	0	1	14	2	384	386	99.48	0.52
GFP-dsb1	1	0	27	1	0	112	0	0	121	0	0	24	0	0	2	0	286	288	99.31	0
GFP-dsb1	0	0	28	0	0	133	0	1	110	1	0	24	0	0	20	1	315	316	99.68	0.32
GFP-dsb1	1	0	28	2	0	134	2	0	119	0	0	31	0	0	3	0	315	320	98.44	0
dsb-1(1A)	0	0	31	1	0	78	0	0	70	3	0	53	0	0	49	0	281	285	98.6	0	0.149091	98.4664	3427	dsb-1(1A)
dsb-1(1A)	0	0	39	3	0	110	7	0	110	2	0	65	2	0	26	0	350	364	96.15	0
dsb-1(1A)	0	0	26	0	0	84	2	0	82	3	0	67	0	0	43	0	302	307	98.37	0
dsb-1(1A)	0	0	18	0	0	83	0	0	87	1	0	59	0	0	45	0	292	293	99.66	0
dsb-1(1A)	0	0	44	1	0	79	0	0	95	0	0	72	0	0	30	0	320	321	99.69	0
dsb-1(1A)	0	0	24	3	0	99	2	0	93	4	0	70	1	0	25	0	311	321	96.88	0
dsb-1(1A)	0	0	26	0	0	75	3	0	77	0	0	55	0	0	35	0	268	271	98.89	0
dsb-1(1A)	0	0	37	0	0	131	2	0	79	1	0	25	1	0	20	0	292	296	98.65	0
dsb-1(1A)	1	0	35	1	0	131	1	1	120	0	0	29	2	0	26	1	341	347	98.56	0.29
dsb-1(1A)	0	0	40	2	0	124	3	3	107	0	0	13	0	0	1	3	285	293	98.29	1.04
dsb-1(1A)	1	0	44	0	0	141	0	1	123	1	0	15	0	0	3	1	326	329	99.39	0.31
dsb-1(2A)	0	0	15	0	0	78	0	0	88	0	0	59	0	0	2	0	242	242	100	0	0	98.254	1347	dsb-1(2A)
dsb-1(2A)	0	0	35	0	0	88	2	0	77	0	0	27	0	0	1	0	228	230	99.13	0
dsb-1(2A)	0	0	19	0	0	96	3	0	85	3	0	60	2	0	50	0	310	318	97.48	0
dsb-1(2A)	0	0	53	1	0	90	5	0	82	3	0	46	0	0	12	0	283	292	96.92	0
dsb-1(2A)	0	0	0	1	0	69	3	0	94	2	0	71	0	0	25	0	259	265	97.74	0
dsb-1(3A)	0	0	27	0	0	109	0	0	118	0	0	14	0	0	4	0	272	272	100	0	0.1875	99.2887	2056	dsb-1(3A)
dsb-1(3A)	0	0	54	1	0	100	1	1	96	1	0	11	0	0	6	1	267	271	98.89	0.37
dsb-1(3A)	0	0	36	1	0	120	0	0	85	1	0	7	1	0	6	0	254	257	98.83	0
dsb-1(3A)	0	0	48	0	0	119	2	0	87	0	1	5	1	0	4	1	263	267	98.88	0.38
dsb-1(3A)	0	0	56	1	0	127	1	0	95	1	0	32	0	1	19	1	329	333	99.1	0.3
dsb-1(3A)	0	0	37	0	1	104	0	0	68	0	0	10	0	0	1	1	220	221	100	0.45
dsb-1(3A)	0	0	47	0	0	107	0	0	60	1	0	8	0	0	0	0	222	223	99.55	0
dsb-1(3A)	0	0	38	1	0	92	0	0	20	0	0	36	1	0	24	0	210	212	99.06	0
dsb-1(5A)	0	0	24	0	0	125	2	0	124	0	0	26	0	0	13	0	312	314	99.36	0	0	99.2225	2546	dsb-1(5A)
dsb-1(5A)	0	0	17	1	0	146	0	0	142	0	0	42	0	0	4	0	351	352	99.72	0
dsb-1(5A)	0	0	16	0	0	119	4	0	105	1	0	87	0	0	25	0	352	357	98.6	0
dsb-1(5A)	0	0	28	1	0	145	5	0	74	0	0	0	0	0	0	0	247	253	97.63	0
dsb-1(5A)	0	0	24	0	0	138	0	0	107	0	0	30	0	0	12	0	311	311	100	0
dsb-1(5A)	0	0	38	0	0	126	0	0	143	1	0	25	0	0	2	0	334	335	99.7	0
dsb-1(5A)	0	0	20	0	0	126	2	0	136	1	0	47	0	0	12	0	341	344	99.13	0
dsb-1(5A)	0	0	36	0	0	112	0	0	79	1	0	38	0	0	14	0	279	280	99.64	0
pph-4.1(tm1598)	12	0	0	23	1	0	5	0	0	0	0	0	0	0	0	1	0	41	2.44	100	45.6046	1.99571	1424	pph-4.1(tm1598)
pph-4.1(tm1598)	23	1	0	46	2	2	30	0	1	15	0	1	12	0	0	3	4	133	5.26	42.86
pph-4.1(tm1598)	29	0	0	50	1	1	32	0	0	13	0	0	6	0	0	1	1	132	1.52	50
pph-4.1(tm1598)	22	0	0	49	2	1	14	0	0	10	0	0	4	0	0	2	1	102	2.94	66.67
pph-4.1(tm1598)	24	0	0	54	0	2	35	0	0	6	0	0	2	0	0	0	2	123	1.63	0
pph-4.1(tm1598)	10	0	0	27	0	1	21	0	0	5	0	0	5	0	0	0	1	69	1.45	0
pph-4.1(tm1598)	24	1	0	49	0	0	19	0	0	5	0	1	1	0	0	1	1	100	2	50
pph-4.1(tm1598)	7	1	0	57	0	1	15	0	0	13	0	0	2	0	0	1	1	96	2.08	50
pph-4.1(tm1598)	20	0	0	55	1	1	42	0	1	18	0	0	9	0	0	1	2	147	2.04	33.33
pph-4.1(tm1598)	22	0	0	61	0	1	24	0	0	9	0	0	3	0	0	0	1	120	0.83	0
pph-4.1(tm1598)	25	0	0	64	0	0	6	0	0	3	0	0	2	0	0	0	0	100	0	0
pph-4.1(tm1598)	15	1	0	39	0	0	9	0	0	10	0	1	9	0	0	1	1	84	2.38	50
pph-4.1(tm1598)	19	0	1	51	0	0	15	1	0	3	0	0	0	0	0	1	1	90	2.22	50
pph-4.1(tm1598)	28	1	0	48	0	0	10	0	0	0	0	0	0	0	0	1	0	87	1.15	100
dsb-2(me96)	1	3	23	64	7	44	75	4	5	9	1	0	0	0	0	15	72	236	36.86	17.24	13.8459	39.5524	3413	dsb-2(me96)
dsb-2(me96)	0	0	17	63	7	33	101	7	7	6	2	0	0	0	0	16	57	243	30.04	21.92
dsb-2(me96)	1	2	12	17	3	30	23	0	11	11	2	8	8	2	3	9	64	133	54.89	12.33
dsb-2(me96)	3	0	12	76	8	46	86	1	8	5	0	1	1	0	0	9	67	247	30.77	11.84
dsb-2(me96)	7	1	12	59	13	33	46	3	3	5	0	0	0	0	0	17	48	182	35.71	26.15
dsb-2(me96)	4	2	11	65	9	45	61	5	6	4	0	0	2	0	0	16	62	214	36.45	20.51
dsb-2(me96)	0	0	16	59	10	48	52	5	13	7	0	0	0	0	0	15	77	210	43.81	16.3
dsb-2(me96)	5	1	18	71	9	33	58	3	2	4	0	0	0	0	0	13	53	204	32.35	19.7
dsb-2(me96)	21	0	9	111	3	15	43	0	1	3	0	1	0	0	0	3	26	207	14.01	10.34
dsb-2(me96)	2	2	20	45	6	23	19	1	11	20	2	5	6	1	0	12	59	163	43.56	16.9
dsb-2(me96)	0	0	19	28	3	16	16	1	2	0	0	0	0	0	0	4	37	85	48.24	9.76
dsb-2(me96)	12	0	33	66	5	22	49	1	3	18	0	9	3	0	0	6	67	221	33.03	8.22
dsb-2(me96)	1	1	25	49	4	51	50	1	10	11	2	3	4	1	0	9	89	213	46.01	9.18
dsb-2(me96)	1	1	17	70	6	28	52	3	36	1	0	1	0	3	1	13	83	220	43.64	13.54
dsb-2(me96)	6	0	36	49	2	39	39	4	14	4	0	10	4	0	1	6	100	208	50.96	5.66
dsb-2(me96)	6	1	30	55	2	19	32	6	15	5	0	14	1	0	1	9	79	187	47.06	10.23
dsb-2(me96)	7	0	38	71	2	21	36	3	25	16	0	13	2	1	5	6	102	240	45	5.56
dsb-1(1A);dsb-2	0	0	38	0	1	65	1	0	64	4	0	62	0	0	22	1	251	257	98.05	0.4	1.40077	93.9569	3370	dsb-1(1A);dsb-2
dsb-1(1A);dsb-2	1	0	30	0	0	84	1	2	64	1	0	65	0	1	36	3	279	285	98.95	1.06
dsb-1(1A);dsb-2	0	0	32	0	0	86	0	0	90	8	3	31	5	0	0	3	239	255	94.9	1.24
dsb-1(1A);dsb-2	0	0	46	0	0	60	1	0	58	2	1	45	2	0	47	1	256	262	98.09	0.39
dsb-1(1A);dsb-2	0	0	32	0	0	91	3	0	50	1	0	15	0	0	5	0	193	197	97.97	0
dsb-1(1A);dsb-2	0	0	45	5	0	68	2	0	59	2	0	44	4	2	27	2	243	258	94.96	0.82
dsb-1(1A);dsb-2	1	0	51	12	0	90	8	3	77	6	0	35	5	2	6	5	259	296	89.19	1.89
dsb-1(1A);dsb-2	0	0	49	6	2	46	5	3	80	0	0	46	0	0	10	5	231	247	95.55	2.12
dsb-1(1A);dsb-2	2	0	48	13	2	75	7	3	75	0	1	1	0	0	0	6	199	227	90.31	2.93
dsb-1(1A);dsb-2	1	0	39	8	1	71	6	1	63	3	1	29	1	2	9	5	211	235	91.91	2.31
dsb-1(1A);dsb-2	0	0	44	6	0	68	5	1	88	4	3	36	0	0	9	4	245	264	94.32	1.61
dsb-1(1A);dsb-2	3	1	48	21	1	50	10	0	70	6	1	53	6	1	14	4	235	285	83.86	1.67
dsb-1(1A);dsb-2	0	0	45	4	3	102	3	1	87	4	1	36	9	0	7	5	277	302	93.38	1.77
dsb-1(2A);dsb-2	0	0	29	17	1	73	17	2	54	0	0	20	4	4	14	7	190	235	83.83	3.55	3.30667	83.1233	2413	dsb-1(2A);dsb-2
dsb-1(2A);dsb-2	0	0	33	16	2	77	12	4	65	14	1	37	2	2	28	9	240	293	84.98	3.61
dsb-1(2A);dsb-2	0	1	27	3	1	86	9	2	80	6	0	40	3	0	7	4	240	265	92.08	1.64
dsb-1(2A);dsb-2	0	0	26	7	4	77	13	4	58	6	0	50	2	2	20	10	231	269	89.59	4.15
dsb-1(2A);dsb-2	1	0	29	13	2	50	16	1	51	6	0	44	1	0	8	3	182	222	83.33	1.62
dsb-1(2A);dsb-2	0	0	55	36	7	68	23	1	51	2	0	35	1	0	8	8	217	287	78.4	3.56
dsb-1(2A);dsb-2	0	0	41	38	2	71	18	1	56	1	0	15	0	0	0	3	183	243	76.54	1.61
dsb-1(2A);dsb-2	2	0	37	23	5	67	18	4	64	8	1	39	4	0	14	10	221	286	80.77	4.33
dsb-1(2A);dsb-2	1	1	51	26	5	88	32	5	77	5	3	14	3	0	2	14	232	313	78.59	5.69
dsb-1(3A);dsb-2	0	0	38	2	0	128	5	0	113	3	0	8	2	0	2	0	289	301	96.01	0	0.63625	97.5563	2395	dsb-1(3A);dsb-2
dsb-1(3A);dsb-2	0	1	50	0	0	118	1	1	96	1	0	47	3	0	7	2	318	325	98.46	0.63
dsb-1(3A);dsb-2	1	0	47	1	0	110	0	0	92	1	0	17	0	0	10	0	276	279	98.92	0
dsb-1(3A);dsb-2	0	0	45	1	0	127	9	2	51	0	0	13	1	0	24	2	260	273	95.97	0.76
dsb-1(3A);dsb-2	0	0	44	0	0	137	5	3	108	0	0	4	0	0	1	3	294	302	98.34	1.01
dsb-1(3A);dsb-2	1	0	51	0	0	117	7	1	92	2	1	23	4	0	13	2	296	312	95.51	0.67
dsb-1(3A);dsb-2	0	0	58	0	0	131	2	2	97	0	1	25	0	0	7	3	318	323	99.38	0.93
dsb-1(3A);dsb-2	0	0	45	1	1	120	3	2	83	1	0	19	1	0	4	3	271	280	97.86	1.09
dsb-1(5A);dsb-2	0	0	0	2	0	29	0	0	24	0	0	1	0	0	0	0	54	56	96.43	0	0.0385714	98.64	1596	dsb-1(5A);dsb-2
dsb-1(5A);dsb-2	0	0	34	0	0	163	1	0	154	0	0	16	0	0	2	0	369	370	99.73	0
dsb-1(5A);dsb-2	0	0	45	0	1	152	0	0	143	0	0	29	0	0	2	1	371	372	100	0.27
dsb-1(5A);dsb-2	0	0	33	0	0	151	2	0	135	2	0	3	0	0	0	0	322	326	98.77	0
dsb-1(5A);dsb-2	0	0	22	0	0	113	1	0	104	0	0	18	0	0	6	0	263	264	99.62	0
dsb-1(5A);dsb-2	0	0	5	0	0	57	0	0	50	1	0	1	0	0	0	0	113	114	99.12	0
dsb-1(5A);dsb-2	0	0	3	0	0	56	2	0	31	0	0	1	1	0	0	0	91	94	96.81	0
dsb-1(1A);pph4	14	1	0	33	1	1	6	0	0	0	0	0	0	0	0	2	1	56	5.36	66.67	32.2114	7.39286	496	dsb-1(1A);pph4
dsb-1(1A);pph4	6	1	0	29	1	1	4	1	2	0	0	0	0	1	0	4	3	46	15.22	57.14
dsb-1(1A);pph4	23	0	0	45	0	3	13	1	2	3	0	0	0	0	0	1	5	90	6.67	16.67
dsb-1(1A);pph4	16	0	0	55	0	1	6	0	0	4	0	0	0	0	0	0	1	82	1.22	0
dsb-1(1A);pph4	24	0	1	38	0	5	15	0	2	0	0	0	0	0	0	0	8	85	9.41	0
dsb-1(1A);pph4	10	0	0	45	0	1	14	0	1	2	0	0	6	1	1	1	3	81	4.94	25
dsb-1(1A);pph4	5	0	0	34	2	1	12	0	1	0	1	0	0	0	0	3	2	56	8.93	60
pph-4.1; dsb-1(5A)	19	0	4	18	0	11	6	2	5	1	1	2	2	0	0	3	22	71	35.21	12	7.88667	40.89	1273	dsb-1(5A);pph-4.1
pph-4.1; dsb-1(5A)	10	0	5	49	1	17	28	0	4	4	0	0	2	0	0	1	26	120	22.5	3.7
pph-4.1; dsb-1(5A)	8	0	9	16	0	49	10	1	8	0	1	10	2	0	0	2	76	114	68.42	2.56
pph-4.1; dsb-1(5A)	0	0	3	3	0	11	0	0	2	0	0	7	0	0	4	0	27	30	90	0
pph-4.1; dsb-1(5A)	20	1	2	38	1	23	10	0	4	3	0	6	0	0	0	2	35	108	34.26	5.41
pph-4.1; dsb-1(5A)	35	1	0	58	1	9	22	0	4	1	0	0	3	0	0	2	13	134	11.19	13.33
pph-4.1; dsb-1(5A)	15	3	5	21	2	15	8	0	11	1	0	4	0	0	1	5	36	86	47.67	12.2
pph-4.1; dsb-1(5A)	5	2	1	33	1	10	8	0	3	0	0	0	0	0	1	3	15	64	28.13	16.67
pph-4.1; dsb-1(5A)	33	3	7	42	3	40	14	0	18	4	1	3	0	0	2	7	70	170	45.29	9.09
pph-4.1; dsb-1(5A)	32	0	3	44	0	12	7	1	8	2	0	2	0	0	0	1	25	111	23.42	3.85
pph-4.1; dsb-1(5A)	26	3	15	23	2	34	12	0	20	6	0	5	1	0	12	5	86	159	57.23	5.49
pph-4.1; dsb-1(5A)	28	1	3	40	2	15	8	0	7	1	0	1	0	0	0	3	26	106	27.36	10.34
