# Supplementary figures and images for: Phosphoregulation of DSB-1 mediates control of meiotic double-strand break activity
Source: eLife journal article supplement (doi:10.7554/elife.77956), 2022-06-27

Figure 5—figure supplement 1

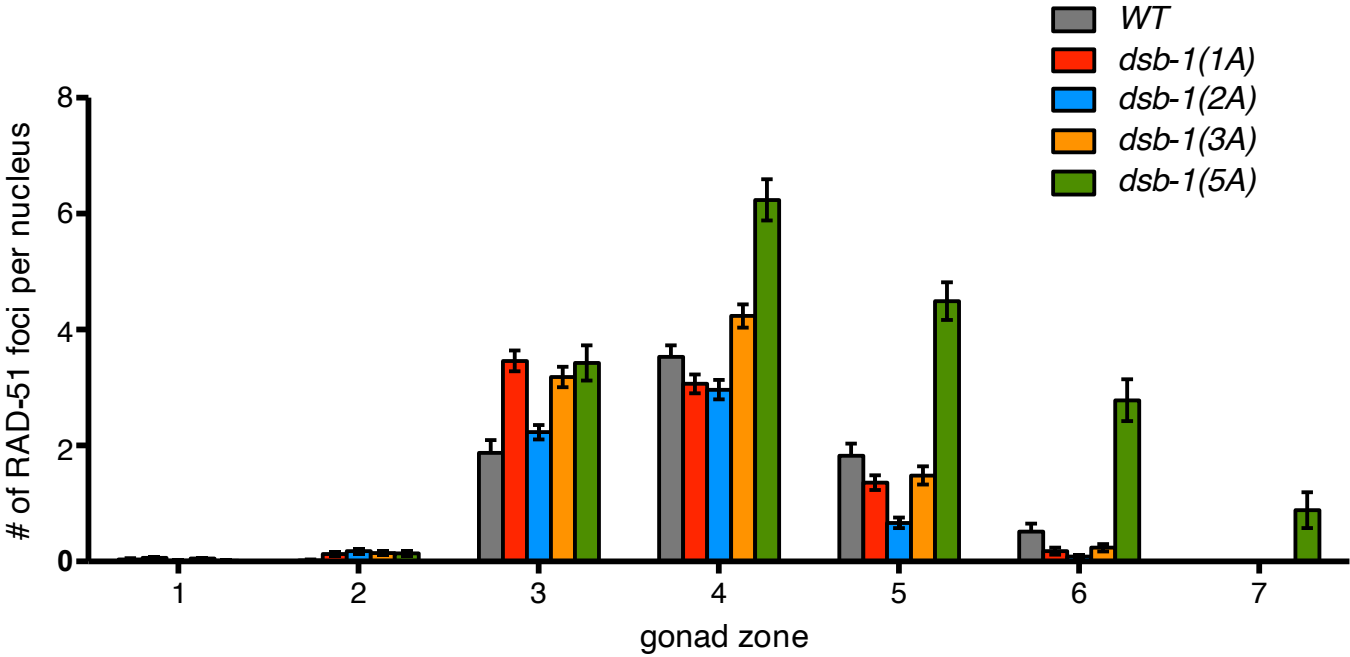

Supplement: supp [file elife-77956-supp-v1.zip]

Figure 5—figure supplement 2

**A**

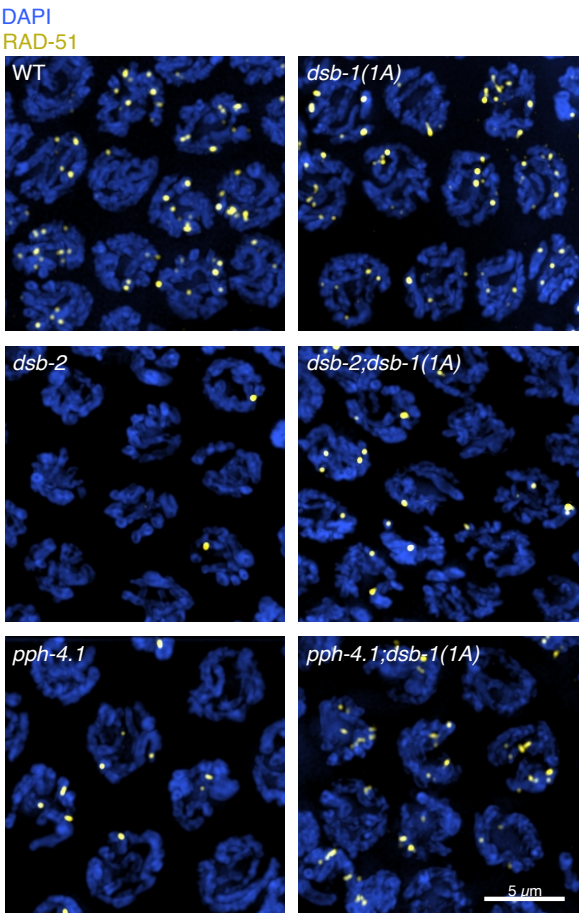

**B**

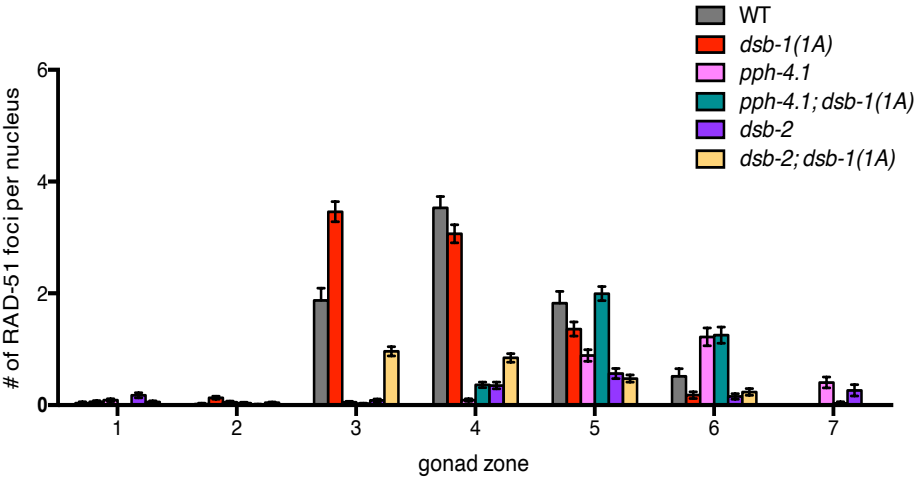

**C**

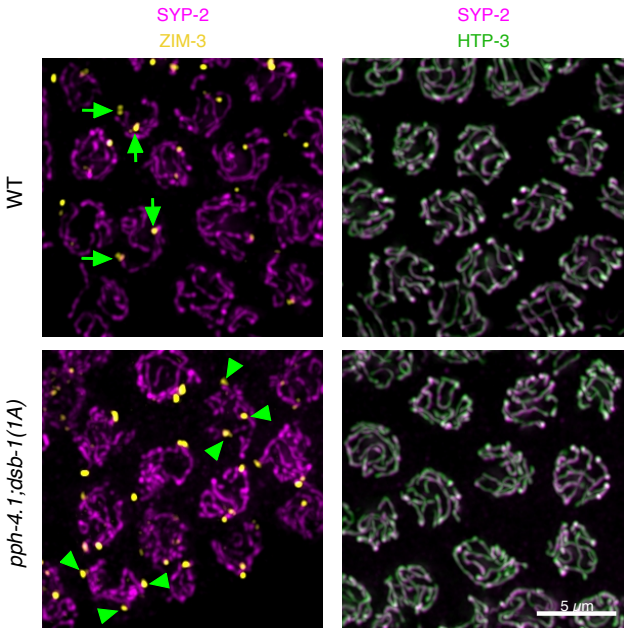

Supplement: supp [file elife-77956-supp-v1.zip]

Figure 1–figure supplement 1

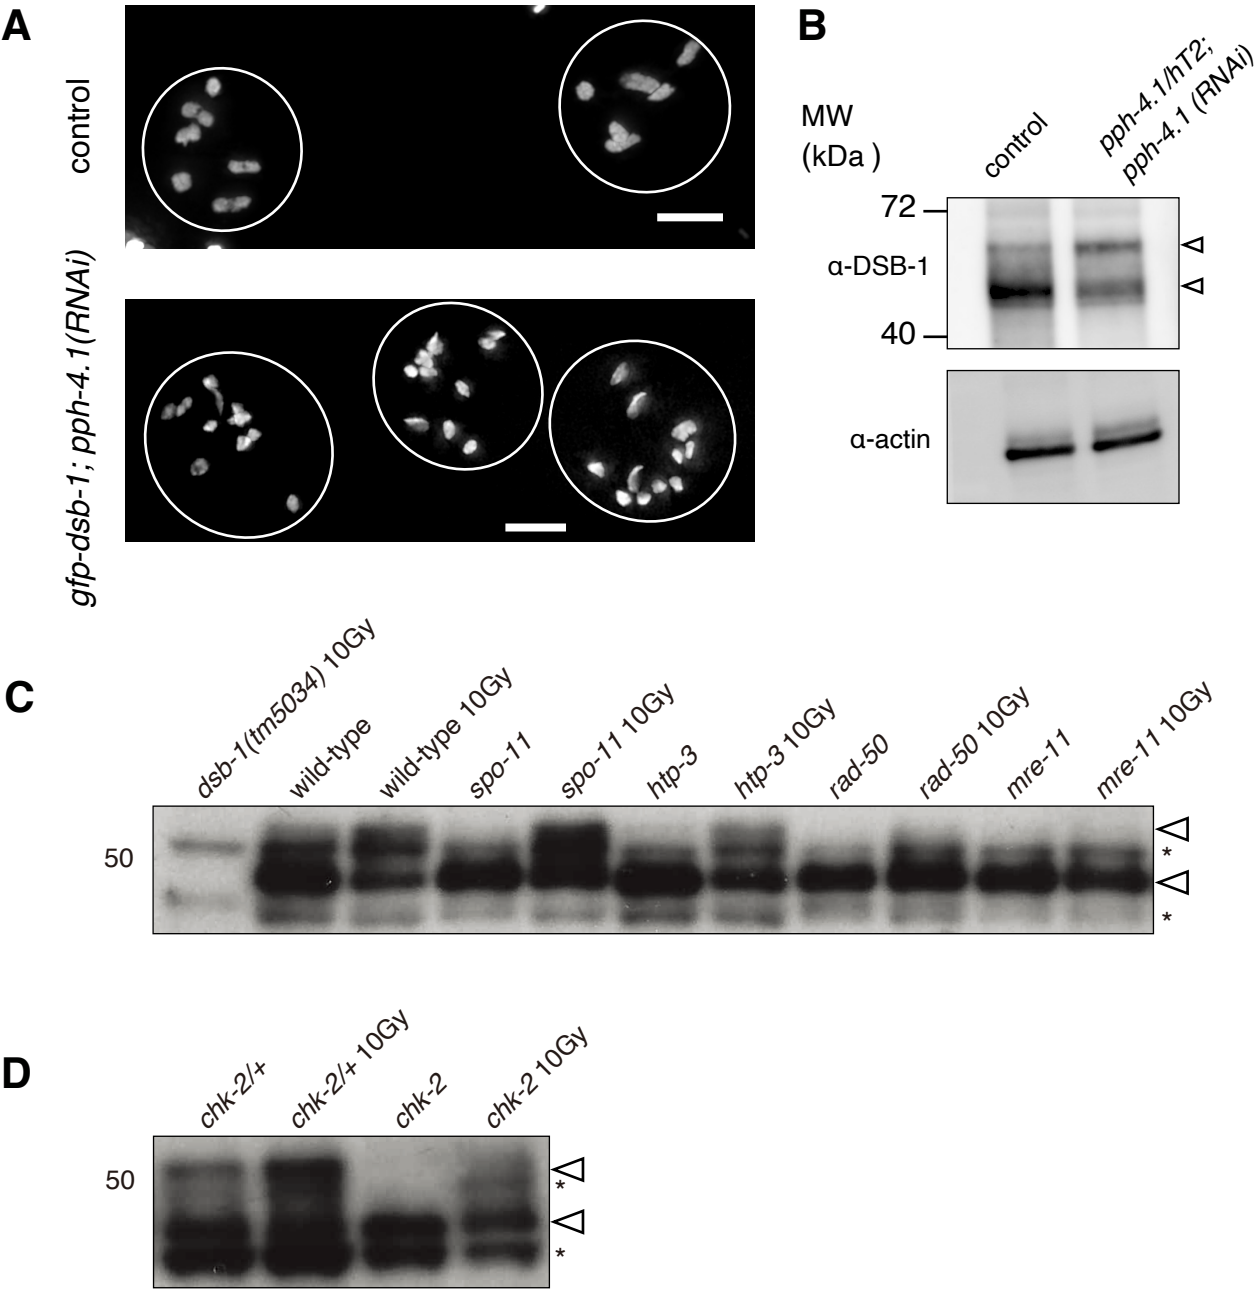

Supplement: supp [file elife-77956-supp-v1.zip]

Figure 3—figure supplement 1

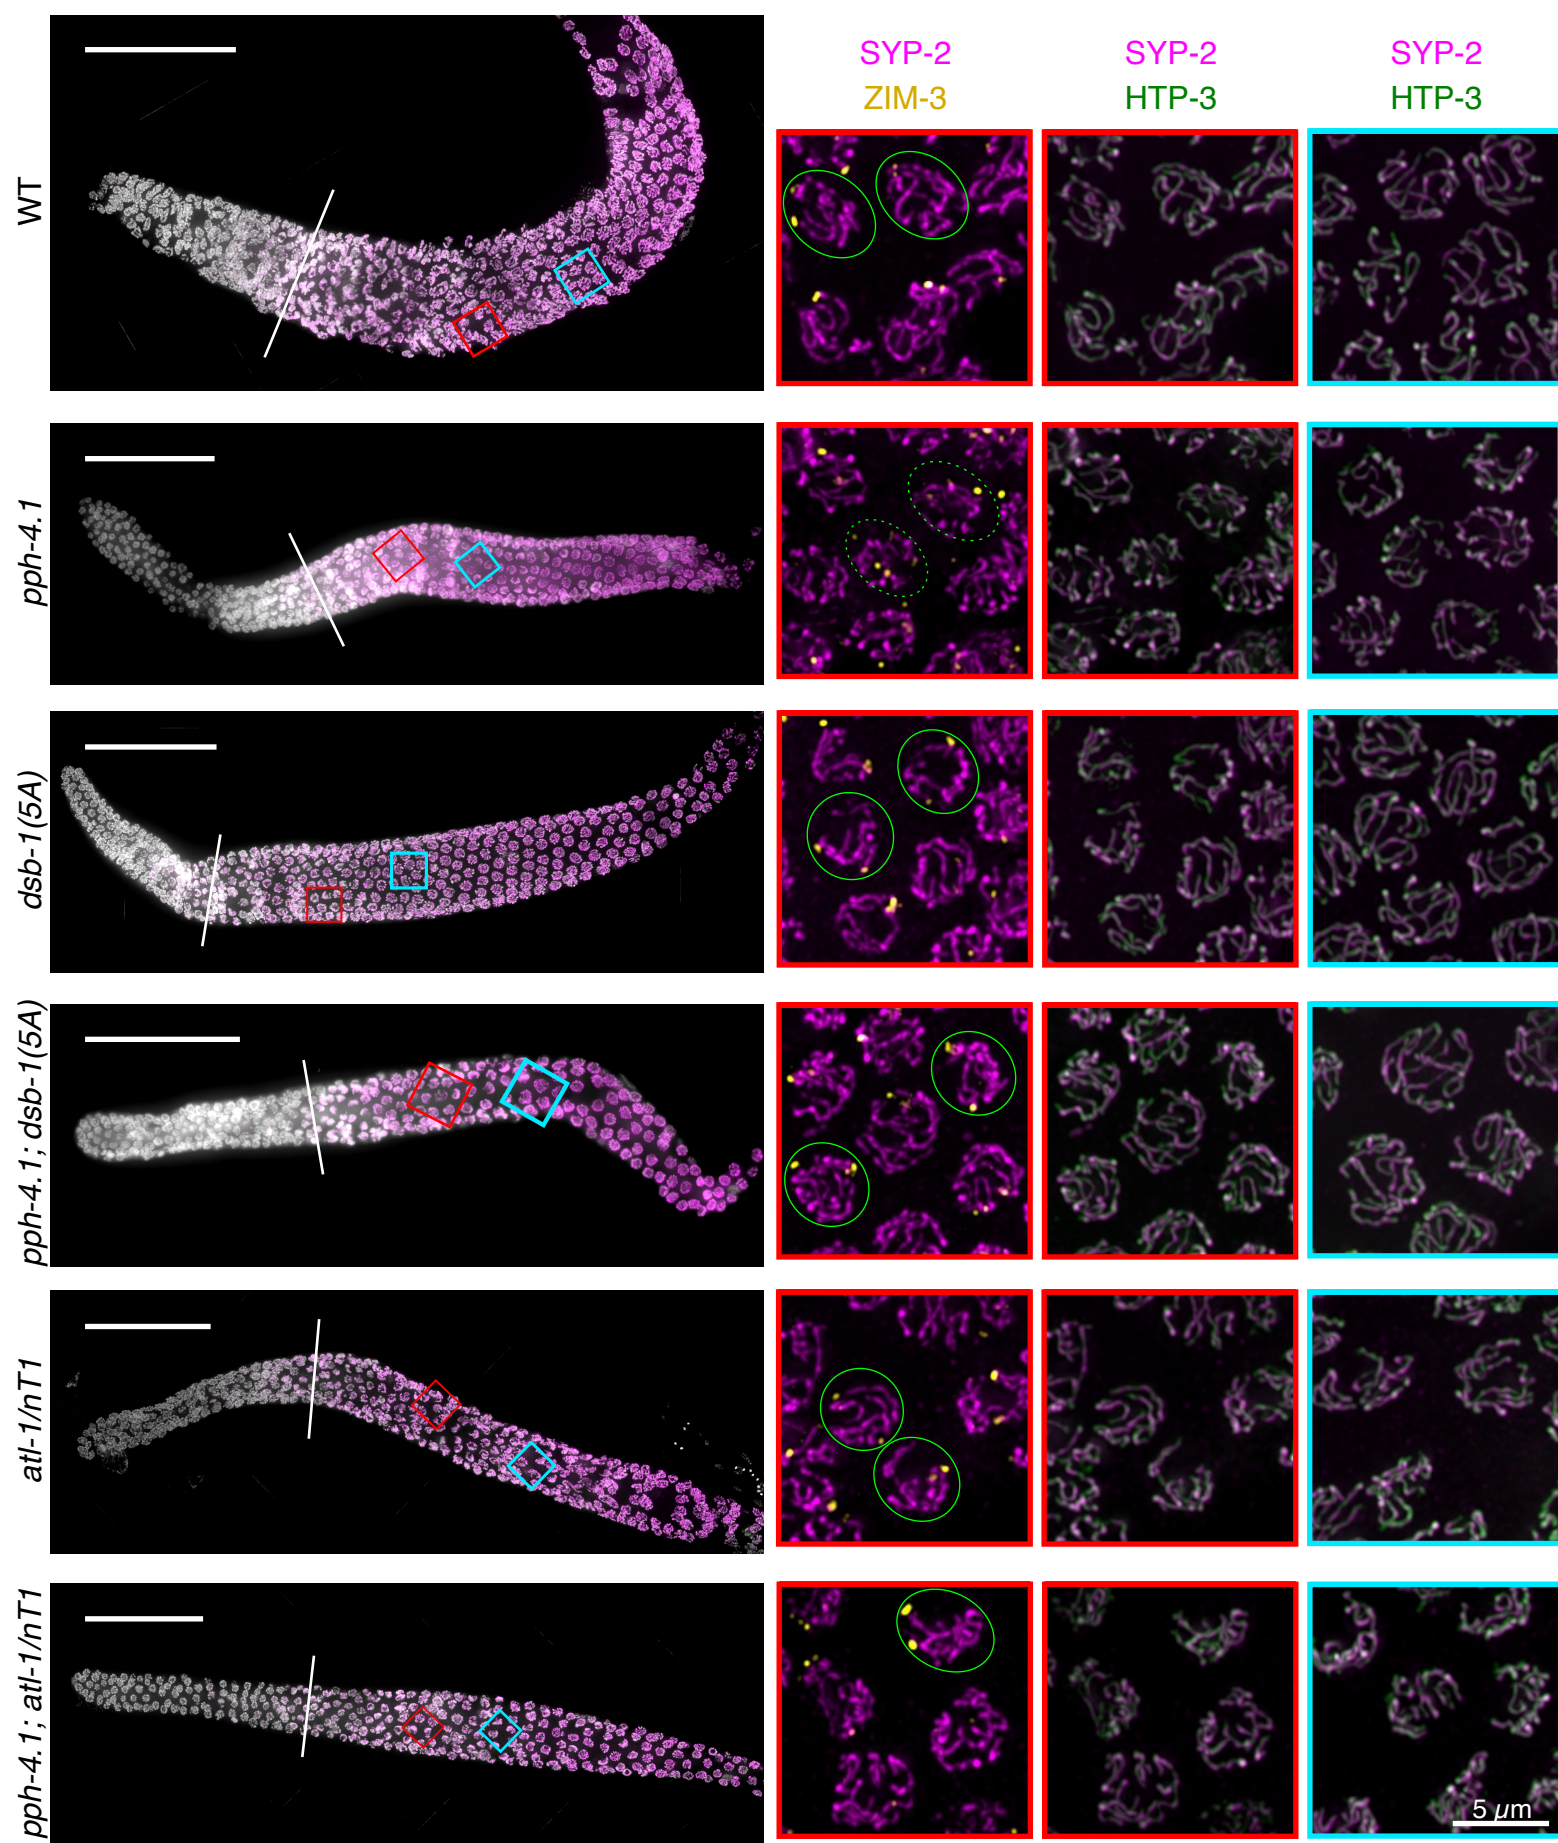

Supplement: supp [file elife-77956-supp-v1.zip]

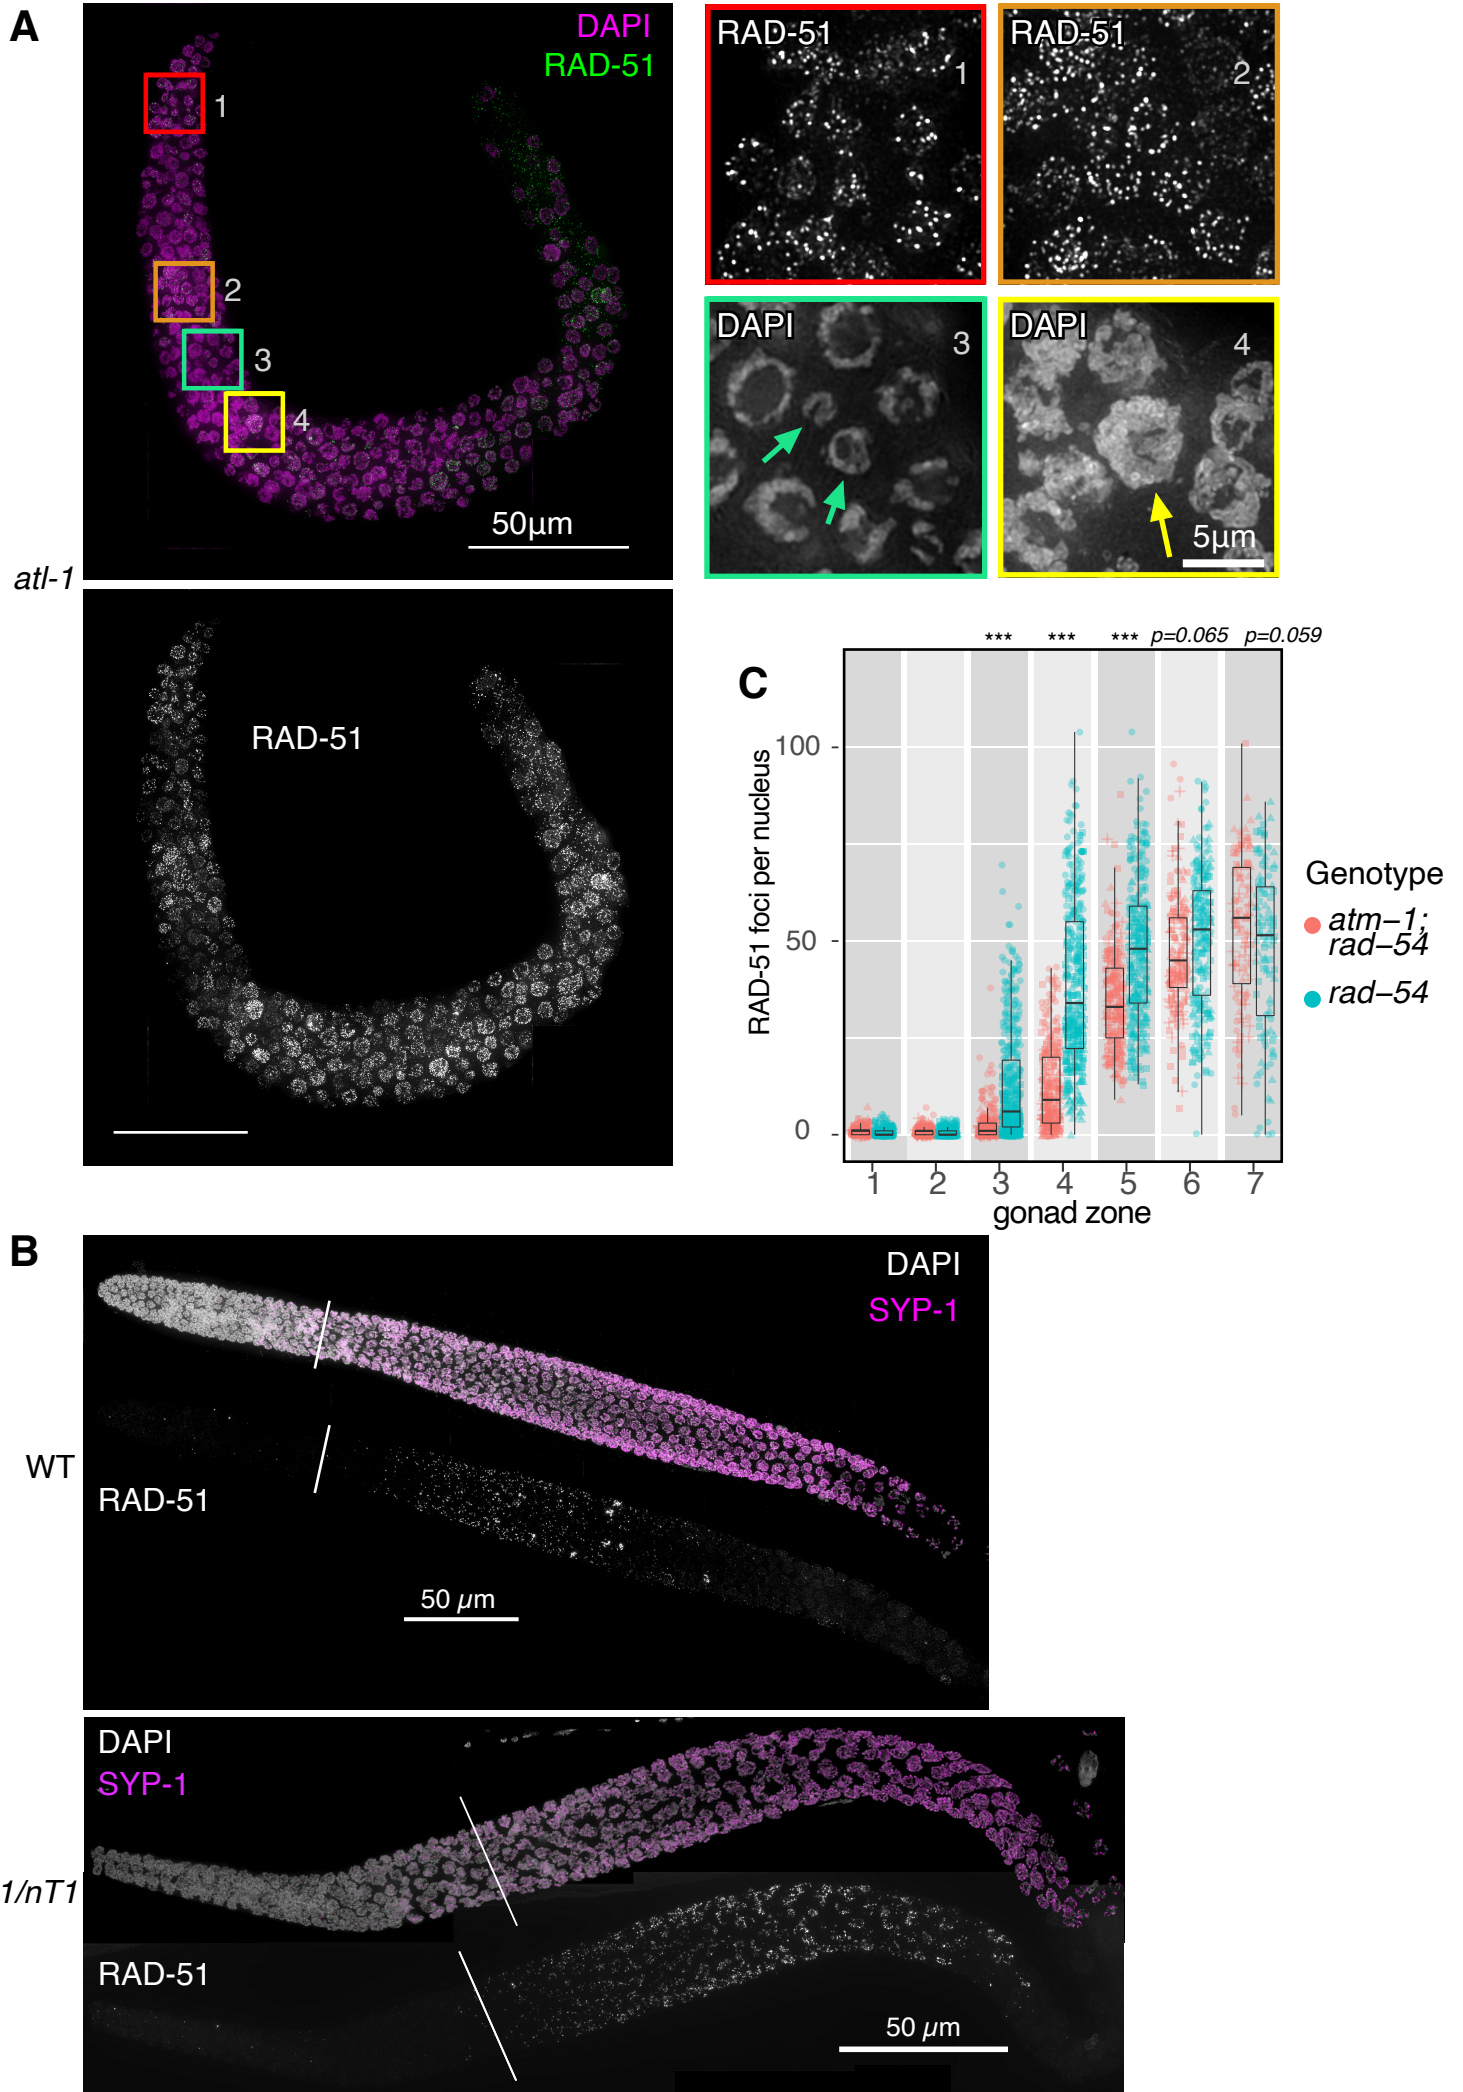

Supplement: supp [file elife-77956-supp-v1.zip › elife_poa_e77956_Figure_1_figure_supplement_2.pdf]

Figure 2—figure supplement 2

A

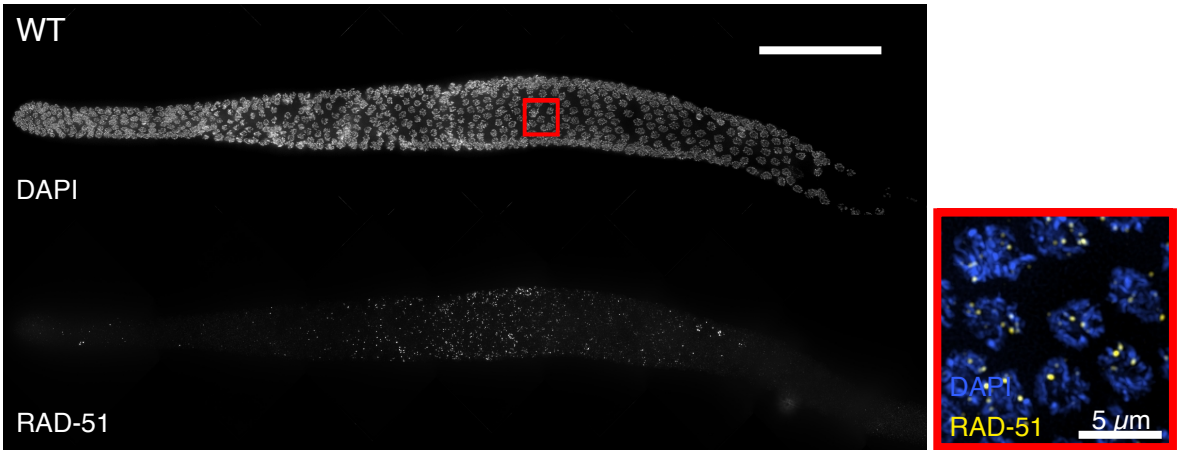

B

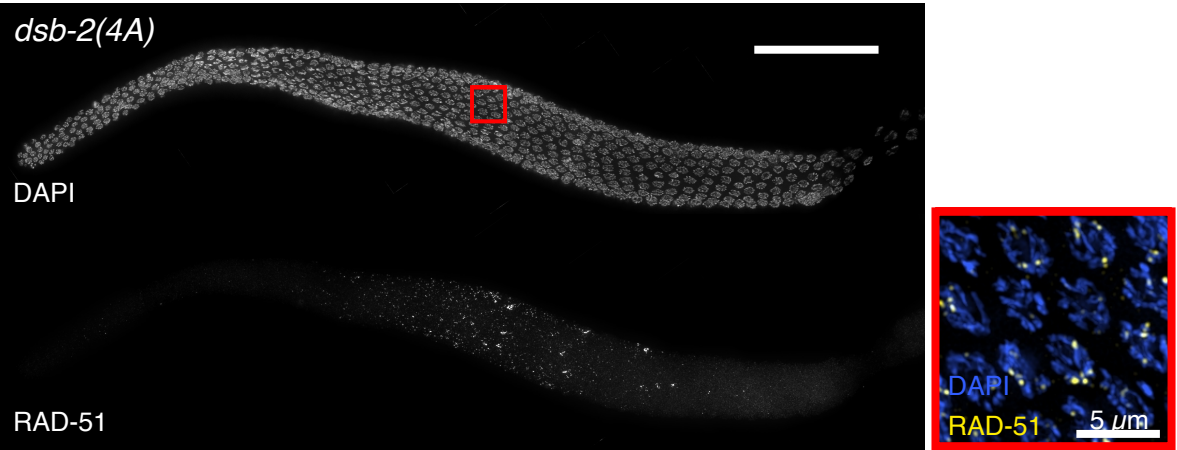

Supplement: supp [file elife-77956-supp-v1.zip › elife_poa_e77956_Figure_2_figure_supplement_2.pdf]

Figure 6–figure supplement 1

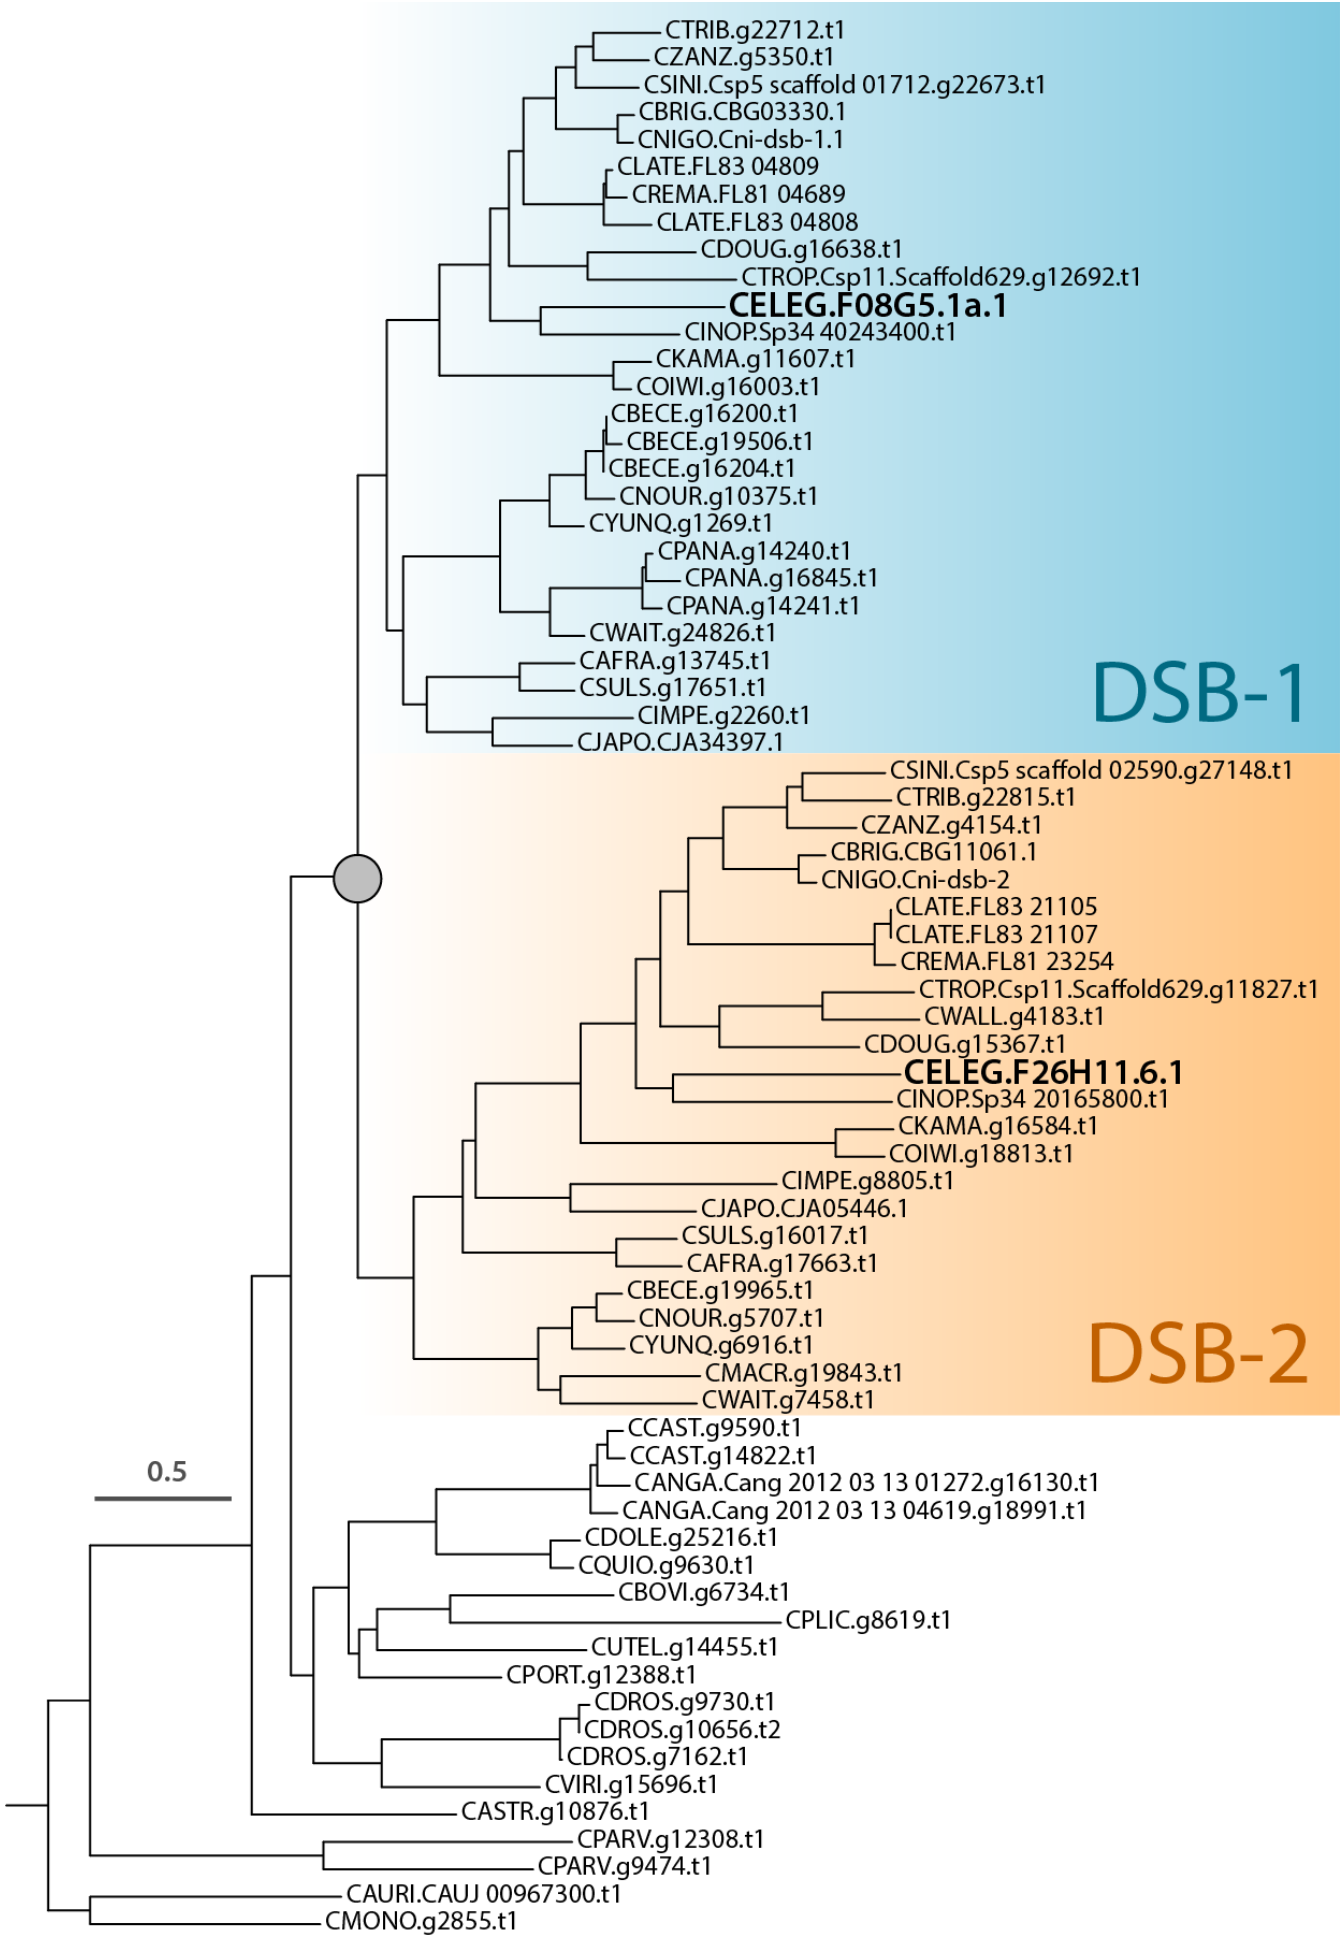

Supplement: supp [file elife-77956-supp-v1.zip › elife_poa_e77956_Figure_6_figure_supplement_1.pdf]
